# Supplementary material
Source: PubMed Central journal article supplement (PMC3510762)

7.418  
7.403  
7.402  
7.365  
7.357  
7.349  
7.342  
7.326  
7.309  
7.307  
7.294  
7.292  
7.291  
7.290  
7.288  
7.270  
7.252  
6.528  
6.497  
6.443  
6.430  
6.416  
6.398

3.612  
3.599

S10

$^1\text{H}$  NMR,  $\text{CDCl}_3$   
Pulse Sequence: zg  
Spectrometer Freq.: 500.13 MHz  
Spectral Width: 19.99 ppm  
Number of Scans: 16  
Relaxation Delay: 1.000 s

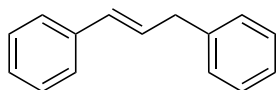

Table 2, Entry 1, 3a

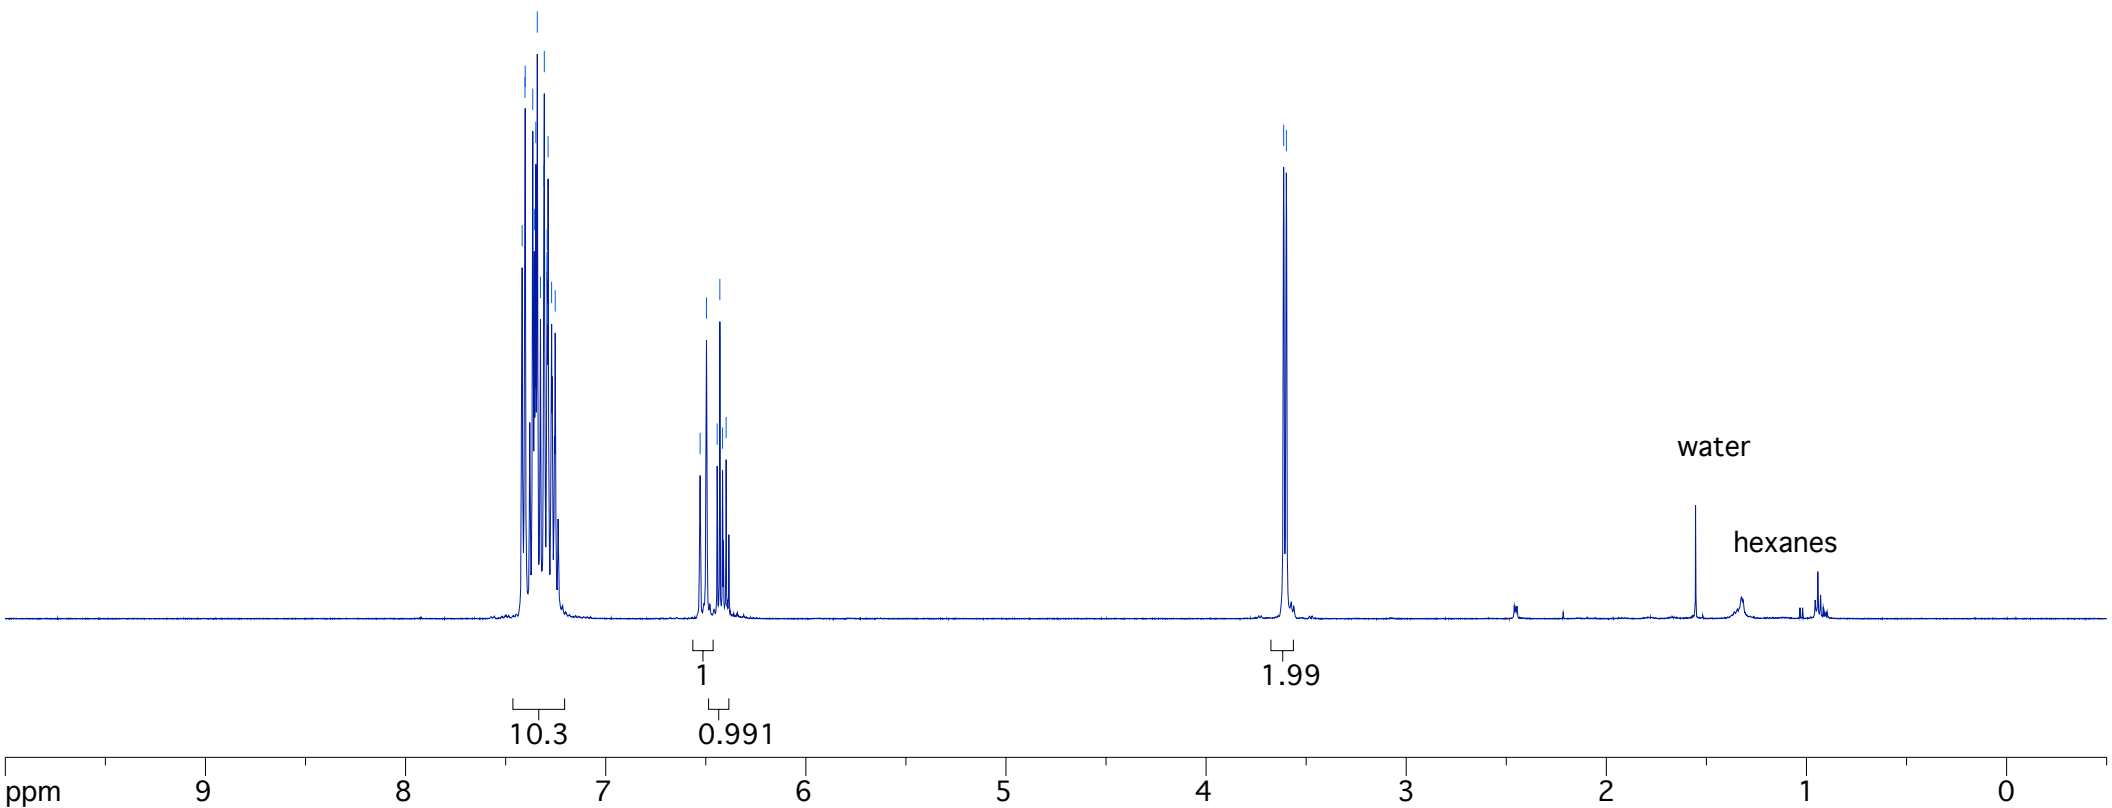

S11

$^{13}\text{C}$  NMR,  $\text{CDCl}_3$   
Pulse Sequence: zgdc  
Spectrometer Freq.: 125.77 MHz  
Spectral Width: 301.18 ppm  
Number of Scans: 349  
Relaxation Delay: 2.000 s

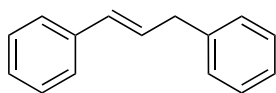

Table 2, Entry 1, 3a

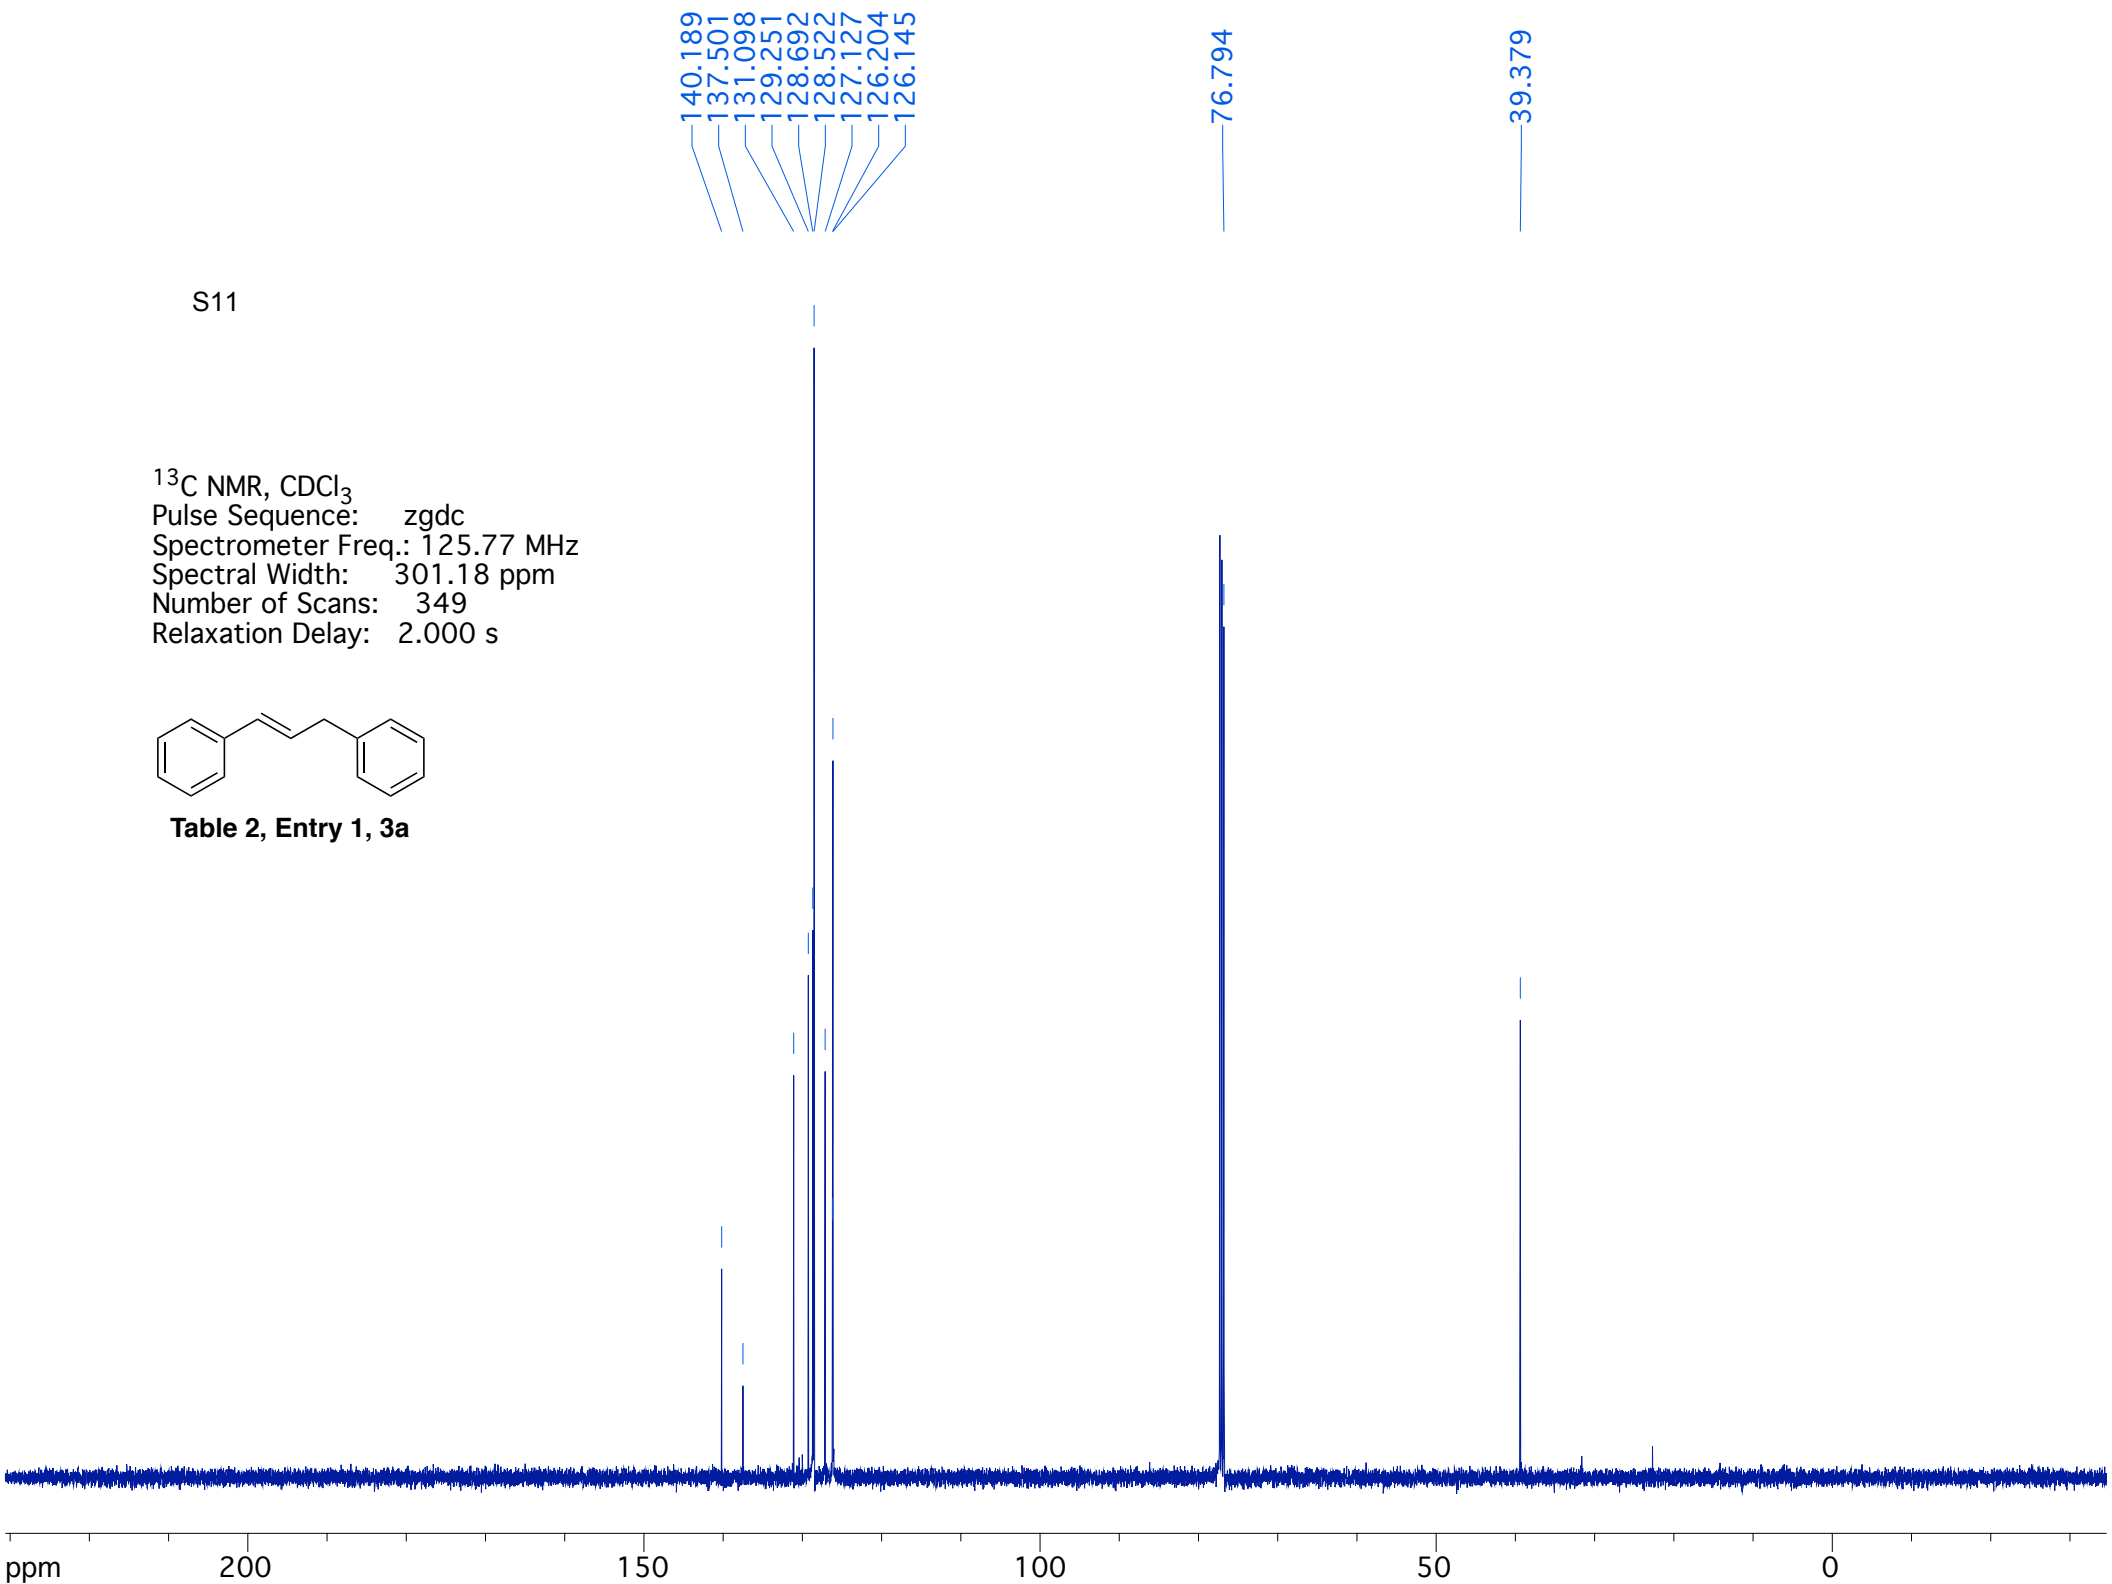

7.410  
7.406  
7.388  
7.387  
7.370  
7.366  
7.351  
7.349  
7.347  
7.342  
7.338  
7.332  
7.328  
7.309  
7.294  
7.289  
7.284  
7.278  
7.276  
7.256  
7.243  
7.238  
7.220  
6.520  
6.480  
6.435  
6.419  
6.402  
6.379  
6.362

3.600  
3.584

S12

<sup>1</sup>H NMR, CDCl<sub>3</sub>  
Pulse Sequence: zg  
Spectrometer Freq.: 400.13 MHz  
Spectral Width: 20.42 ppm  
Number of Scans: 1  
Relaxation Delay: 1.000 s

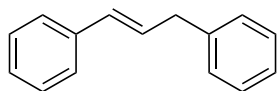

Table 2, Entry 2, 3a

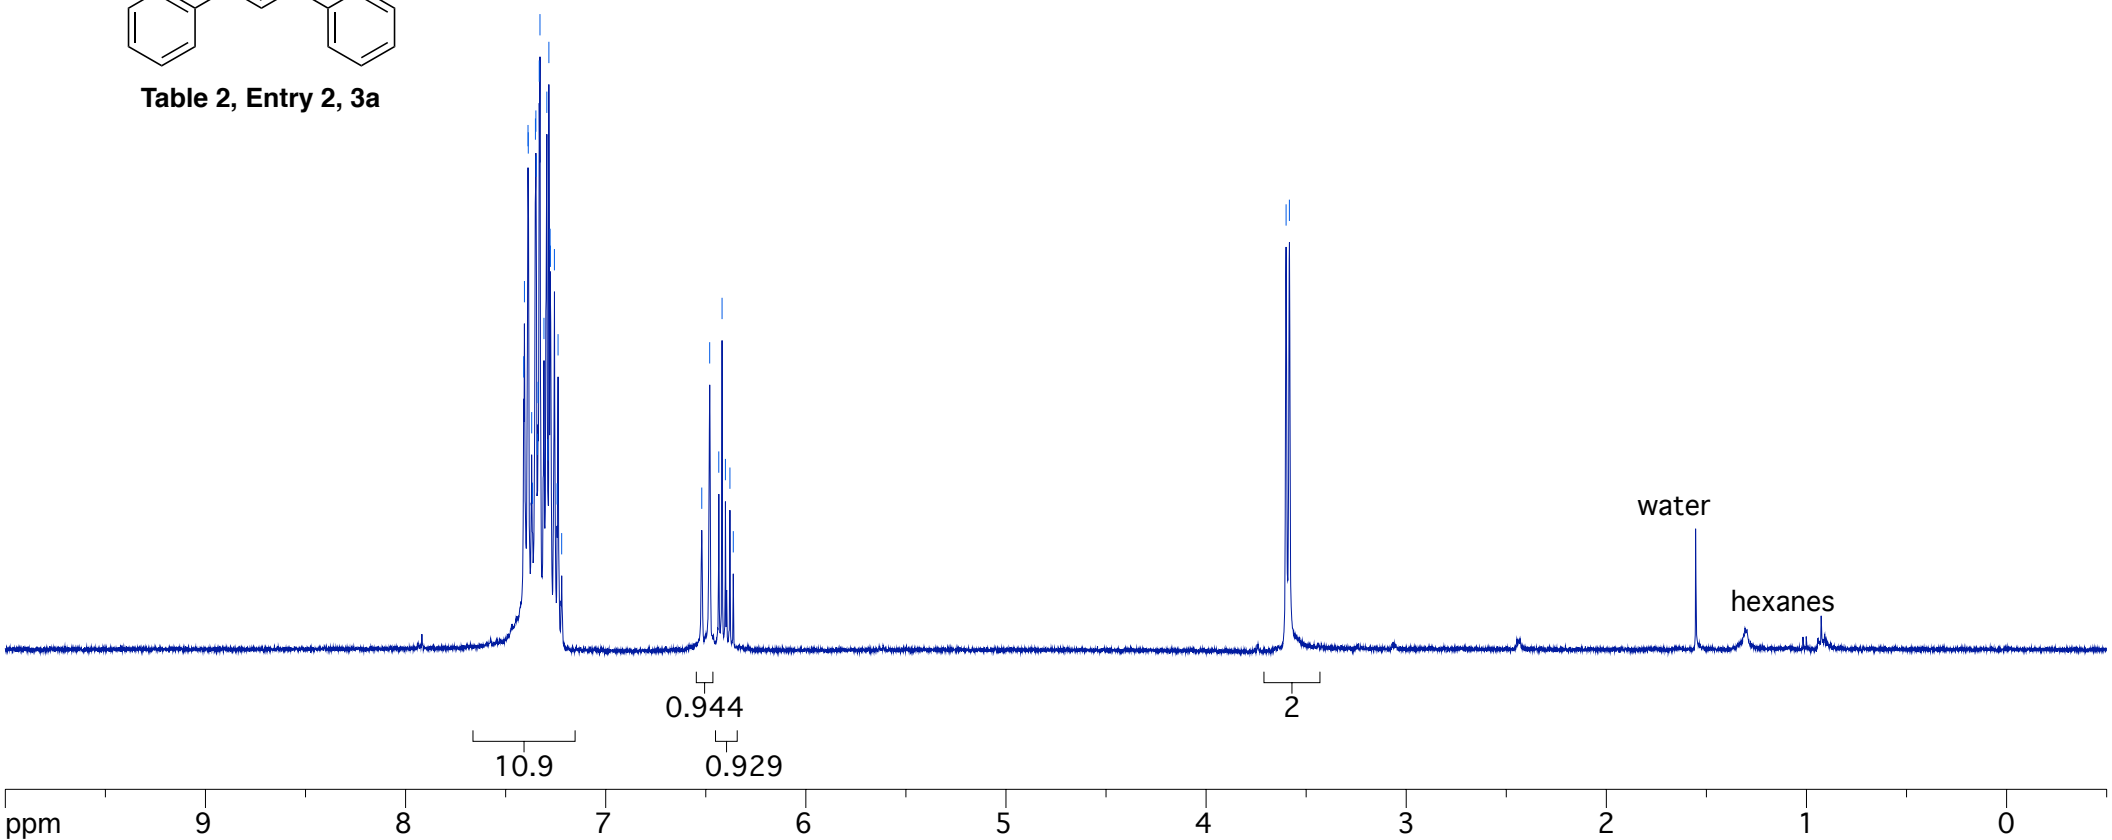

S13

$^{13}\text{C}$  NMR,  $\text{CDCl}_3$   
Pulse Sequence: zgdc  
Spectrometer Freq.: 100.62 MHz  
Spectral Width: 301.16 ppm  
Number of Scans: 423  
Relaxation Delay: 2.000 s

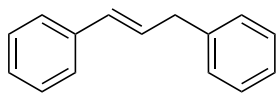

Table 2, Entry 2, 3a

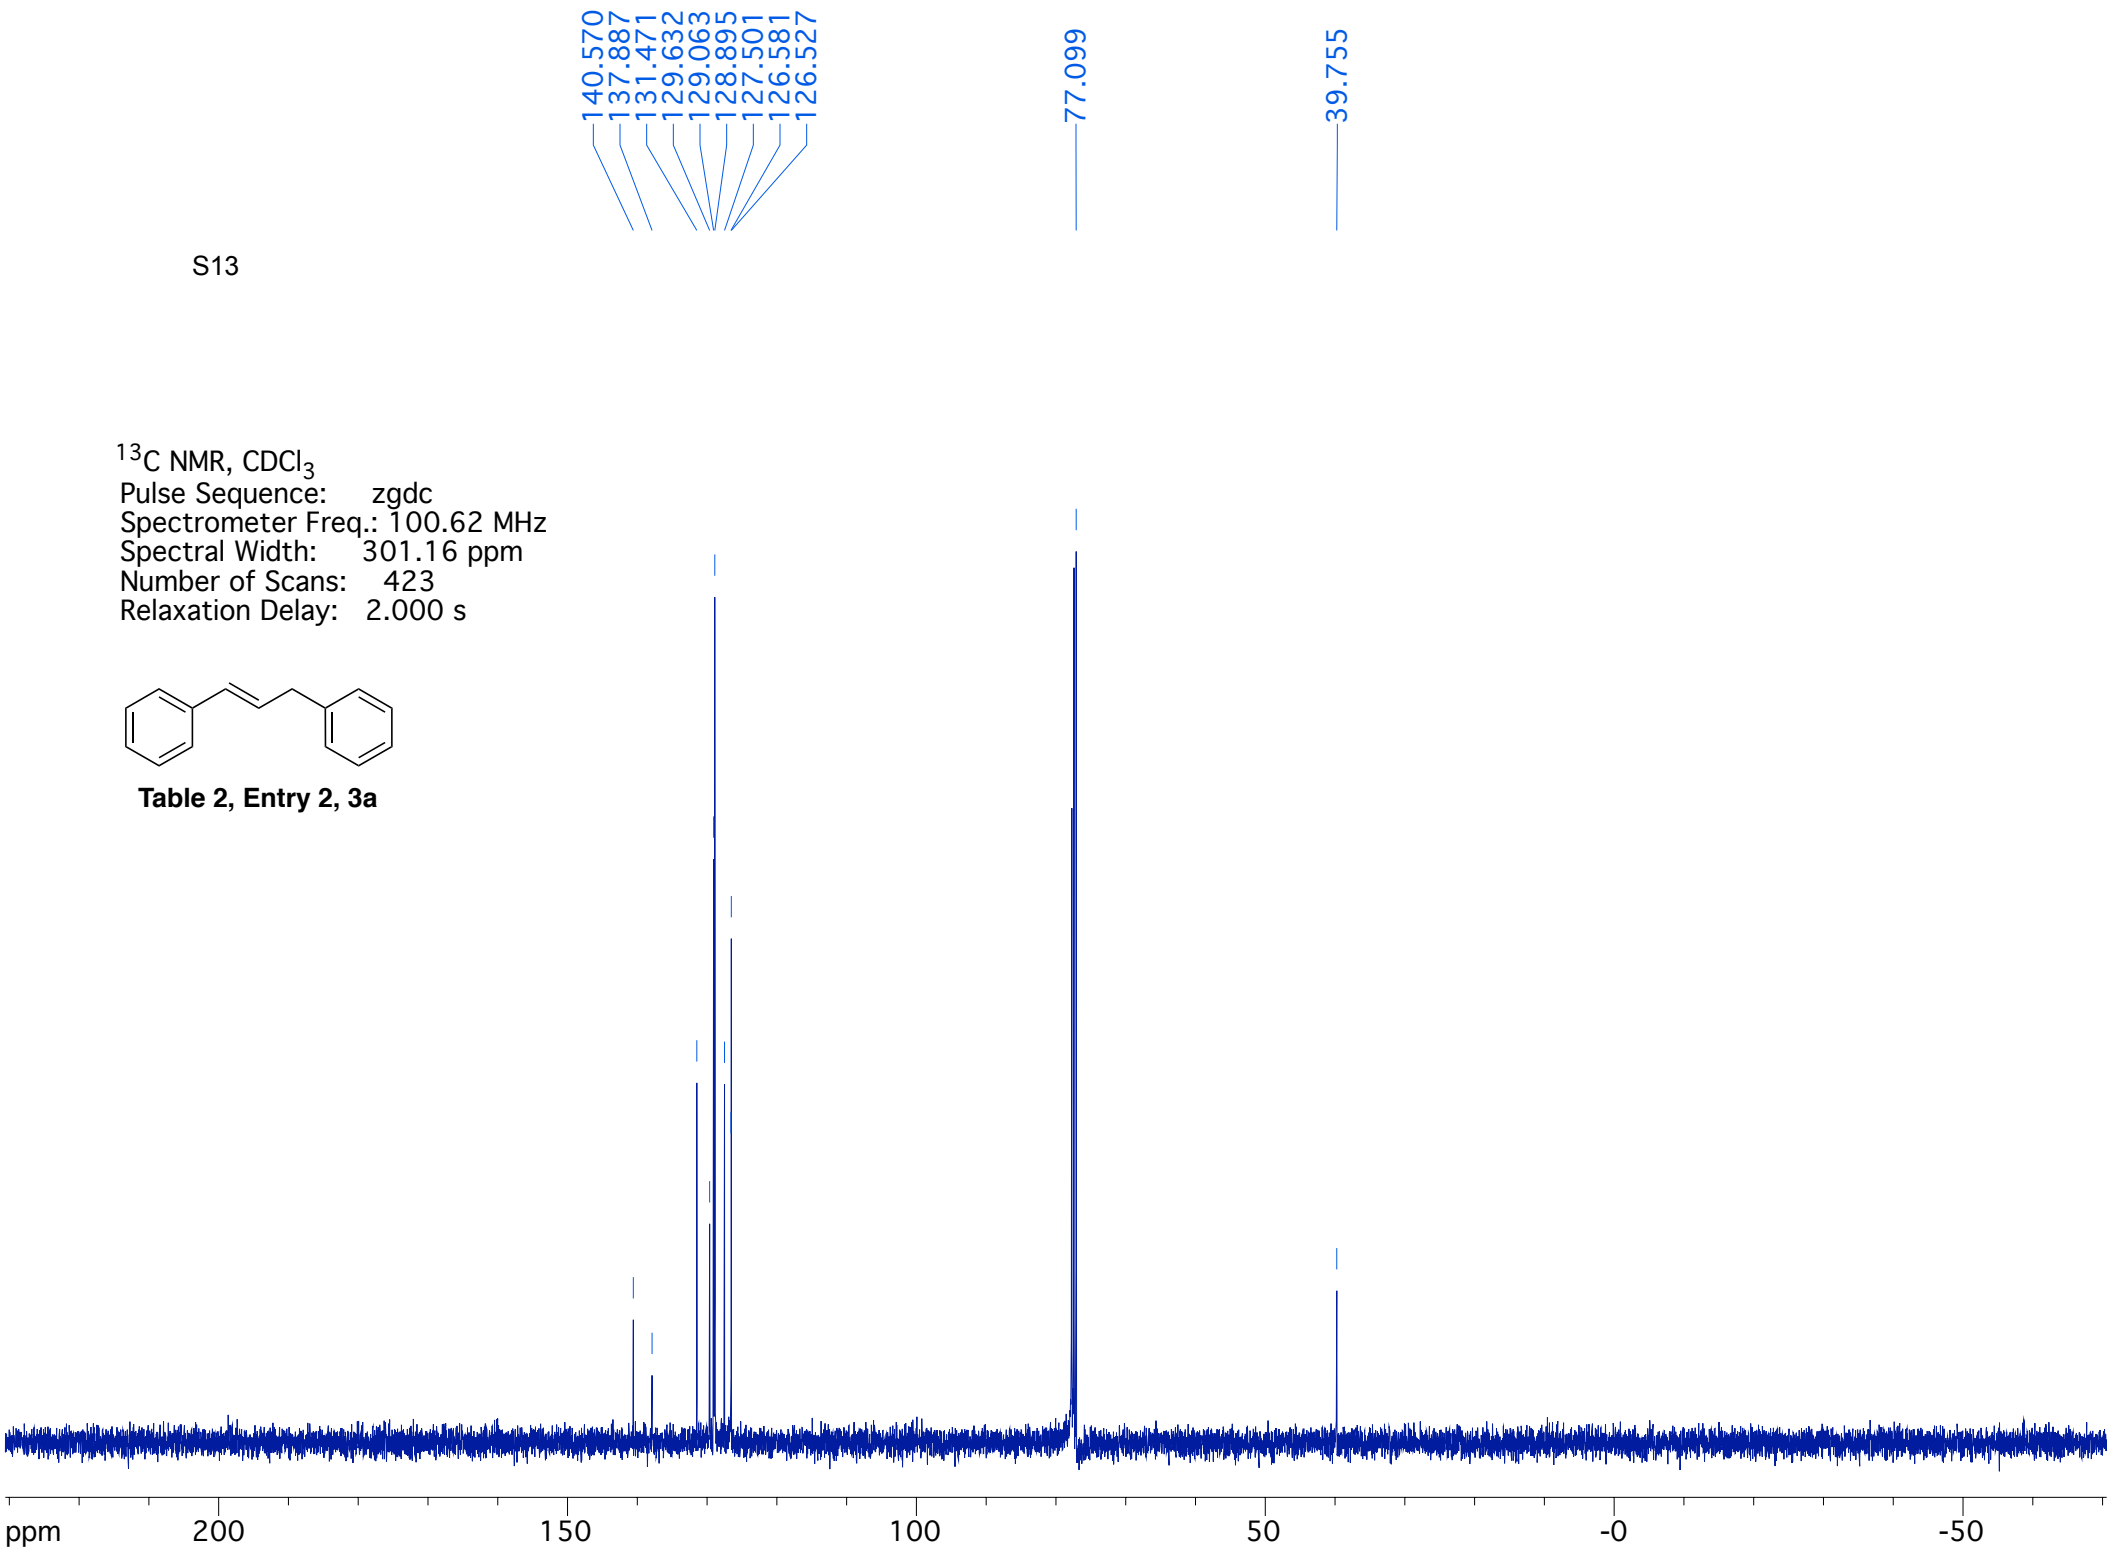



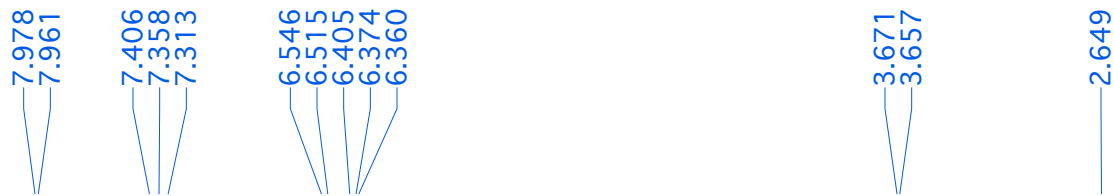

S14

$^1\text{H}$  NMR,  $\text{CDCl}_3$   
Pulse Sequence: zg  
Spectrometer Freq.: 500.13 MHz  
Spectral Width: 19.99 ppm  
Number of Scans: 16  
Relaxation Delay: 1.000 s

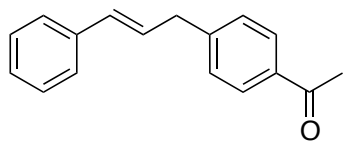

Table 2, Entry 3, 3b

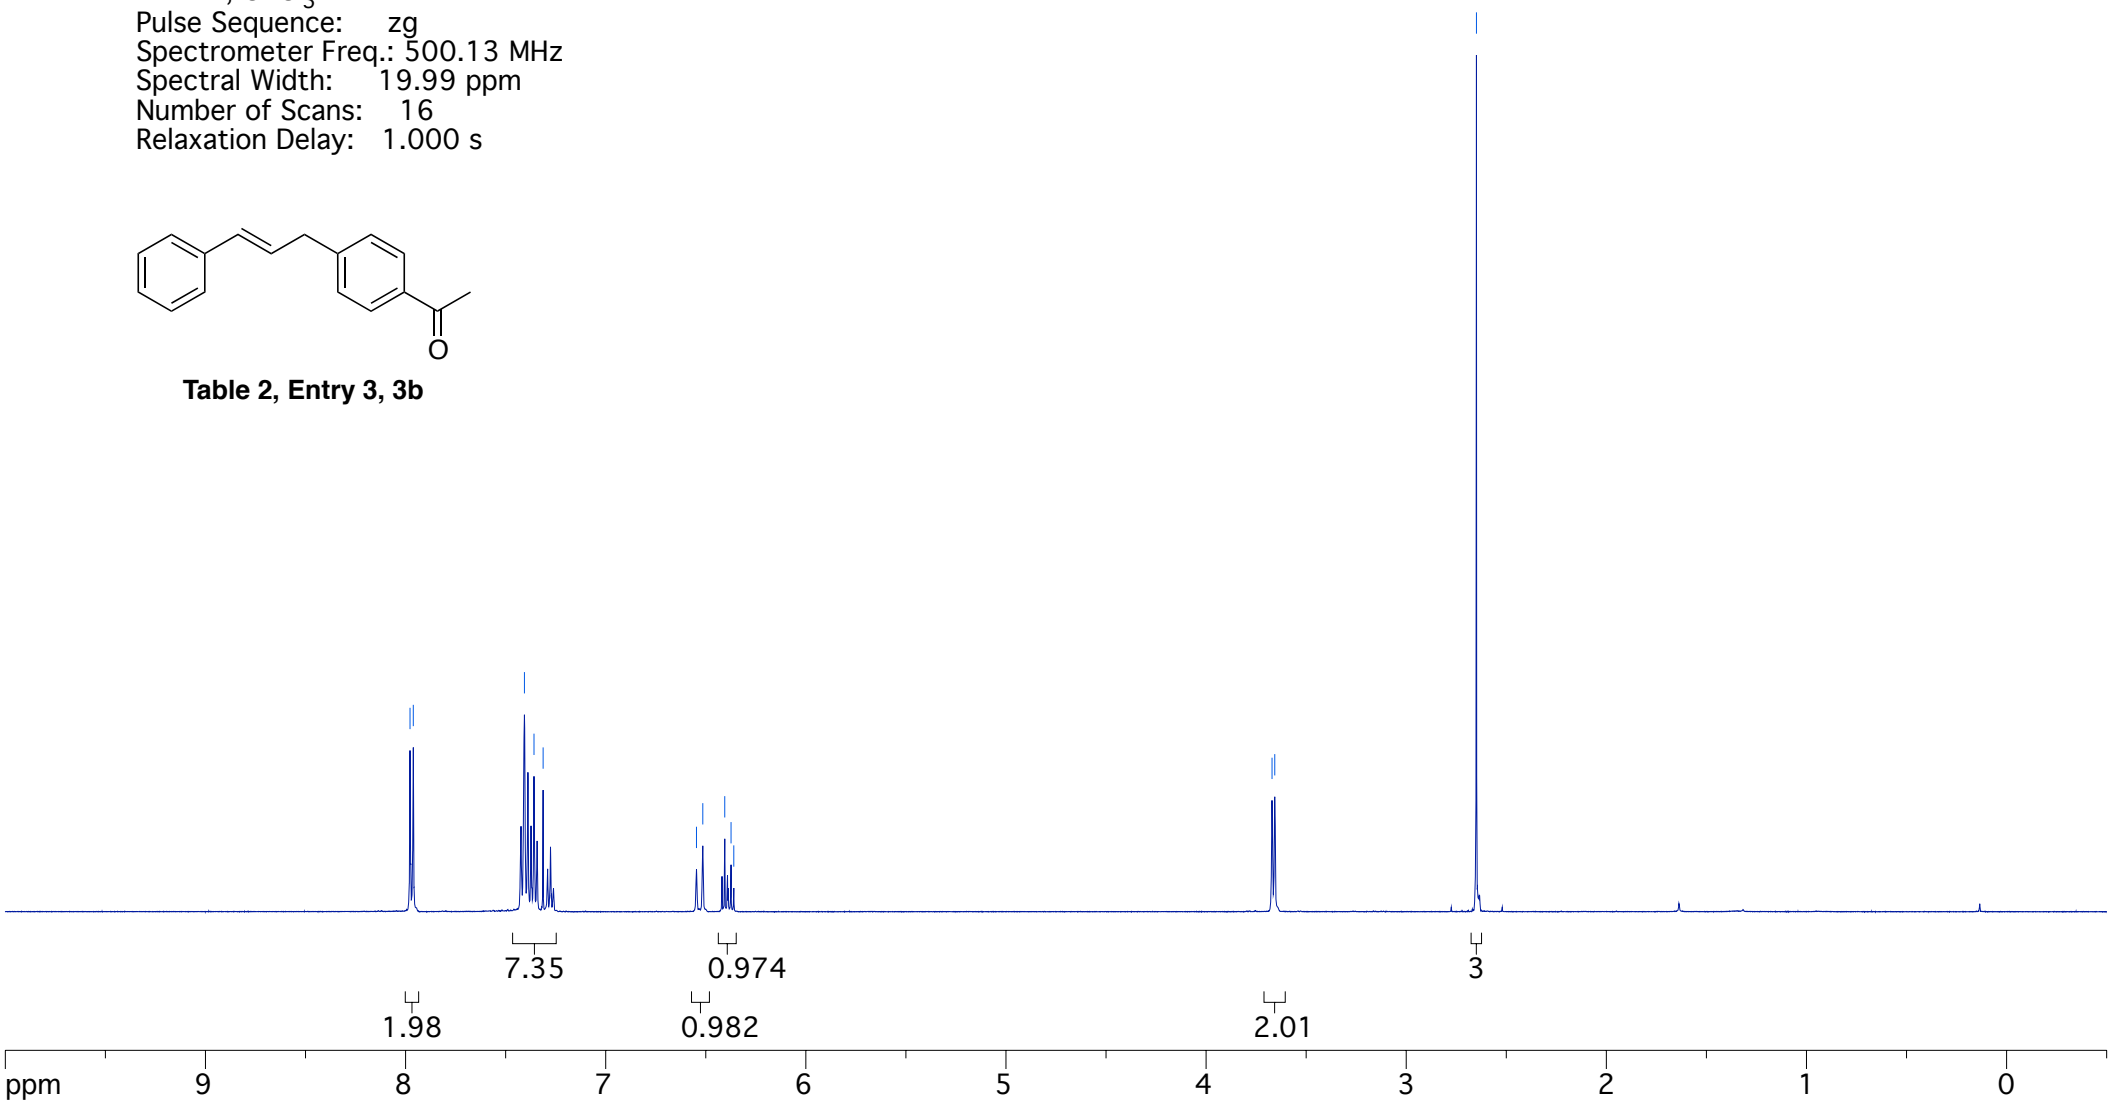

198.212  
S15  
146.304  
137.554  
135.790  
132.279  
129.281  
129.066  
128.970  
128.326  
127.757  
126.563  
77.764  
77.449  
77.133  
39.657  
27.010

<sup>13</sup>C NMR, CDCl<sub>3</sub>  
Pulse Sequence: zgdc  
Spectrometer Freq.: 100.62 MHz  
Spectral Width: 301.16 ppm  
Number of Scans: 343  
Relaxation Delay: 2.000 s

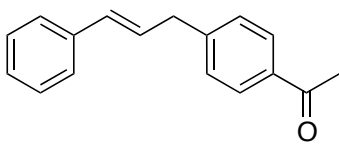

Table 2, Entry 3, 3b

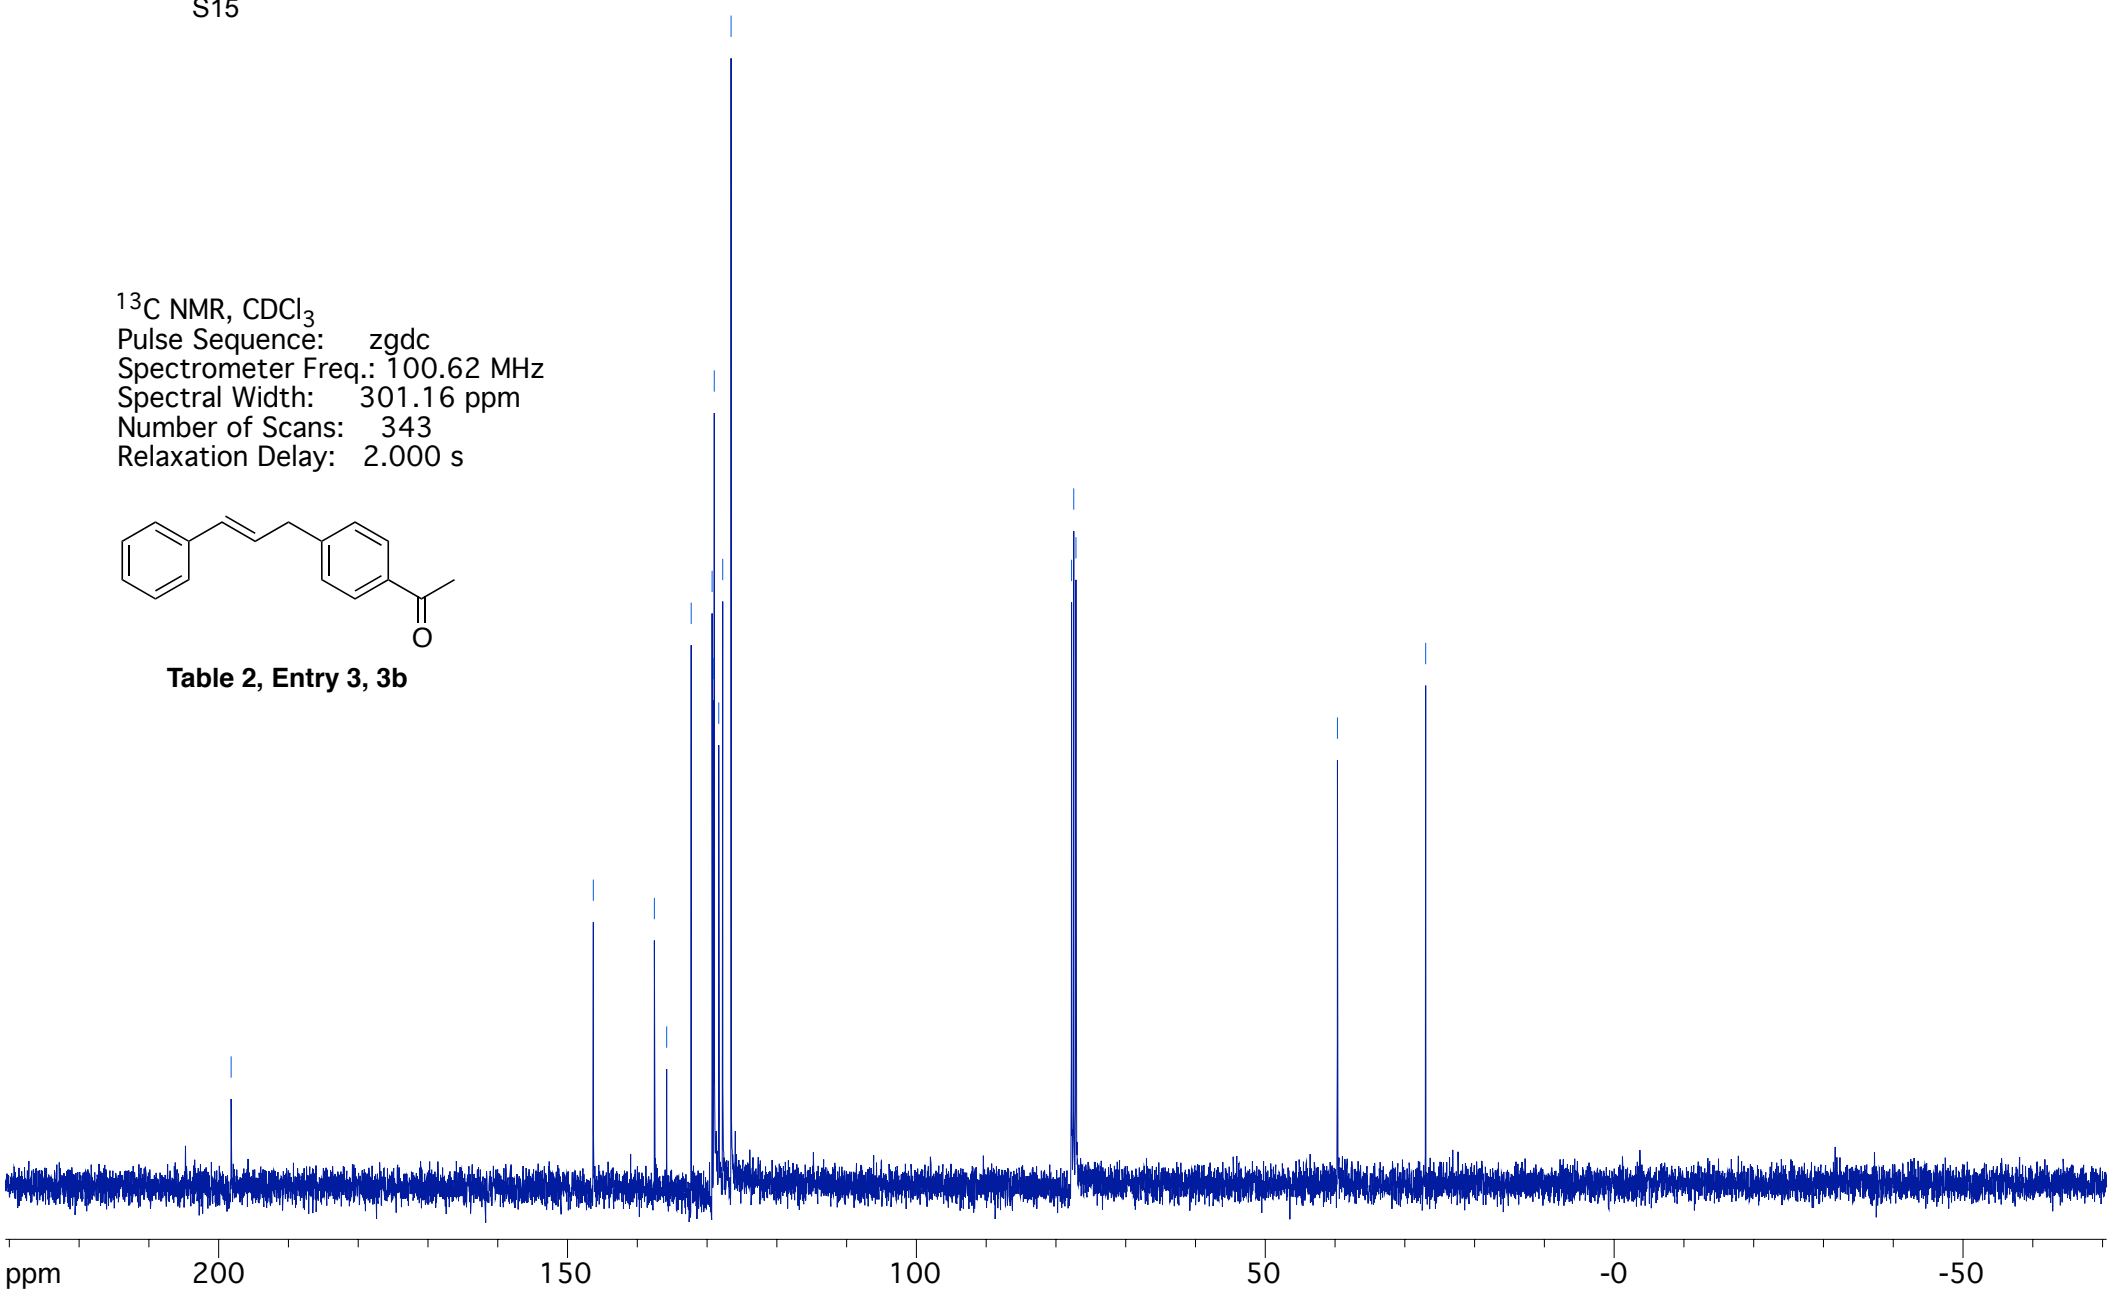

7.898  
7.881  
7.479  
7.463  
7.429  
7.426  
7.423  
7.412  
7.411  
7.407  
7.376  
7.372  
7.362  
7.359  
7.346  
7.313  
7.298  
7.295  
7.293  
7.285  
7.281  
7.277  
7.266  
6.559  
6.528  
6.420  
6.406  
6.393  
6.389  
6.375  
6.361

3.695  
3.682

S16

<sup>1</sup>H NMR, CDCl<sub>3</sub>  
Pulse Sequence: zg  
Spectrometer Freq.: 500.13 MHz  
Spectral Width: 19.99 ppm  
Number of Scans: 16  
Relaxation Delay: 1.000 s

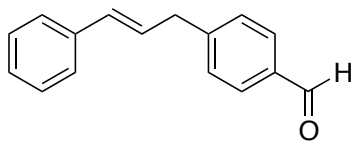

Table 2, Entry 4, 3c

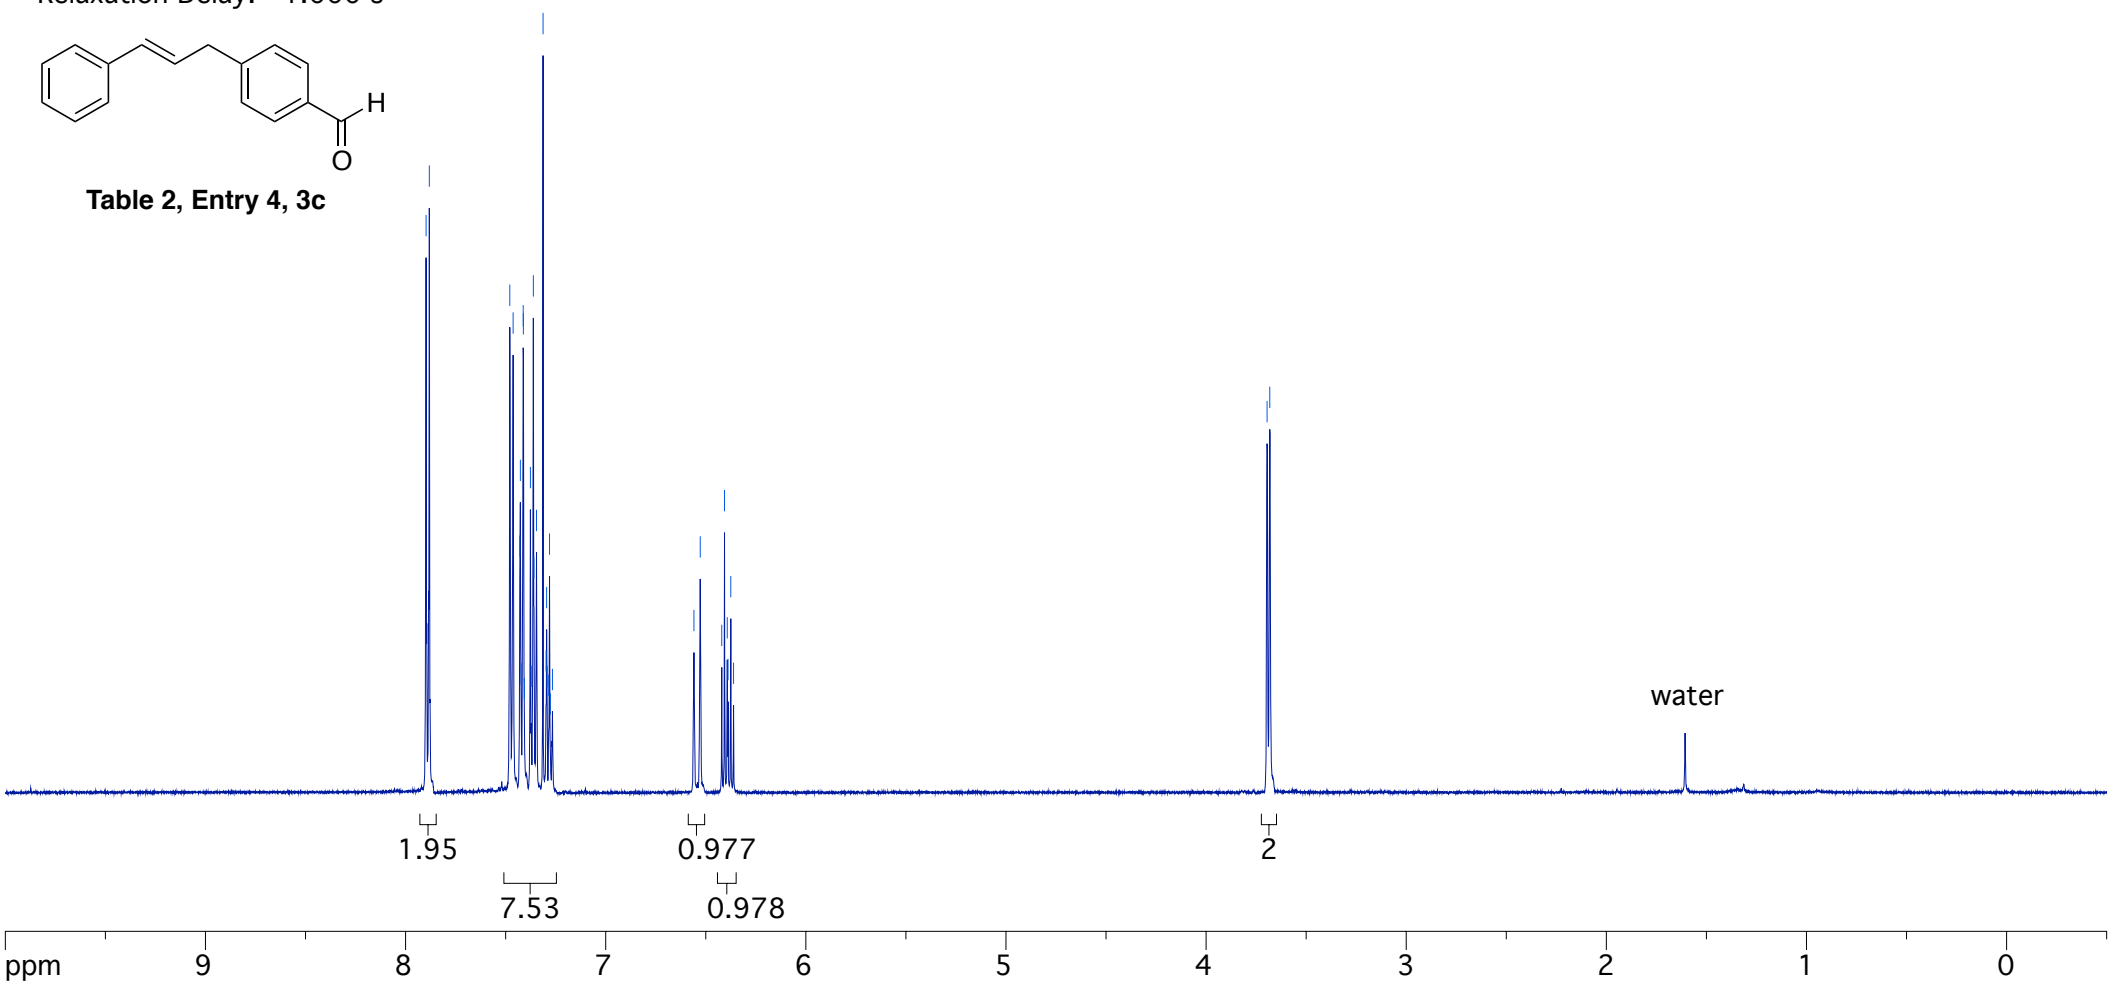

S17

192.029

147.579  
137.093  
134.820  
132.138  
130.098  
129.354  
128.608  
127.624  
127.450  
126.200

77.337  
77.082  
76.827

39.462

$^{13}\text{C}$  NMR,  $\text{CDCl}_3$   
Pulse Sequence: zgdc  
Spectrometer Freq.: 125.77 MHz  
Spectral Width: 301.18 ppm  
Number of Scans: 278  
Relaxation Delay: 2.000 s

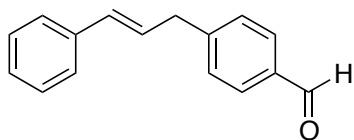

Table 2, Entry 4, 3c

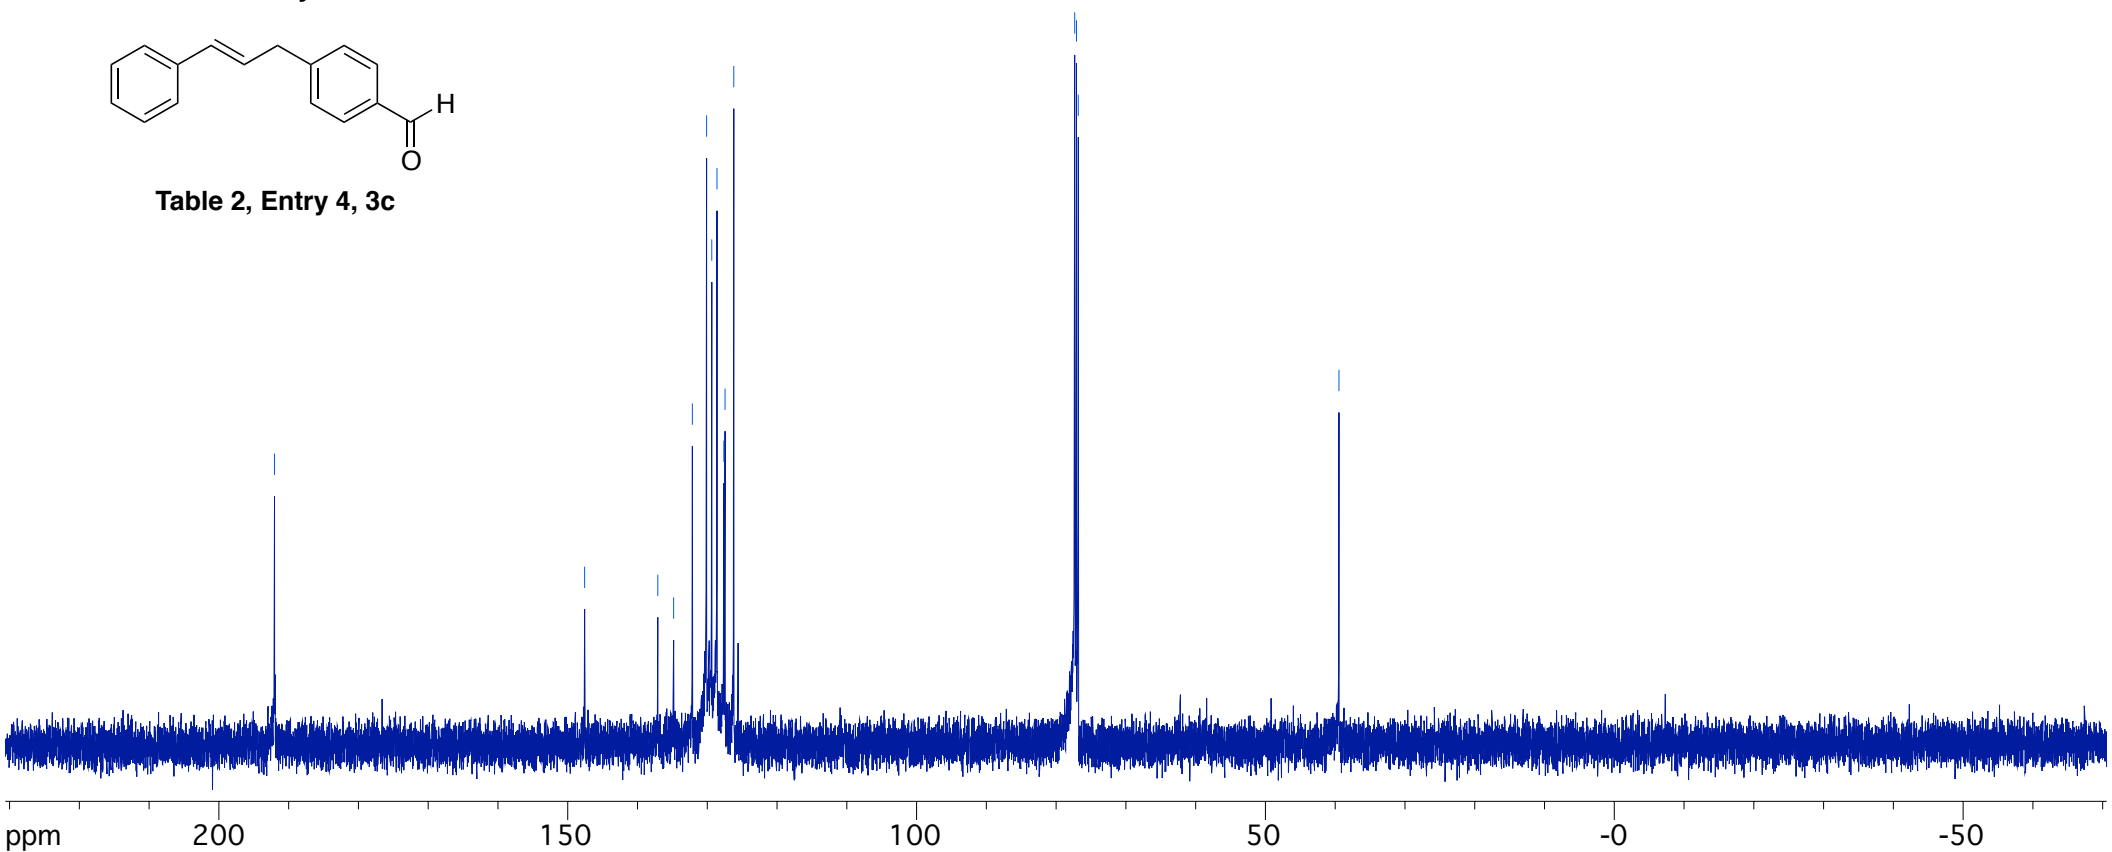

S18

7.647  
7.631  
7.627  
7.344  
7.341  
7.324  
7.321  
7.308  
7.228  
7.223  
7.215  
7.213  
7.206  
7.119  
7.098  
6.999  
6.994  
6.982  
6.978  
6.415  
6.414  
6.395  
6.394  
6.375  
6.314  
6.298  
6.281  
6.258

3.479  
3.463

2.380

<sup>1</sup>H NMR, CDCl<sub>3</sub>  
Pulse Sequence: zg  
Spectrometer Freq.: 400.13 MHz  
Spectral Width: 20.42 ppm  
Number of Scans: 1  
Relaxation Delay: 1.000 s

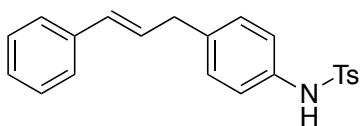

Table 2, Entry 5, 3d

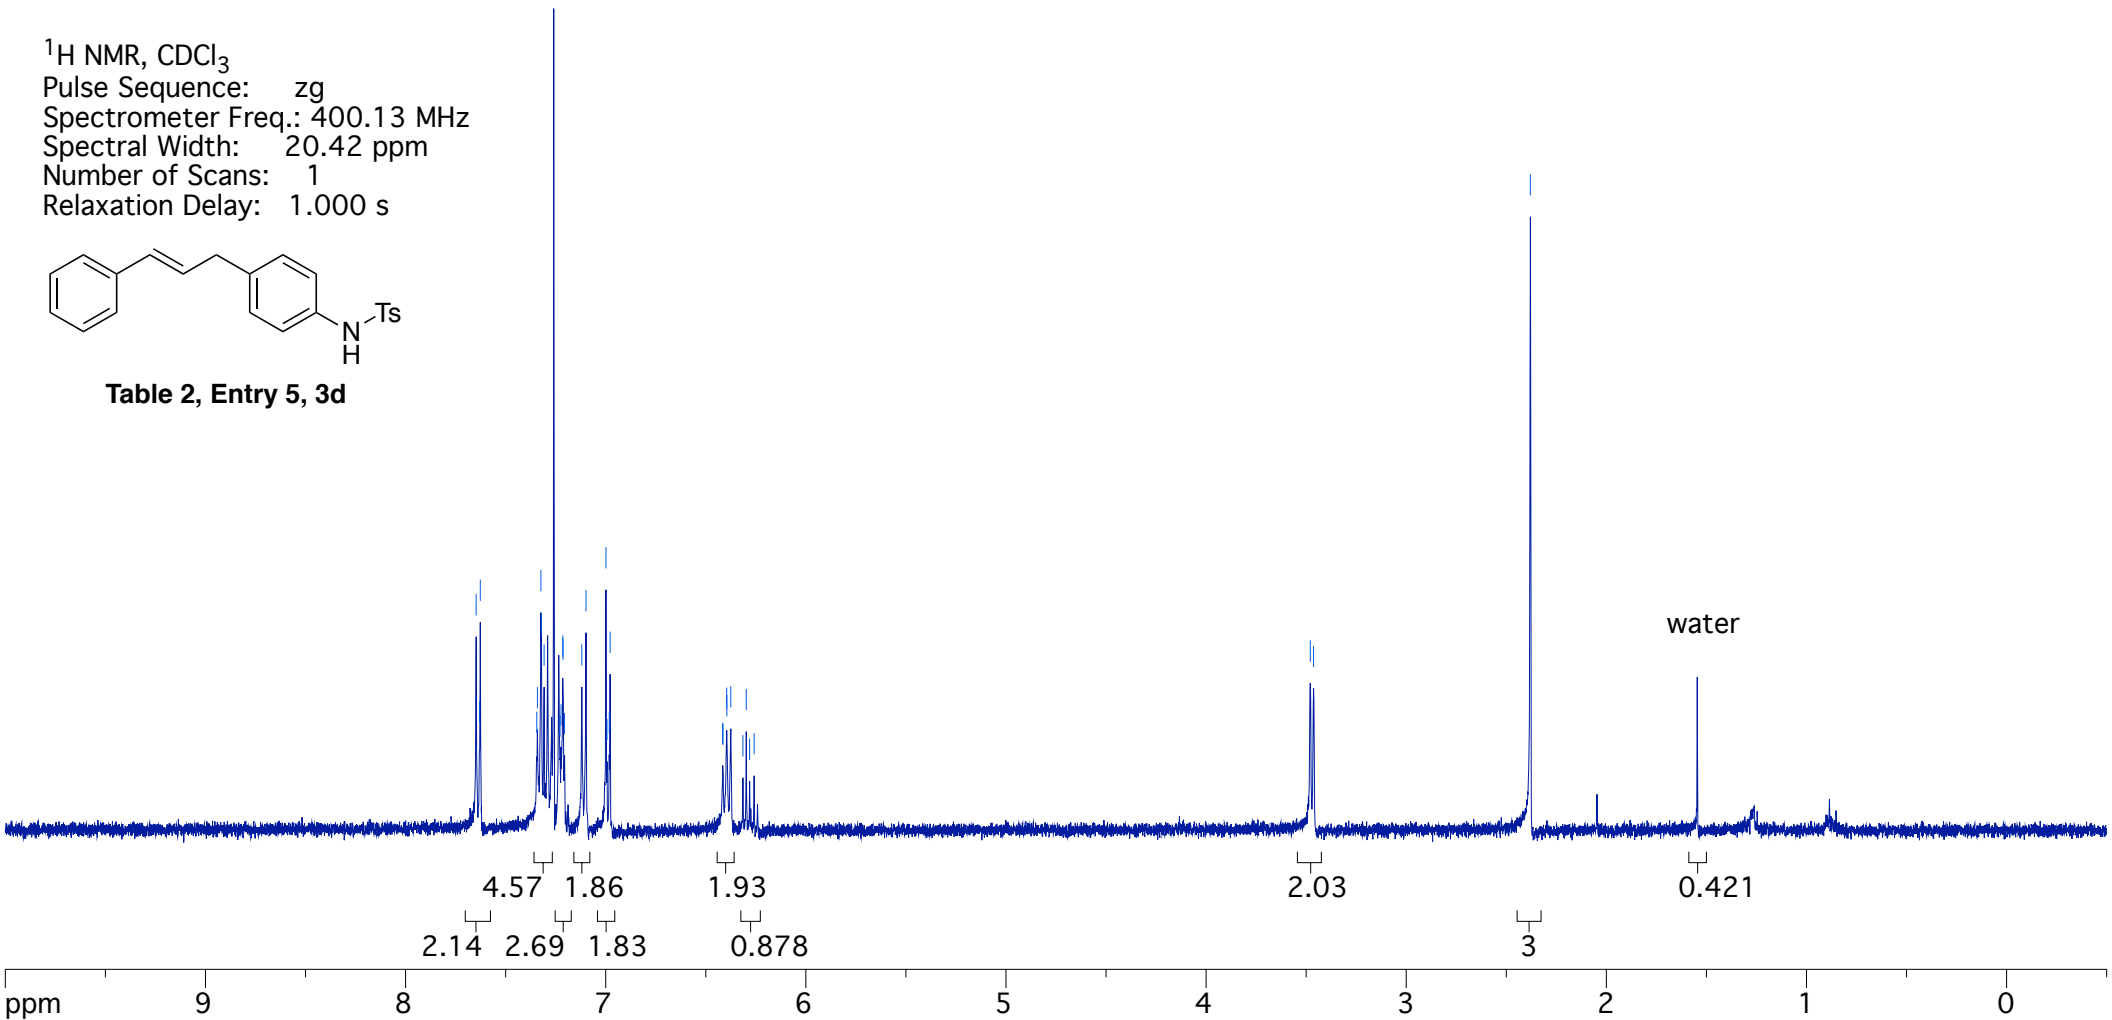

S19

$^{13}\text{C}$  NMR,  $\text{CDCl}_3$   
Pulse Sequence: zgdc  
Spectrometer Freq.: 125.77 MHz  
Spectral Width: 301.18 ppm  
Number of Scans: 14925  
Relaxation Delay: 2.000 s

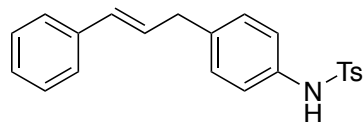

Table 2, Entry 5, 3d

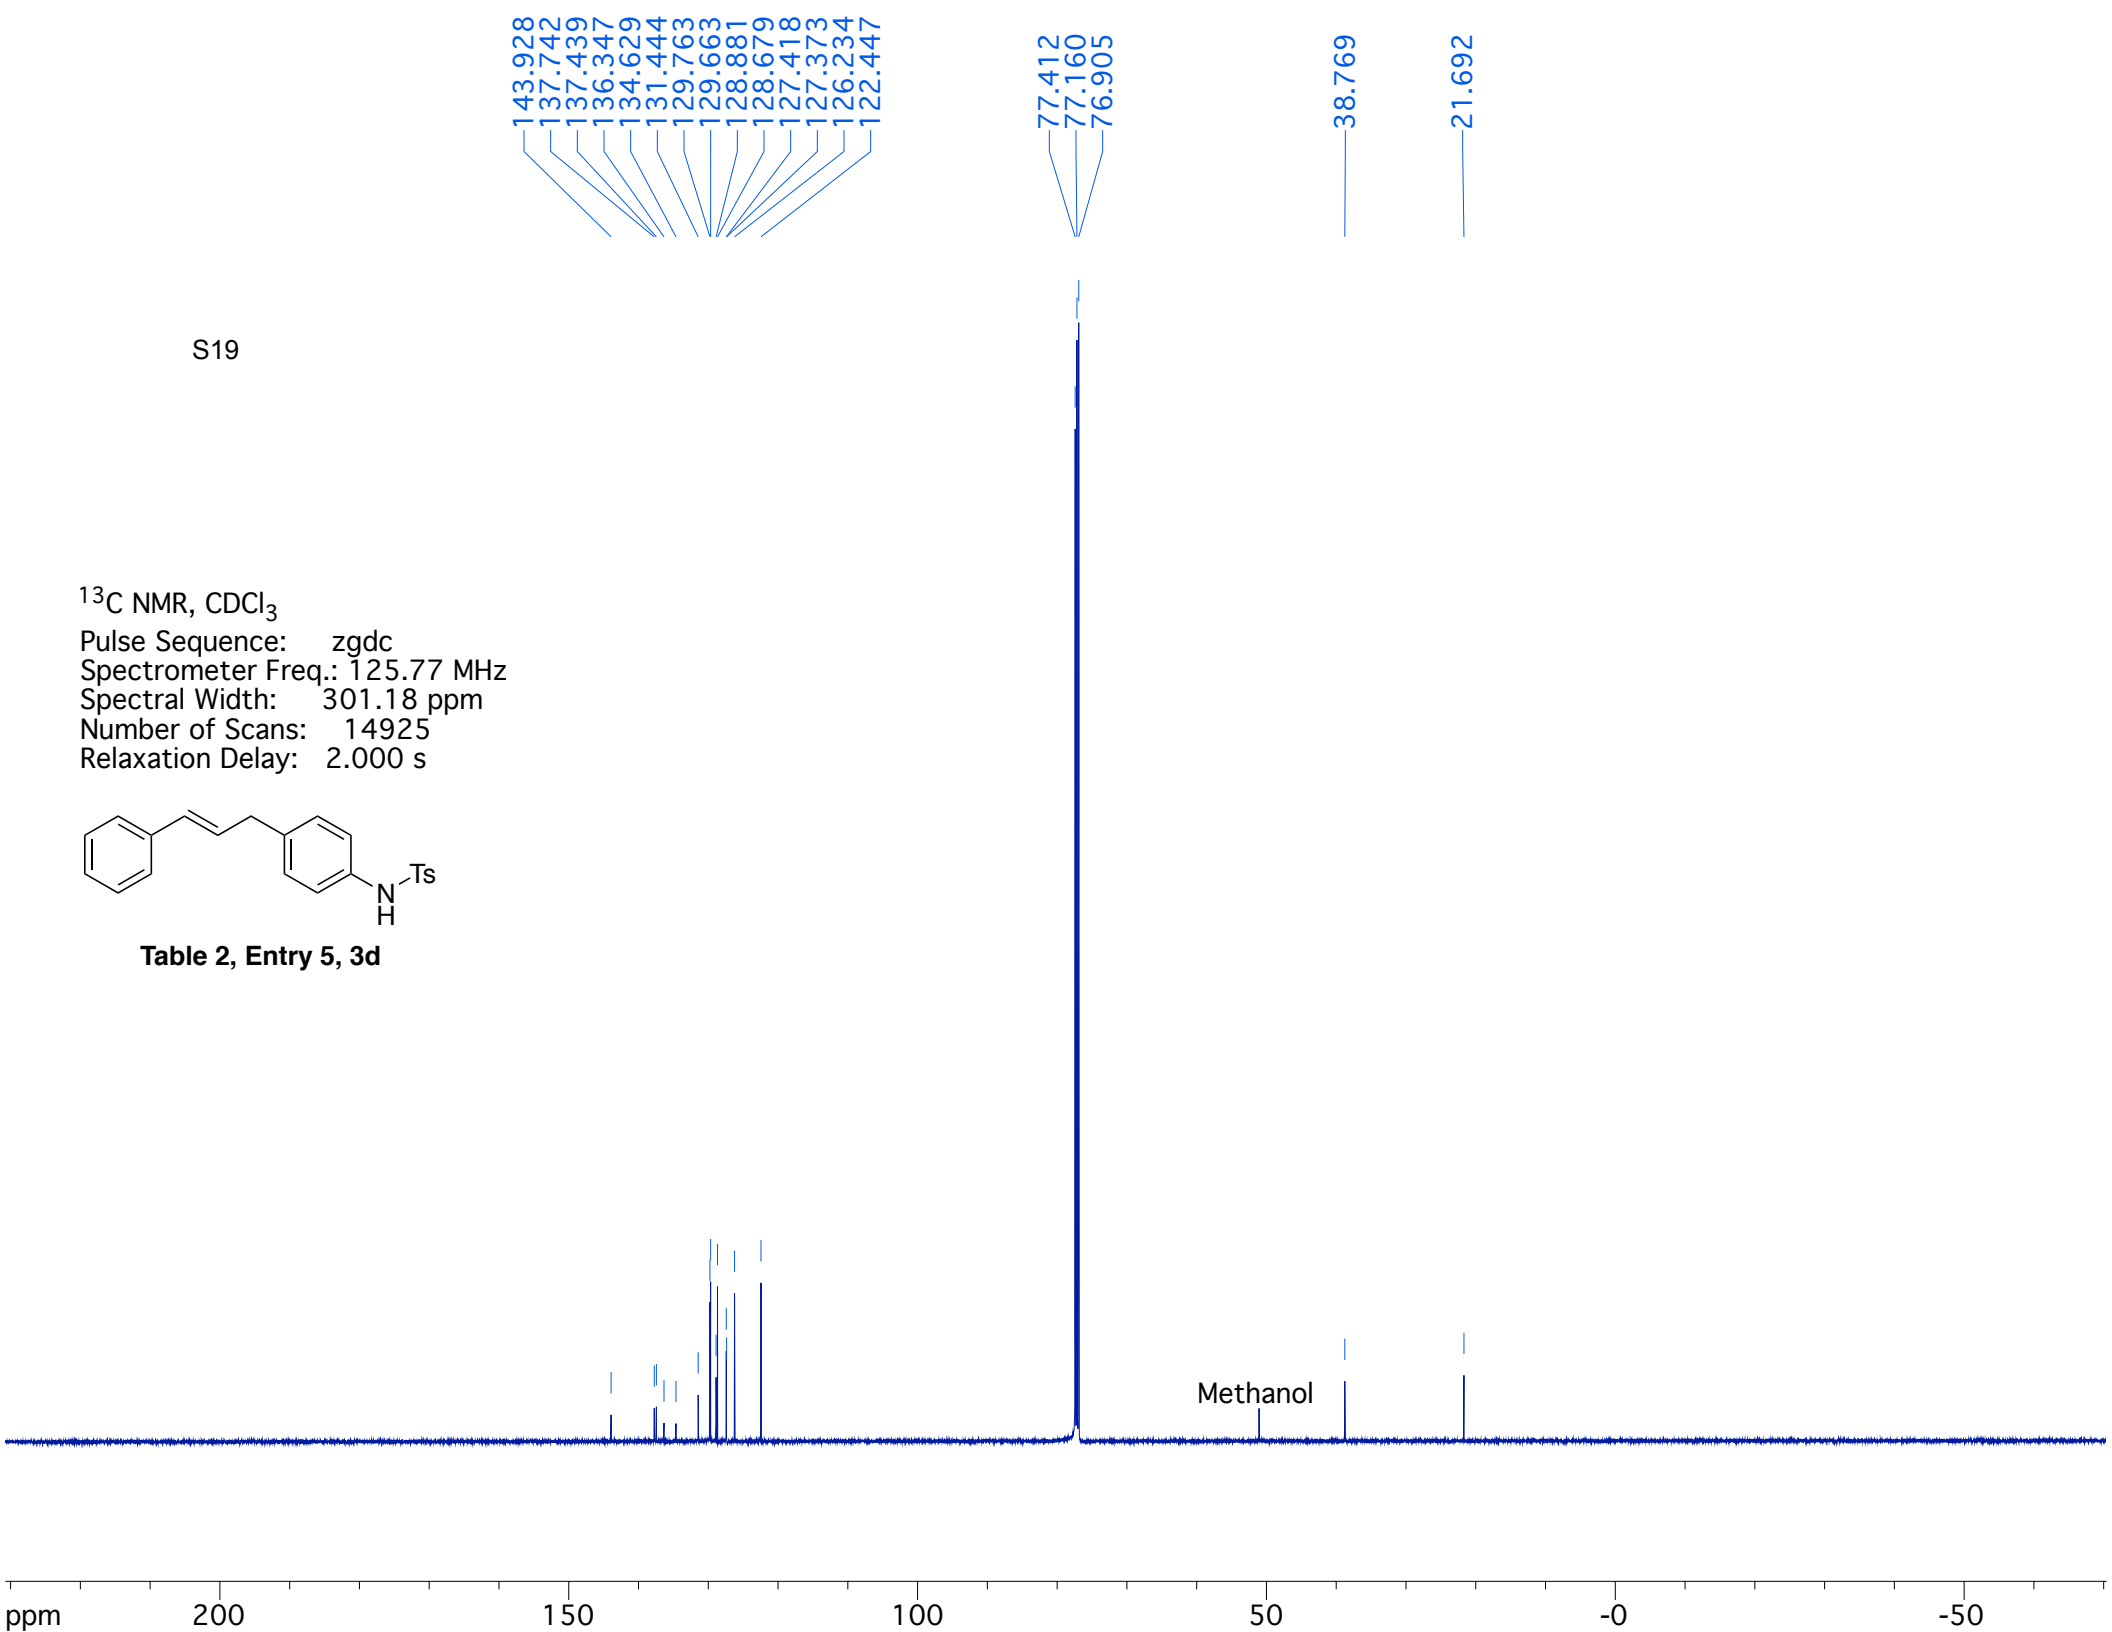

7.842  
7.541  
7.537  
7.528  
7.524  
7.397  
7.394  
7.380  
7.345  
7.330  
7.313  
7.296  
7.288  
7.260  
7.246  
7.231  
6.497  
6.465  
6.383  
6.370  
6.356  
6.352  
6.338  
6.324

3.585  
3.571

S20

<sup>1</sup>H NMR, CDCl<sub>3</sub>  
Pulse Sequence: zg  
Spectrometer Freq.: 500.13 MHz  
Spectral Width: 19.99 ppm  
Number of Scans: 16  
Relaxation Delay: 1.000 s

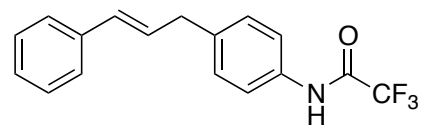

Table 2, Entry 6, 3e

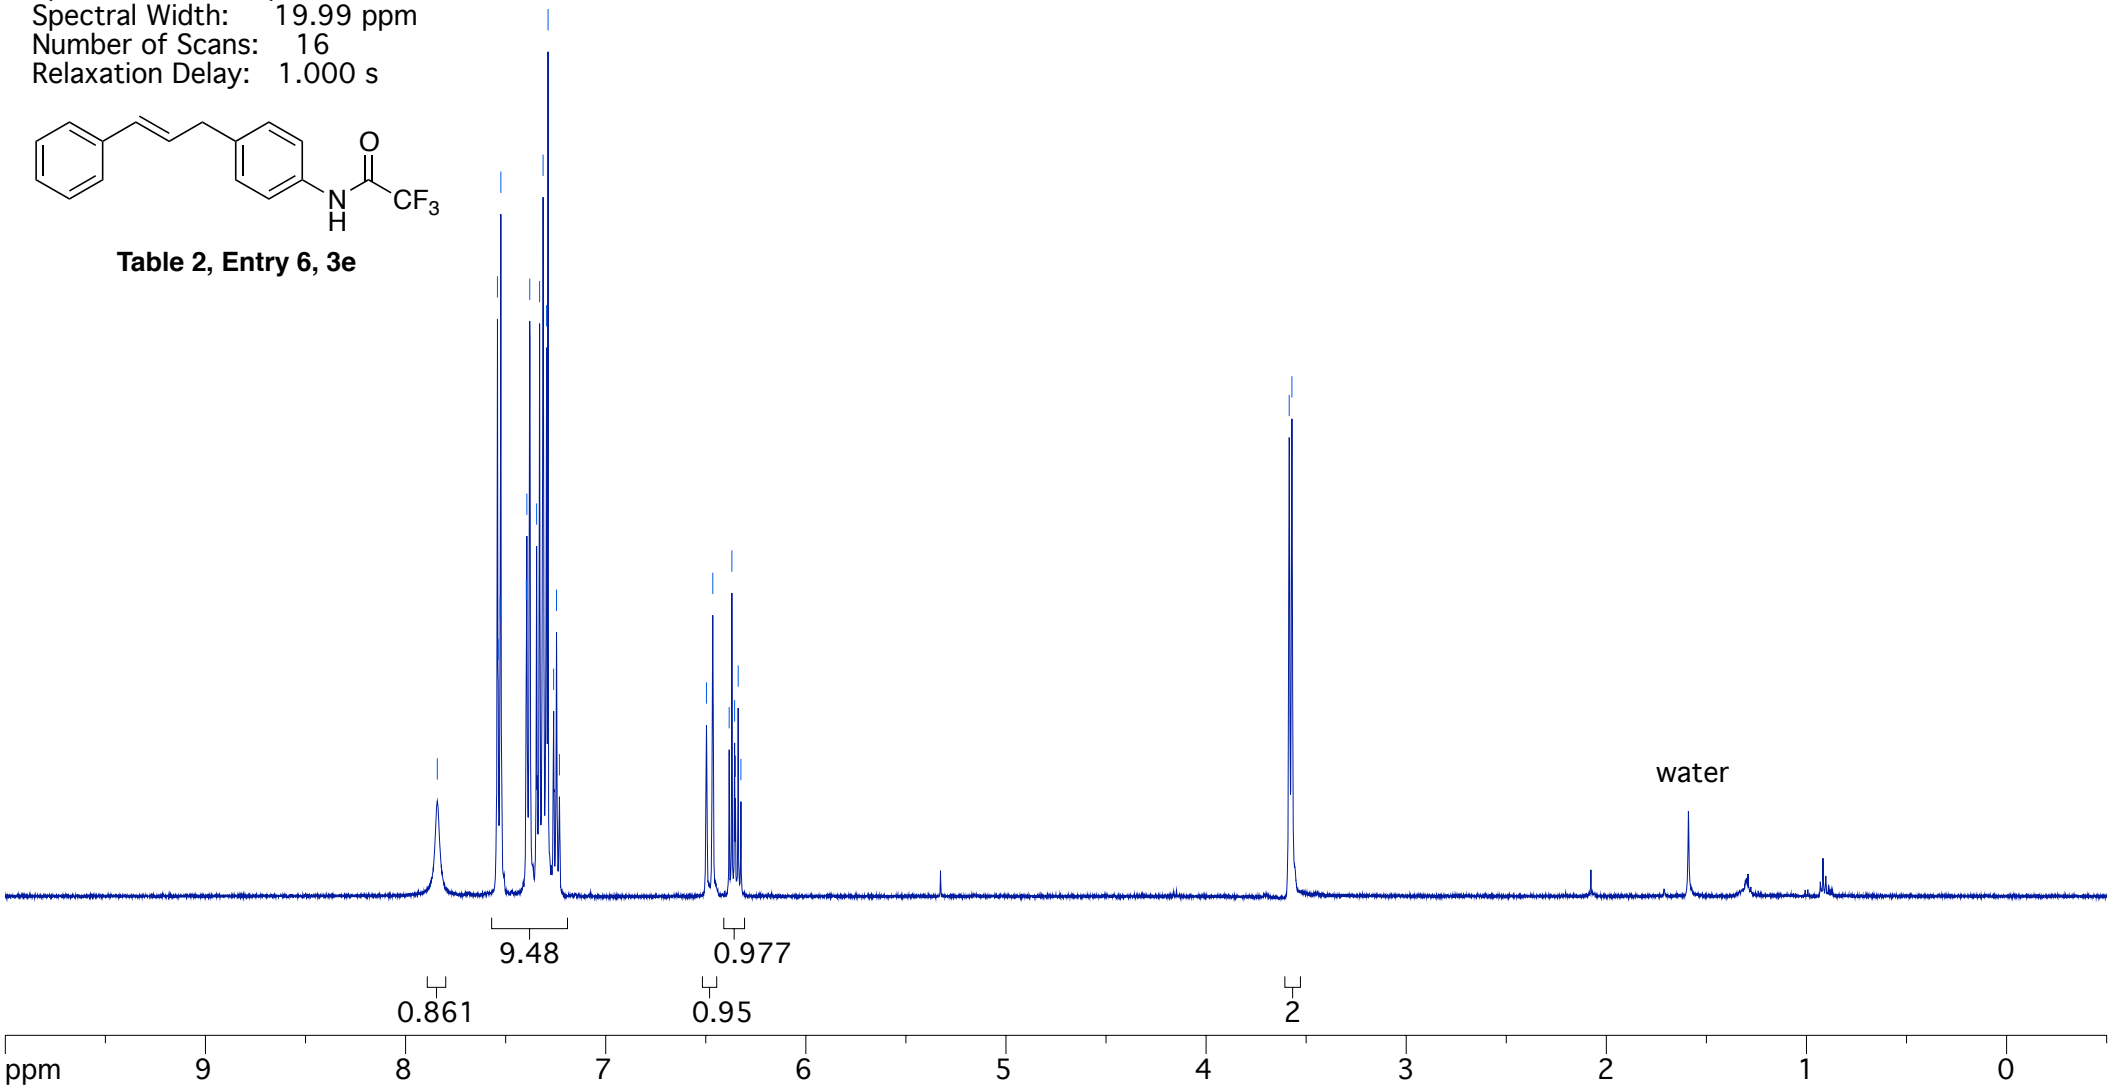

S21

$^{13}\text{C}$  NMR,  $\text{CDCl}_3$   
Pulse Sequence: zgdc  
Spectrometer Freq.: 125.77 MHz  
Spectral Width: 301.18 ppm  
Number of Scans: 933  
Relaxation Delay: 2.000 s

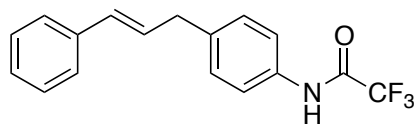

Table 2, Entry 6, 3e

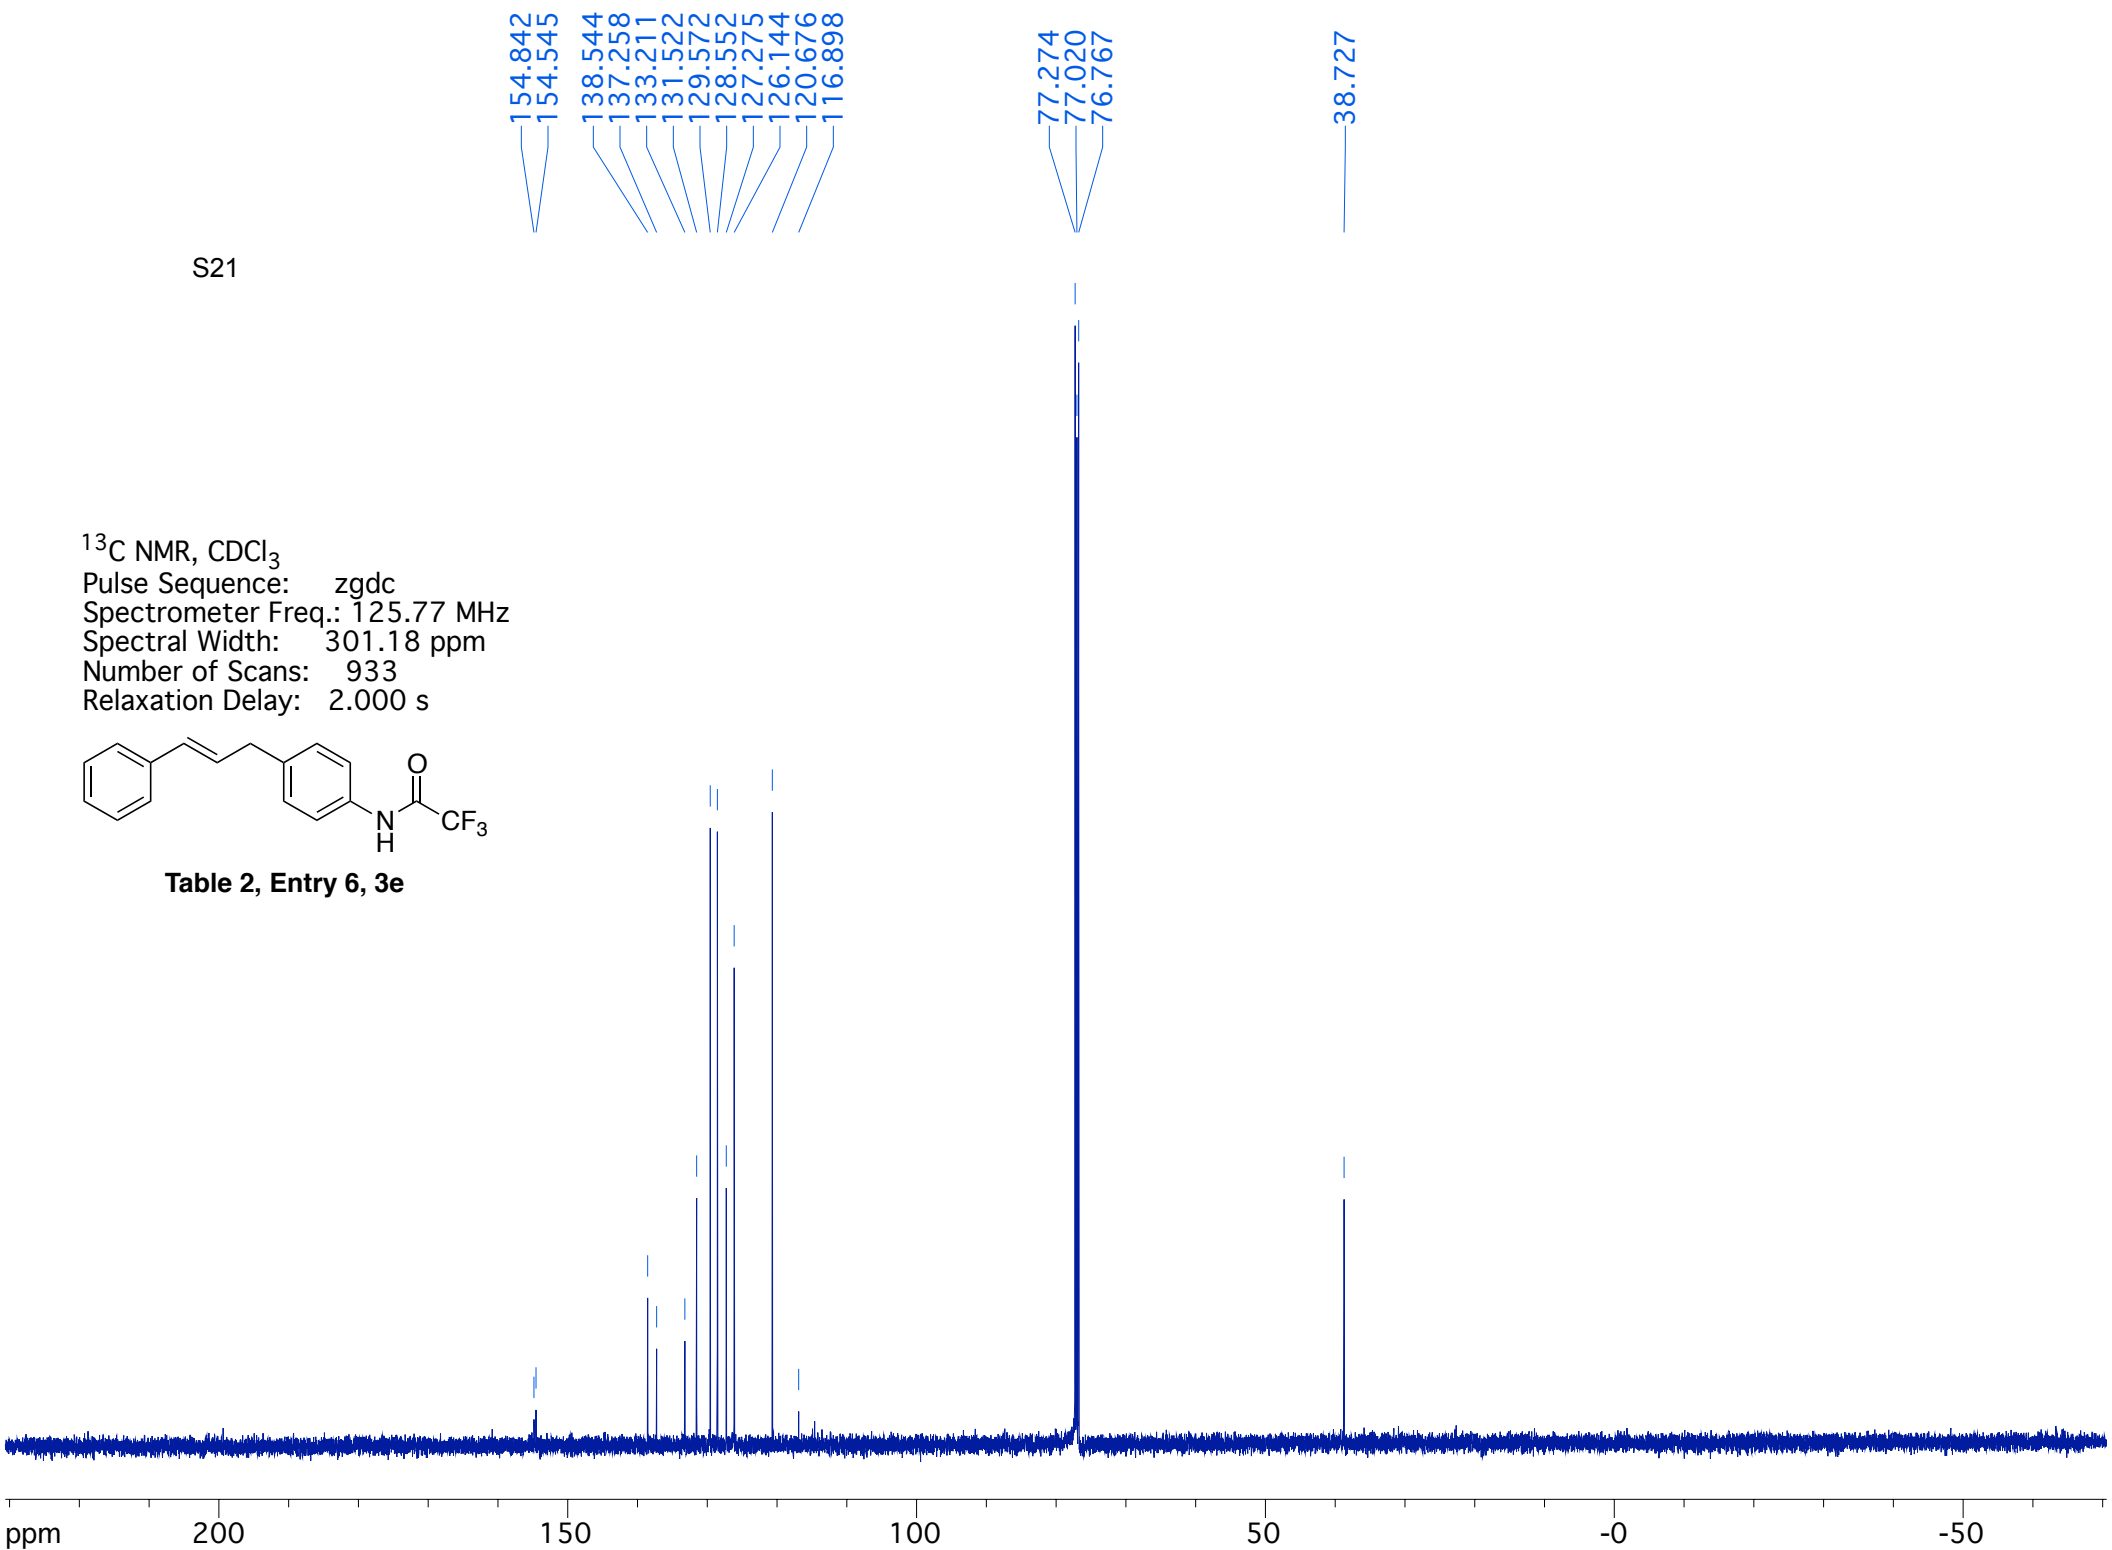



-76.152

S22

$^{19}\text{F}$  NMR,  $\text{CDCl}_3$   
Pulse Sequence: zg  
Spectrometer Freq.: 376.50 MHz  
Spectral Width: 199.70 ppm  
Number of Scans: 4  
Relaxation Delay: 1.000 s

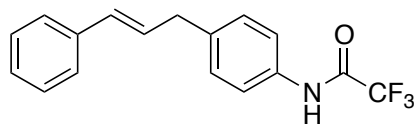

**Table 2, Entry 6, 3e**

ppm

50

-0

-50

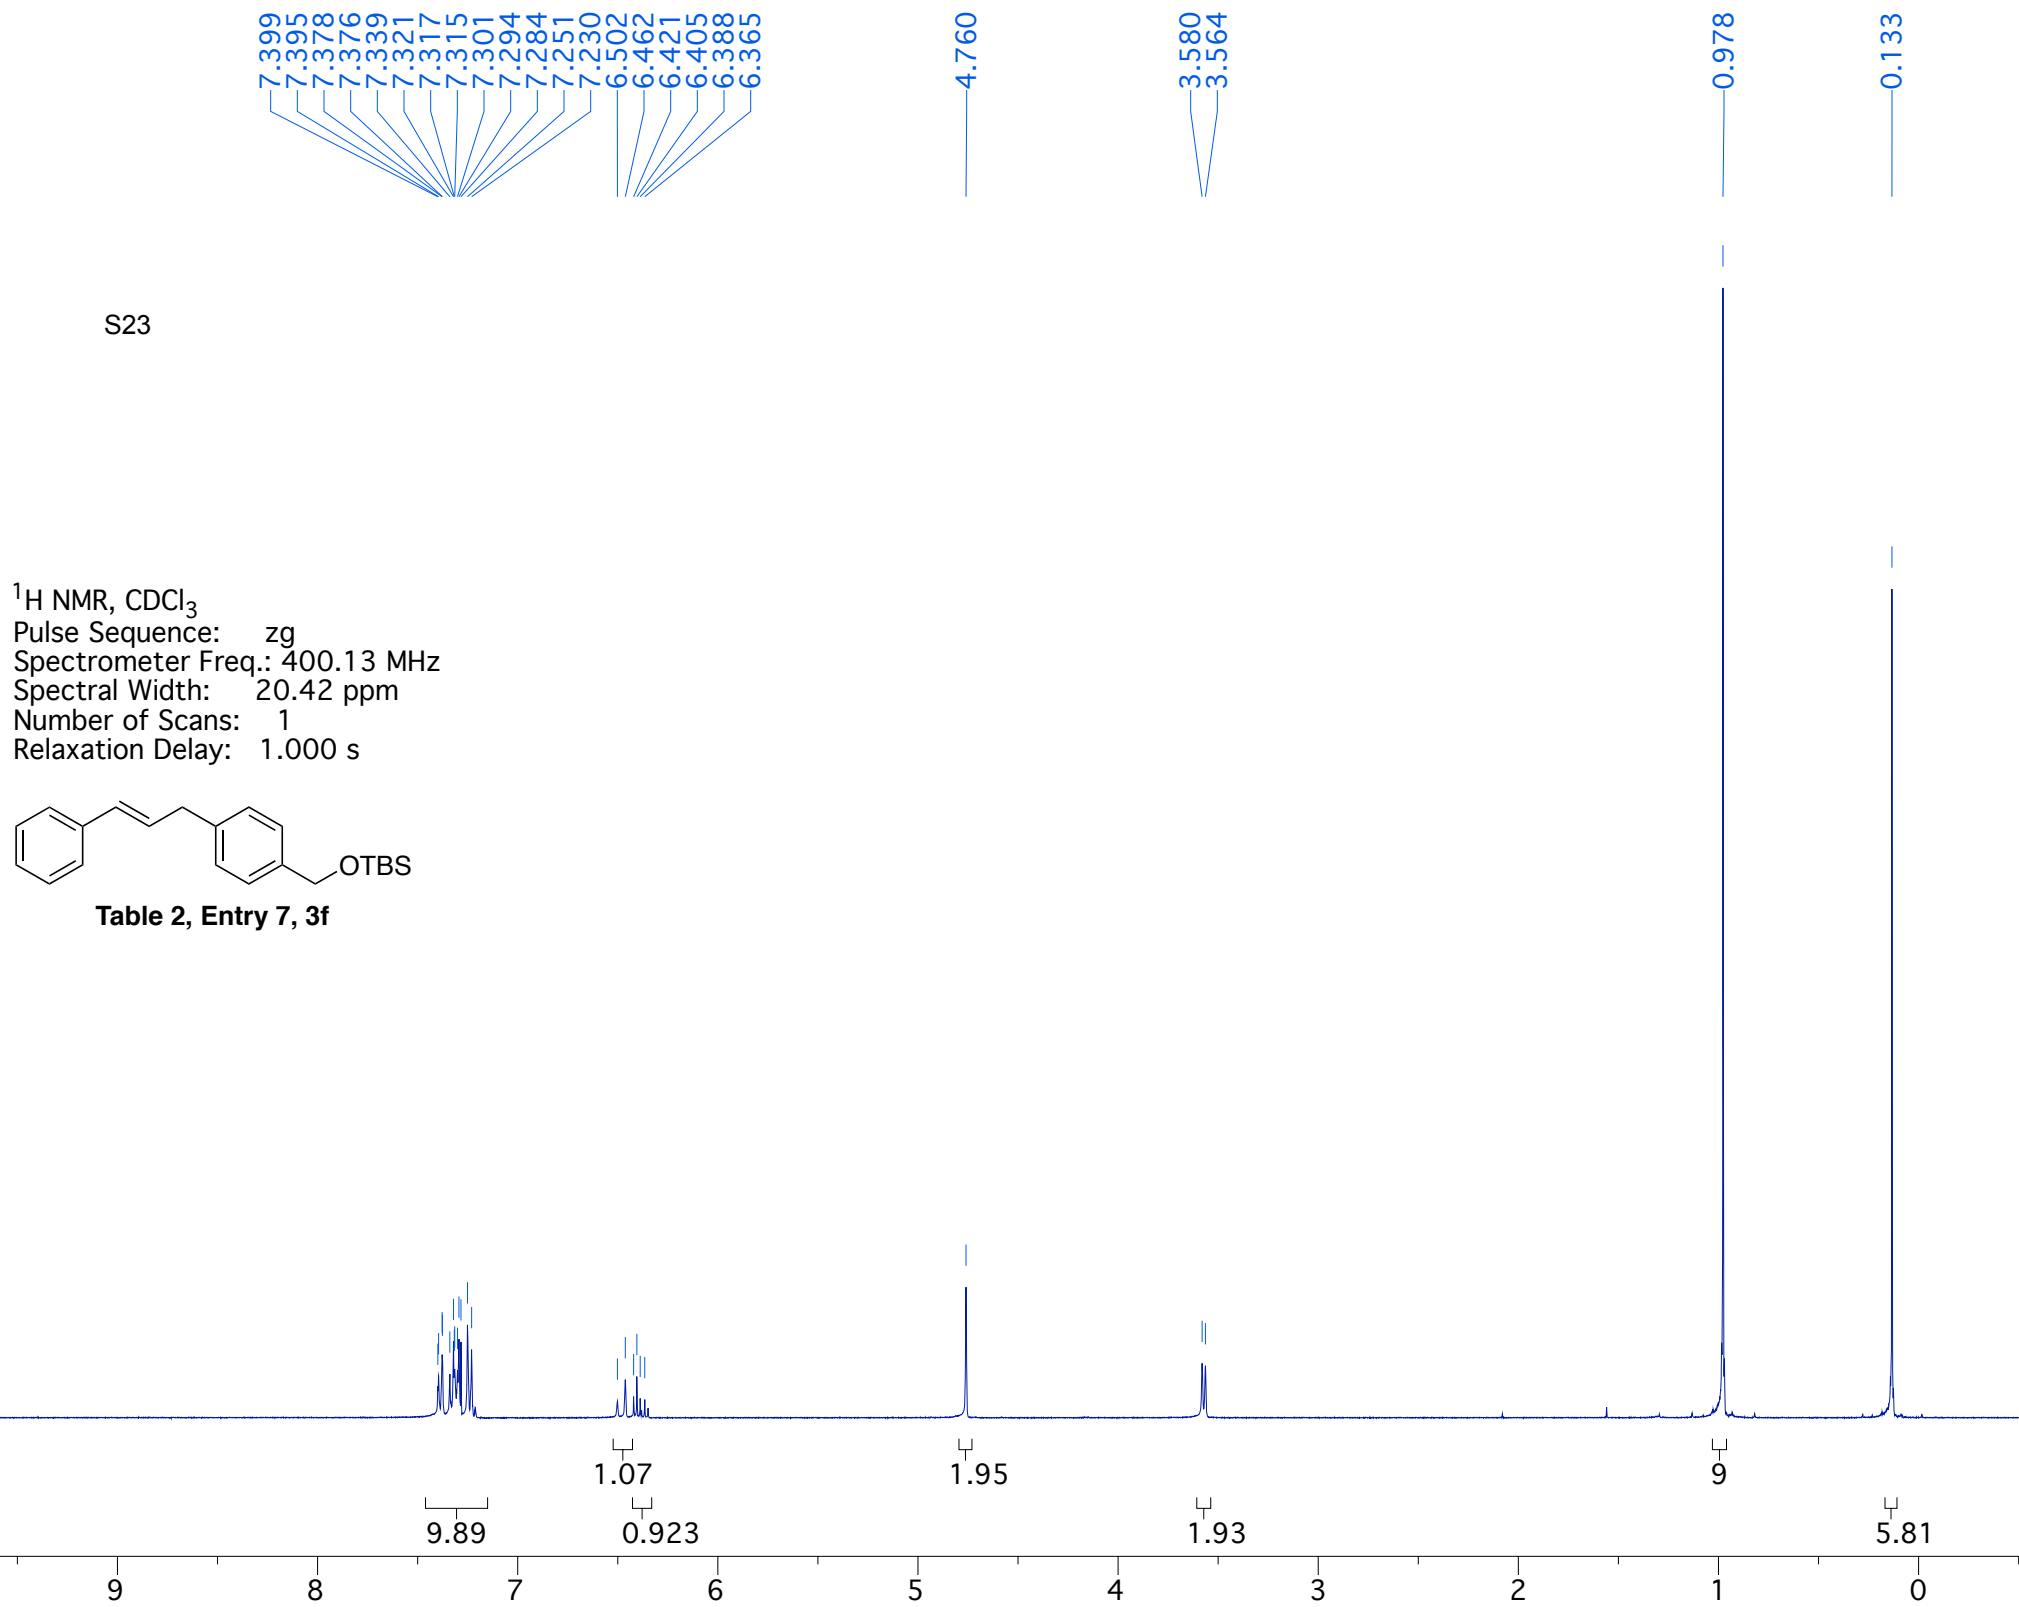

S24

$^{13}\text{C}$  NMR,  $\text{CDCl}_3$   
Pulse Sequence: zgdc  
Spectrometer Freq.: 100.62 MHz  
Spectral Width: 301.16 ppm  
Number of Scans: 342  
Relaxation Delay: 2.000 s

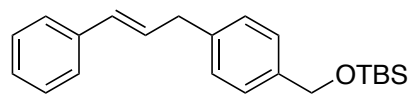

Table 2, Entry 7, 3f

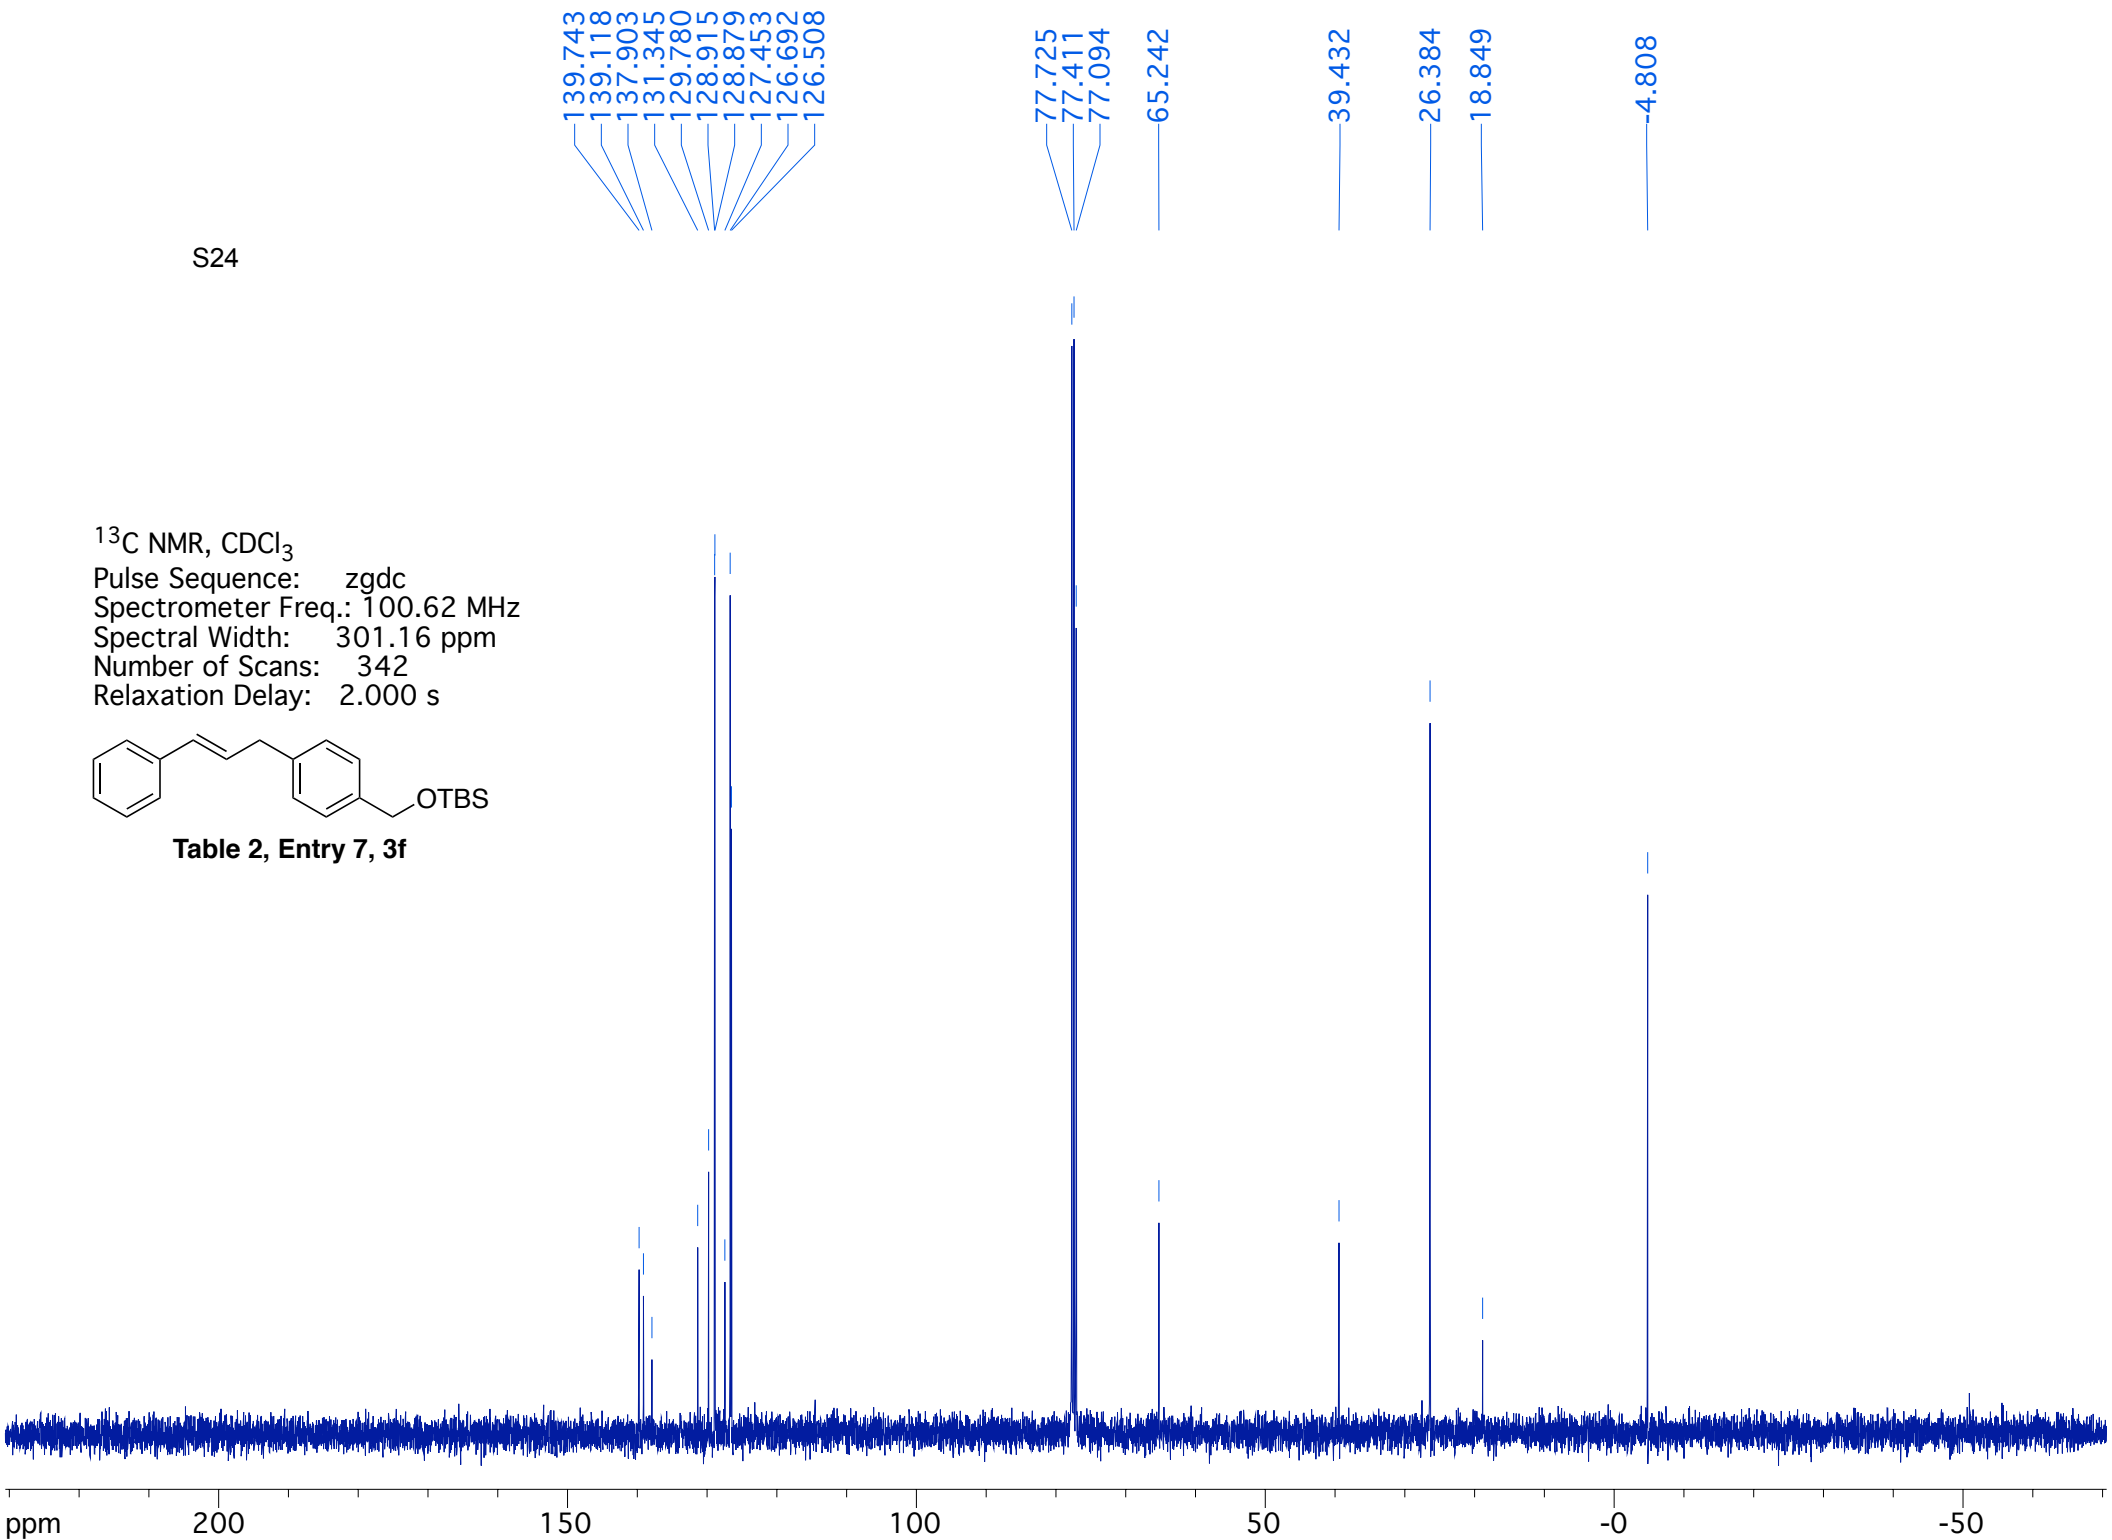

S25

$^1\text{H}$  NMR,  $\text{CDCl}_3$   
Pulse Sequence: zg  
Spectrometer Freq.: 400.13 MHz  
Spectral Width: 20.42 ppm  
Number of Scans: 1  
Relaxation Delay: 1.000 s

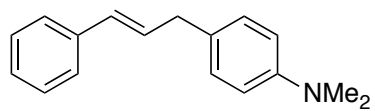

Table 2, Entry 8, 3g

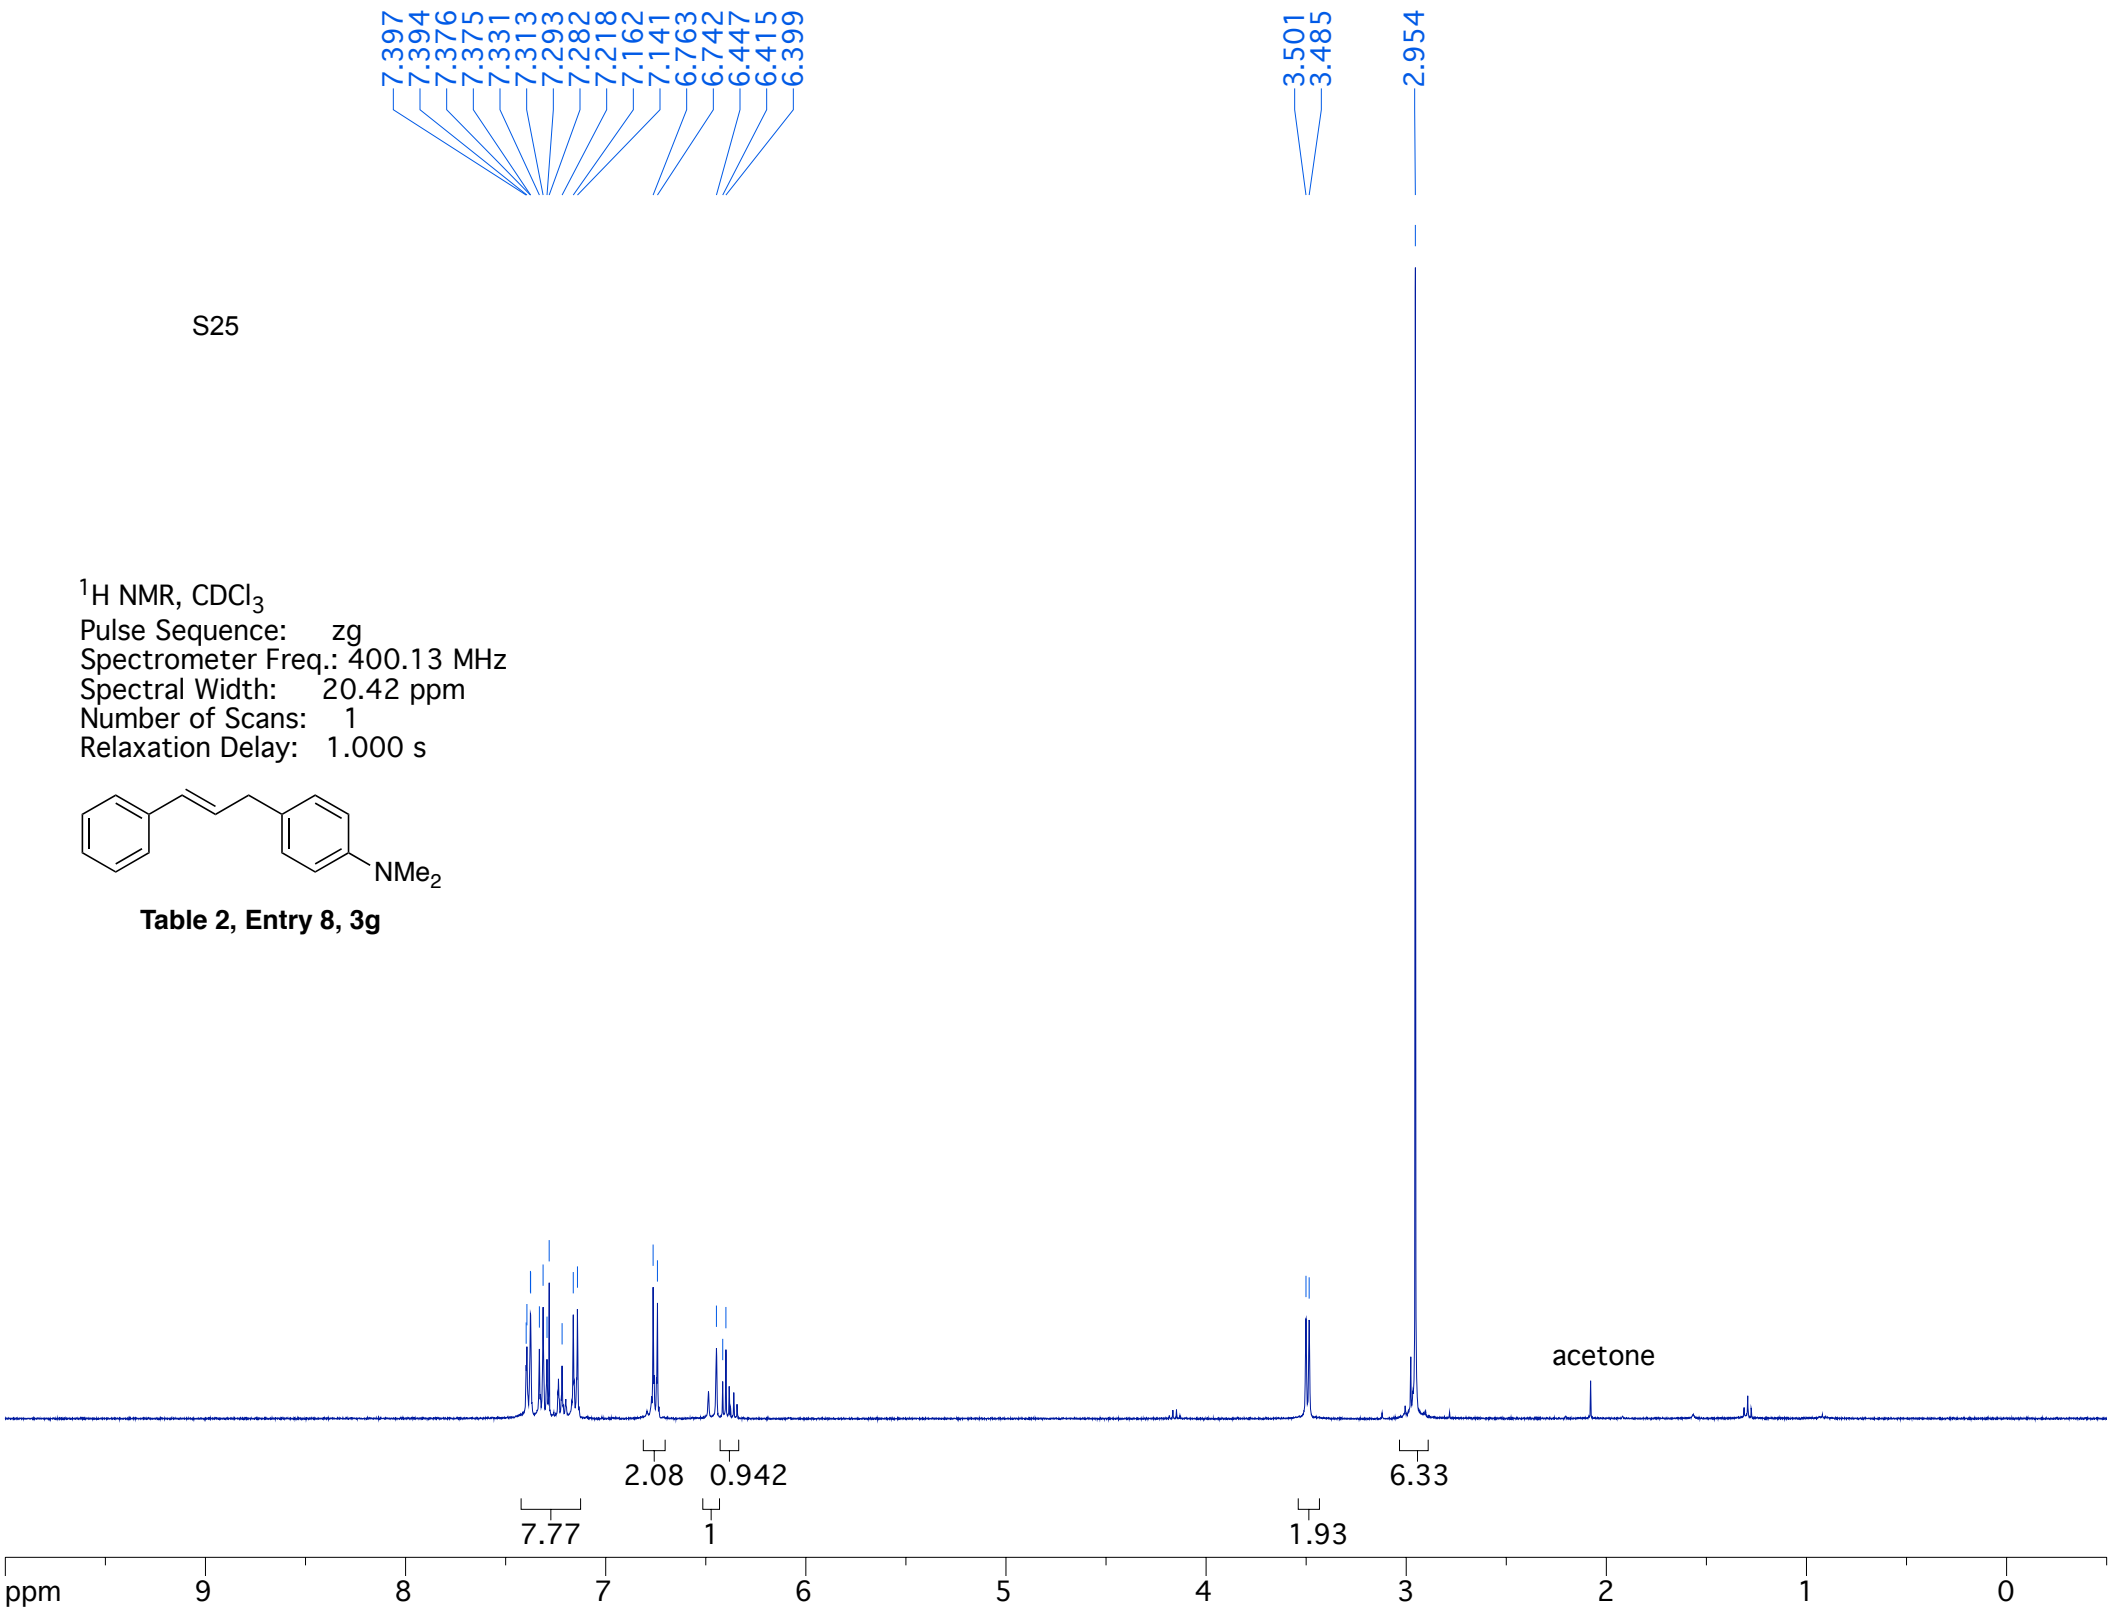

S26

$^{13}\text{C}$  NMR,  $\text{CDCl}_3$   
Pulse Sequence: zgdc  
Spectrometer Freq.: 125.77 MHz  
Spectral Width: 301.18 ppm  
Number of Scans: 284  
Relaxation Delay: 2.000 s

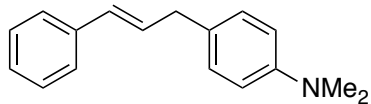

Table 2, Entry 8, 3g

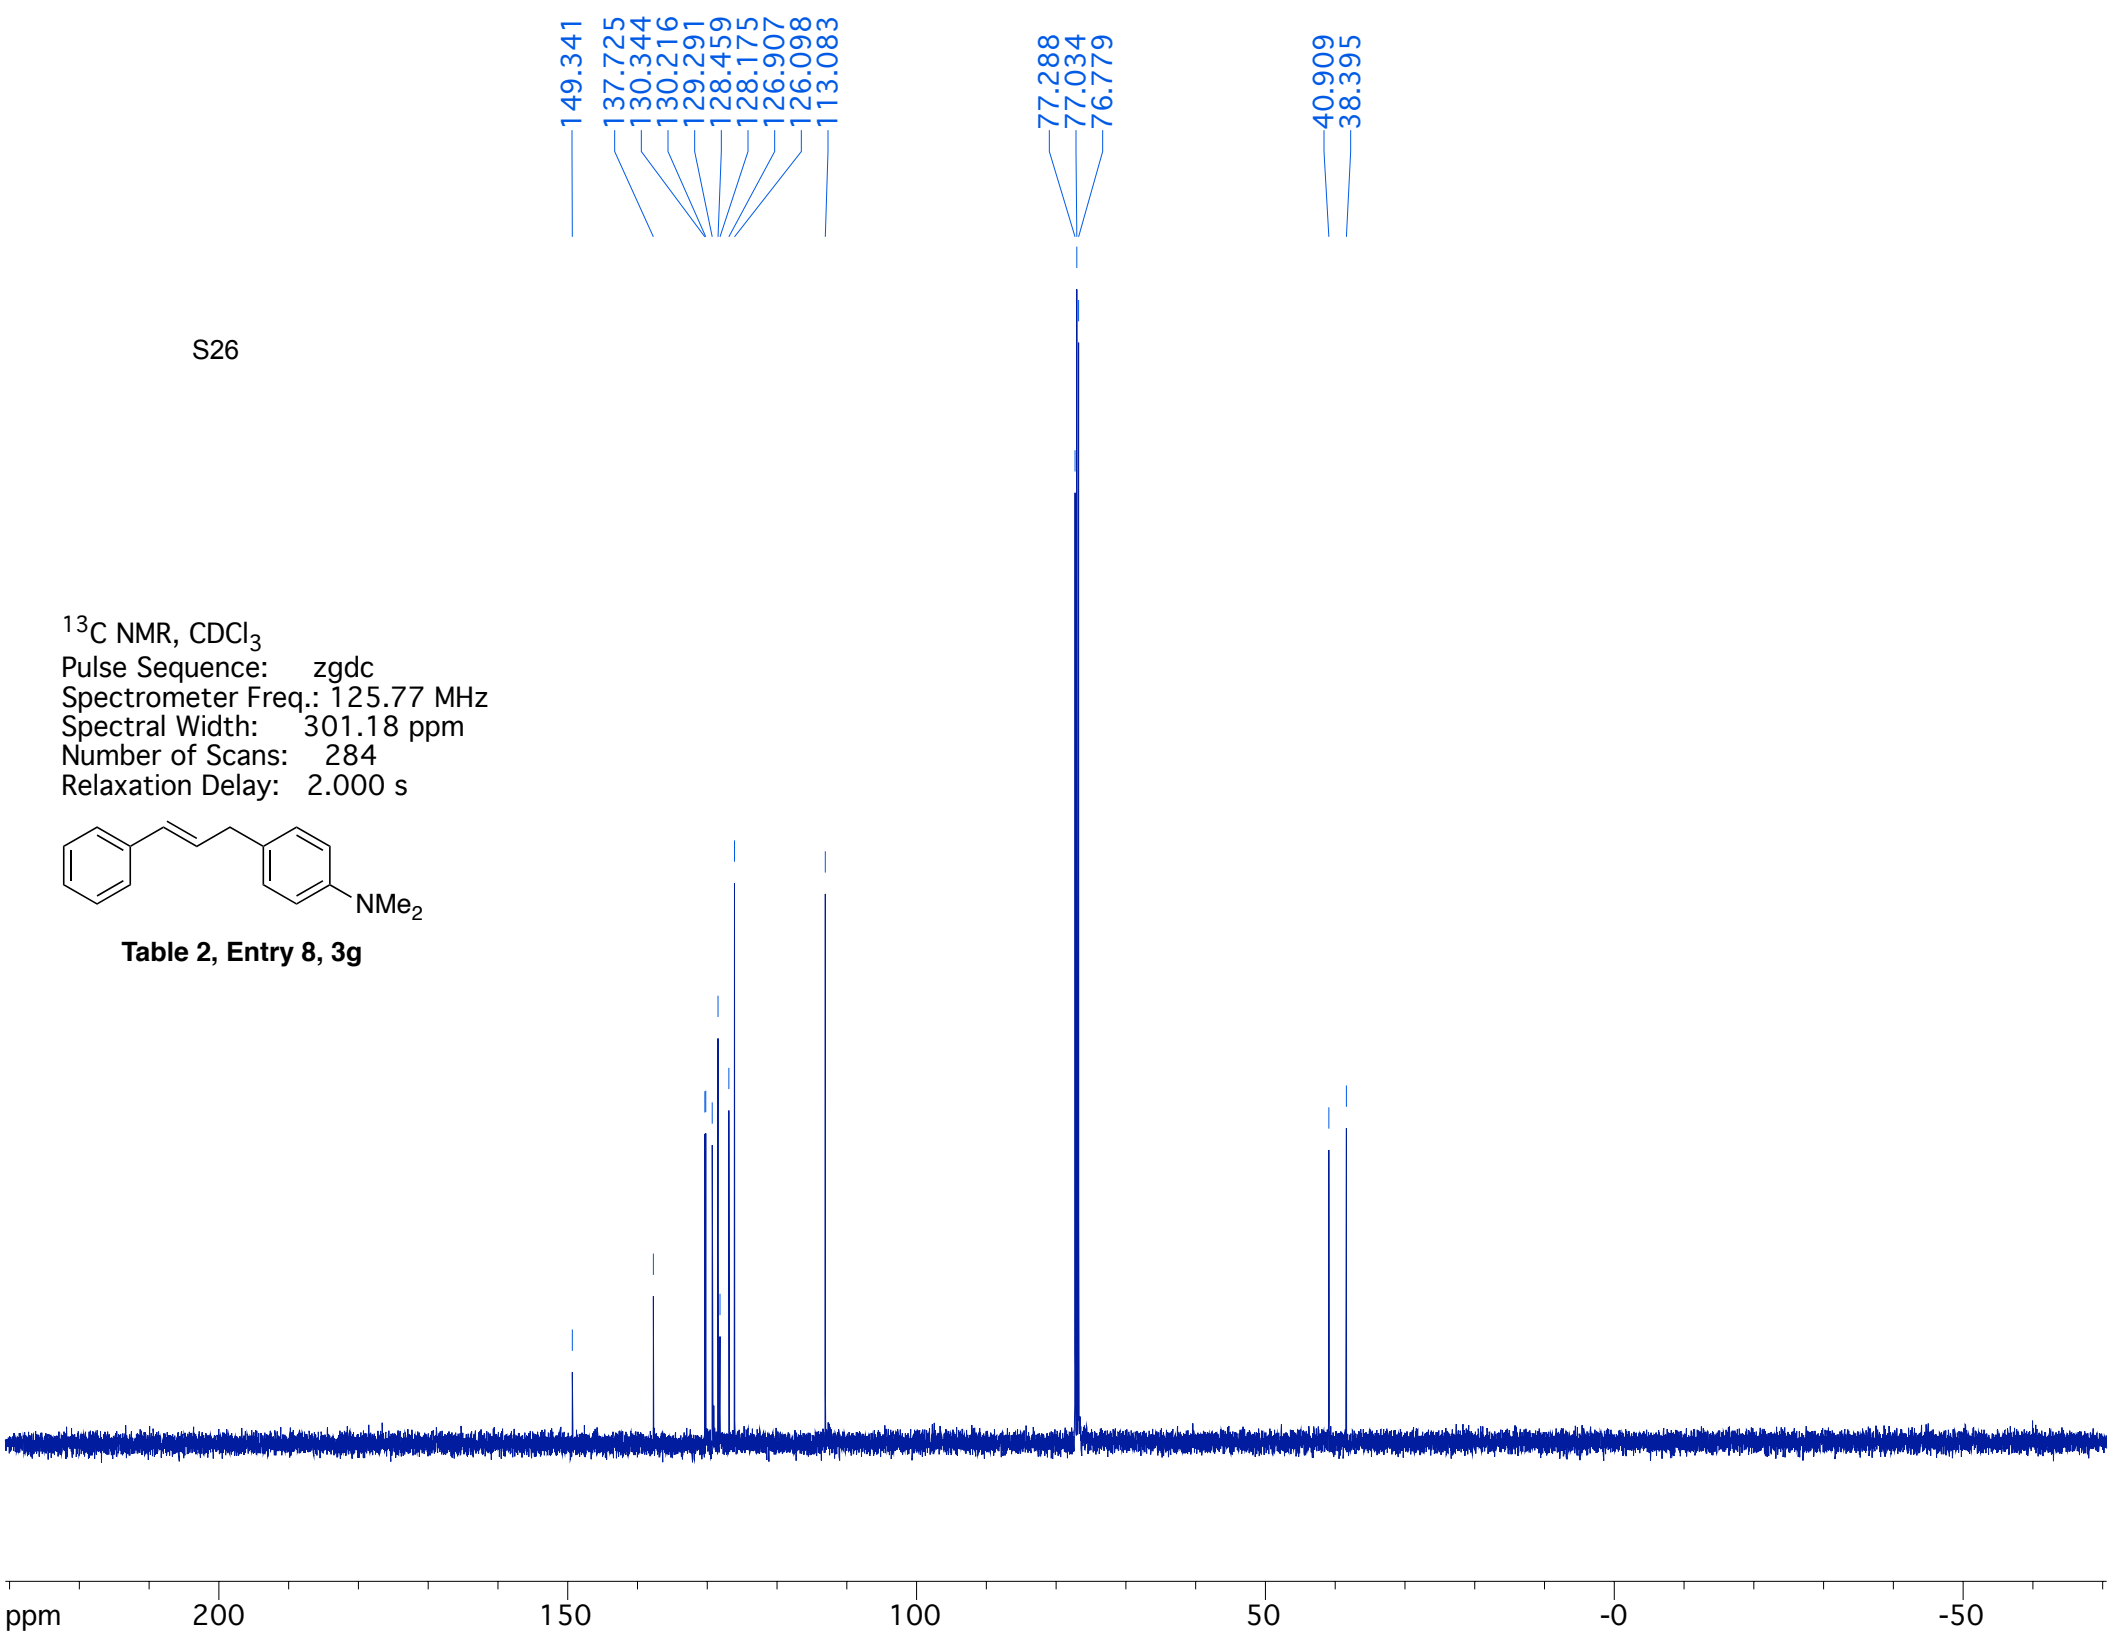

S27

<sup>1</sup>H NMR, CDCl<sub>3</sub>  
Pulse Sequence: zg  
Spectrometer Freq.: 500.13 MHz  
Spectral Width: 19.99 ppm  
Number of Scans: 16  
Relaxation Delay: 1.000 s

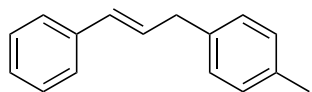

Table 2, Entry 9, 3h

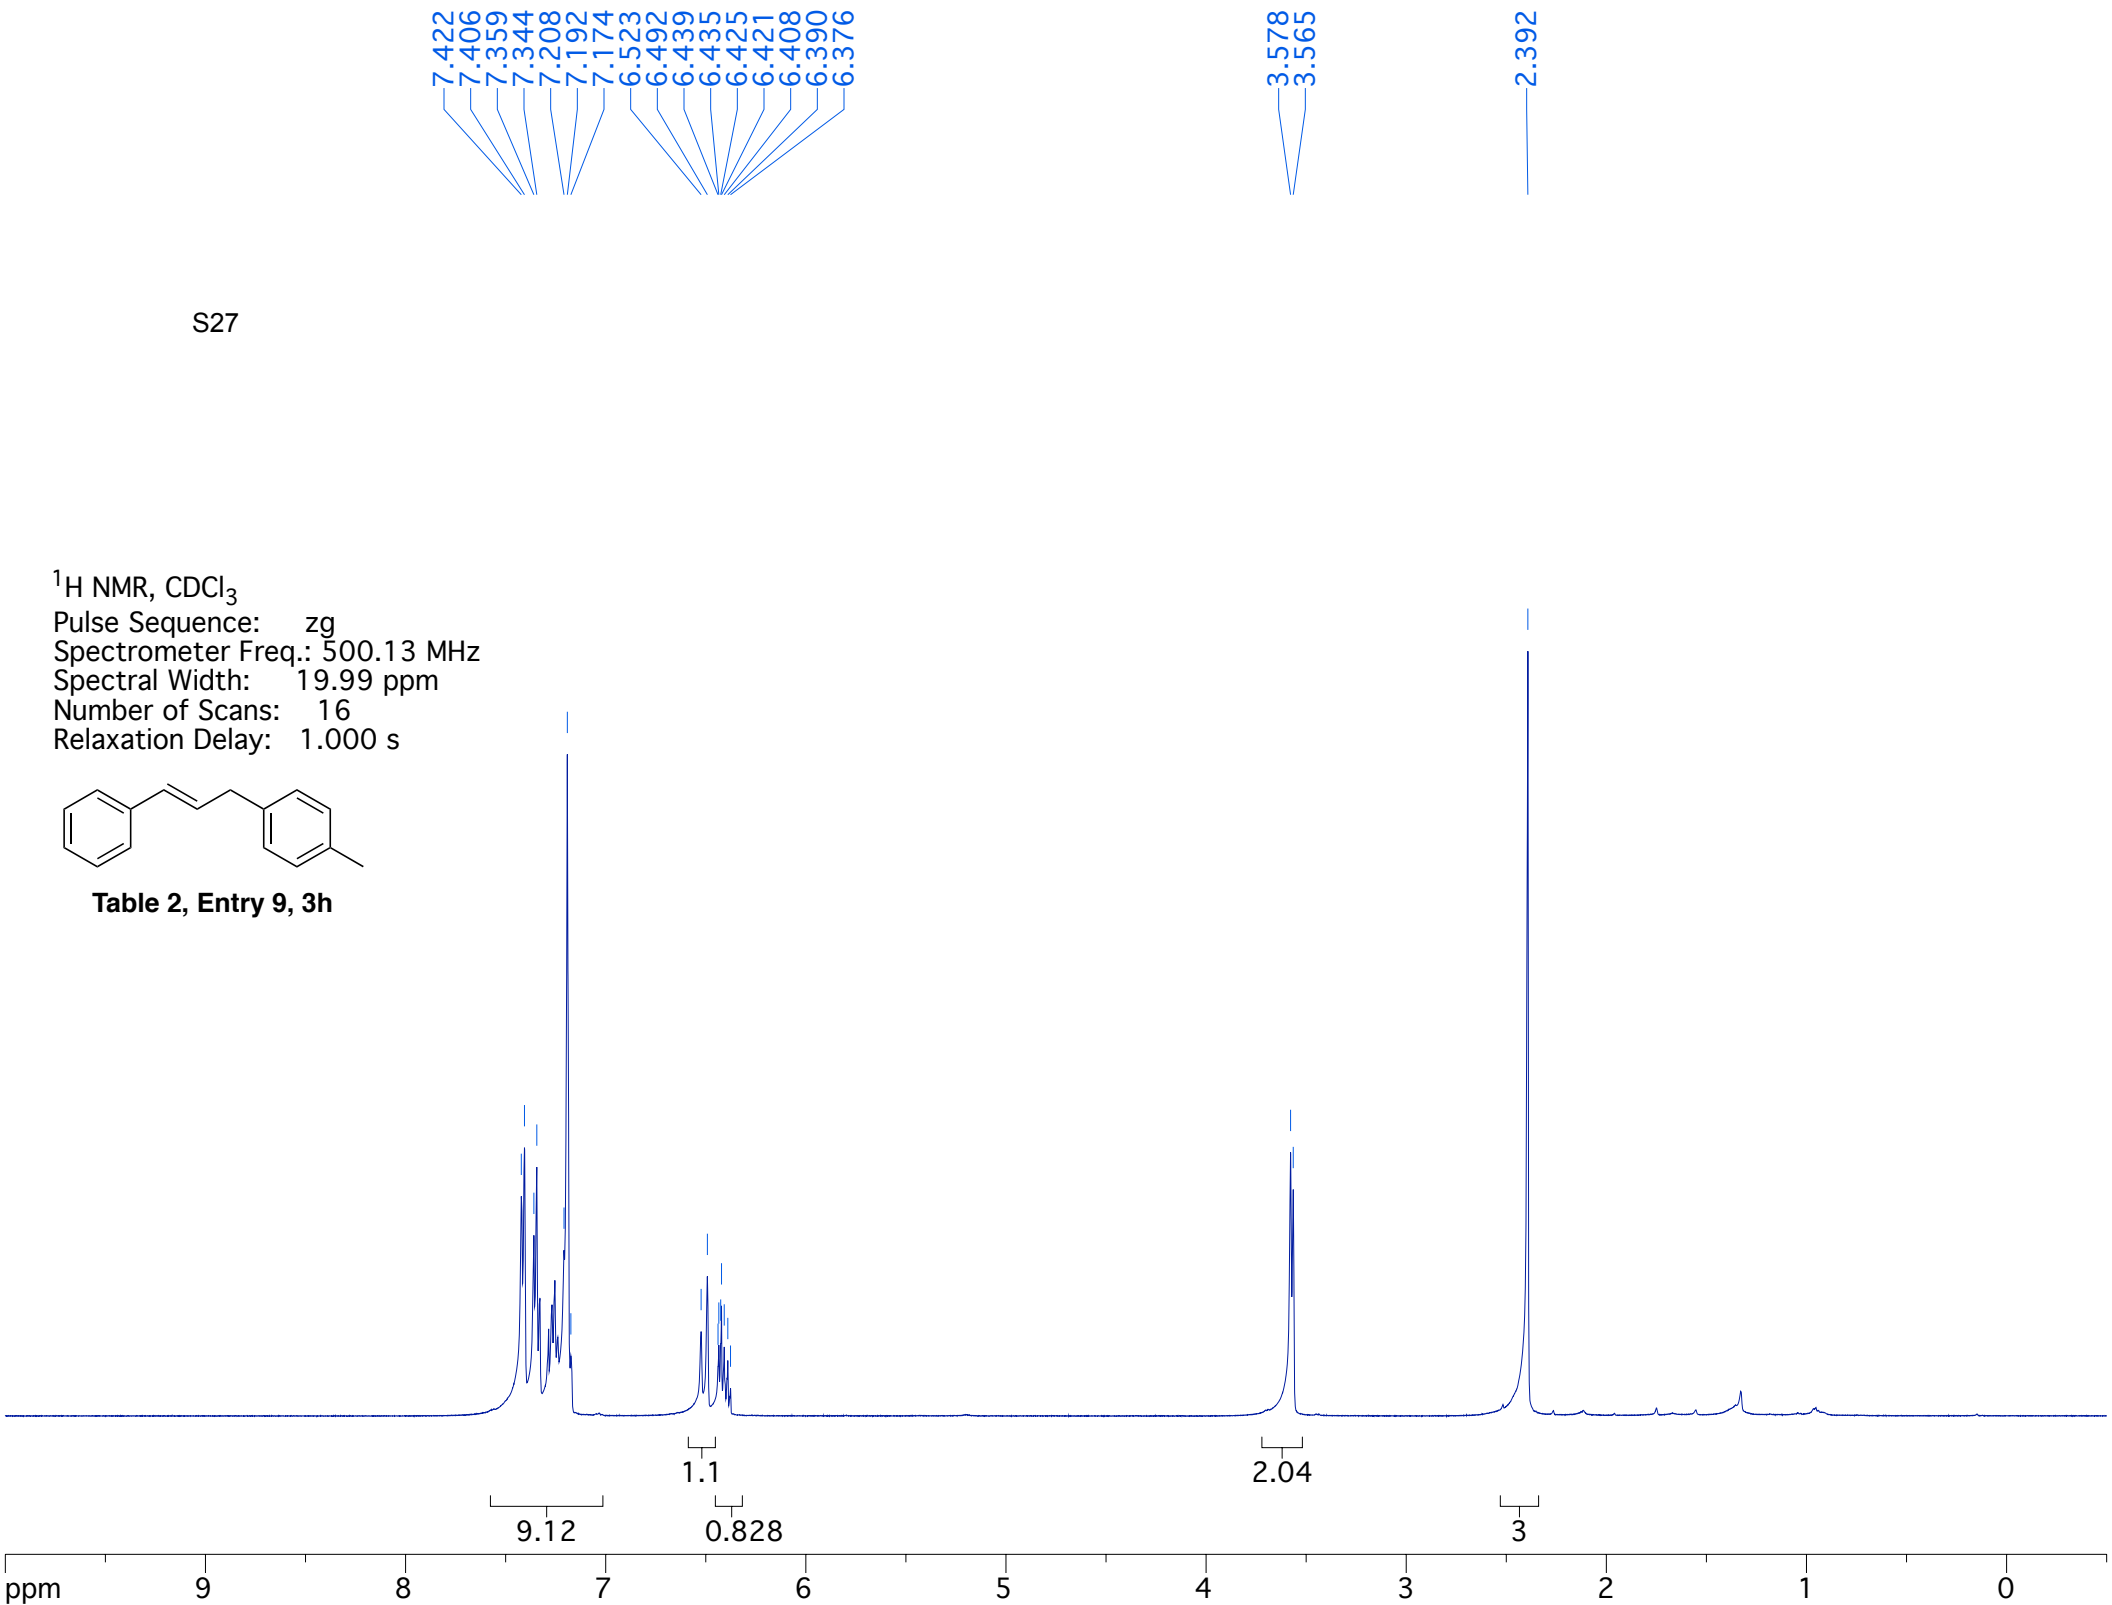

S28

$^{13}\text{C}$  NMR,  $\text{CDCl}_3$   
Pulse Sequence: zgdc  
Spectrometer Freq.: 125.77 MHz  
Spectral Width: 301.18 ppm  
Number of Scans: 74  
Relaxation Delay: 2.000 s

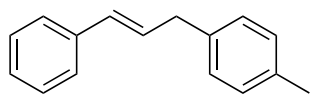

Table 2, Entry 9, 3h

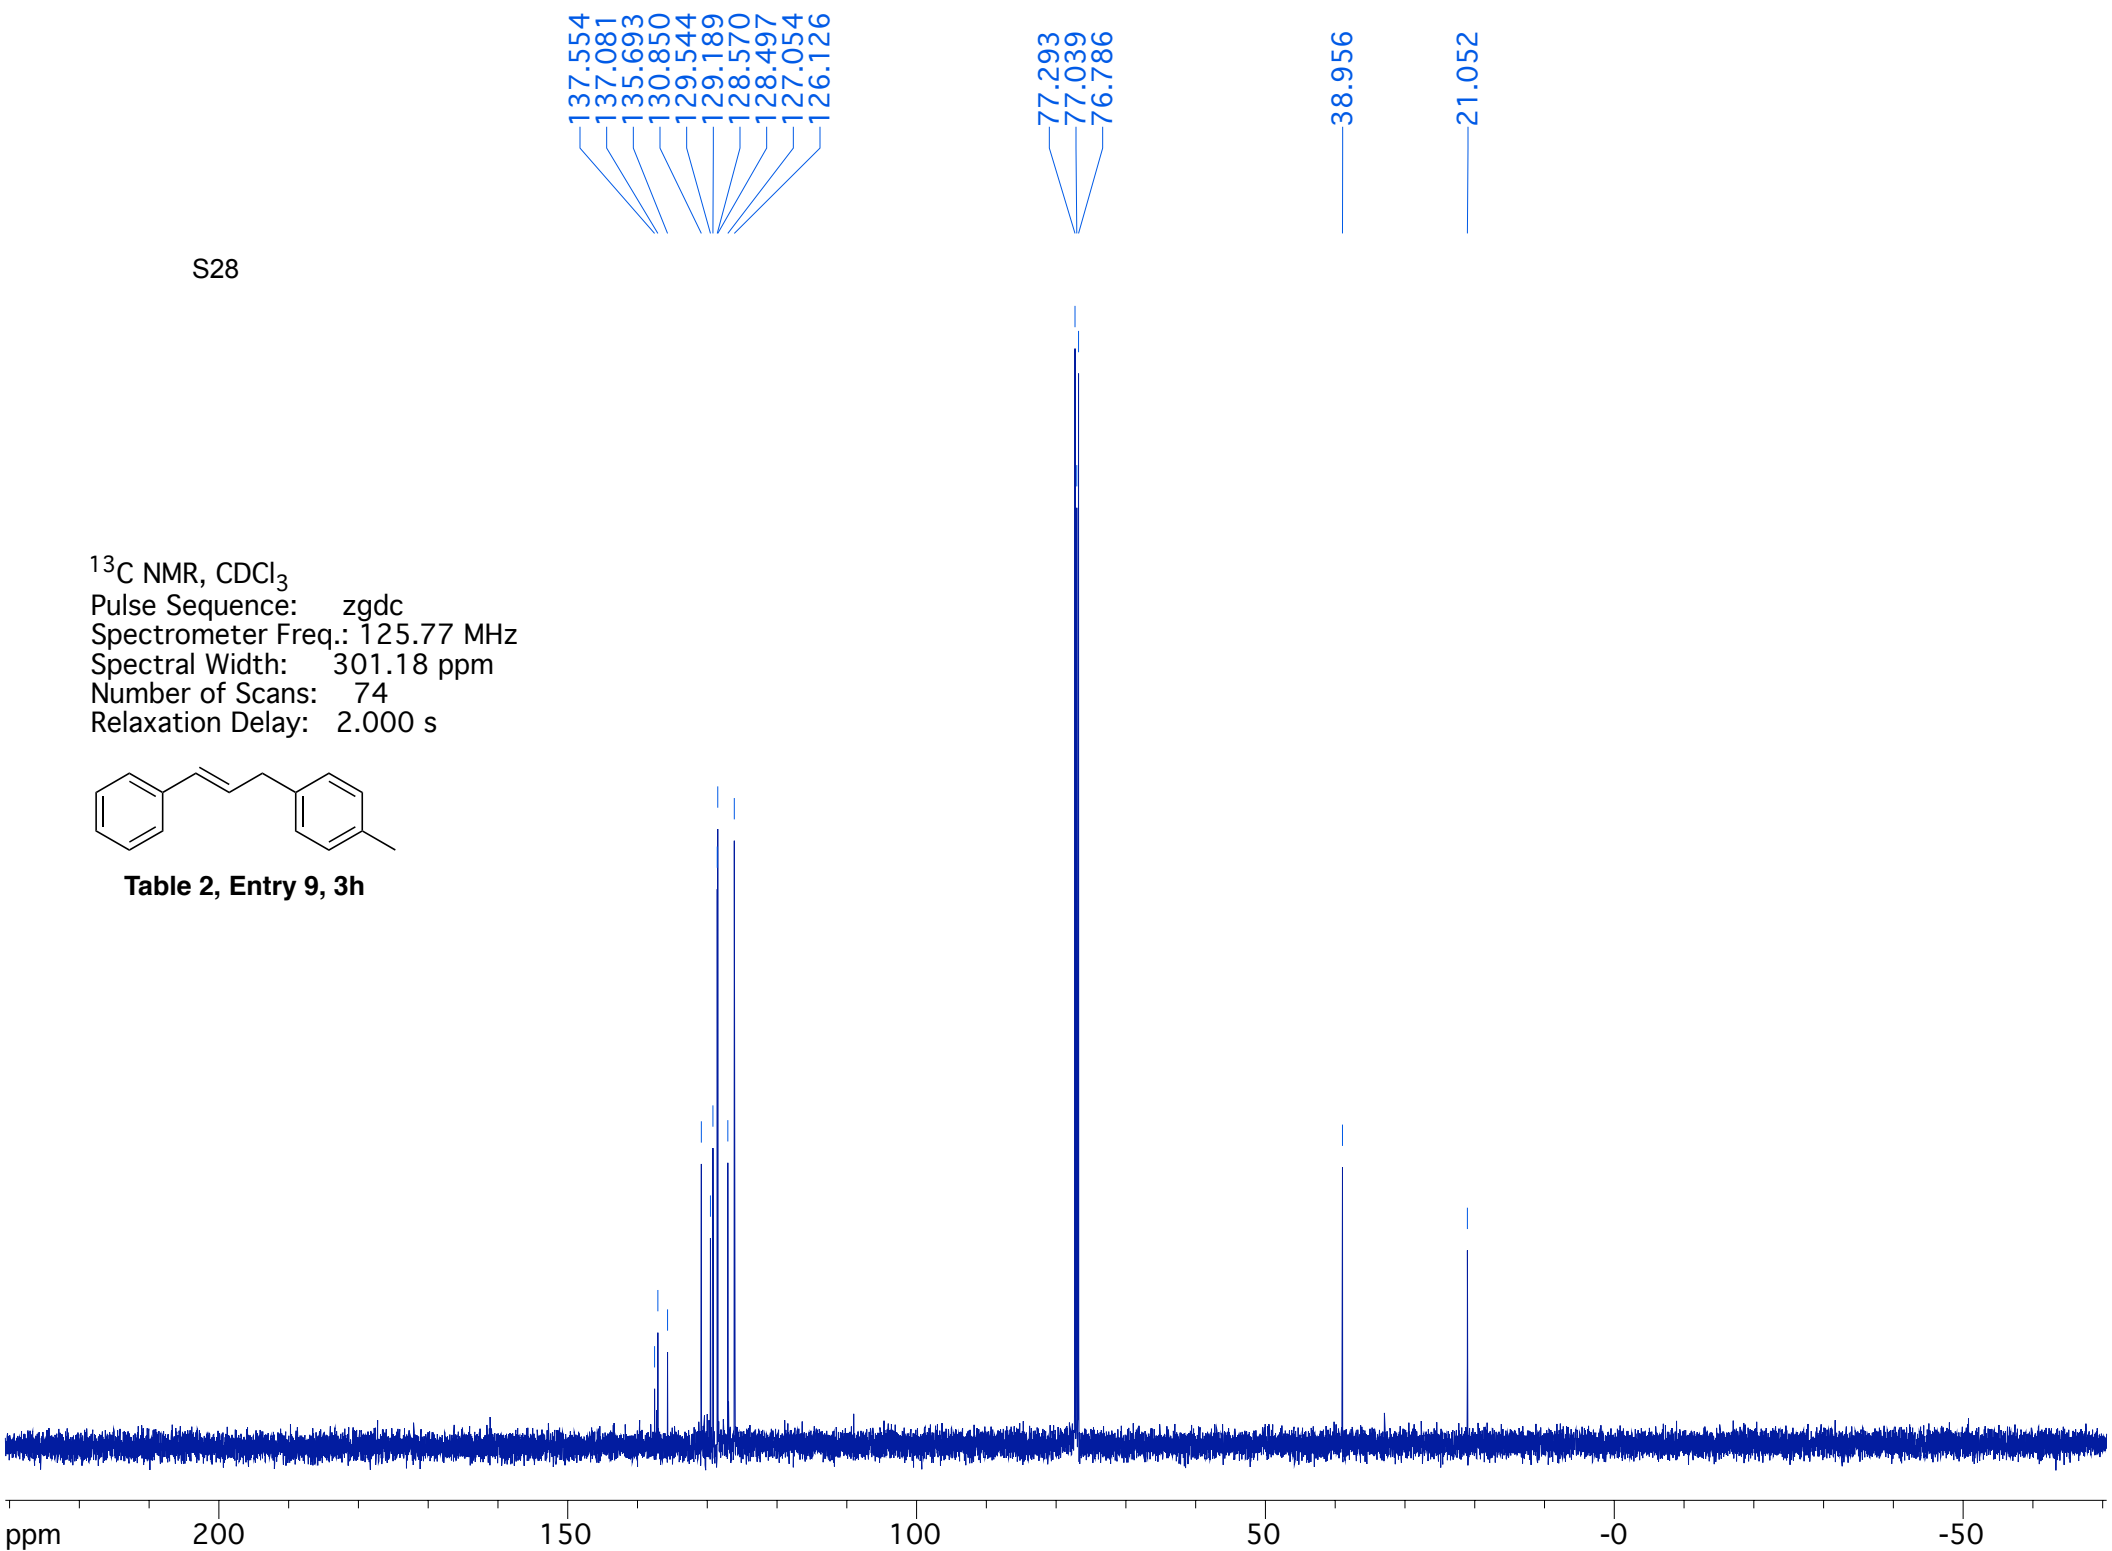

S29

<sup>1</sup>H NMR, CDCl<sub>3</sub>  
Pulse Sequence: zg  
Spectrometer Freq.: 400.05 MHz  
Spectral Width: 20.03 ppm  
Number of Scans: 1  
Relaxation Delay: 1.500 s

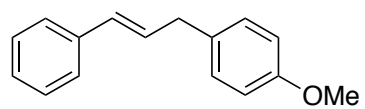

Table 2, Entry 10, 3i

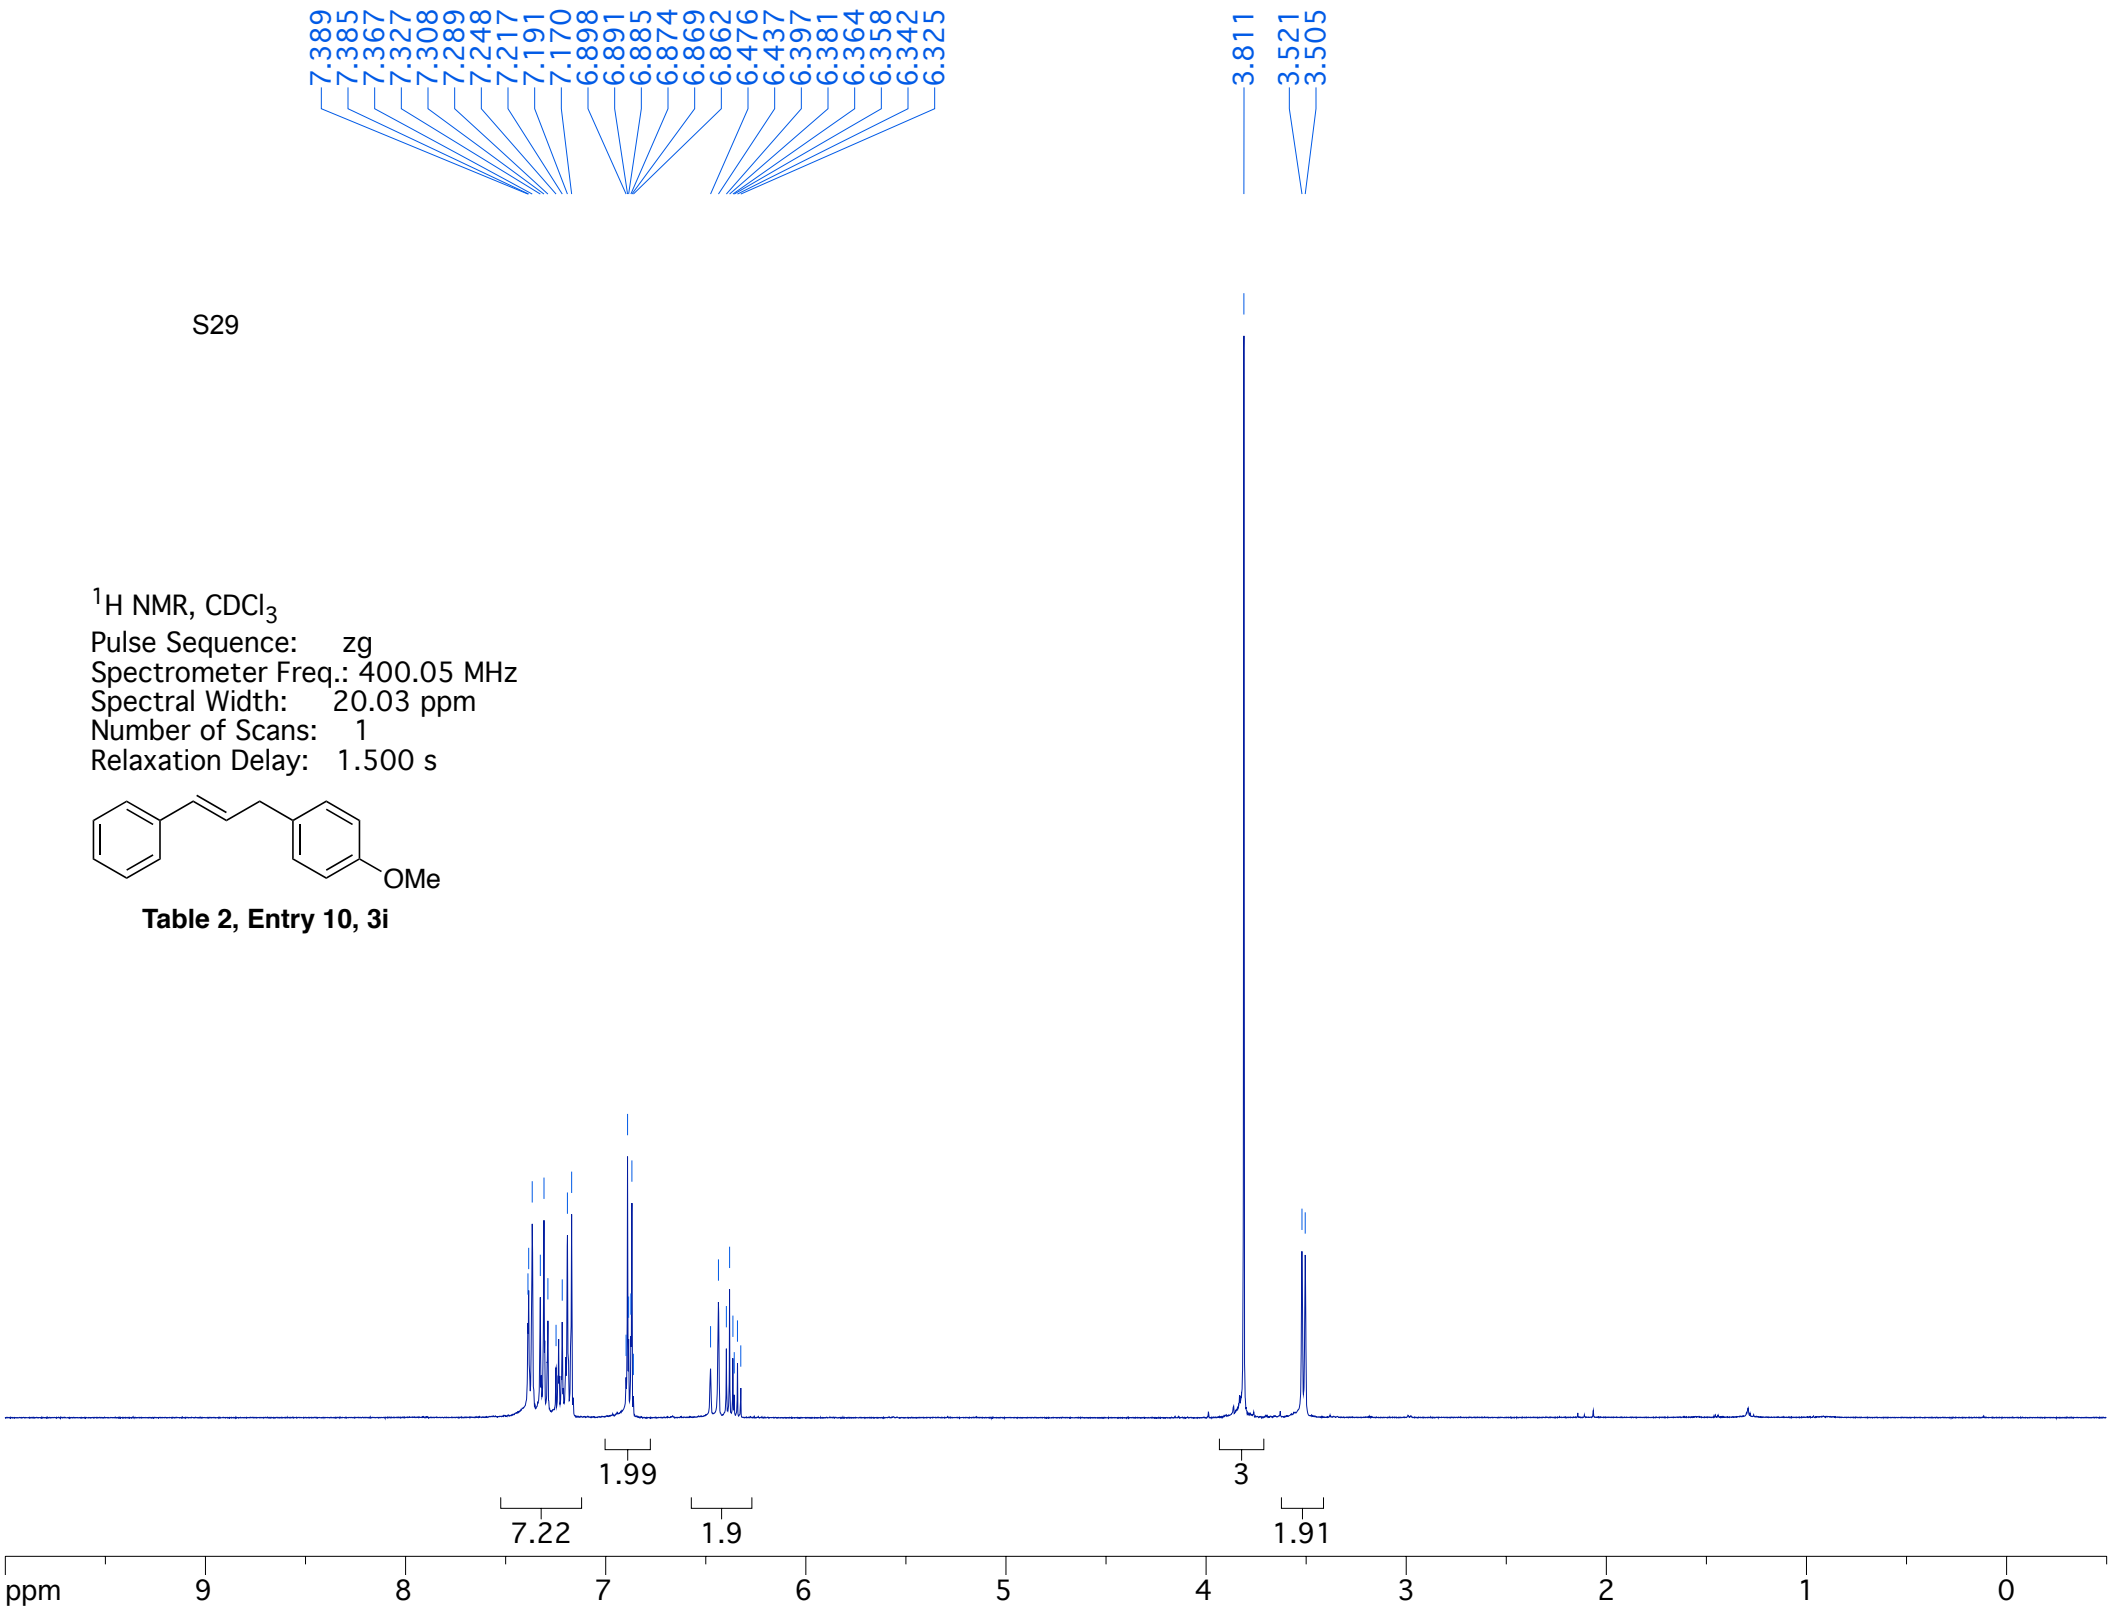



S30

<sup>13</sup>C NMR, CDCl<sub>3</sub>  
Pulse Sequence: zgdc  
Spectrometer Freq.: 100.60 MHz  
Spectral Width: 299.41 ppm  
Number of Scans: 90  
Relaxation Delay: 2.000 s

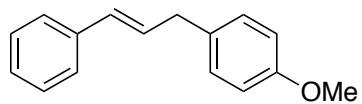

Table 2, Entry 10, 3i

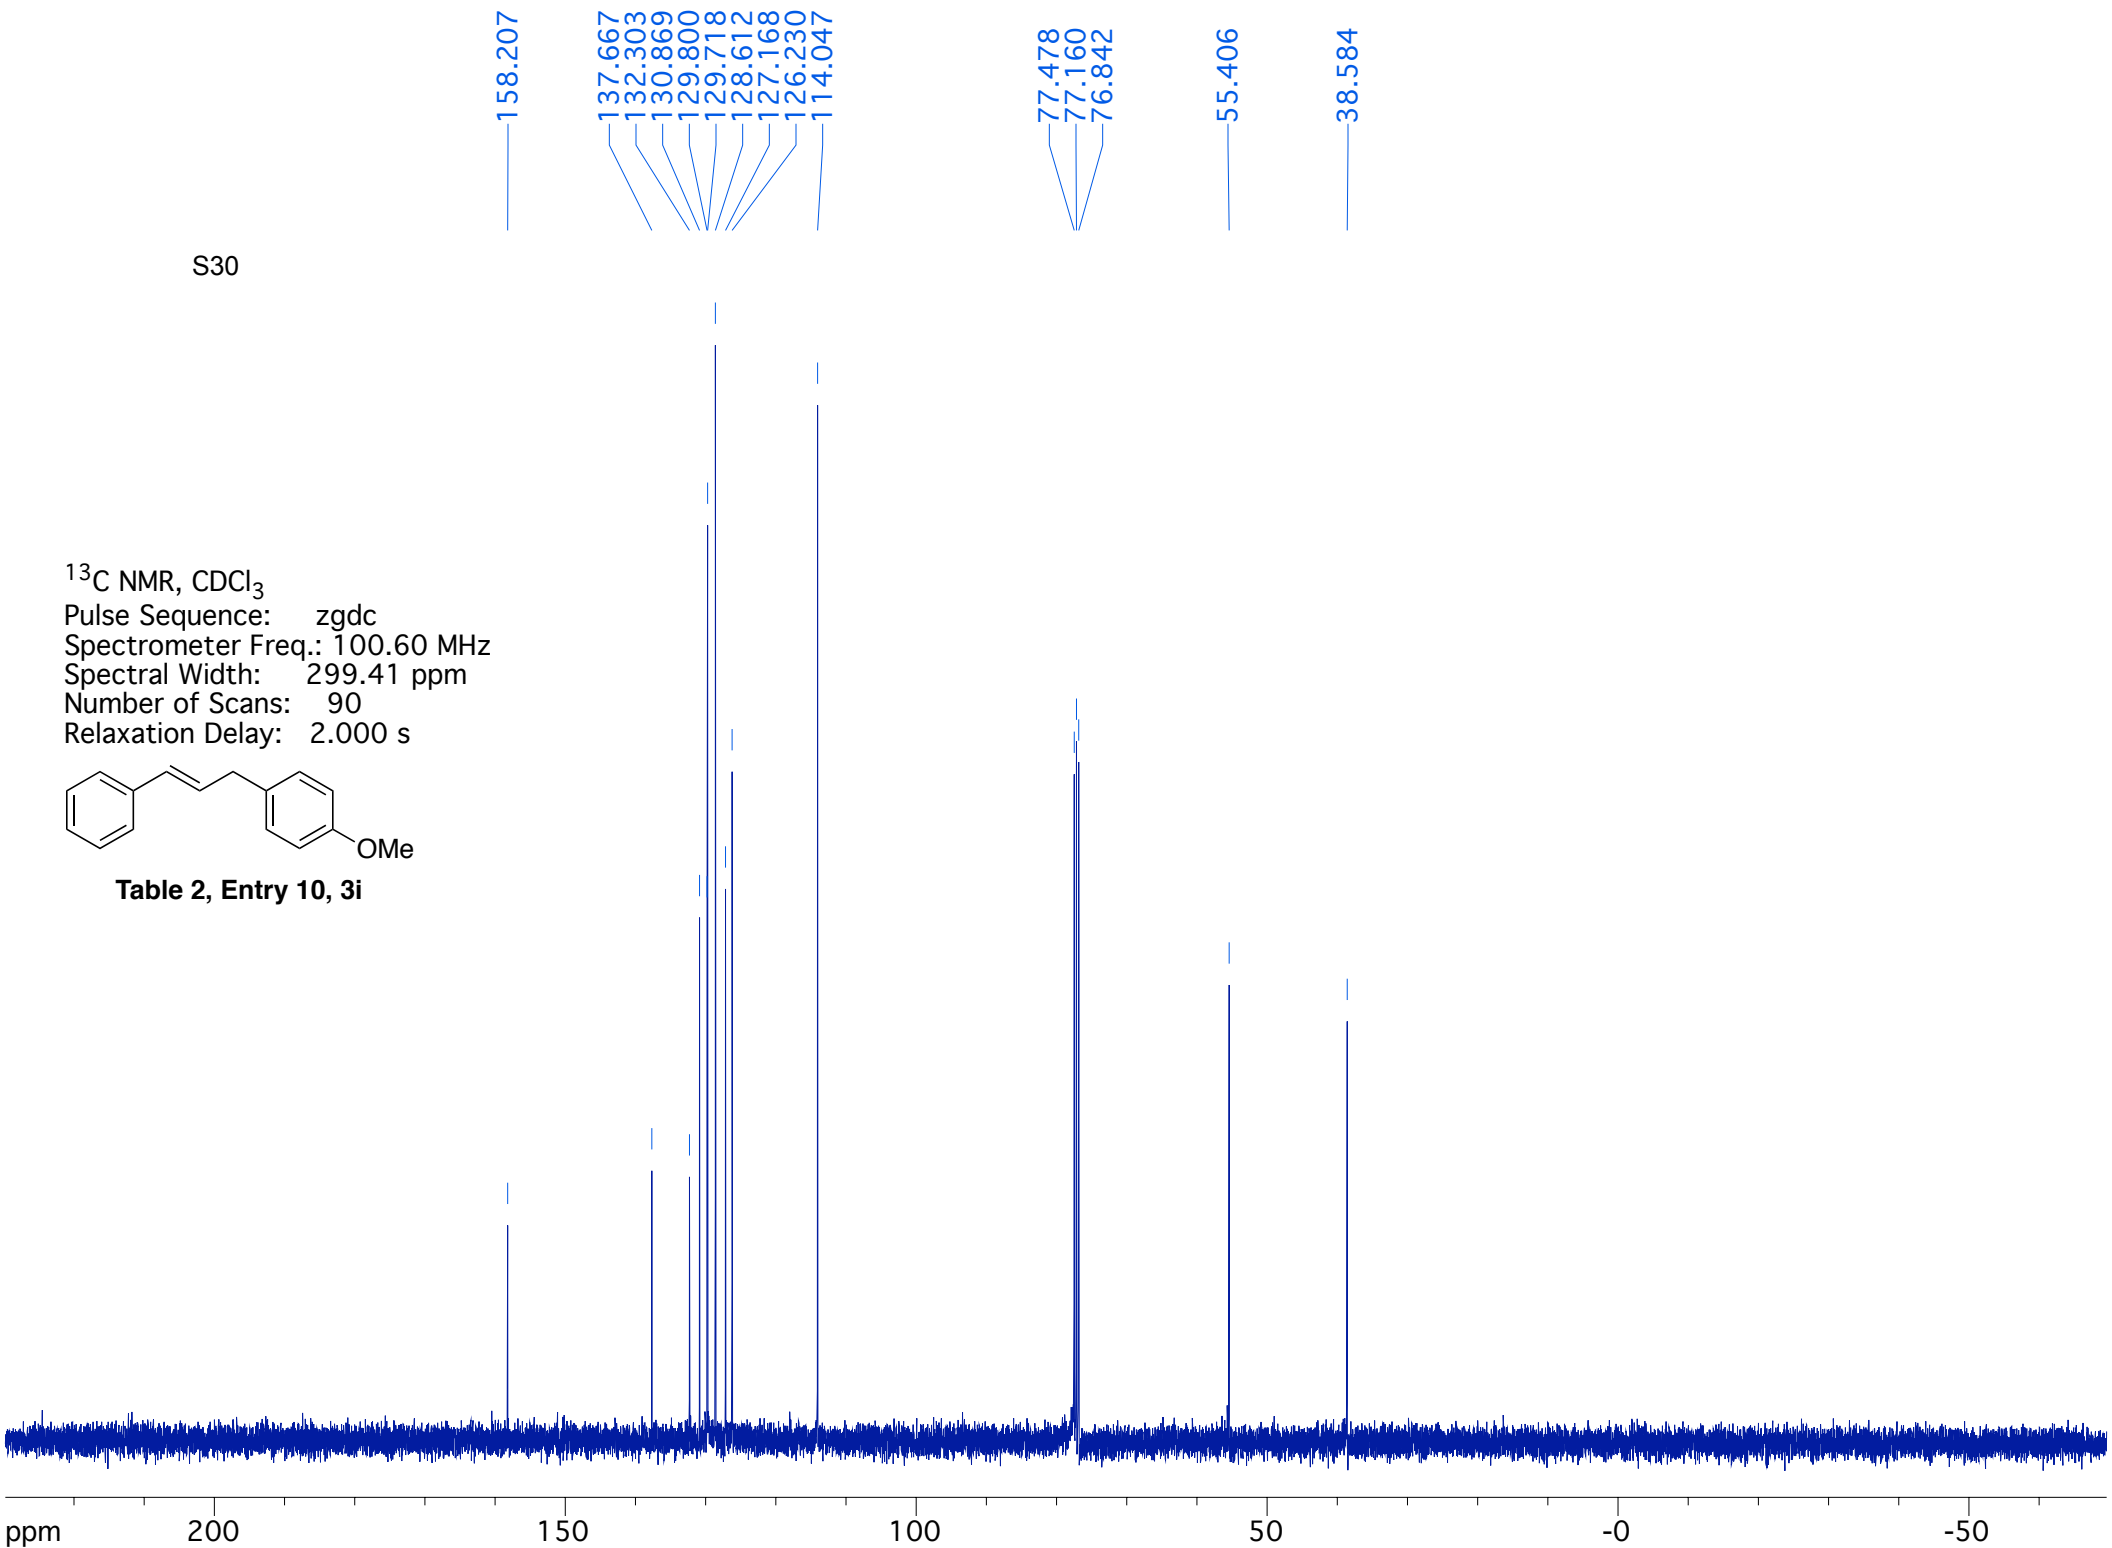

7.473  
7.469  
7.456  
7.399  
7.397  
7.382  
7.350  
7.335  
7.320  
7.289  
7.266  
7.251  
7.162  
7.146  
6.494  
6.463  
6.374  
6.360  
6.346  
6.342  
6.329  
6.315

3.541  
3.528

S31

<sup>1</sup>H NMR, CDCl<sub>3</sub>  
Pulse Sequence: zg  
Spectrometer Freq.: 500.13 MHz  
Spectral Width: 19.99 ppm  
Number of Scans: 16  
Relaxation Delay: 1.000 s

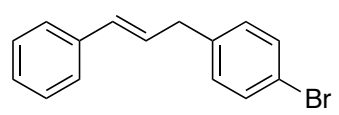

Table 2, Entry 11, 3j

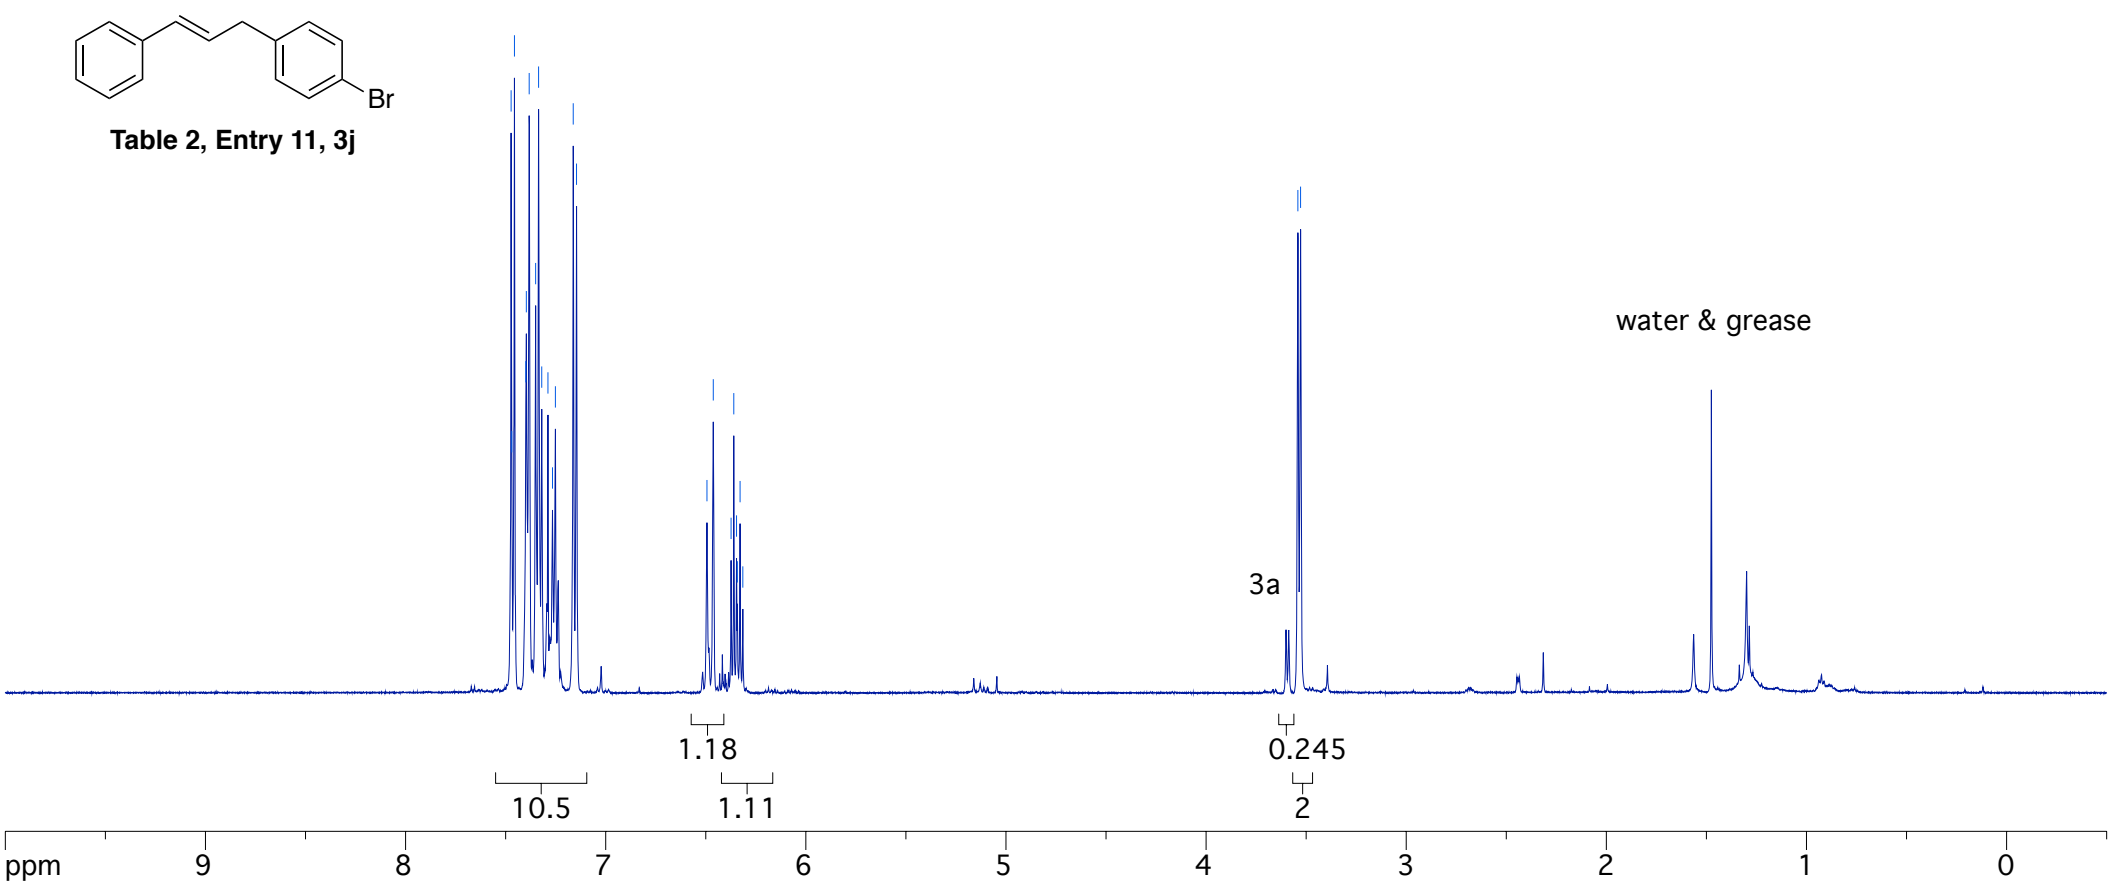

S32

$^{13}\text{C}$  NMR,  $\text{CDCl}_3$   
Pulse Sequence: zgdc  
Spectrometer Freq.: 125.77 MHz  
Spectral Width: 301.18 ppm  
Number of Scans: 366  
Relaxation Delay: 2.000 s

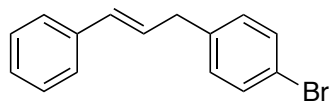

Table 2, Entry 11, 3j

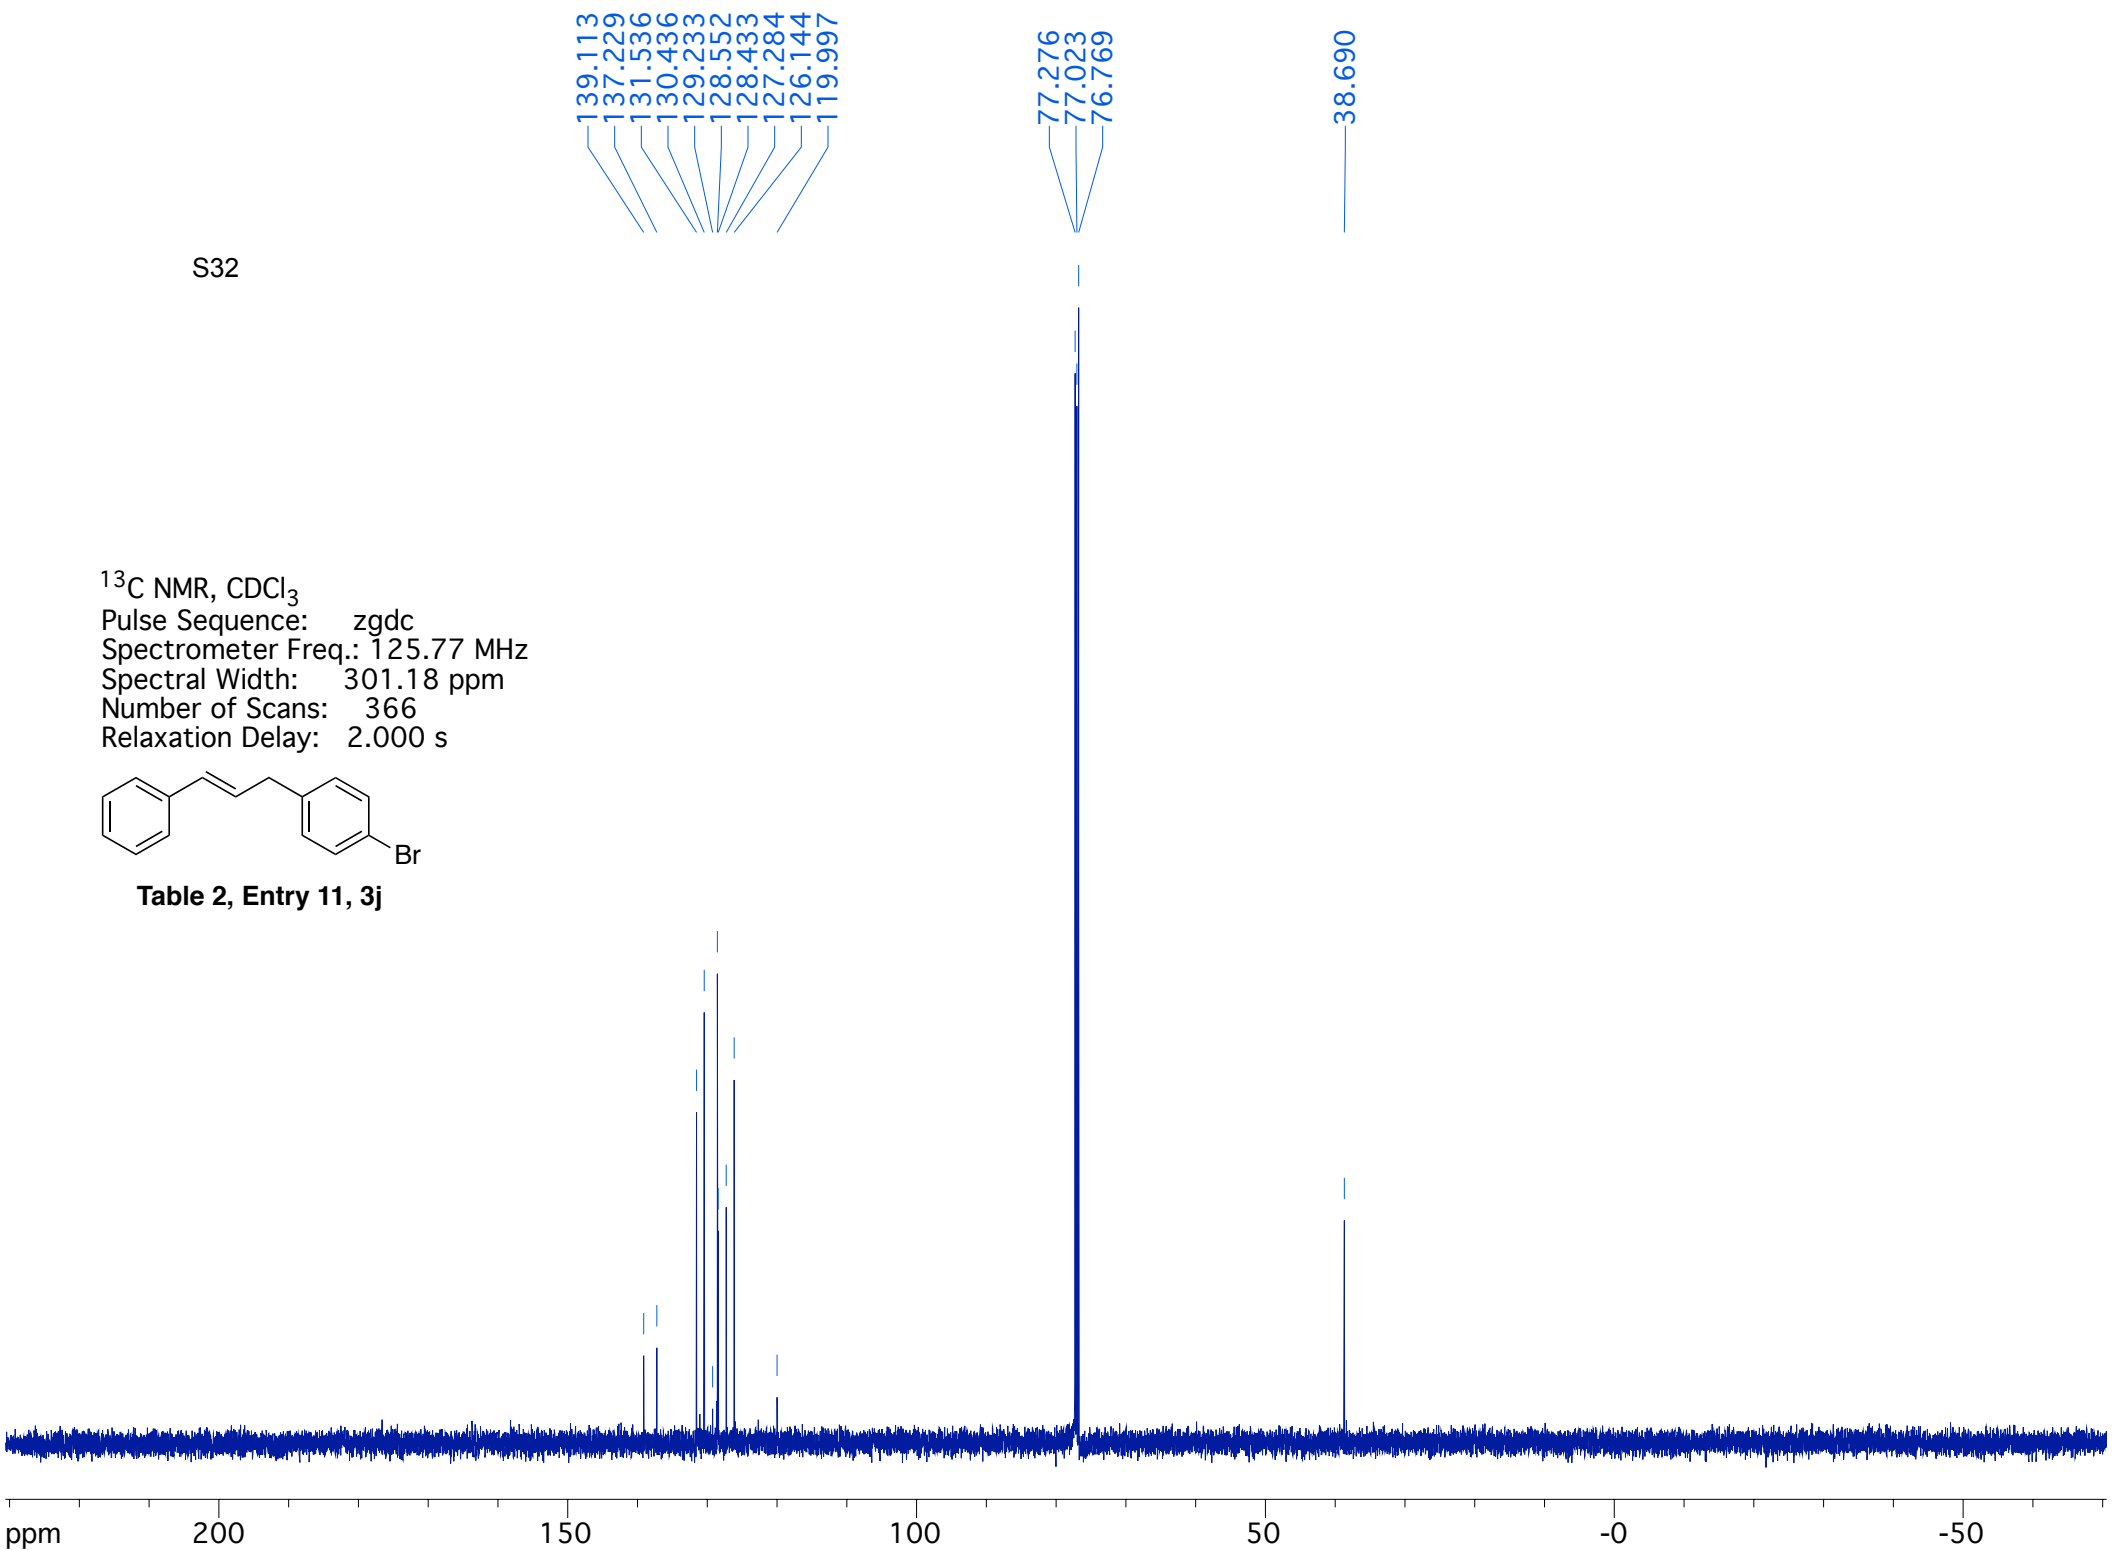

8.016  
8.011  
8.006  
7.995  
7.990  
7.986  
7.422  
7.401  
7.383  
7.379  
7.374  
7.362  
7.359  
7.354  
7.335  
7.329  
7.324  
7.313  
7.311  
7.307  
7.295  
7.291  
7.260  
7.248  
7.245  
7.241  
7.232  
7.227  
7.221  
7.212  
7.209  
6.498  
6.459  
6.381  
6.364  
6.347  
6.341  
6.324  
6.307

3.918  
3.617  
3.600

S33

<sup>1</sup>H NMR, CDCl<sub>3</sub>  
Pulse Sequence: zg  
Spectrometer Freq.: 400.13 MHz  
Spectral Width: 20.42 ppm  
Number of Scans: 1  
Relaxation Delay: 1.000 s

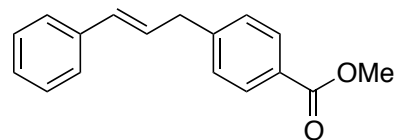

Table 2, Entry 12, 3k

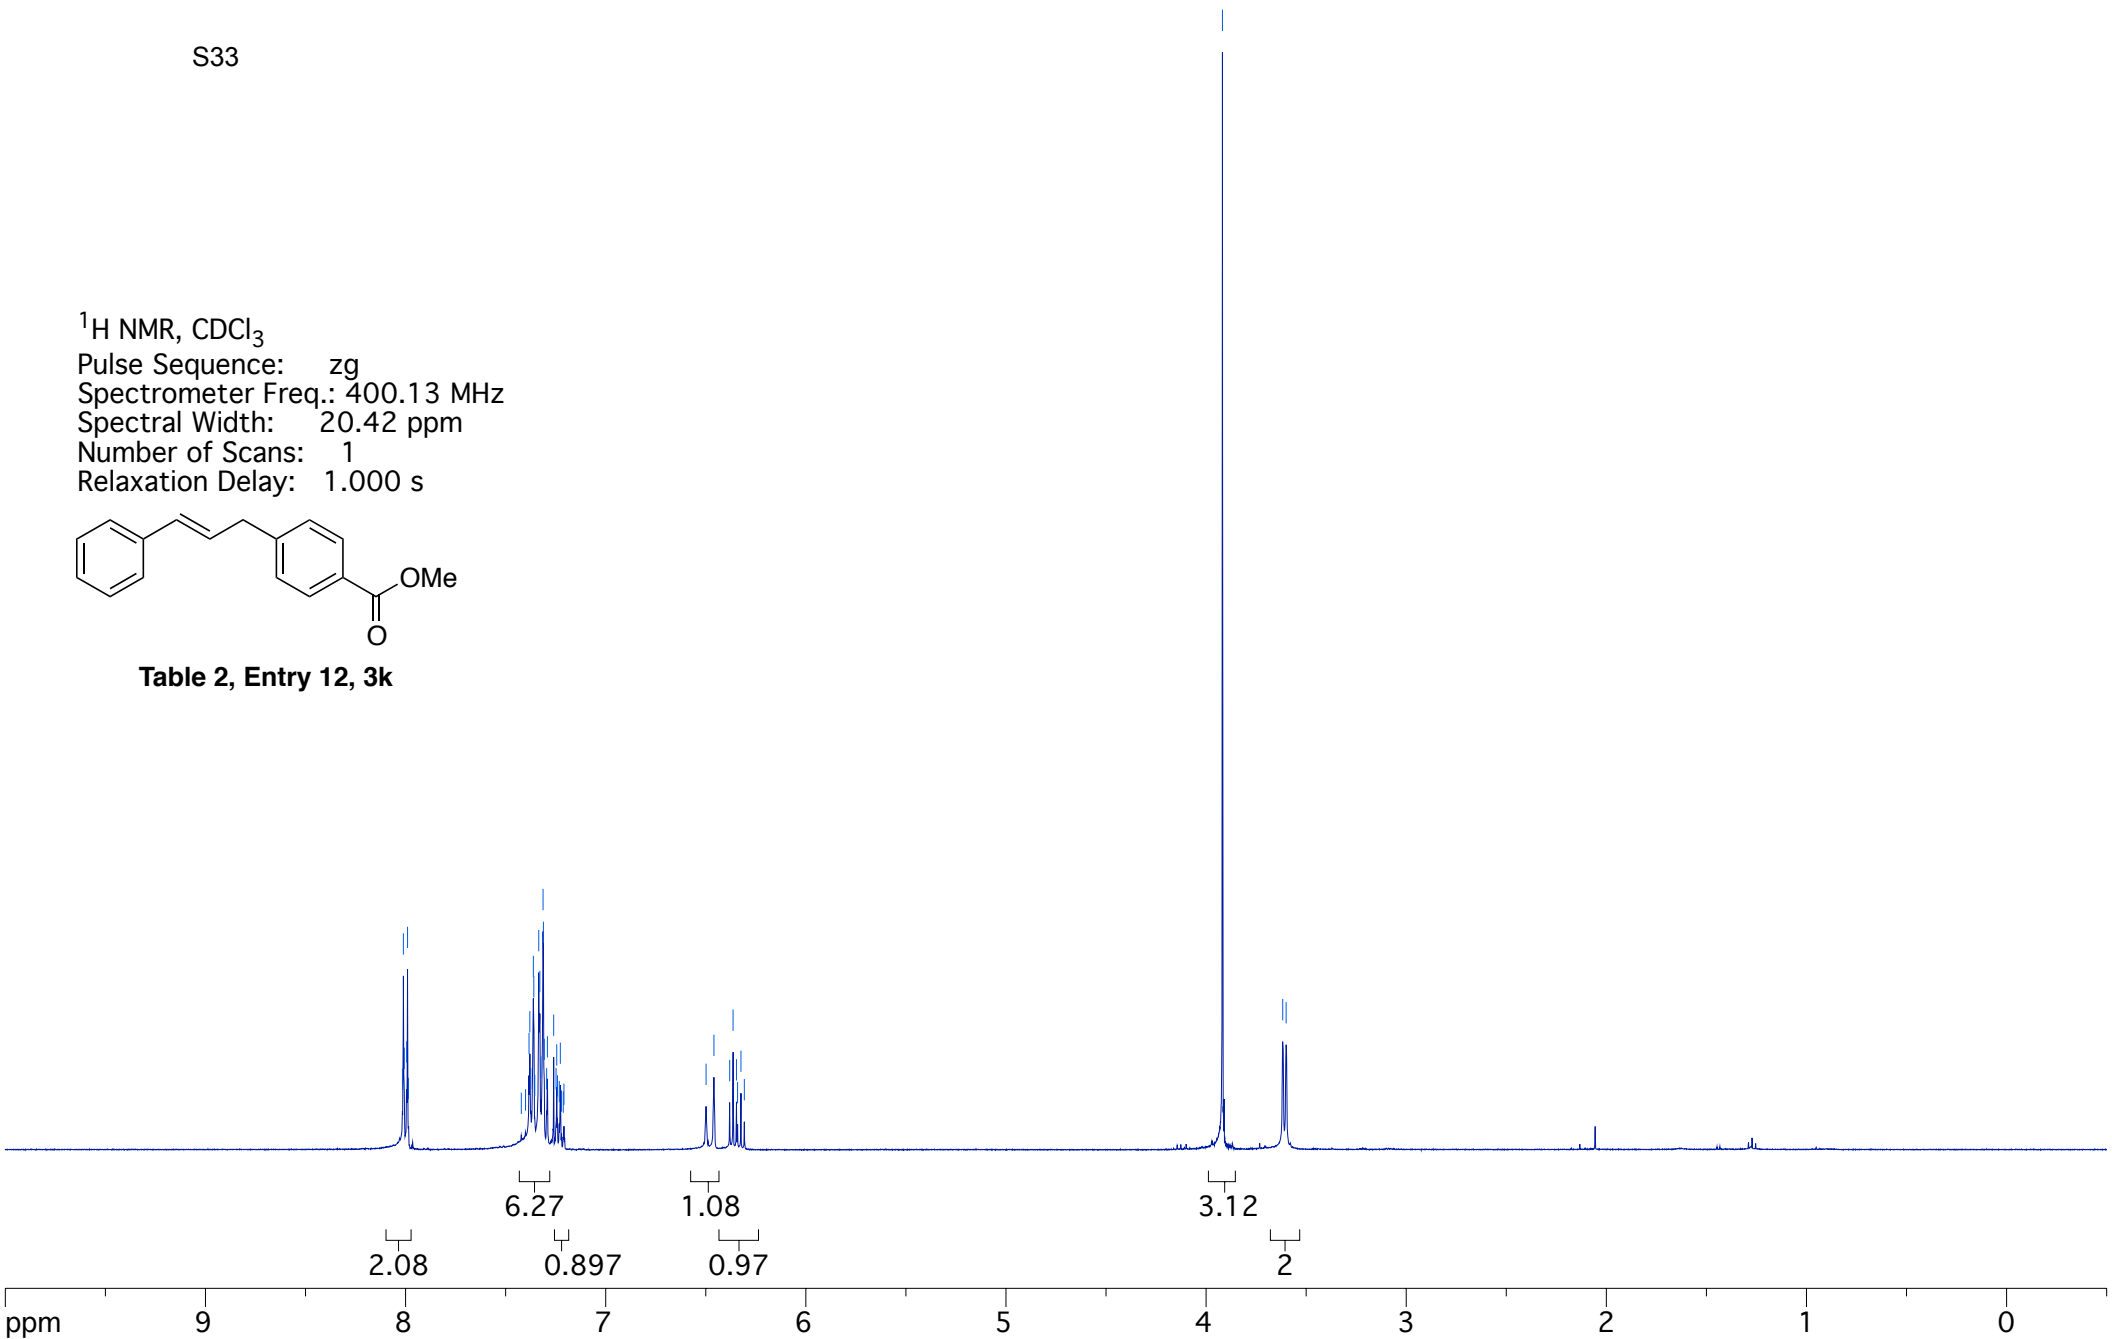

S34

$^{13}\text{C}$  NMR,  $\text{CDCl}_3$   
Pulse Sequence: zgdc  
Spectrometer Freq.: 100.62 MHz  
Spectral Width: 301.16 ppm  
Number of Scans: 112  
Relaxation Delay: 2.000 s

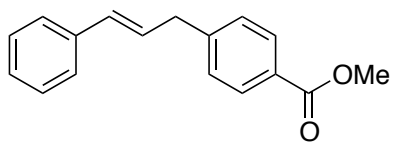

Table 2, Entry 12, 3k

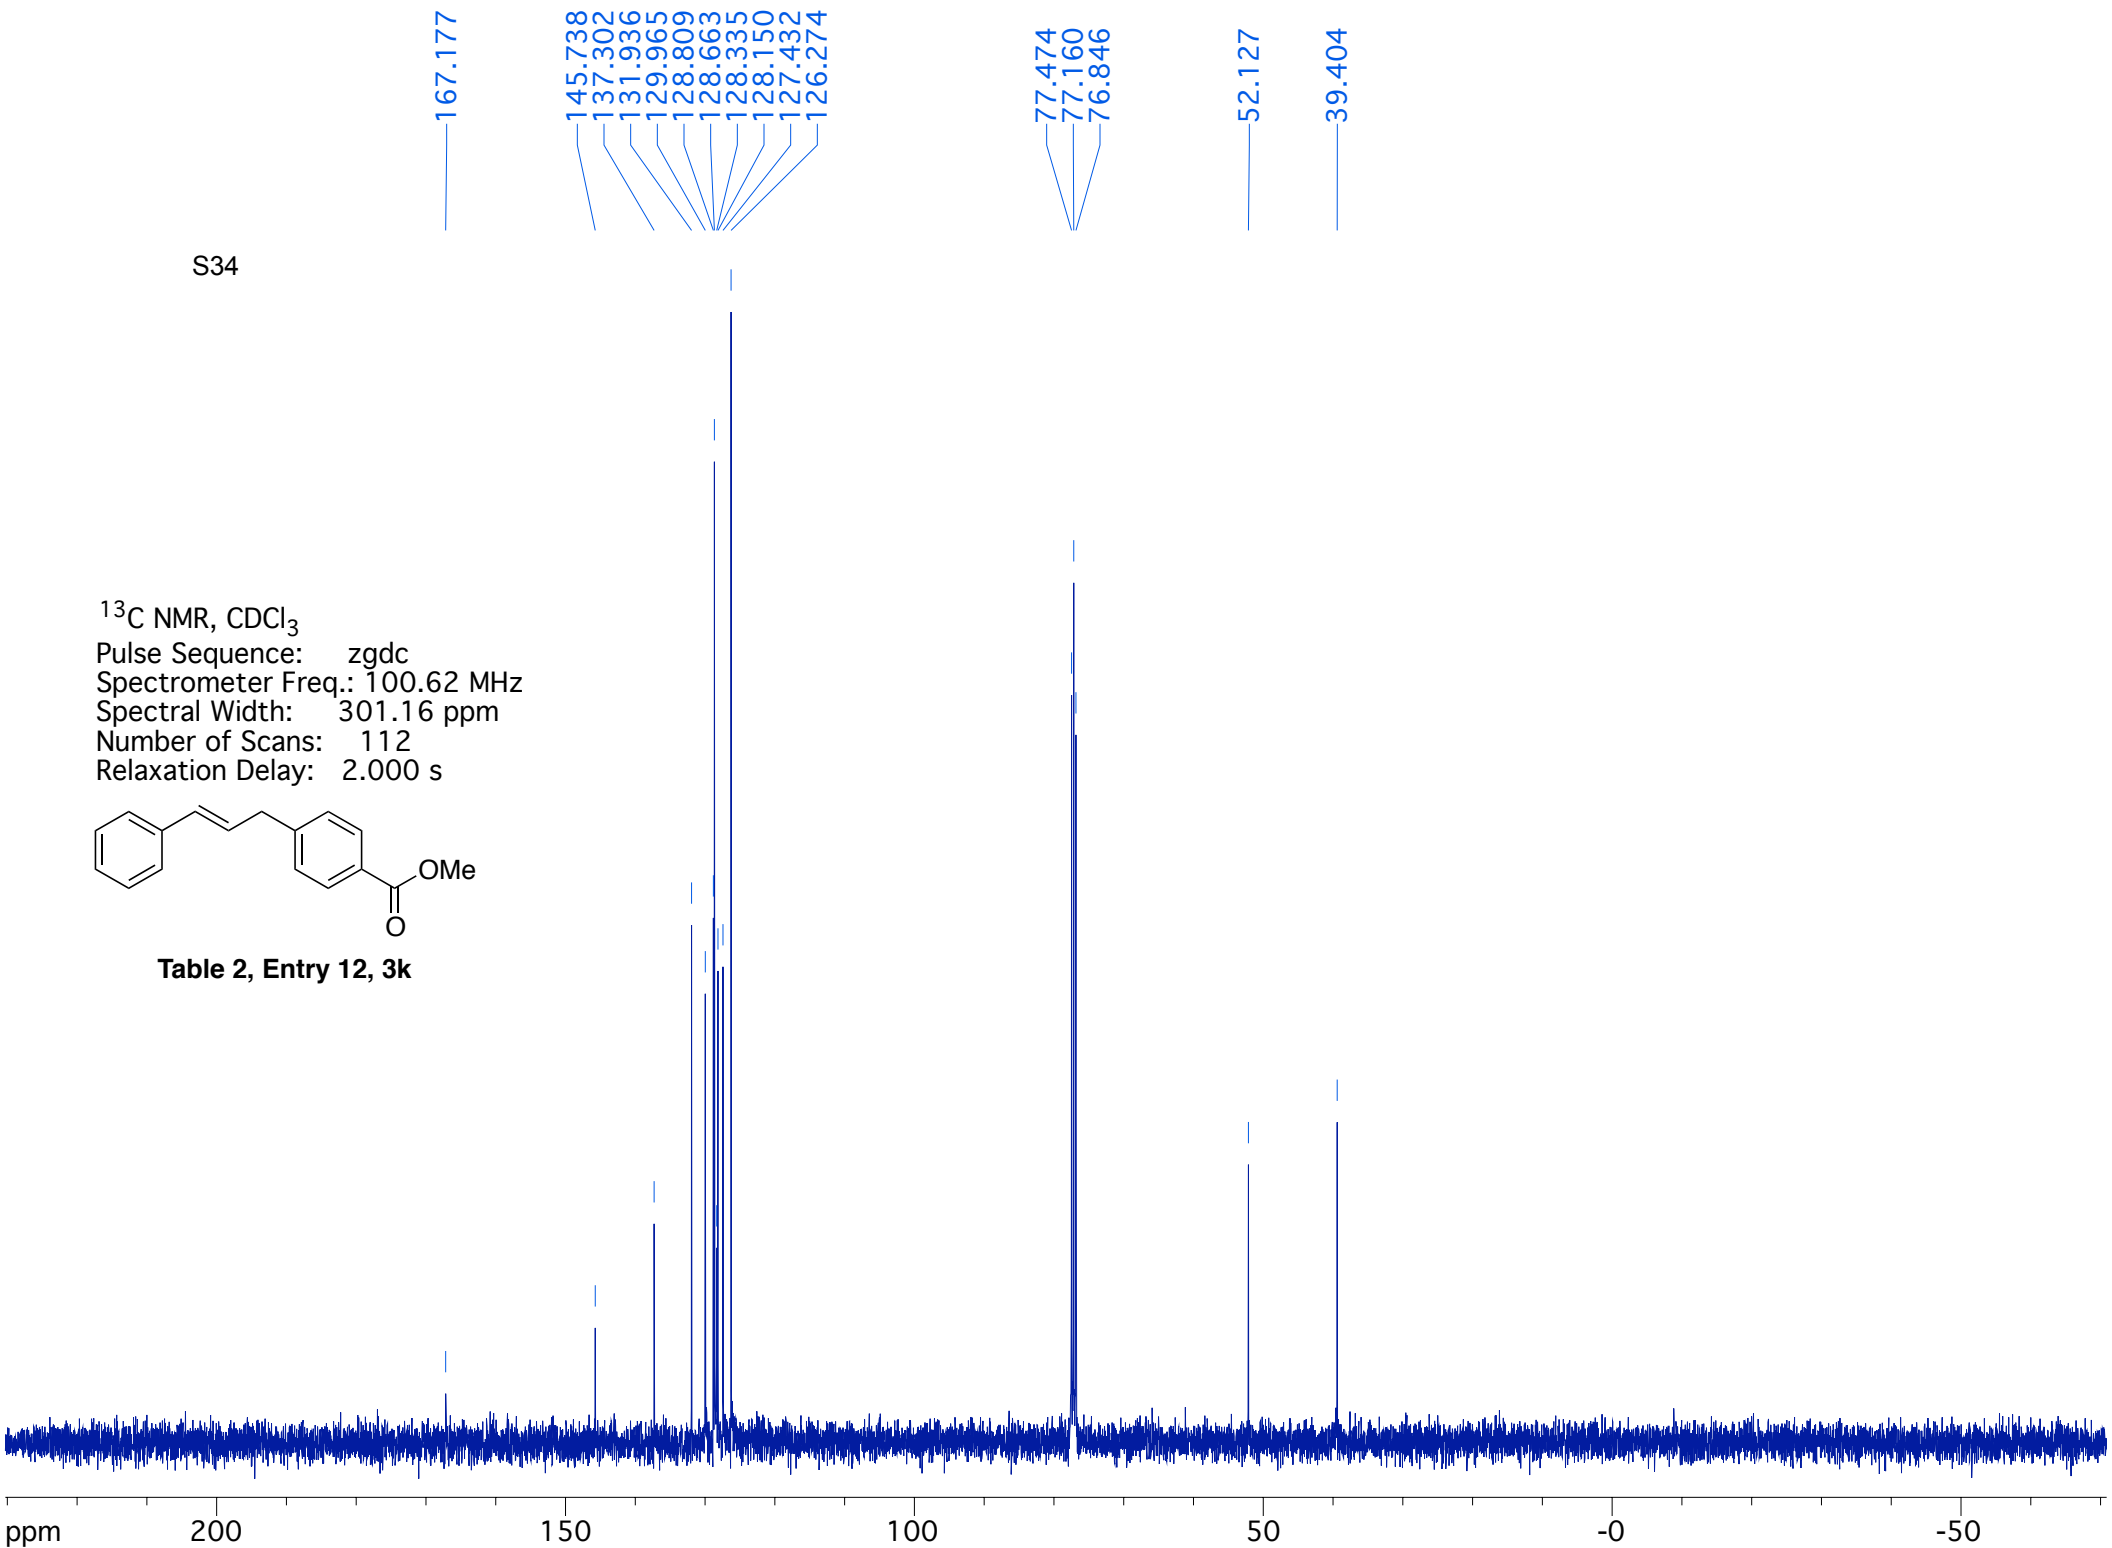

S35

<sup>1</sup>H NMR, CDCl<sub>3</sub>

Pulse Sequence: zg

Spectrometer Freq.: 400.13 MHz

Spectral Width: 20.42 ppm

Number of Scans: 1

Relaxation Delay: 1.000 s

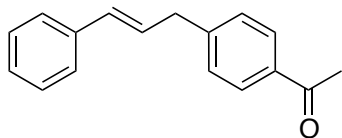

Table 2, Entry 13, 3b

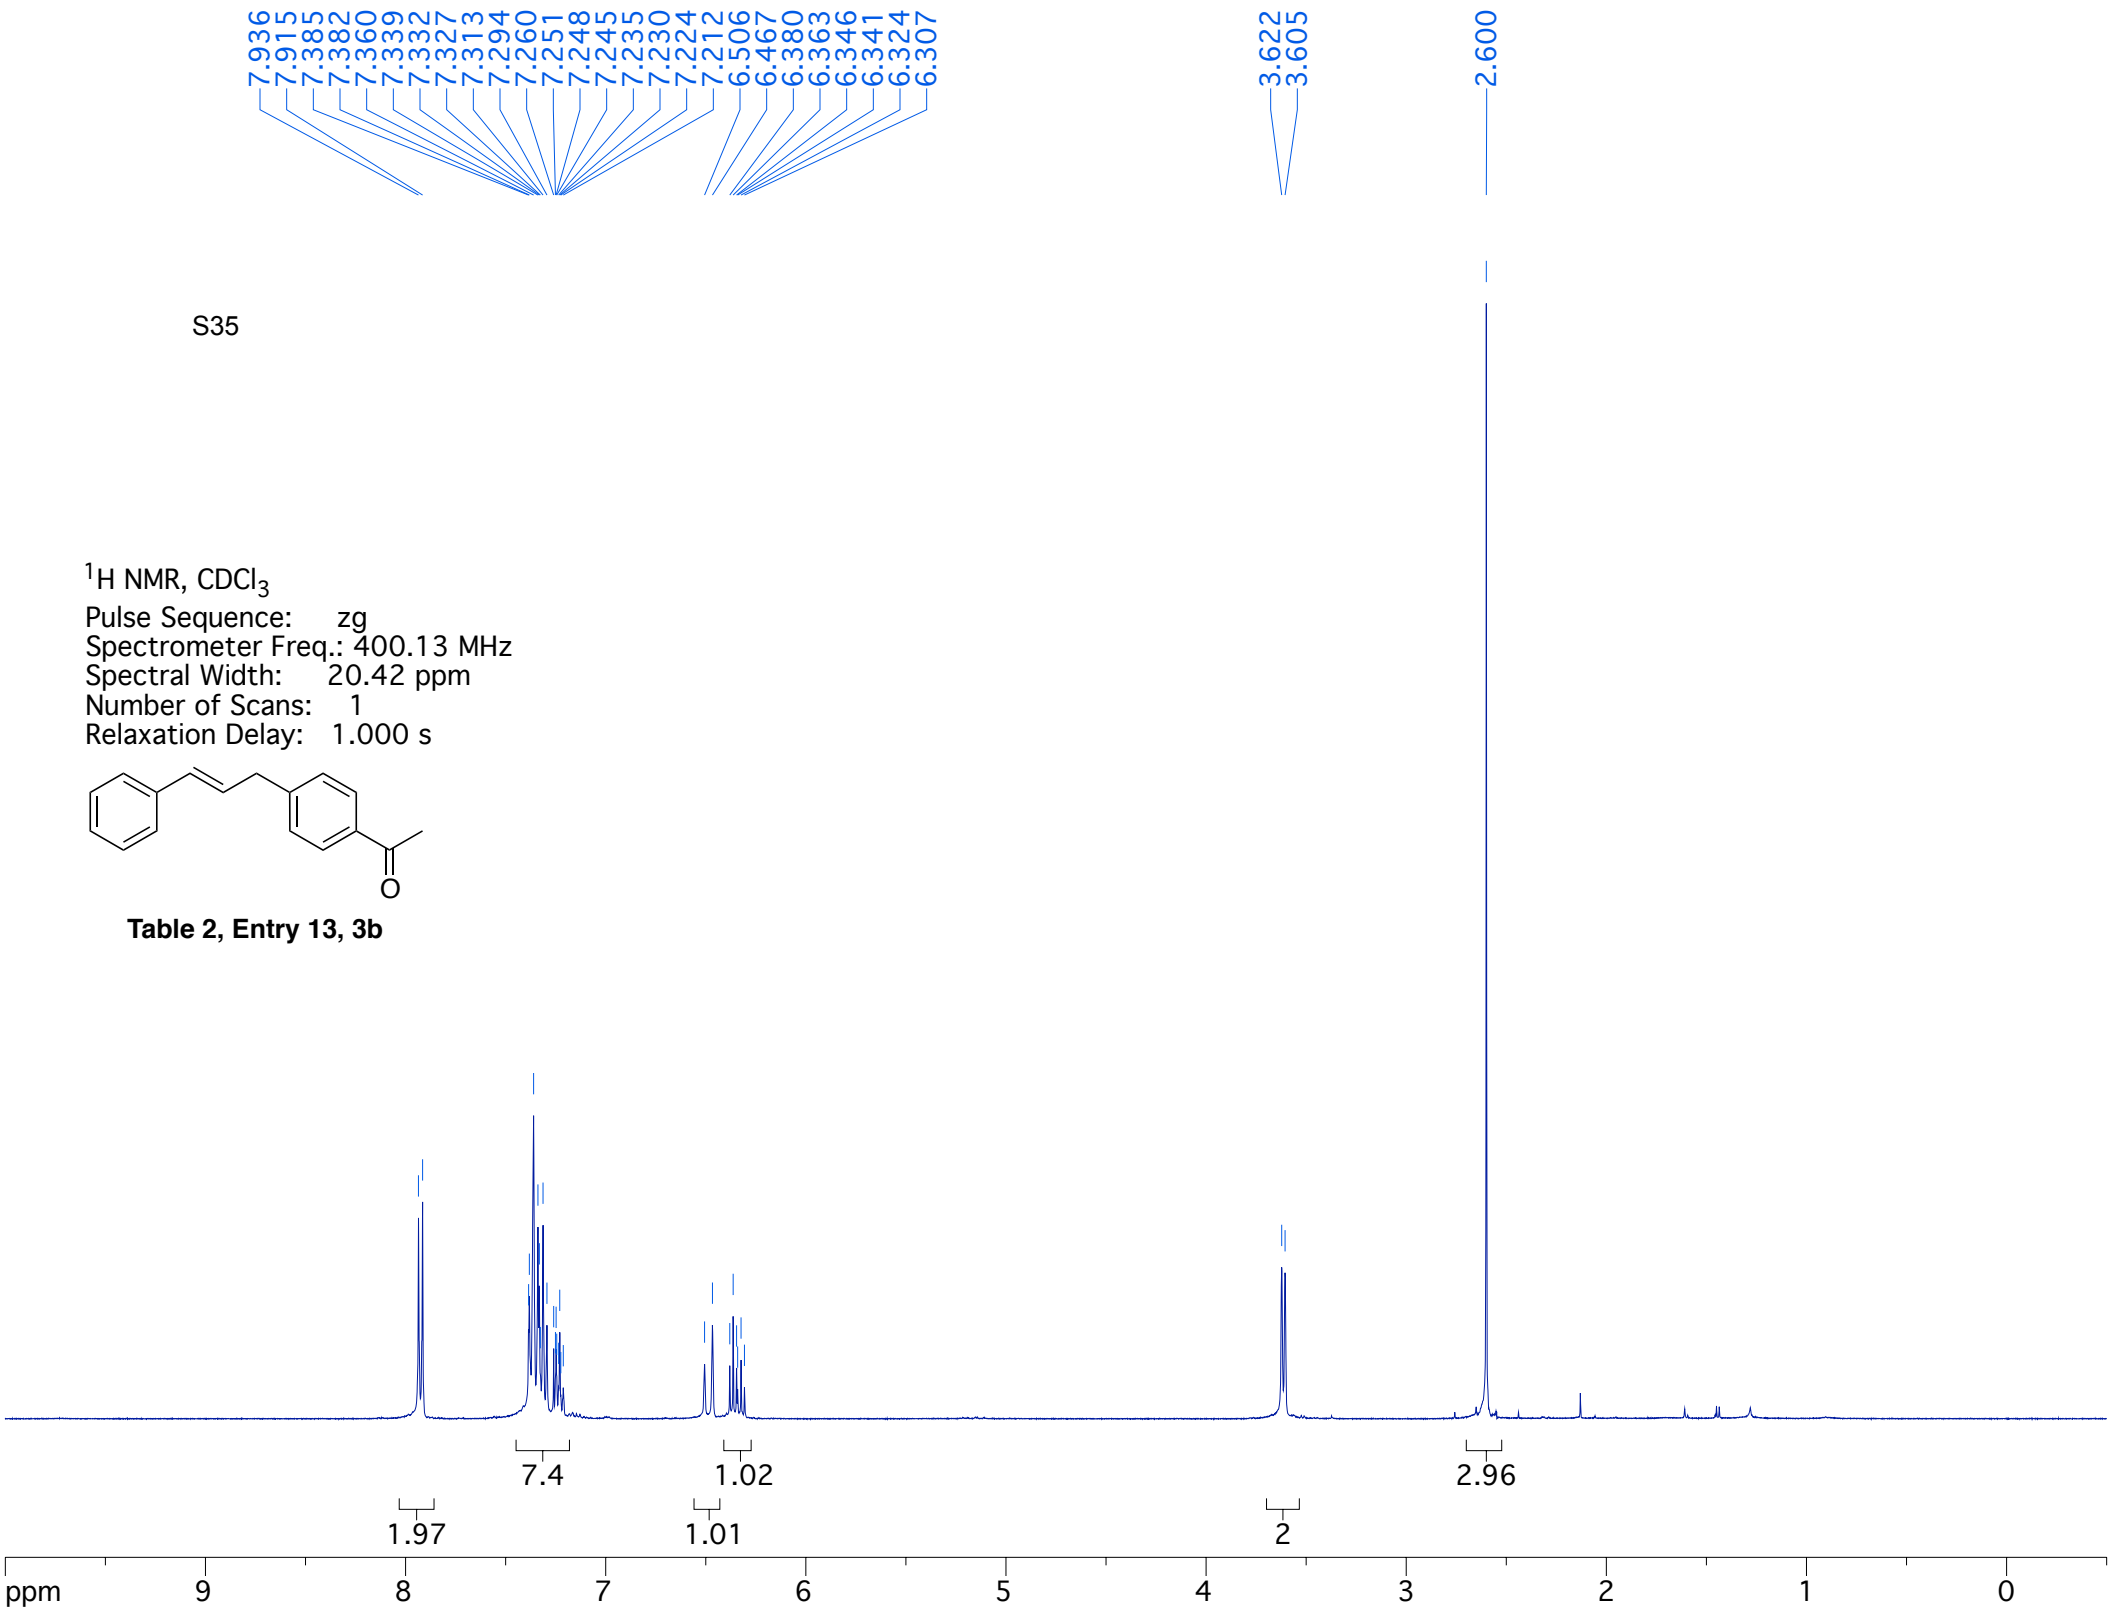

197.944  
S36

146.018  
137.249  
135.484  
131.973  
128.977  
128.775  
128.665  
128.021  
127.451  
126.256

77.474  
77.160  
76.843

39.355

26.704

<sup>13</sup>C NMR, CDCl<sub>3</sub>  
Pulse Sequence: zgdc  
Spectrometer Freq.: 100.62 MHz  
Spectral Width: 301.16 ppm  
Number of Scans: 112  
Relaxation Delay: 2.000 s

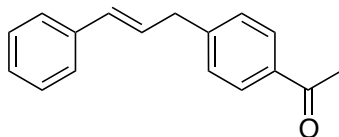

Table 2, Entry 13, 3b

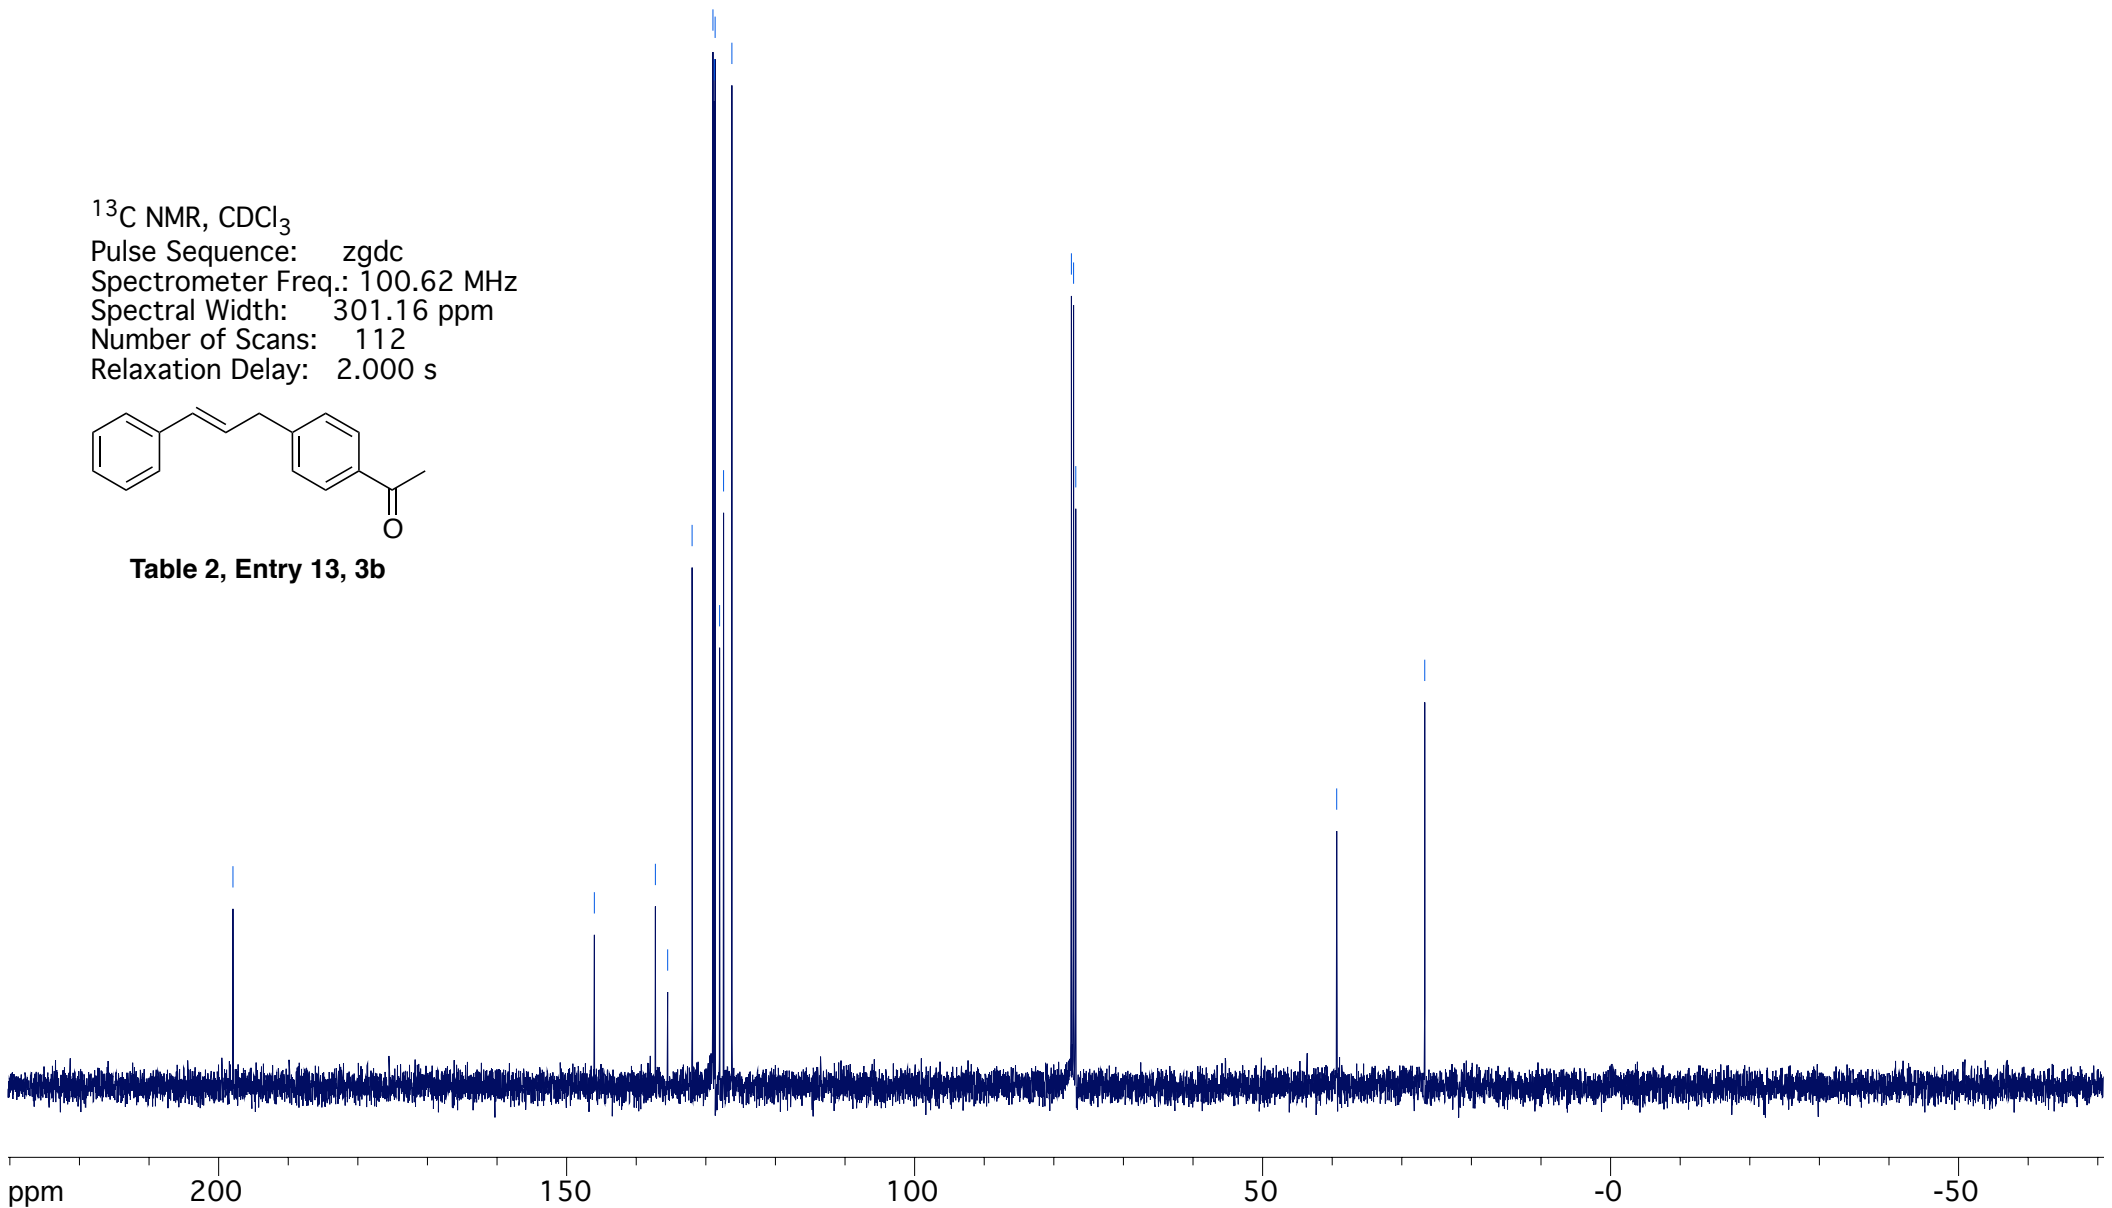

7.550  
7.529  
7.350  
7.347  
7.337  
7.329  
7.327  
7.317  
7.297  
7.293  
7.289  
7.279  
7.276  
7.260  
7.218  
7.215  
7.212  
7.202  
7.197  
7.179  
7.179  
6.471  
6.431  
6.335  
6.332  
6.318  
6.315  
6.301  
6.296  
6.279  
6.275  
6.262

3.582  
3.565

S37

<sup>1</sup>H NMR, CDCl<sub>3</sub>  
Pulse Sequence: zg  
Spectrometer Freq.: 400.13 MHz  
Spectral Width: 20.42 ppm  
Number of Scans: 1  
Relaxation Delay: 1.000 s

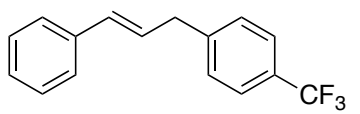

Table 2, Entry 14, 3I

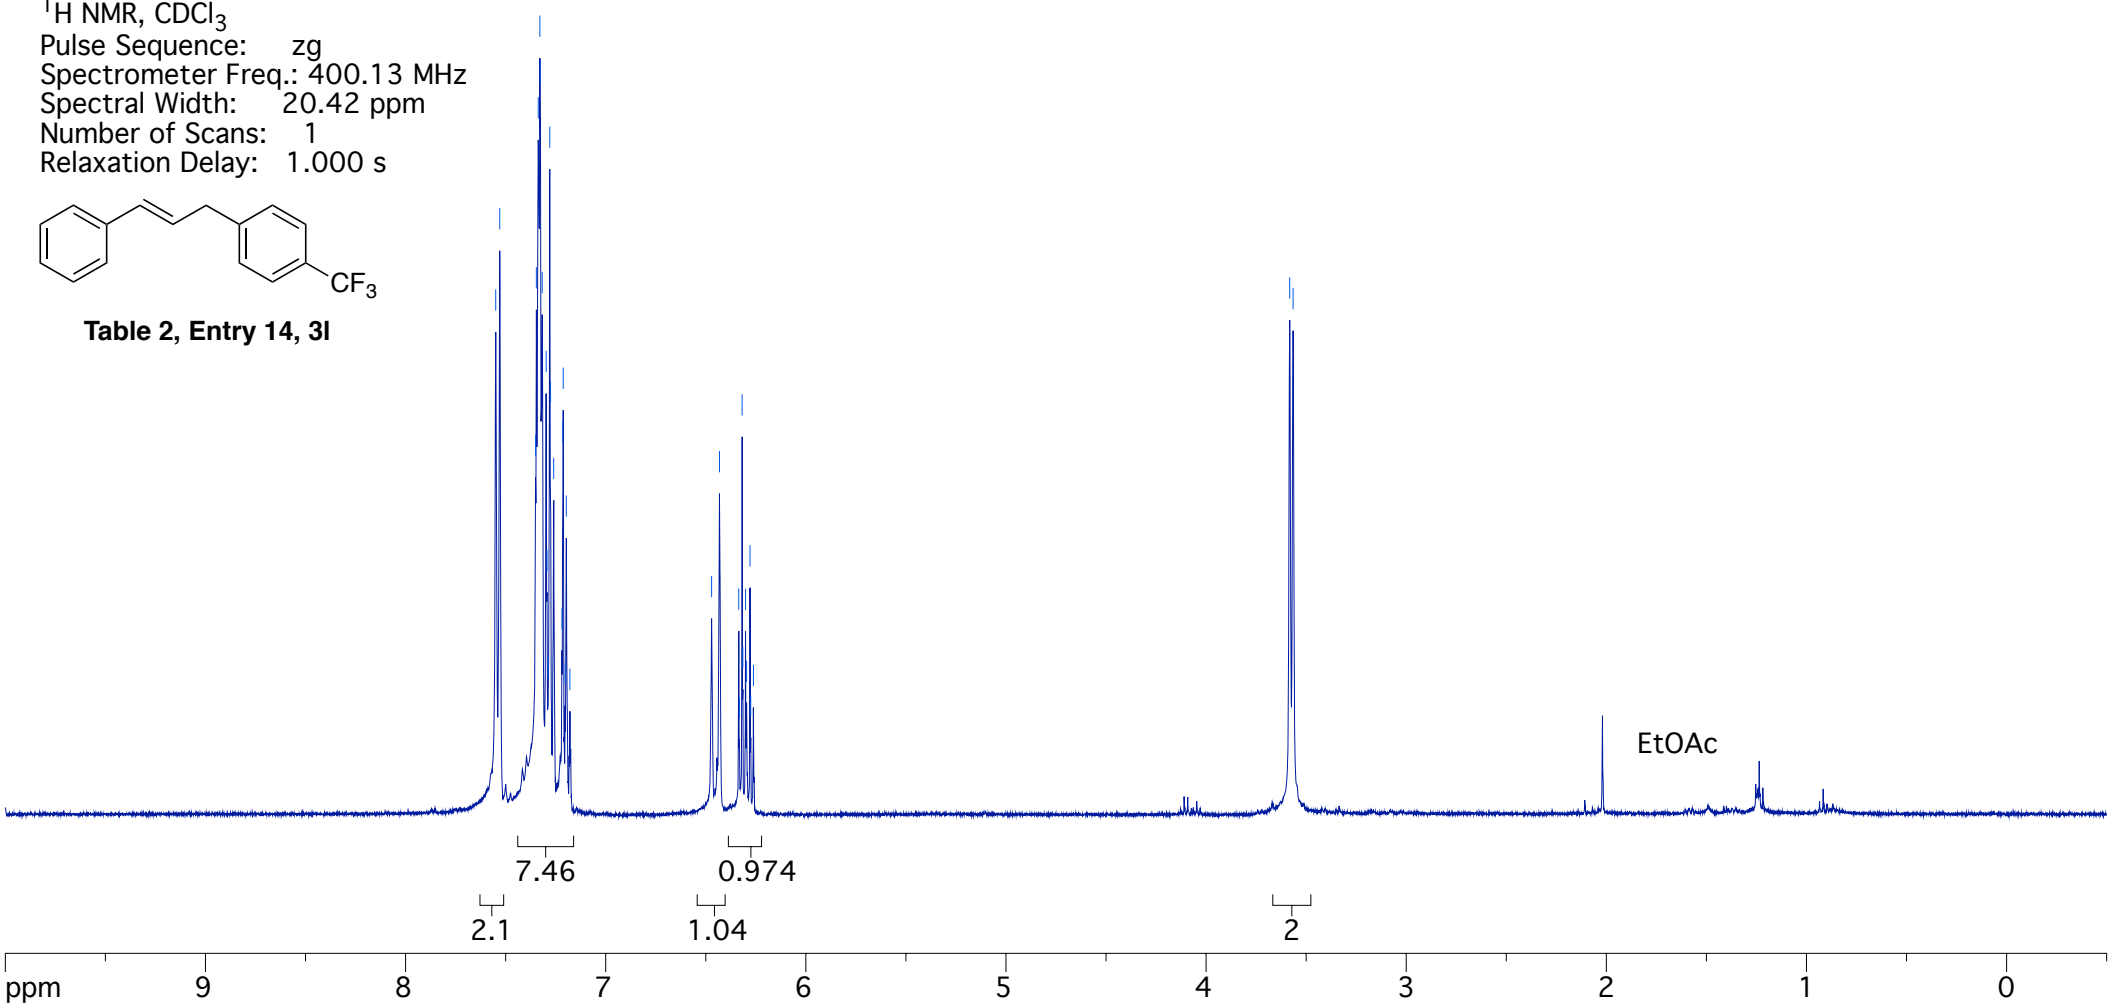



S38

$^{13}\text{C}$  NMR,  $\text{CDCl}_3$   
Pulse Sequence: zgdc  
Spectrometer Freq.: 100.62 MHz  
Spectral Width: 301.16 ppm  
Number of Scans: 209  
Relaxation Delay: 2.000 s

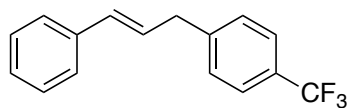

Table 2, Entry 14, 3I

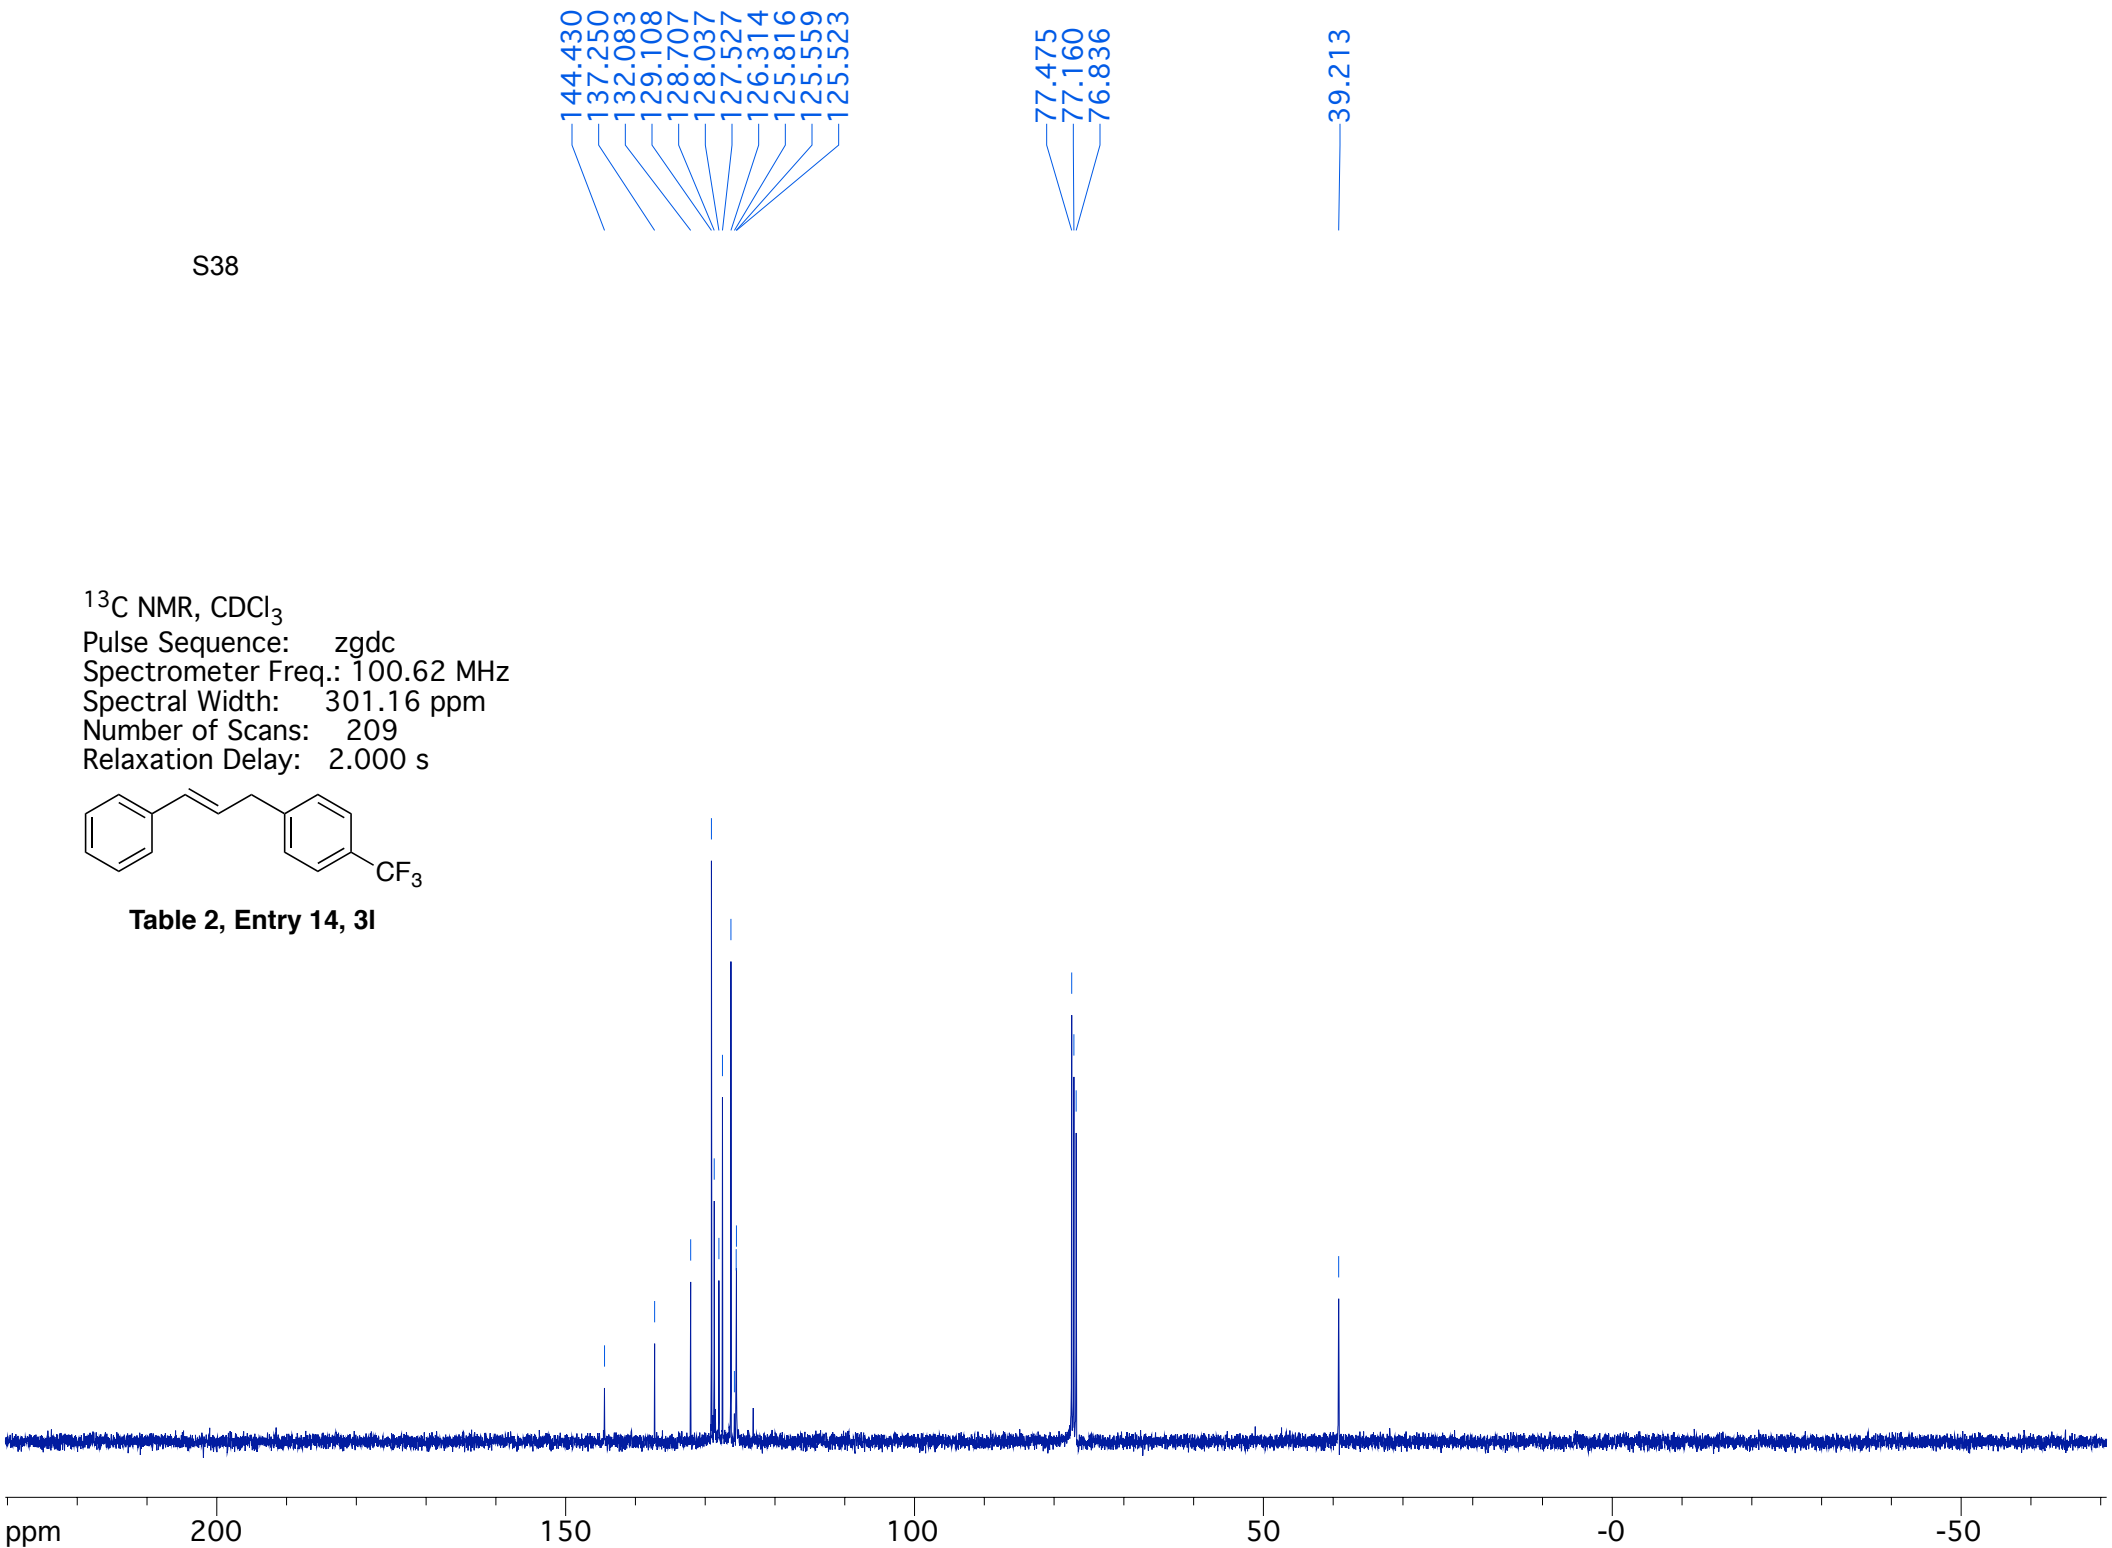

-62.748

S39

$^{19}\text{F}$  NMR,  $\text{CDCl}_3$   
Pulse Sequence: zg  
Spectrometer Freq.: 376.50 MHz  
Spectral Width: 199.70 ppm  
Number of Scans: 4  
Relaxation Delay: 1.000 s

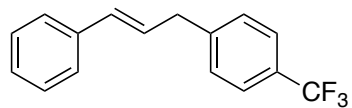

Table 2, Entry 14, 3I

ppm

50

-0

-50

7.578  
7.574  
7.570  
7.558  
7.553  
7.549  
7.343  
7.339  
7.326  
7.322  
7.306  
7.298  
7.293  
7.280  
7.276  
7.271  
7.269  
7.260  
7.220  
7.215  
7.207  
7.201  
7.195  
7.187  
7.183  
7.180  
6.467  
6.427  
6.301  
6.284  
6.267  
6.262  
6.245  
6.227

3.579  
3.562

S40

<sup>1</sup>H NMR, CDCl<sub>3</sub>  
Pulse Sequence: zg  
Spectrometer Freq.: 400.13 MHz  
Spectral Width: 20.42 ppm  
Number of Scans: 1  
Relaxation Delay: 1.000 s

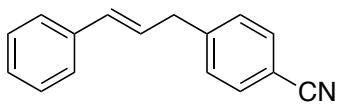

Table 2, Entry 15, 3m

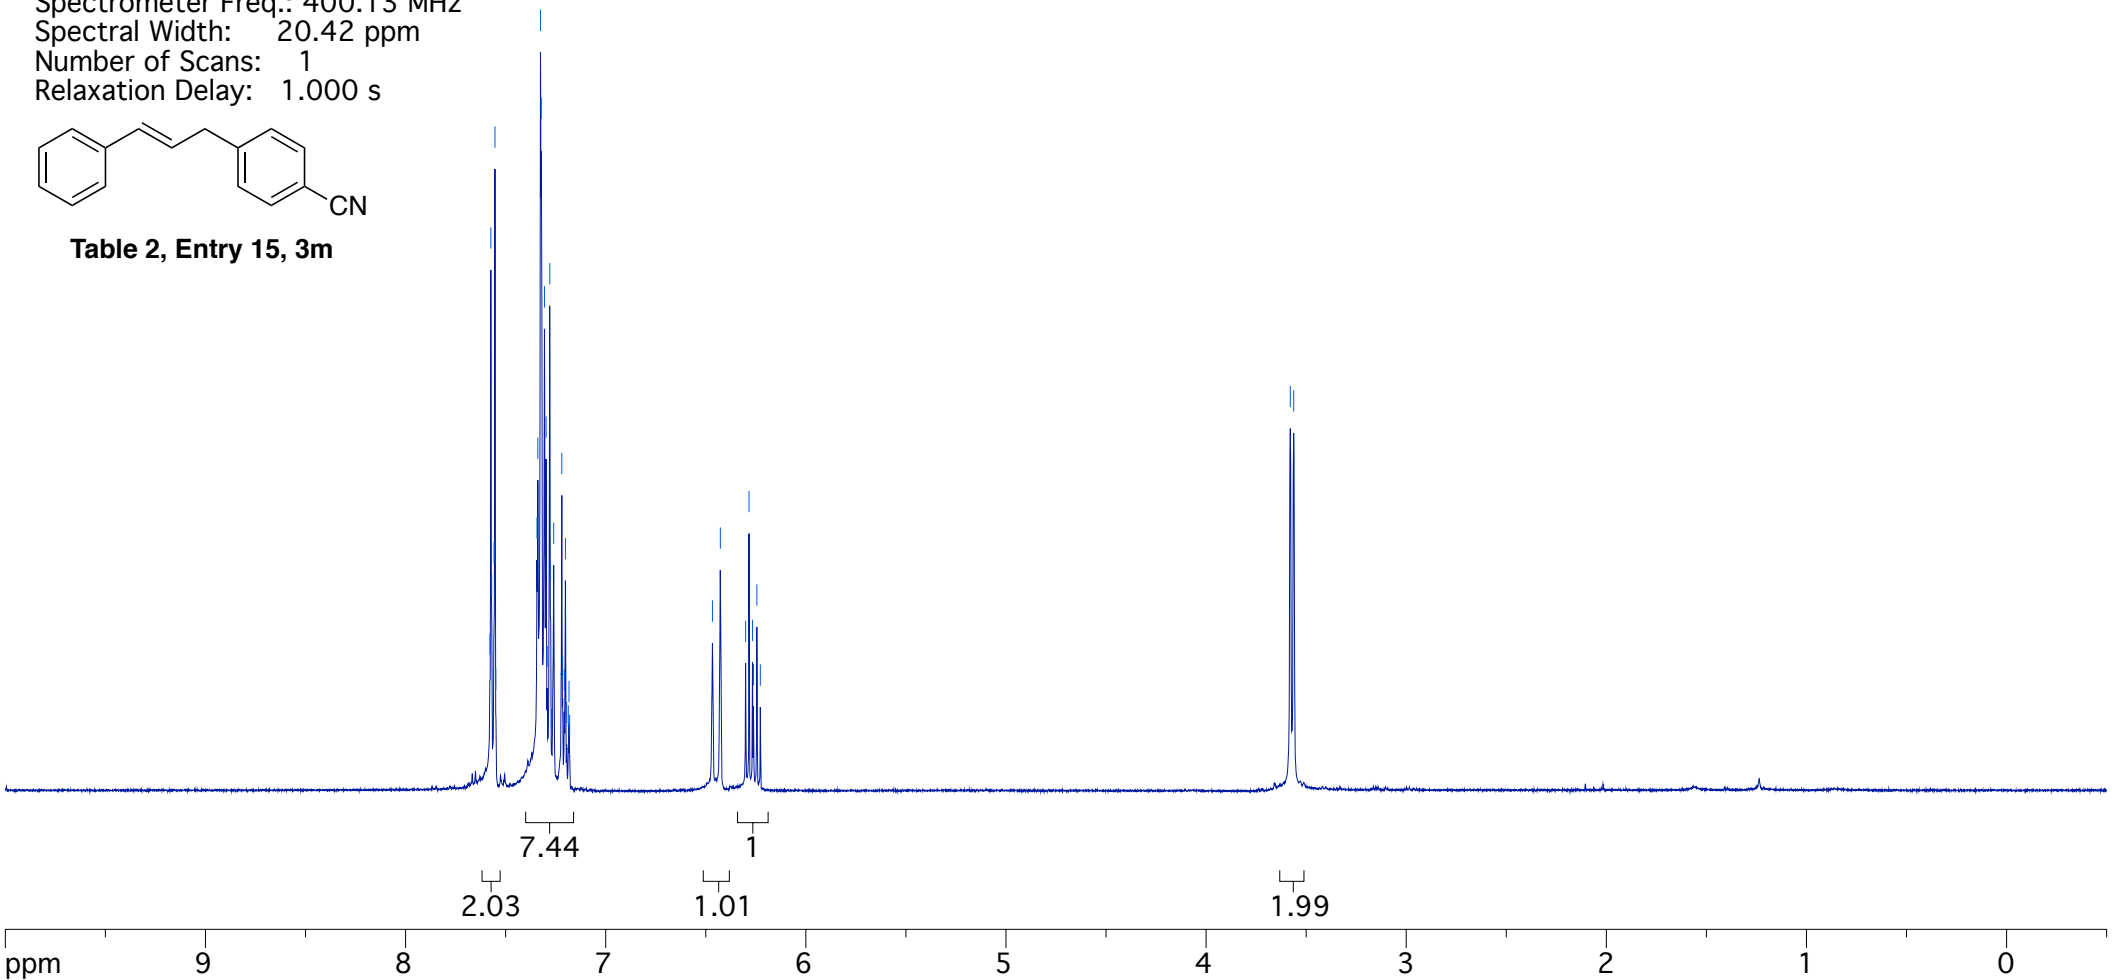

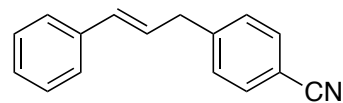

Table 2, Entry 15, 3m

<sup>13</sup>C NMR, CDCl<sub>3</sub>  
Pulse Sequence: zgdc  
Spectrometer Freq.: 100.62 MHz  
Spectral Width: 301.16 ppm  
Number of Scans: 138  
Relaxation Delay: 2.000 s

S41

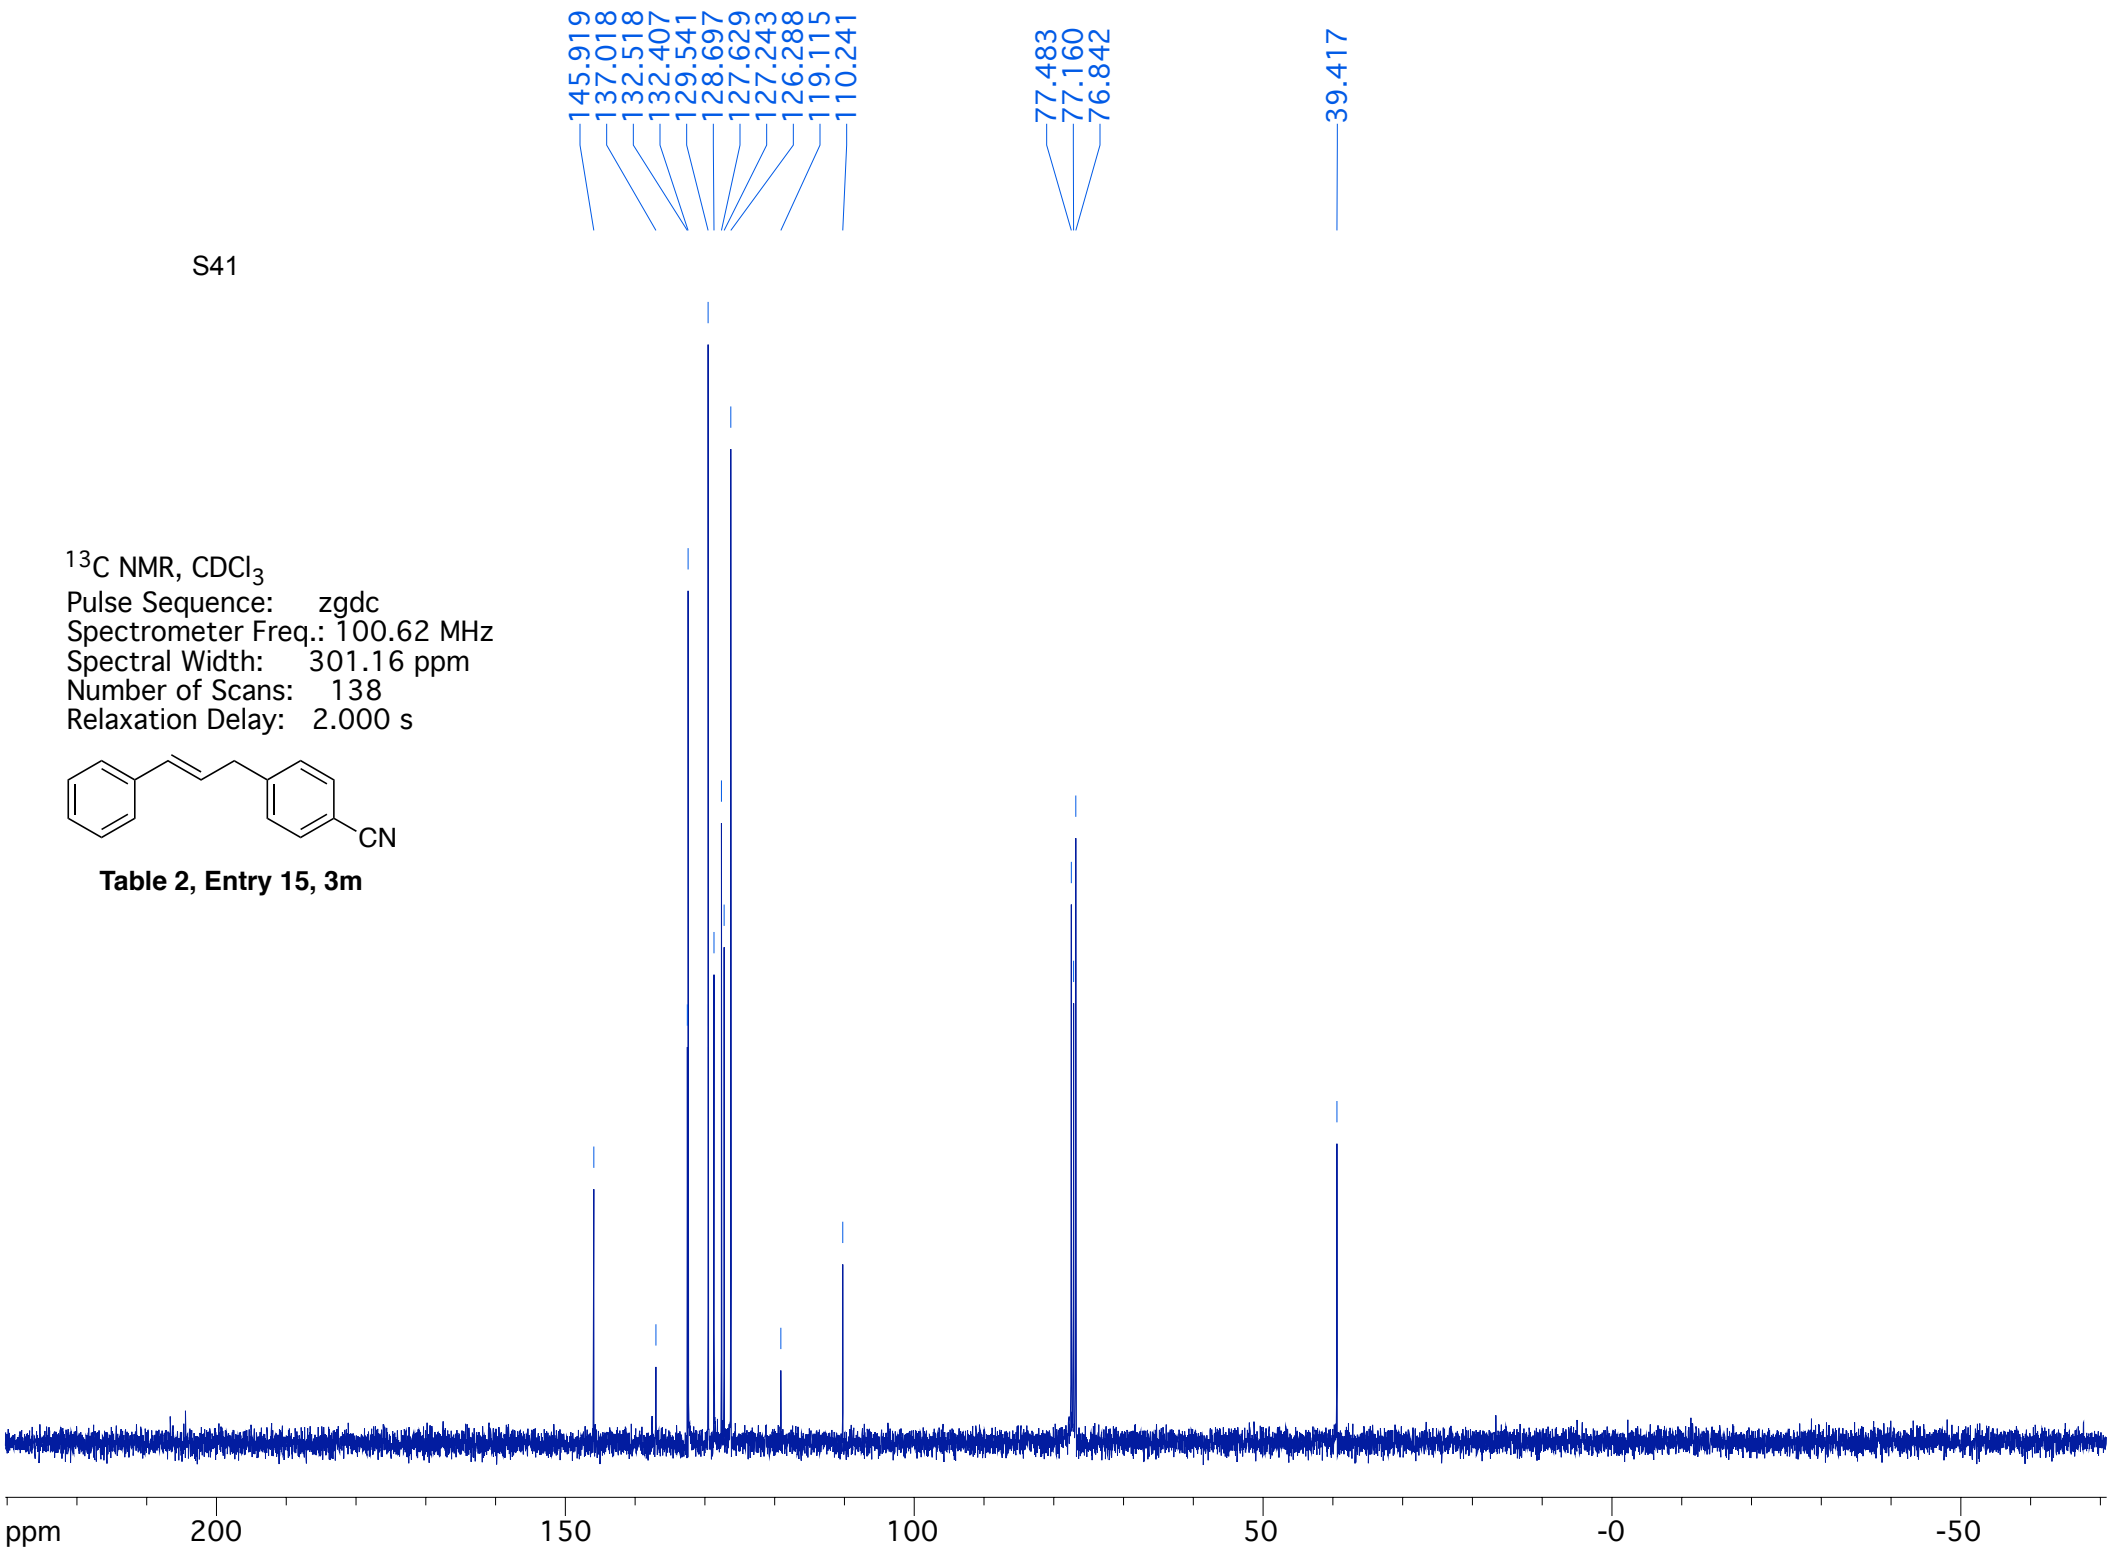

7.416  
7.413  
7.399  
7.397  
7.349  
7.334  
7.319  
7.287  
7.261  
7.258  
7.245  
7.231  
7.106  
7.104  
7.103  
7.101  
7.100  
7.099  
7.086  
7.085  
7.084  
7.072  
7.071  
6.518  
6.487  
6.426  
6.413  
6.399  
6.395  
6.381  
6.368

3.567  
3.553

2.382

S42

<sup>1</sup>H NMR, CDCl<sub>3</sub>  
Pulse Sequence: zg  
Spectrometer Freq.: 500.13 MHz  
Spectral Width: 19.99 ppm  
Number of Scans: 16  
Relaxation Delay: 1.000 s

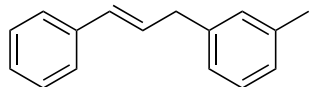

Table 2, Entry 16, 3n

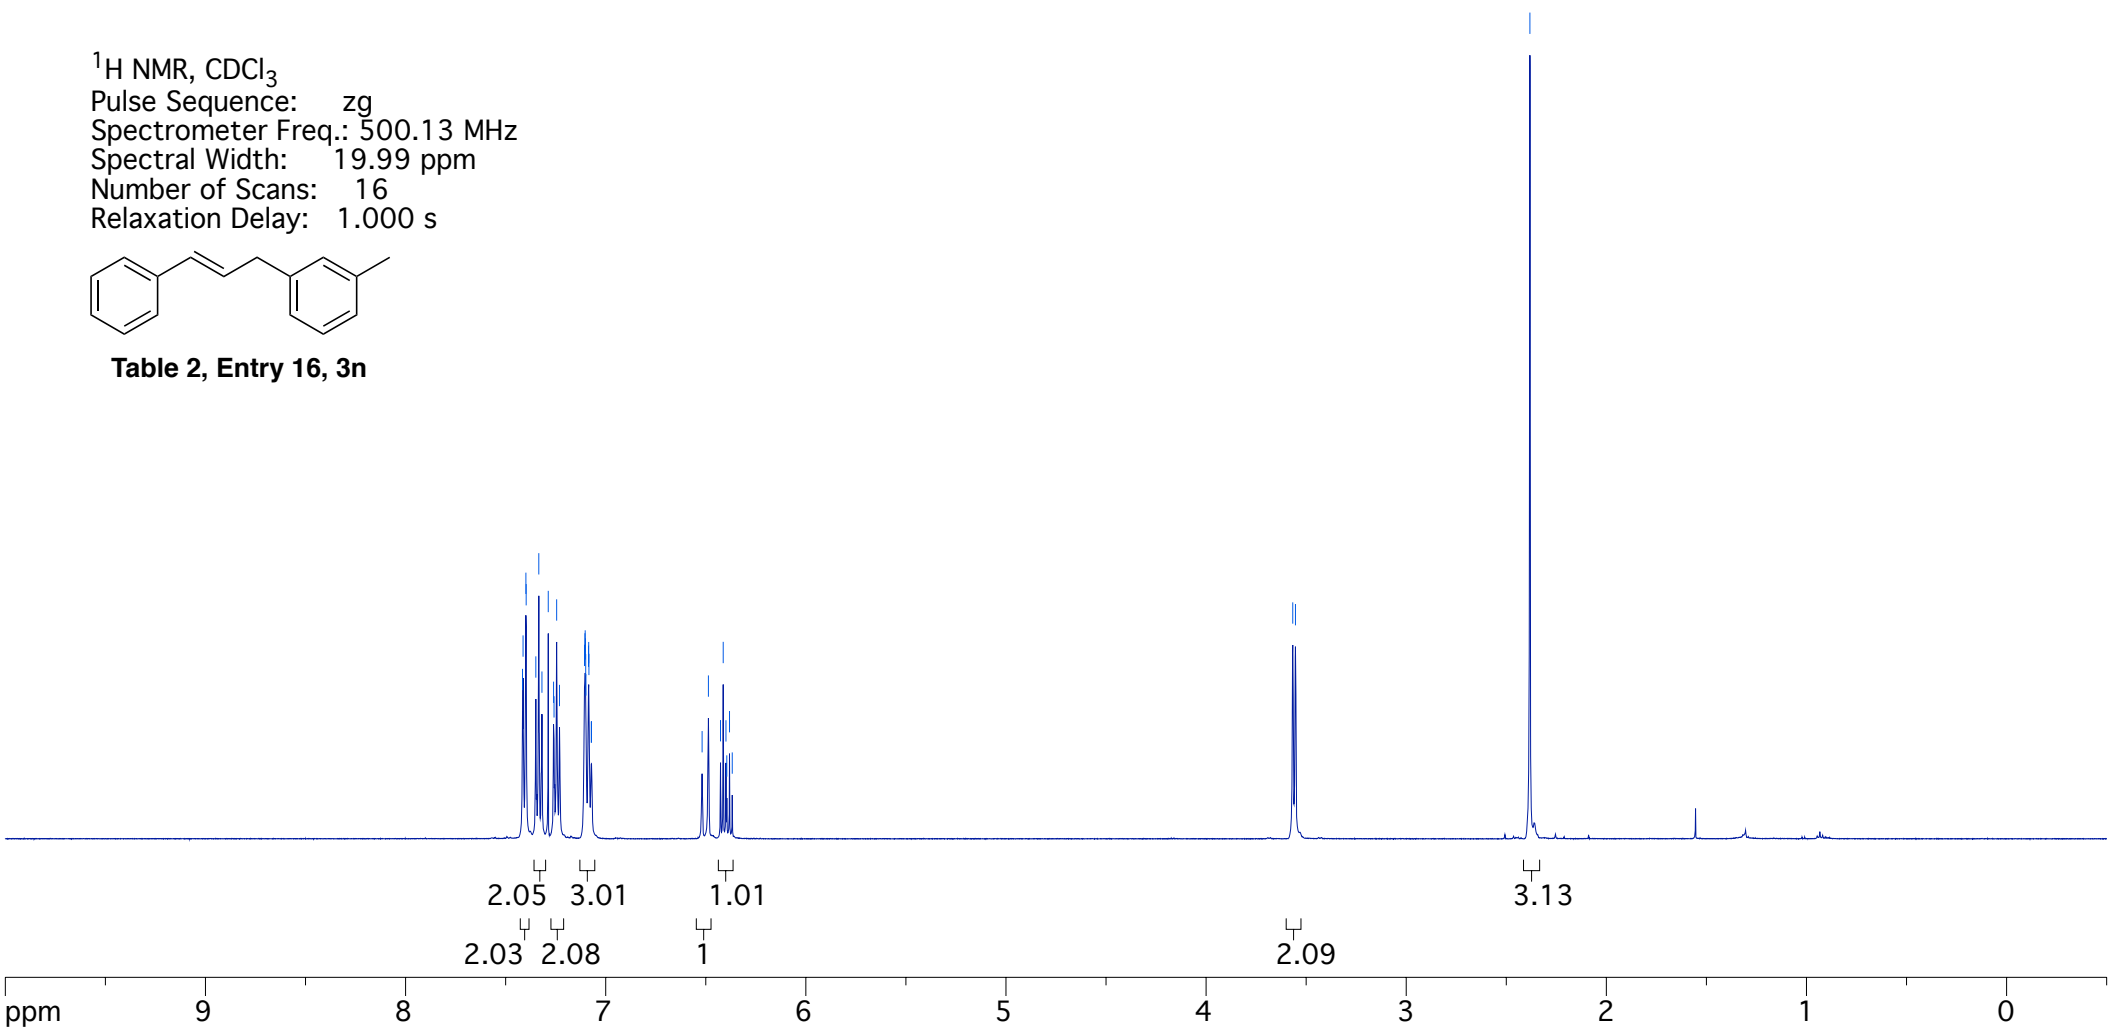

<sup>13</sup>C NMR, CDCl<sub>3</sub>  
Pulse Sequence: zgdc  
Spectrometer Freq.: 125.77 MHz  
Spectral Width: 301.18 ppm  
Number of Scans: 222  
Relaxation Delay: 2.000 s

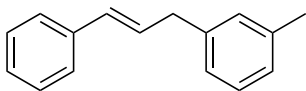

Table 2, Entry 16, 3n

S43

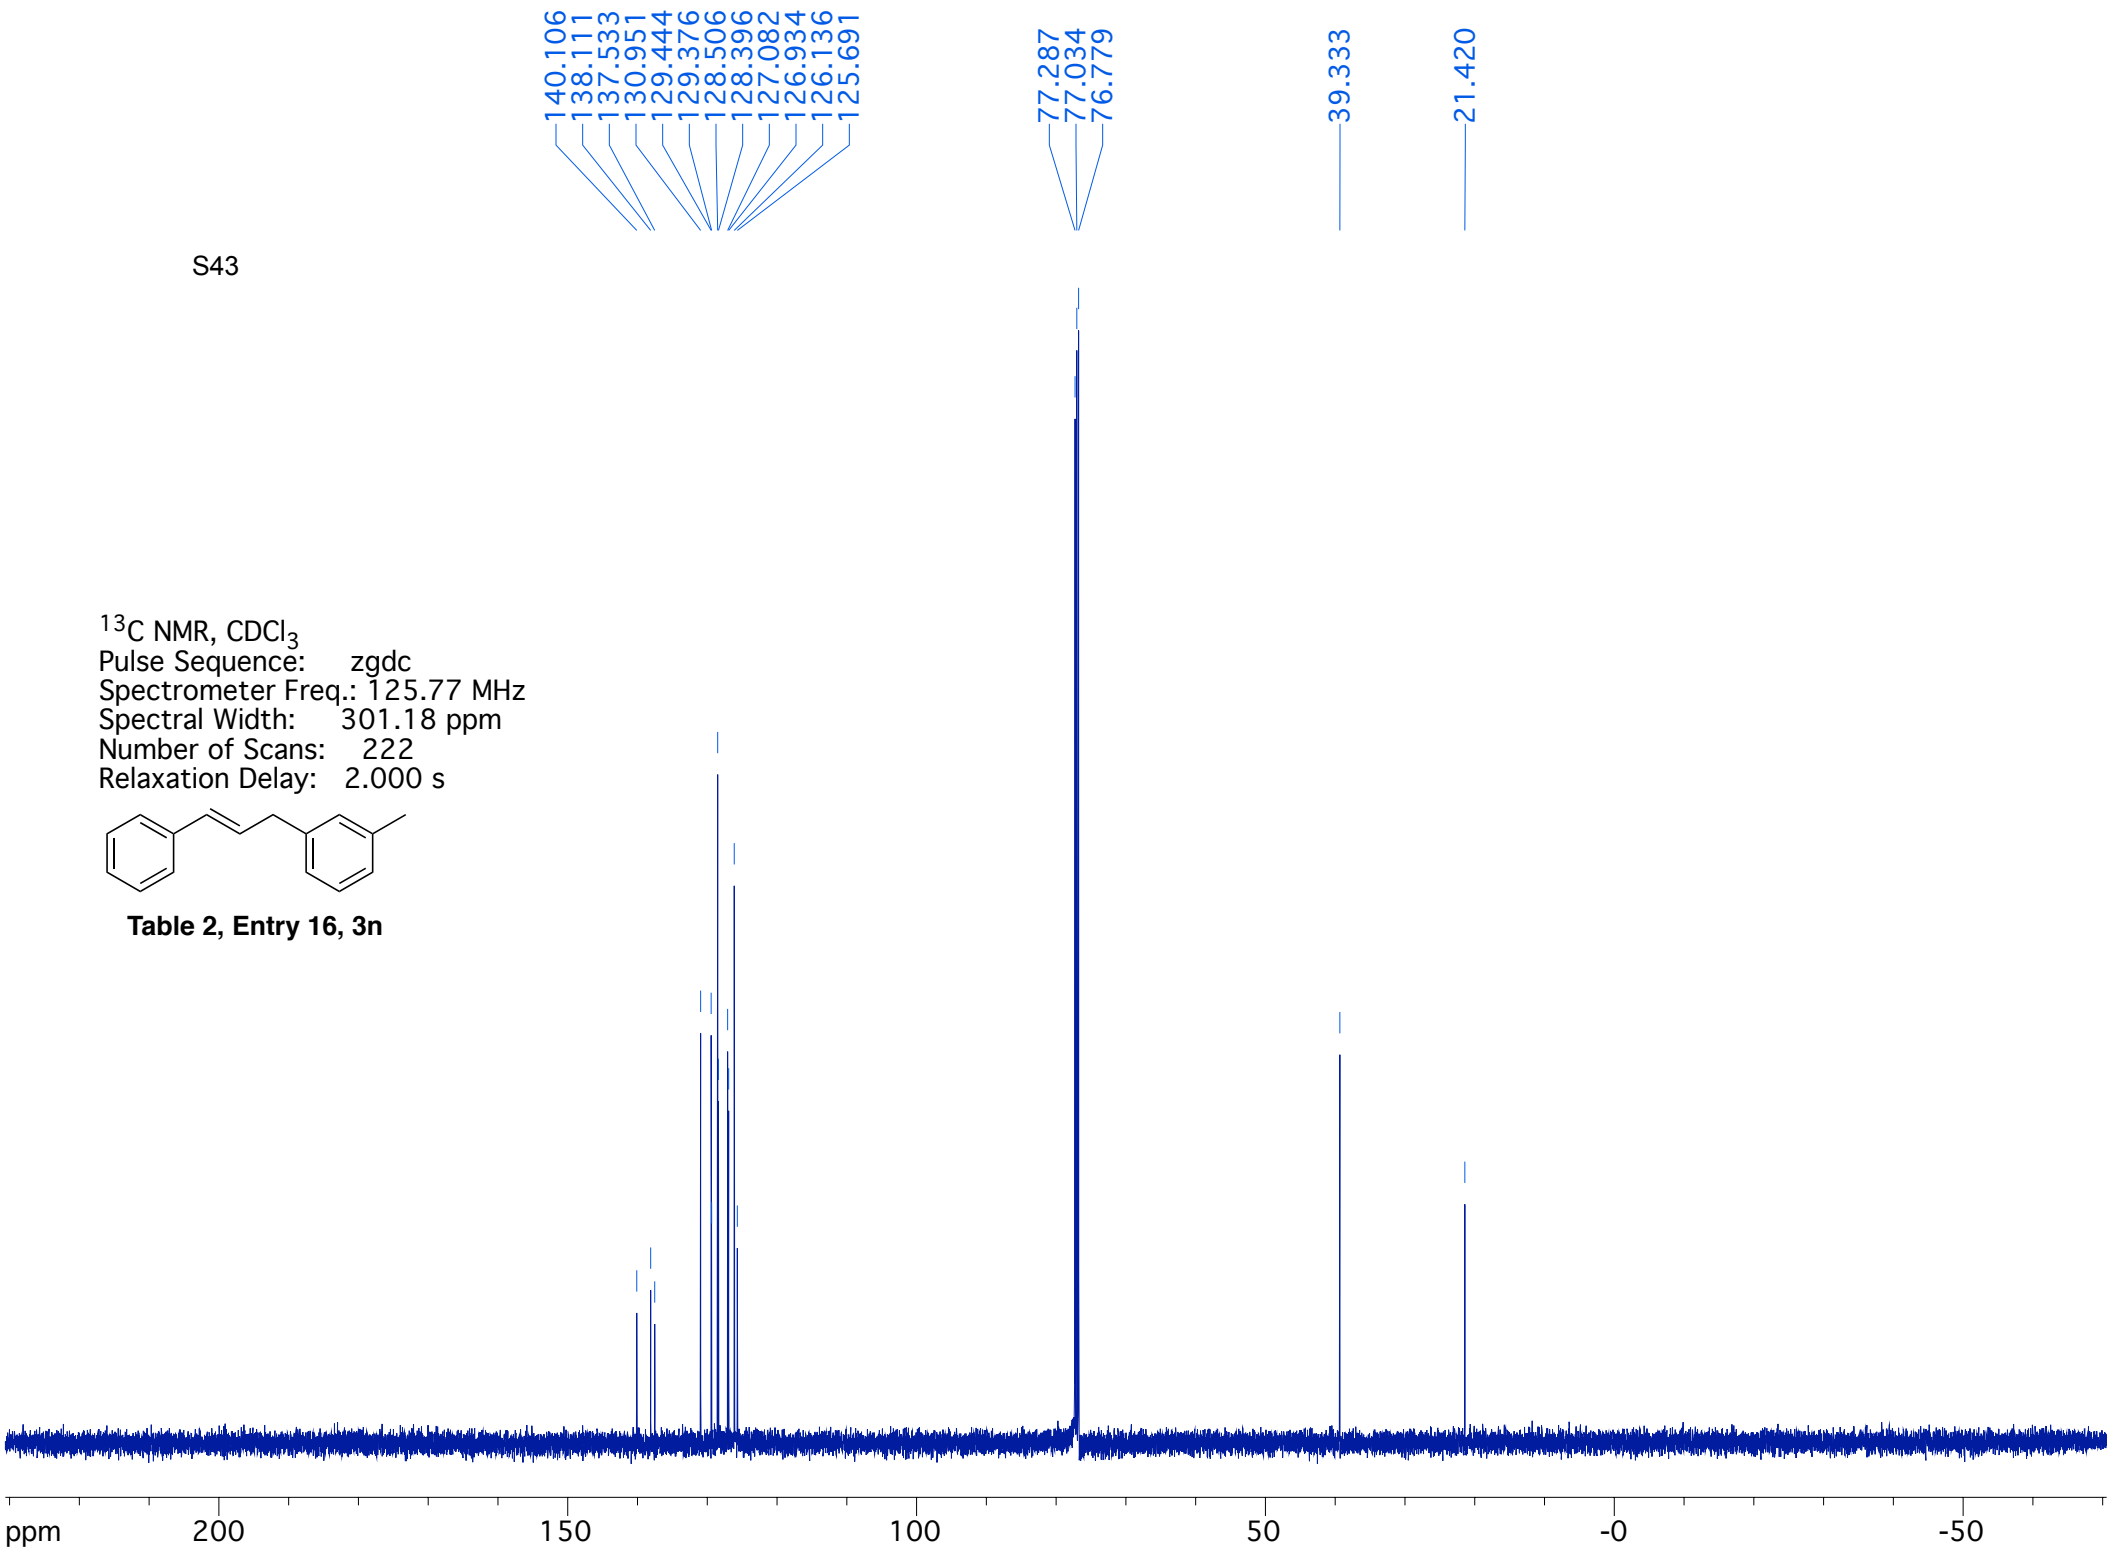

7.712  
7.711  
7.710  
7.697  
7.696  
7.694  
7.611  
7.609  
7.596  
7.594  
7.581  
7.578  
7.463  
7.462  
7.461  
7.447  
7.446  
7.445  
7.429  
7.426  
7.422  
7.412  
7.411  
7.395  
7.394  
7.380  
7.371  
7.366  
7.365  
7.364  
7.356  
7.340  
7.314  
7.313  
7.292  
7.278  
7.274  
7.263  
6.596  
6.564  
6.403  
6.389  
6.375  
6.371  
6.358  
6.344  
3.838  
3.825

1.604

S44

<sup>1</sup>H NMR, CDCl<sub>3</sub>  
Pulse Sequence: zg  
Spectrometer Freq.: 500.13 MHz  
Spectral Width: 19.99 ppm  
Number of Scans: 16  
Relaxation Delay: 1.000 s

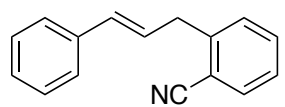

Table 2, Entry 17, 3o

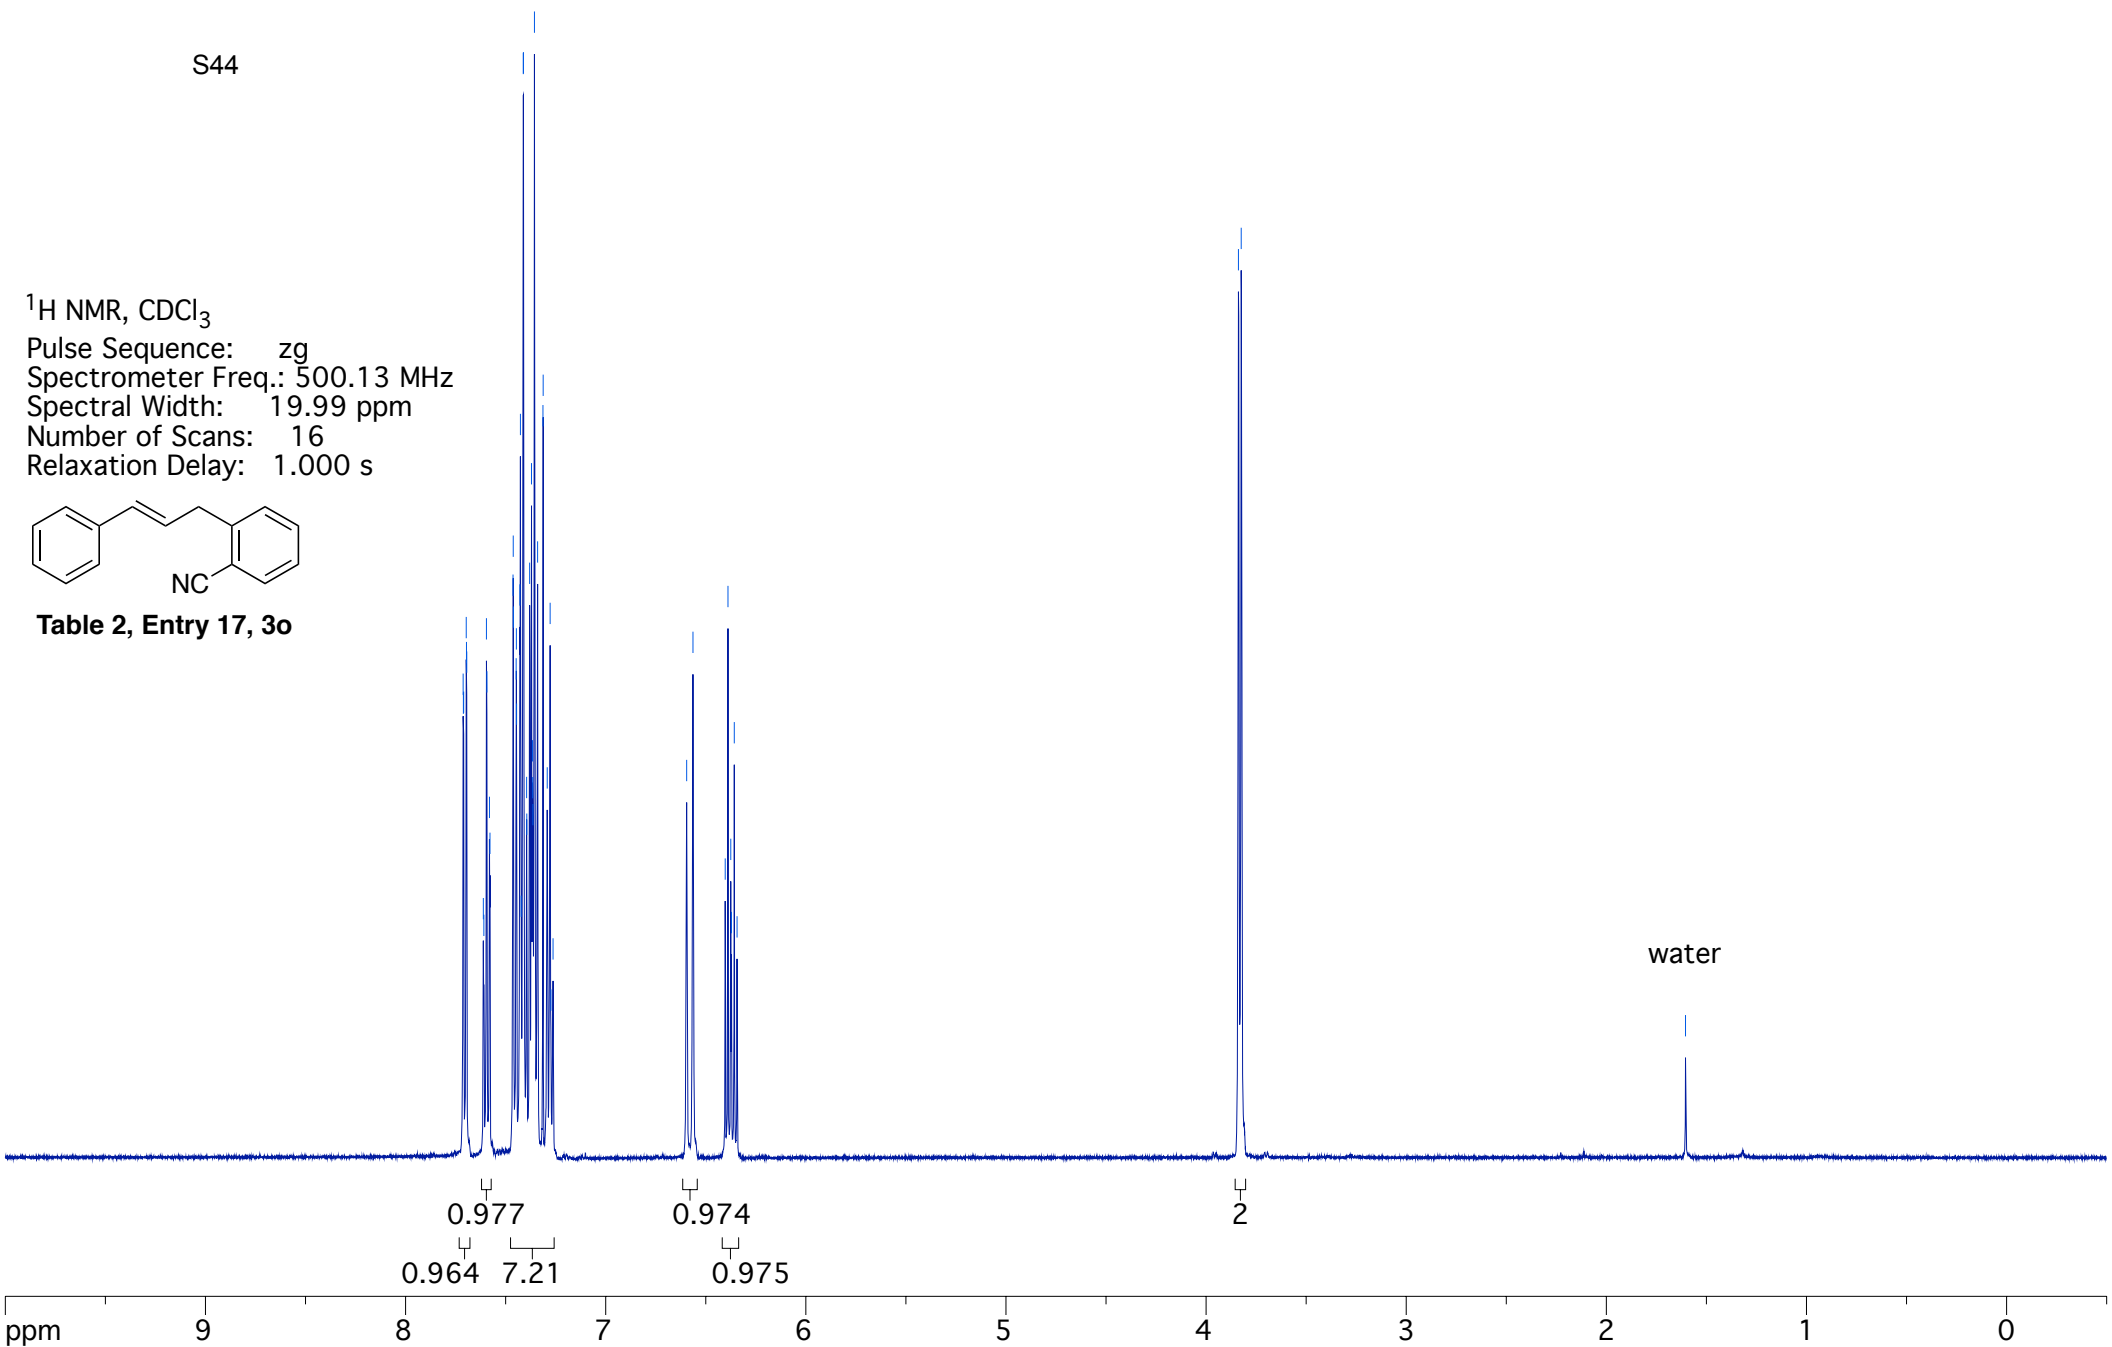

<sup>13</sup>C NMR, CDCl<sub>3</sub>  
Pulse Sequence: zgdc  
Spectrometer Freq.: 100.62 MHz  
Spectral Width: 301.16 ppm  
Number of Scans: 263  
Relaxation Delay: 2.000 s

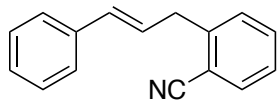

Table 2, Entry 17, 3o

S45

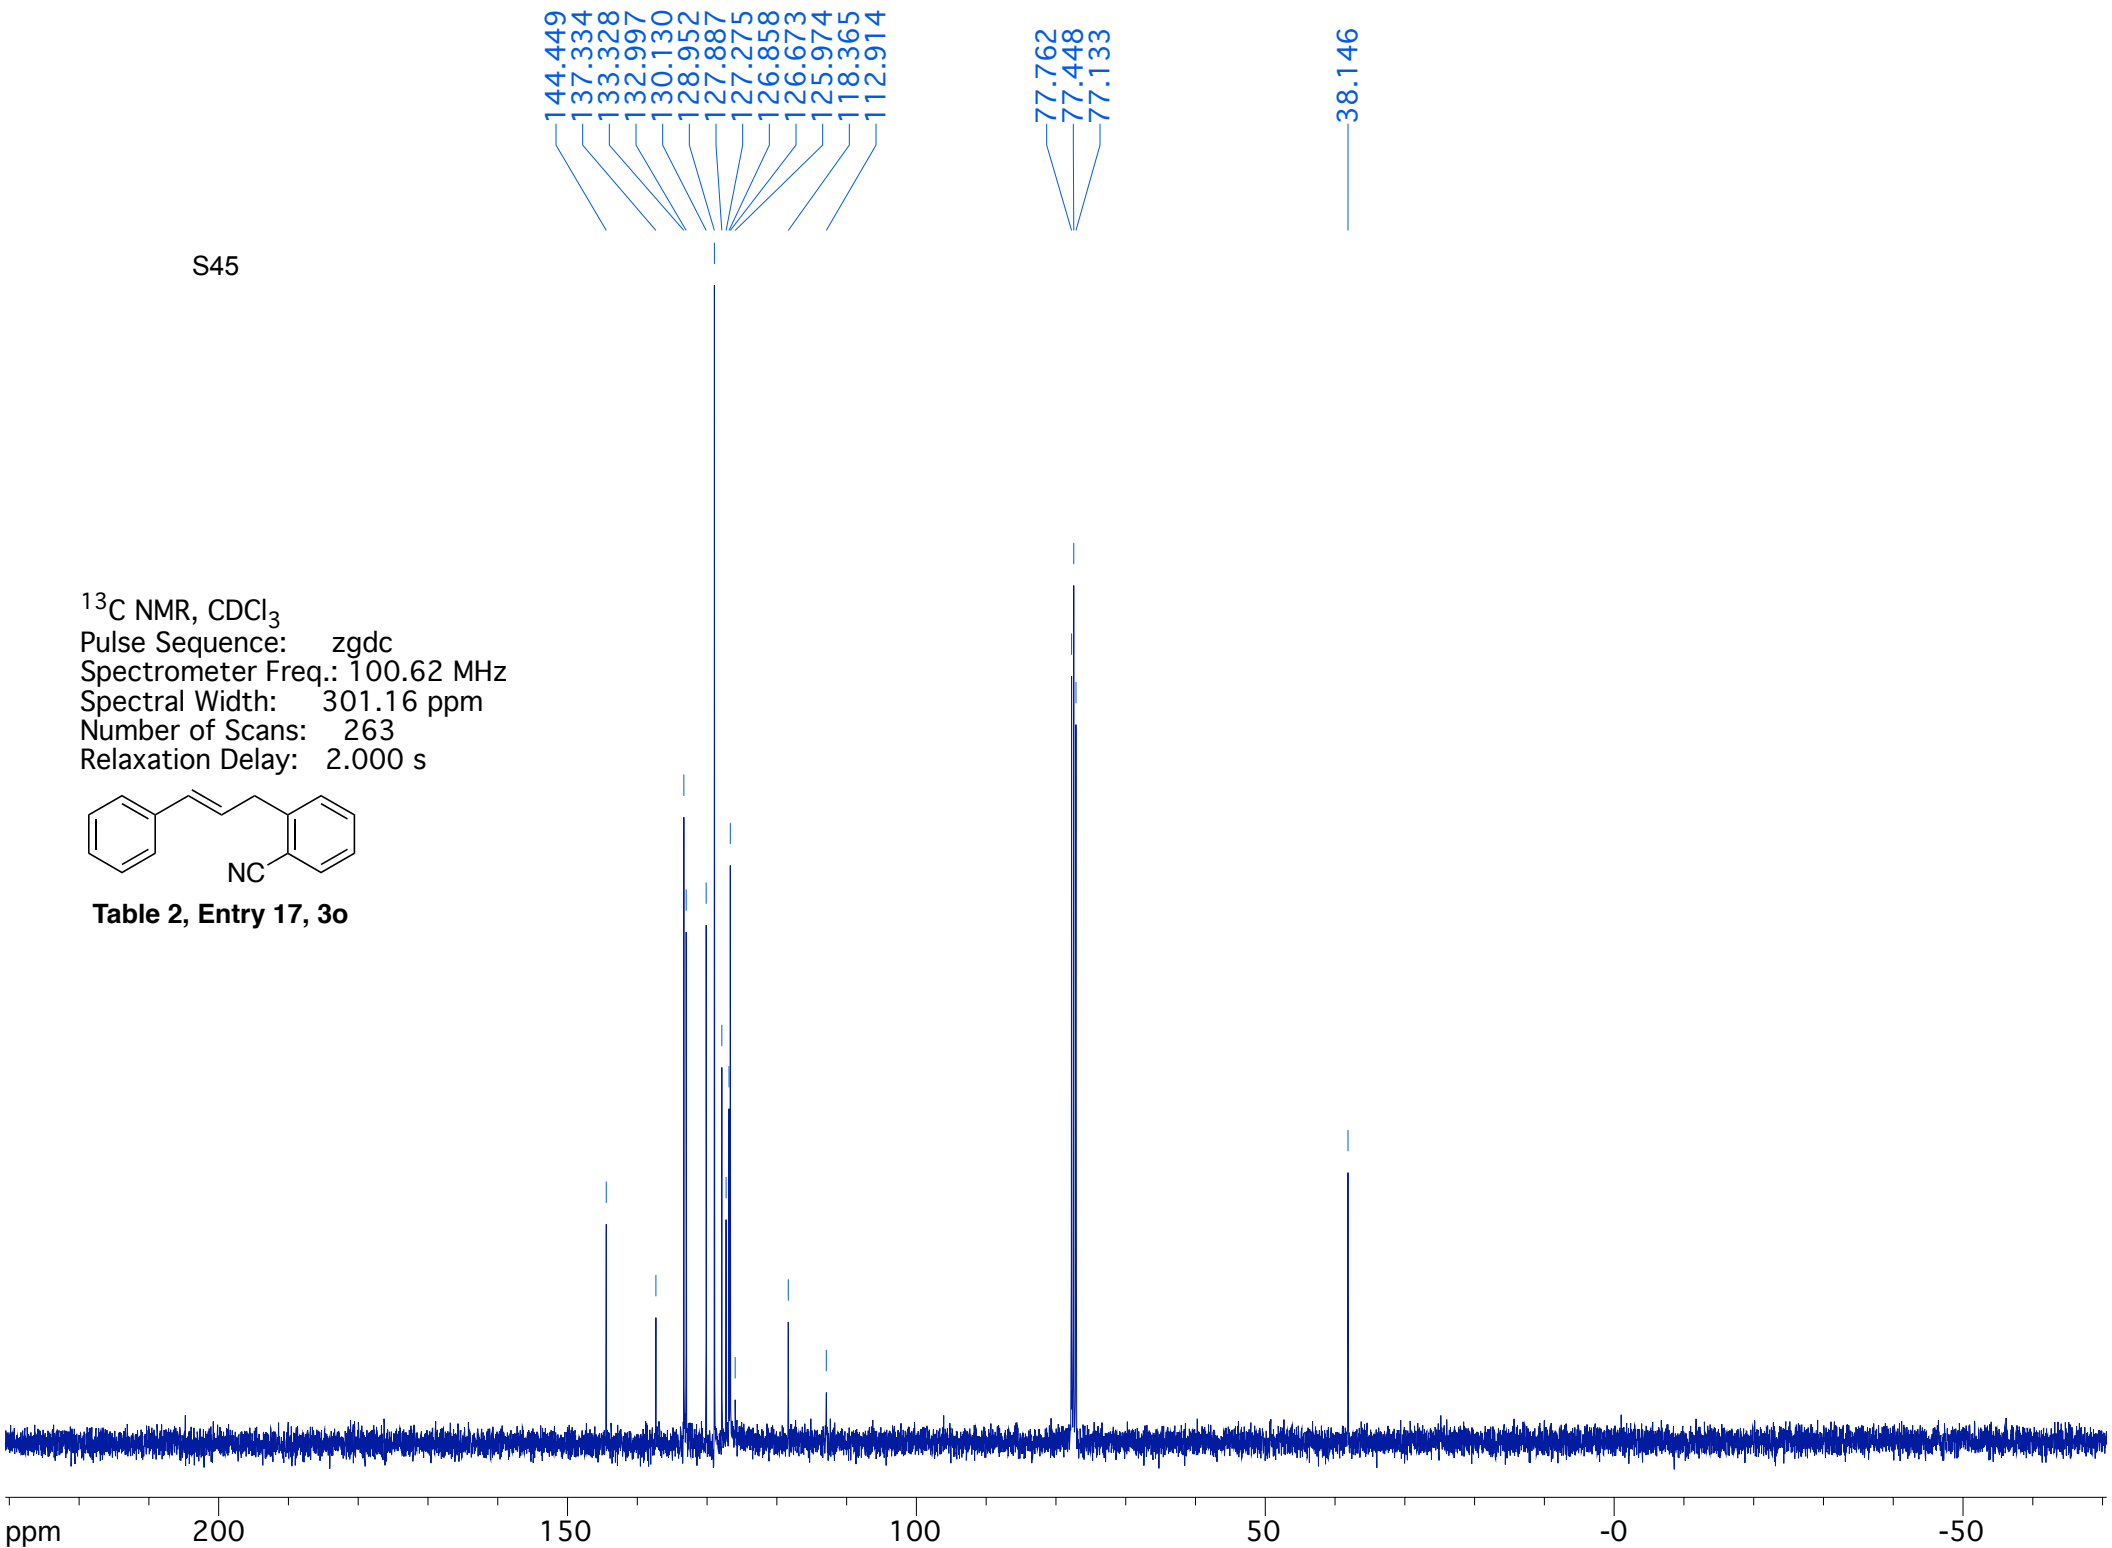



7.405  
7.391  
7.389  
7.338  
7.324  
7.308  
7.290  
7.288  
7.256  
7.245  
7.243  
7.241  
7.233  
7.232  
7.232  
7.230  
7.229  
7.229  
6.971  
6.958  
6.956  
6.942  
6.930  
6.914  
6.499  
6.468  
6.456  
6.445  
6.443  
6.432

3.894  
3.596  
3.584

S46

<sup>1</sup>H NMR, CDCl<sub>3</sub>  
Pulse Sequence: zg  
Spectrometer Freq.: 500.13 MHz  
Spectral Width: 19.99 ppm  
Number of Scans: 16  
Relaxation Delay: 1.000 s

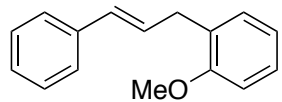

Table 2, Entry 18, 3p

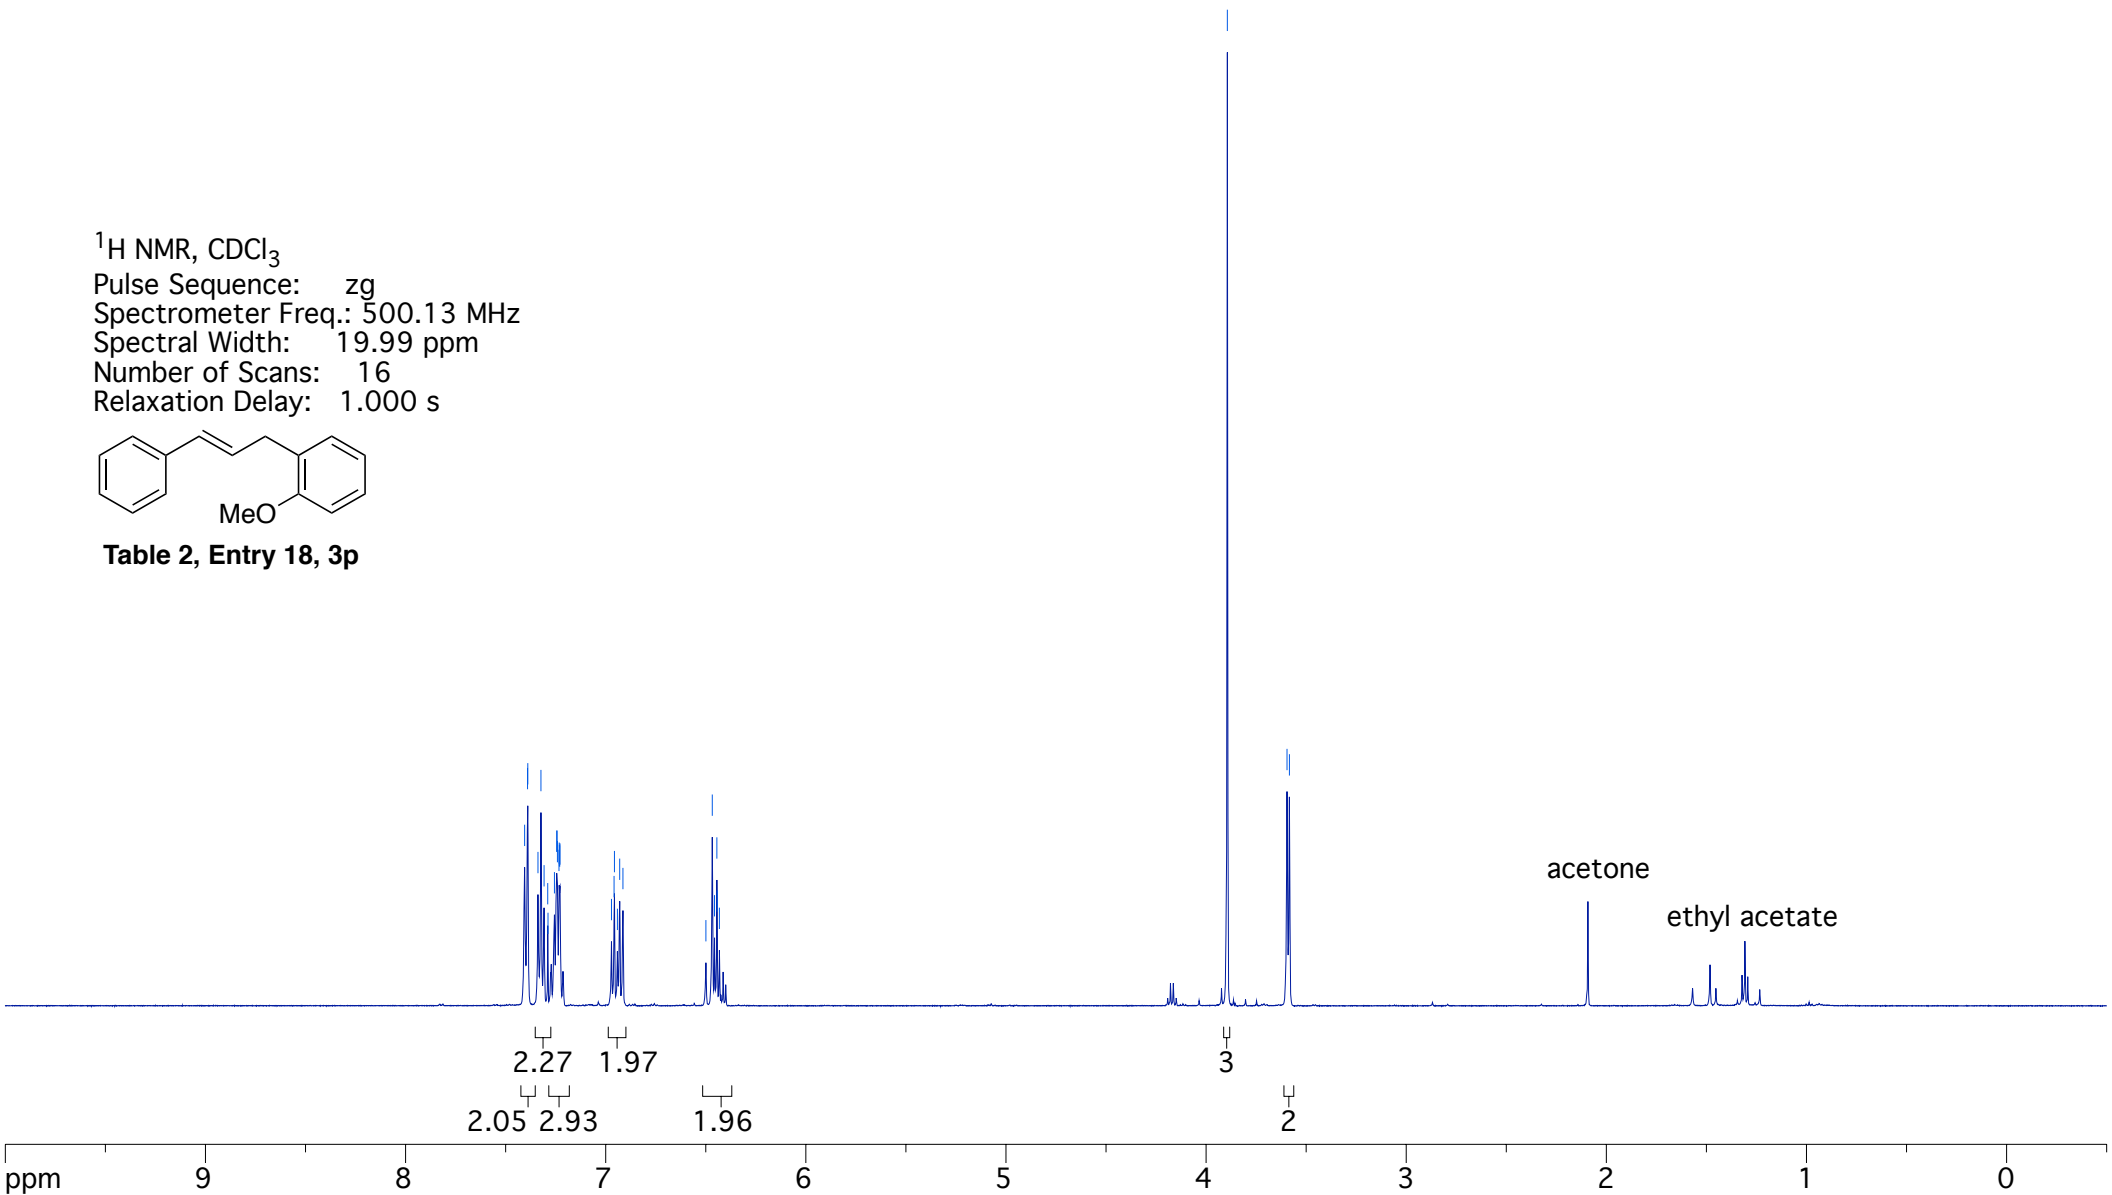

S47

<sup>13</sup>C NMR, CDCl<sub>3</sub>  
Pulse Sequence: zgdc  
Spectrometer Freq.: 125.77 MHz  
Spectral Width: 301.18 ppm  
Number of Scans: 236  
Relaxation Delay: 2.000 s

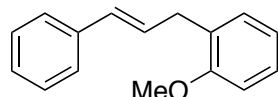

Table 2, Entry 18, 3p

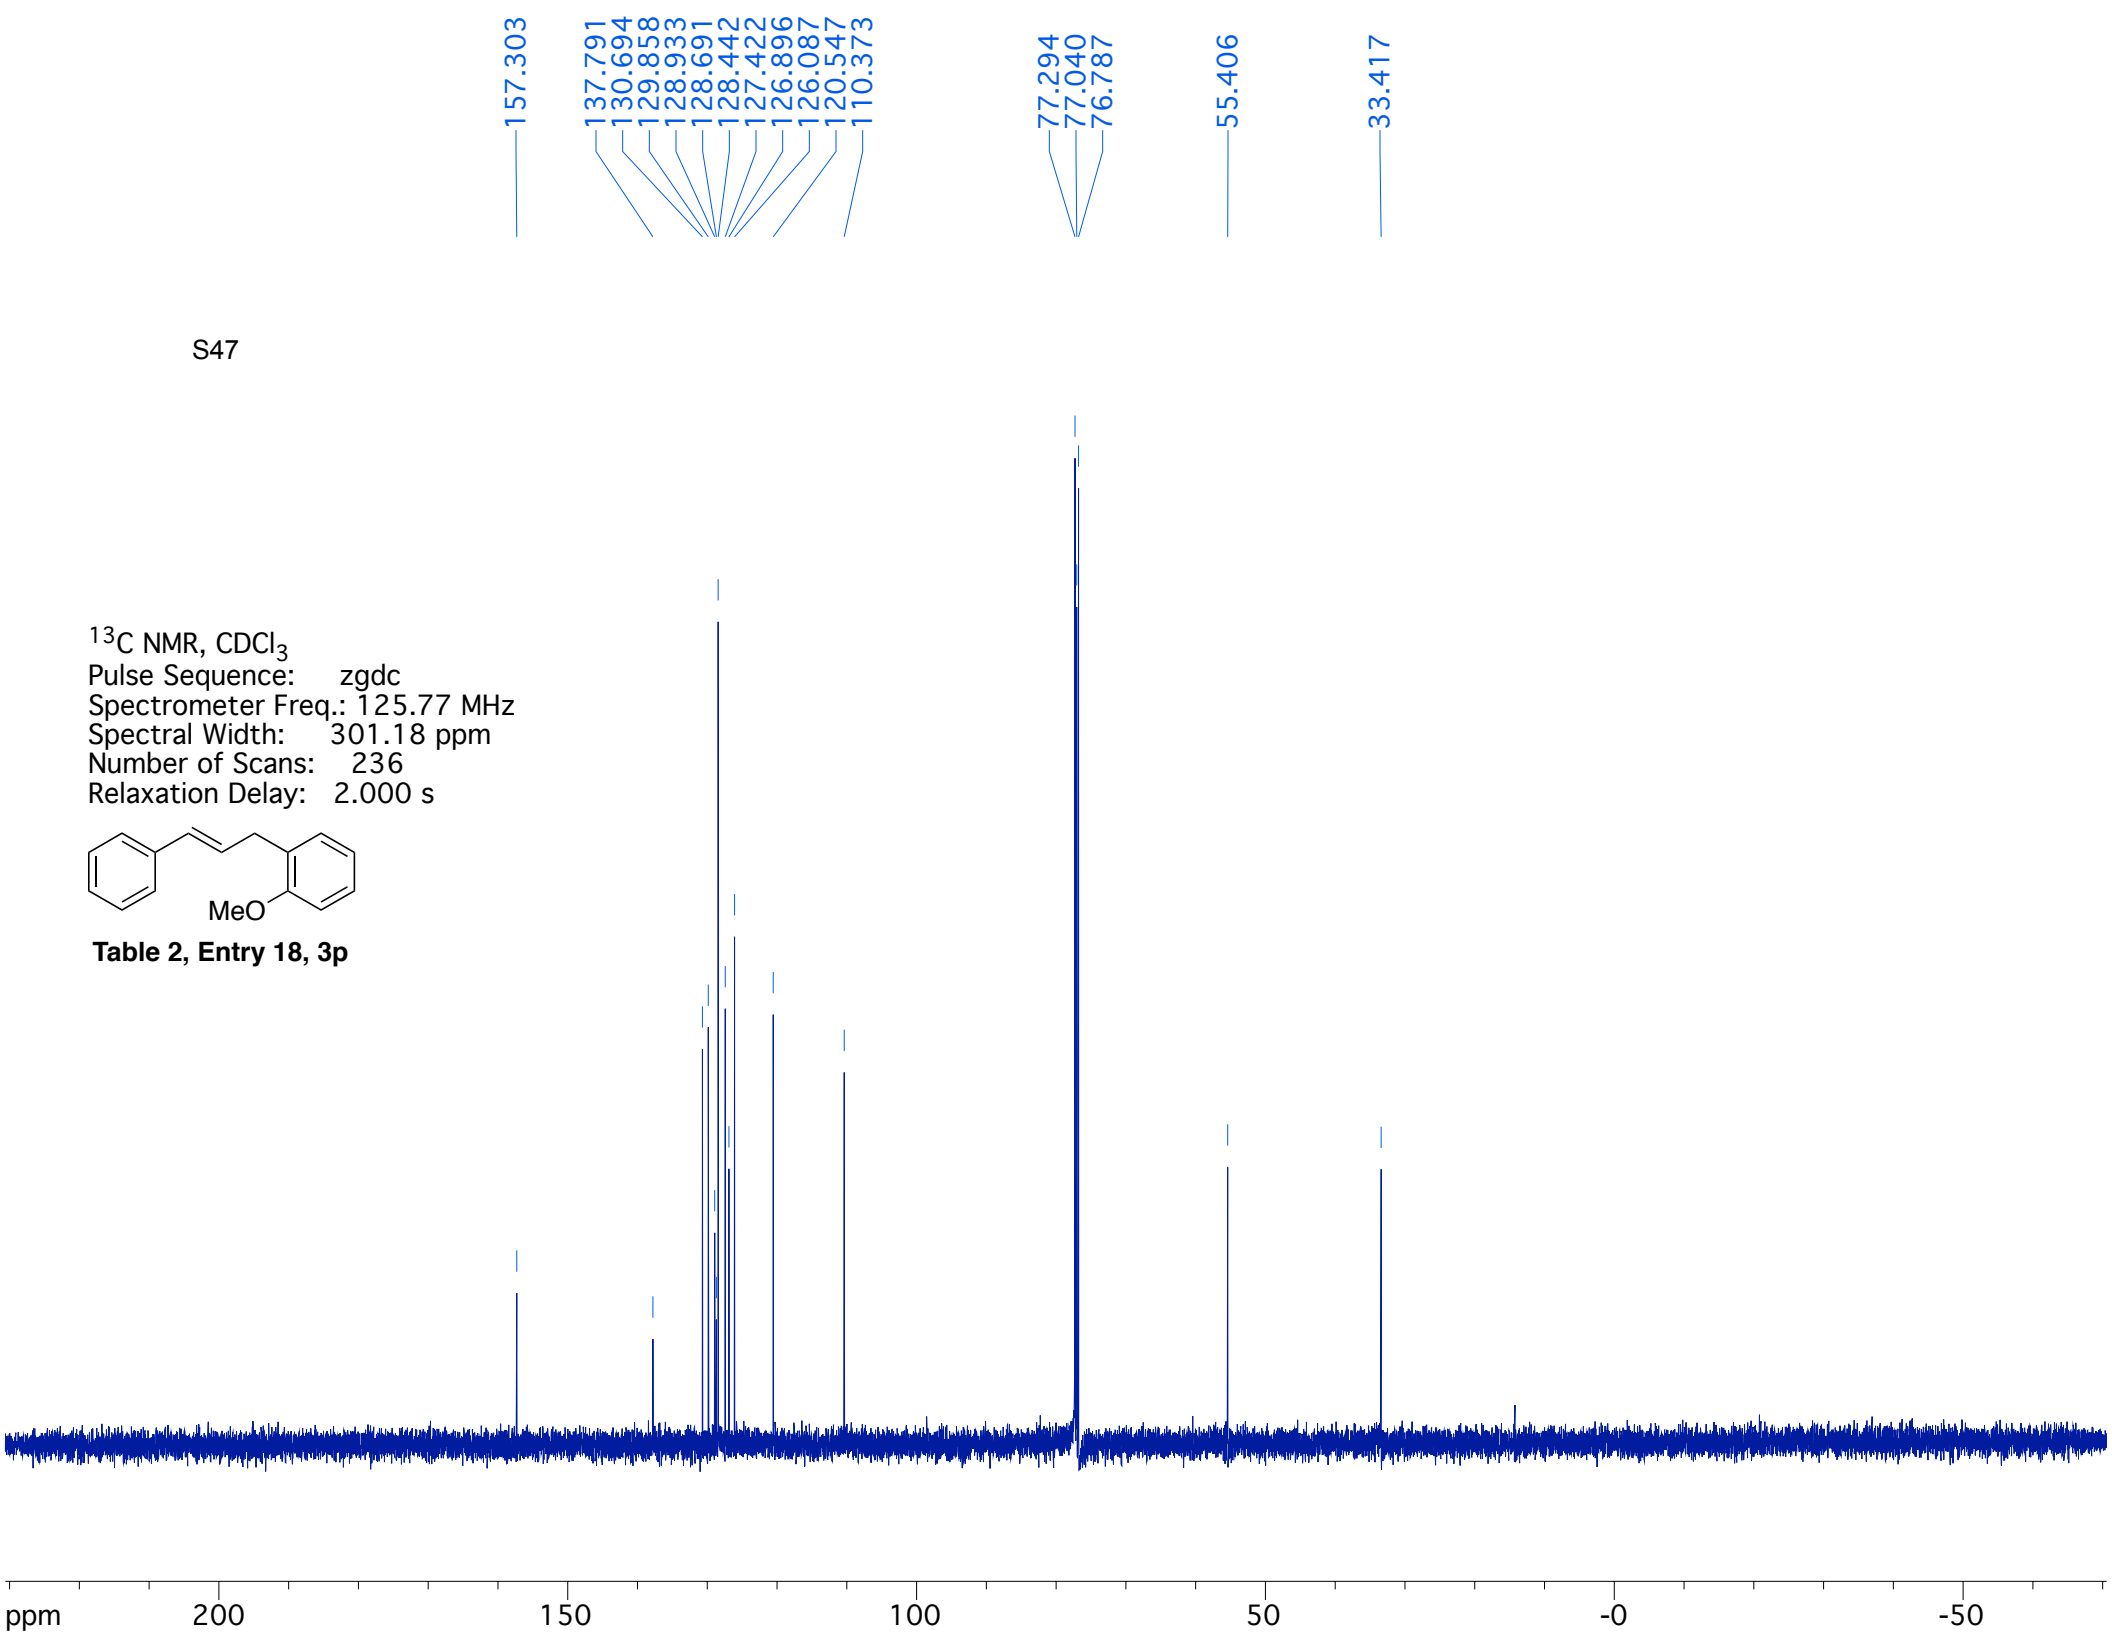

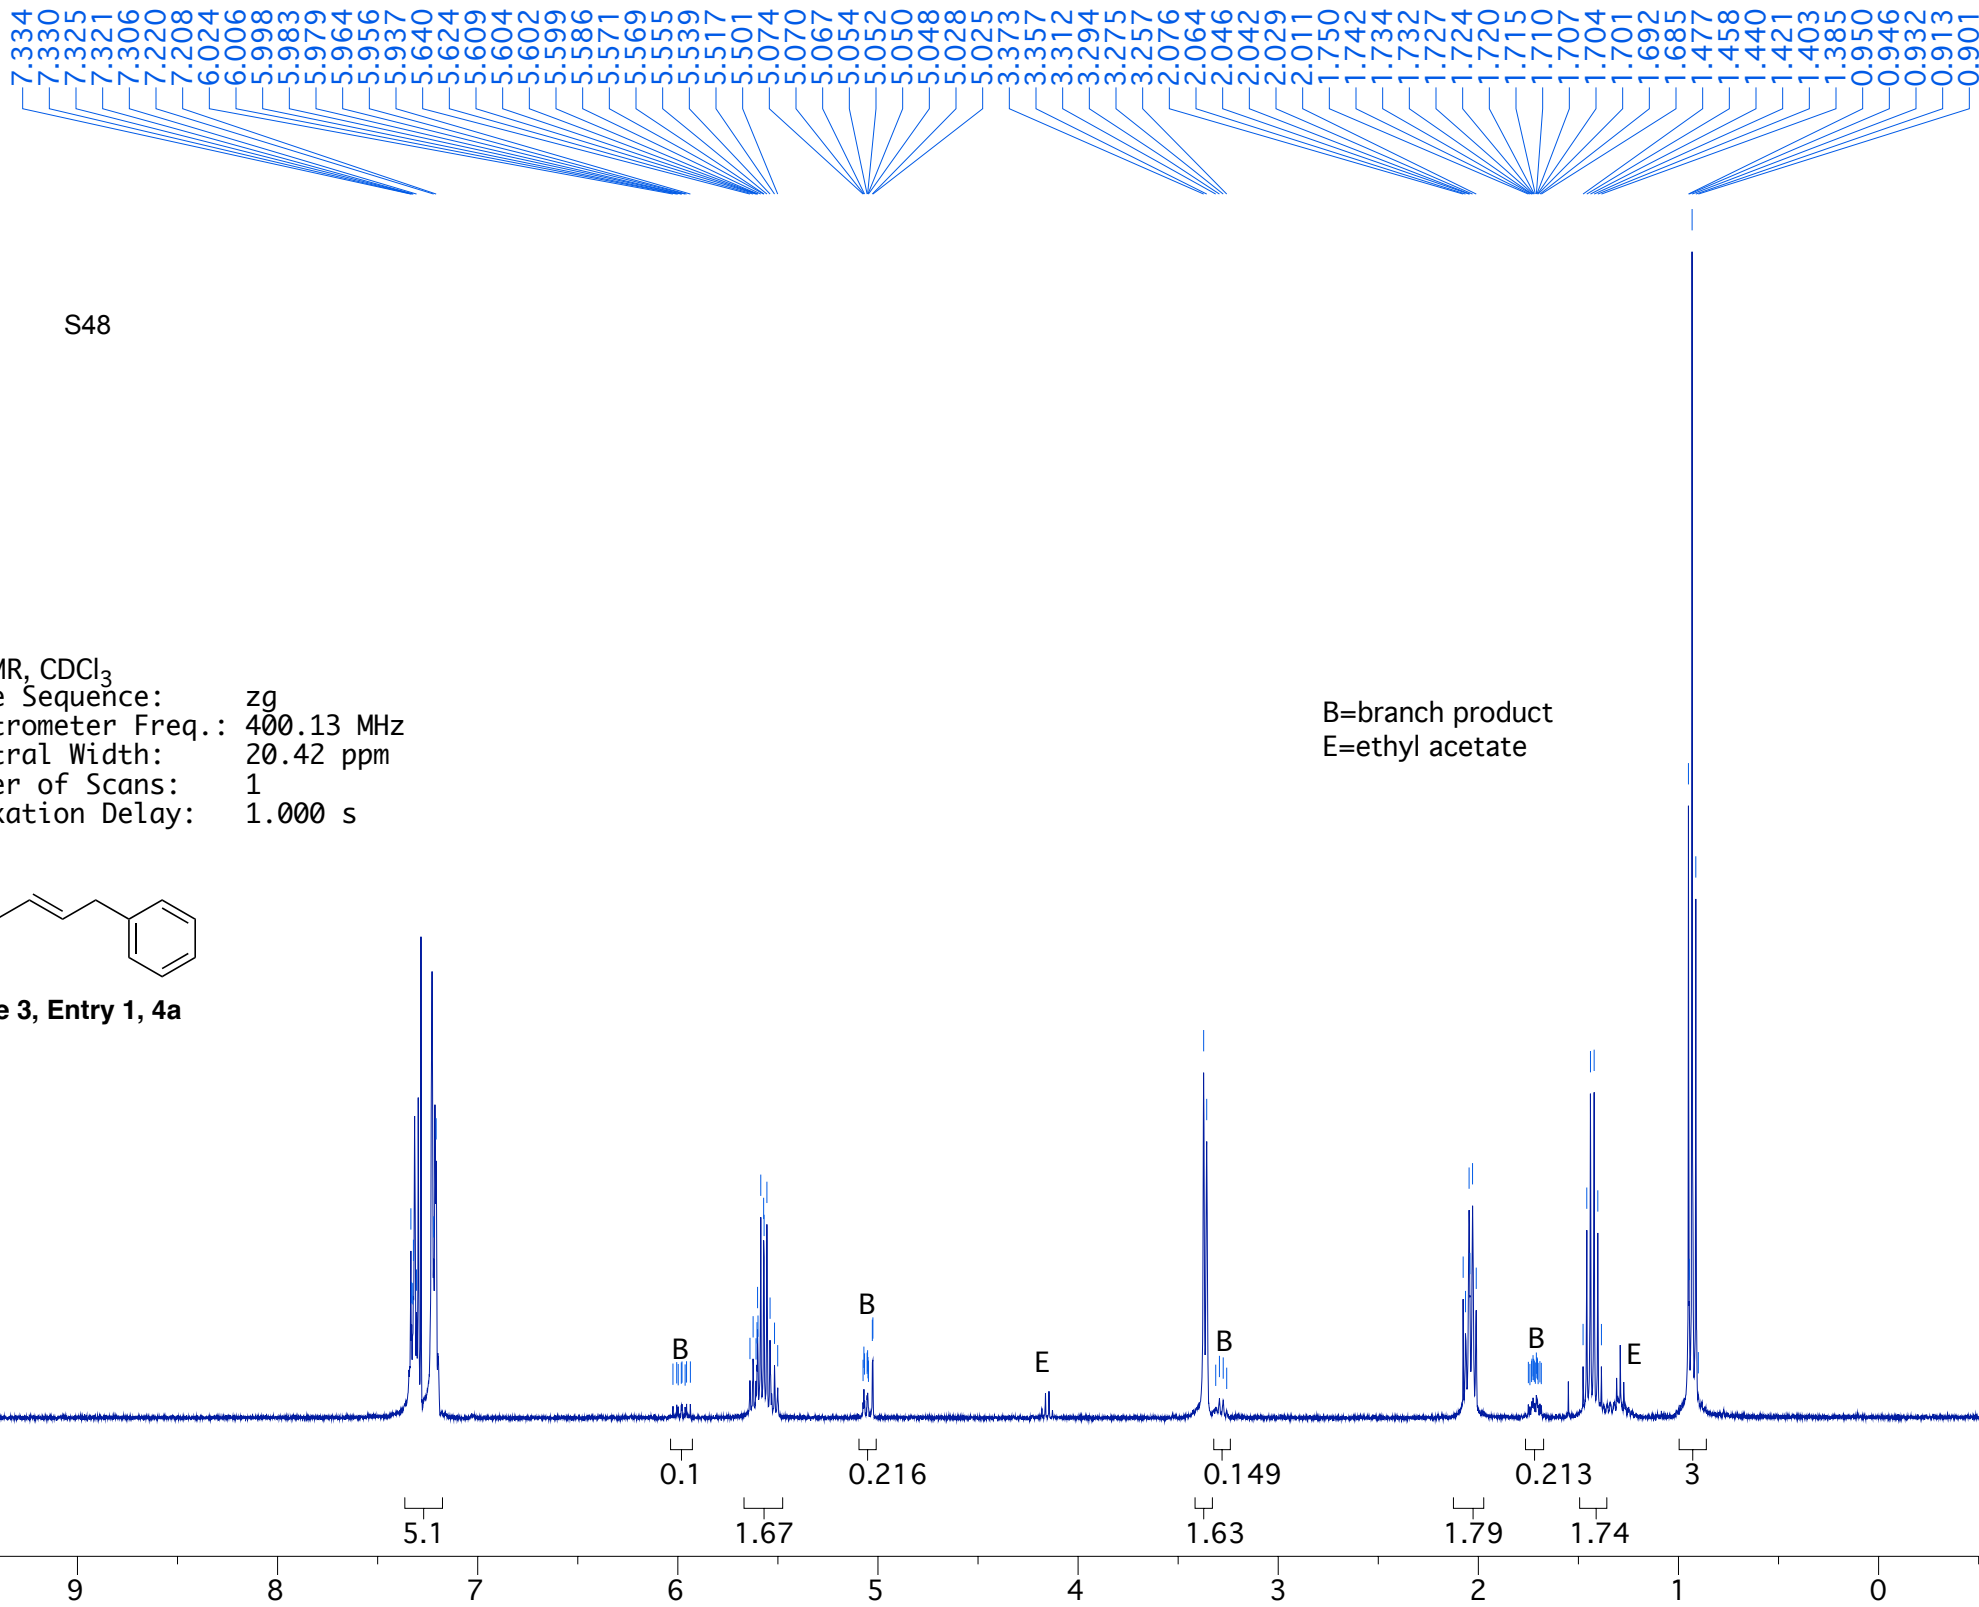

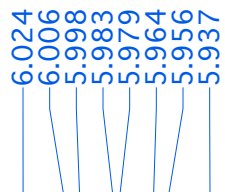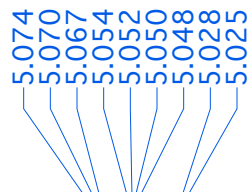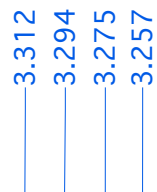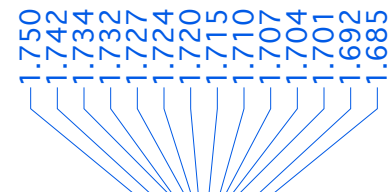

S49

<sup>1</sup>H NMR, CDCl<sub>3</sub> - Expanded from Table 3, Entry 1

Pulse Sequence: zg  
Spectrometer Freq.: 400.13 MHz  
Spectral Width: 20.42 ppm  
Number of Scans: 1  
Relaxation Delay: 1.000 s

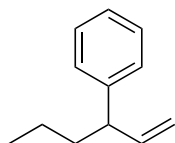

**Branched Product**

B=branch product

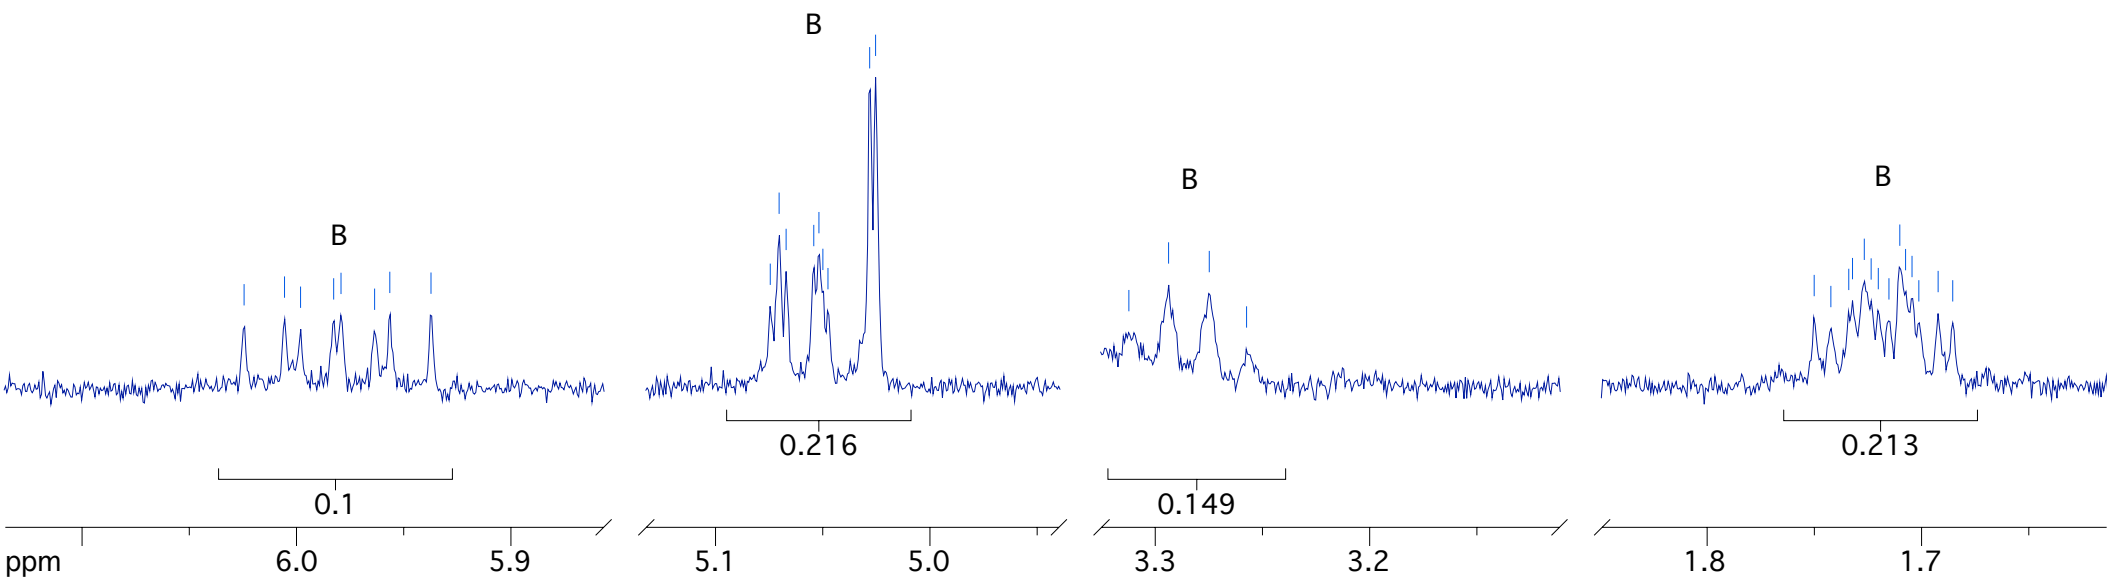

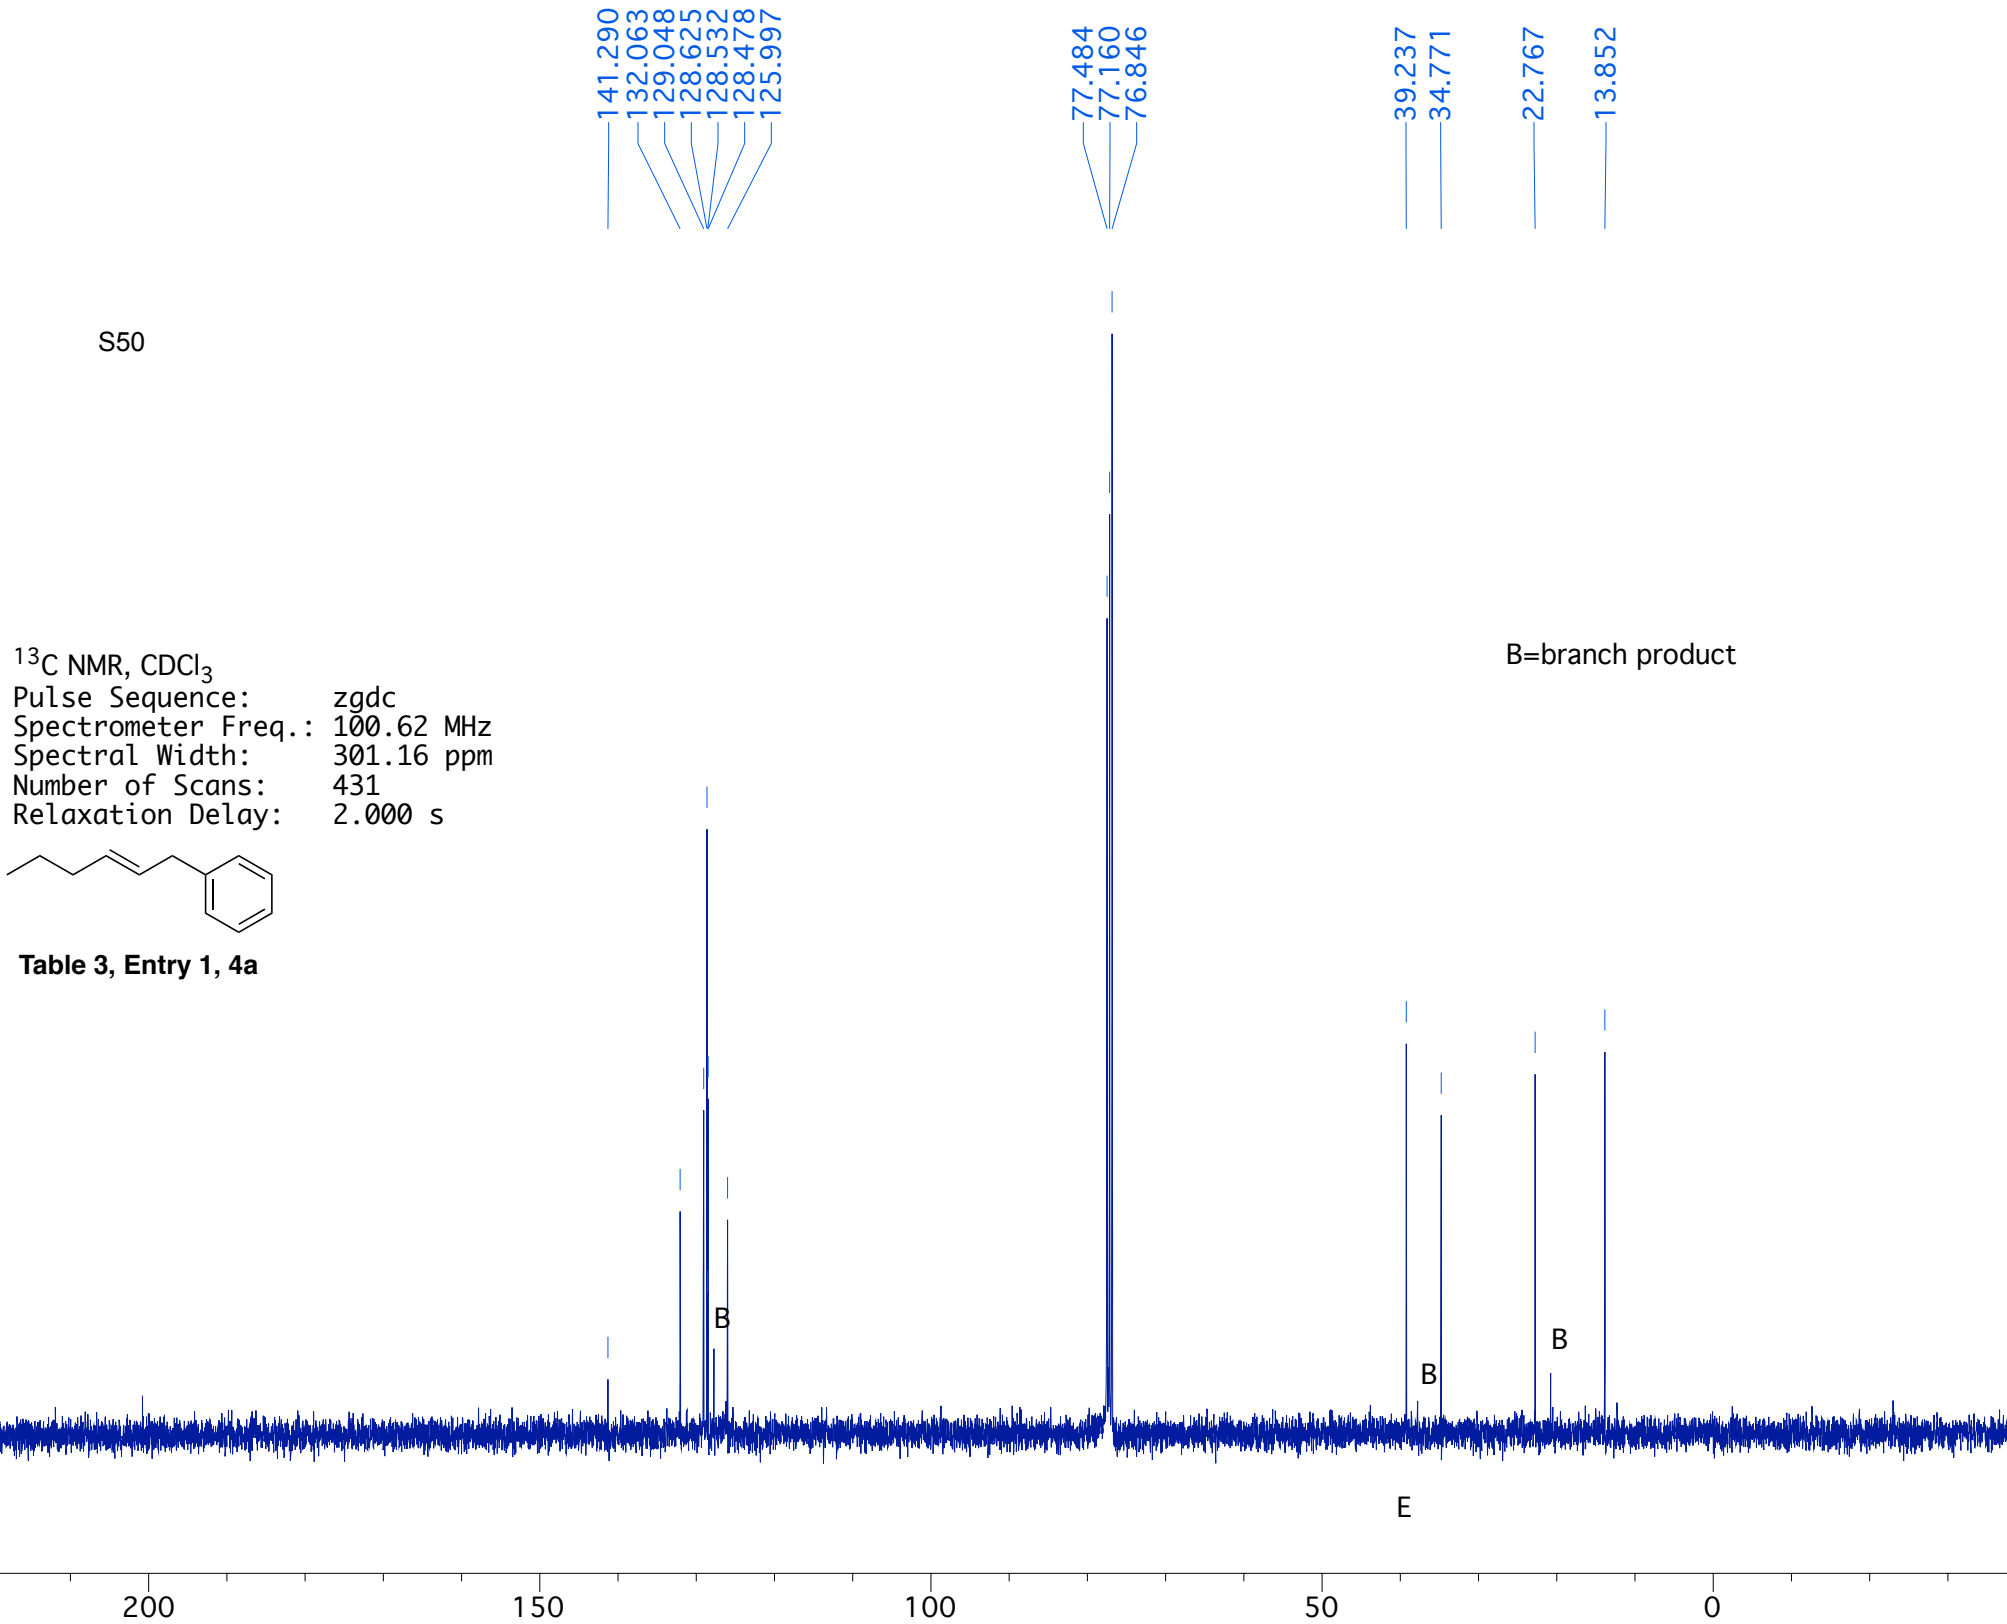

7.412  
7.408  
7.404  
7.391  
7.388  
7.383  
7.372  
7.368  
7.353  
7.351  
7.344  
7.340  
7.335  
7.331  
7.327  
7.315  
7.311  
7.300  
7.297  
7.291  
7.282  
7.279  
7.259  
7.255  
7.245  
7.241  
6.522  
6.482  
6.437  
6.420  
6.404  
6.381  
6.364

3.603  
3.586

S51

$^1\text{H}$  NMR,  $\text{CDCl}_3$   
Pulse Sequence: zg  
Spectrometer Freq.: 400.13 MHz  
Spectral Width: 20.42 ppm  
Number of Scans: 1  
Relaxation Delay: 1.000 s

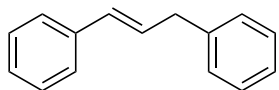

Table 3, Entry 2, 3a

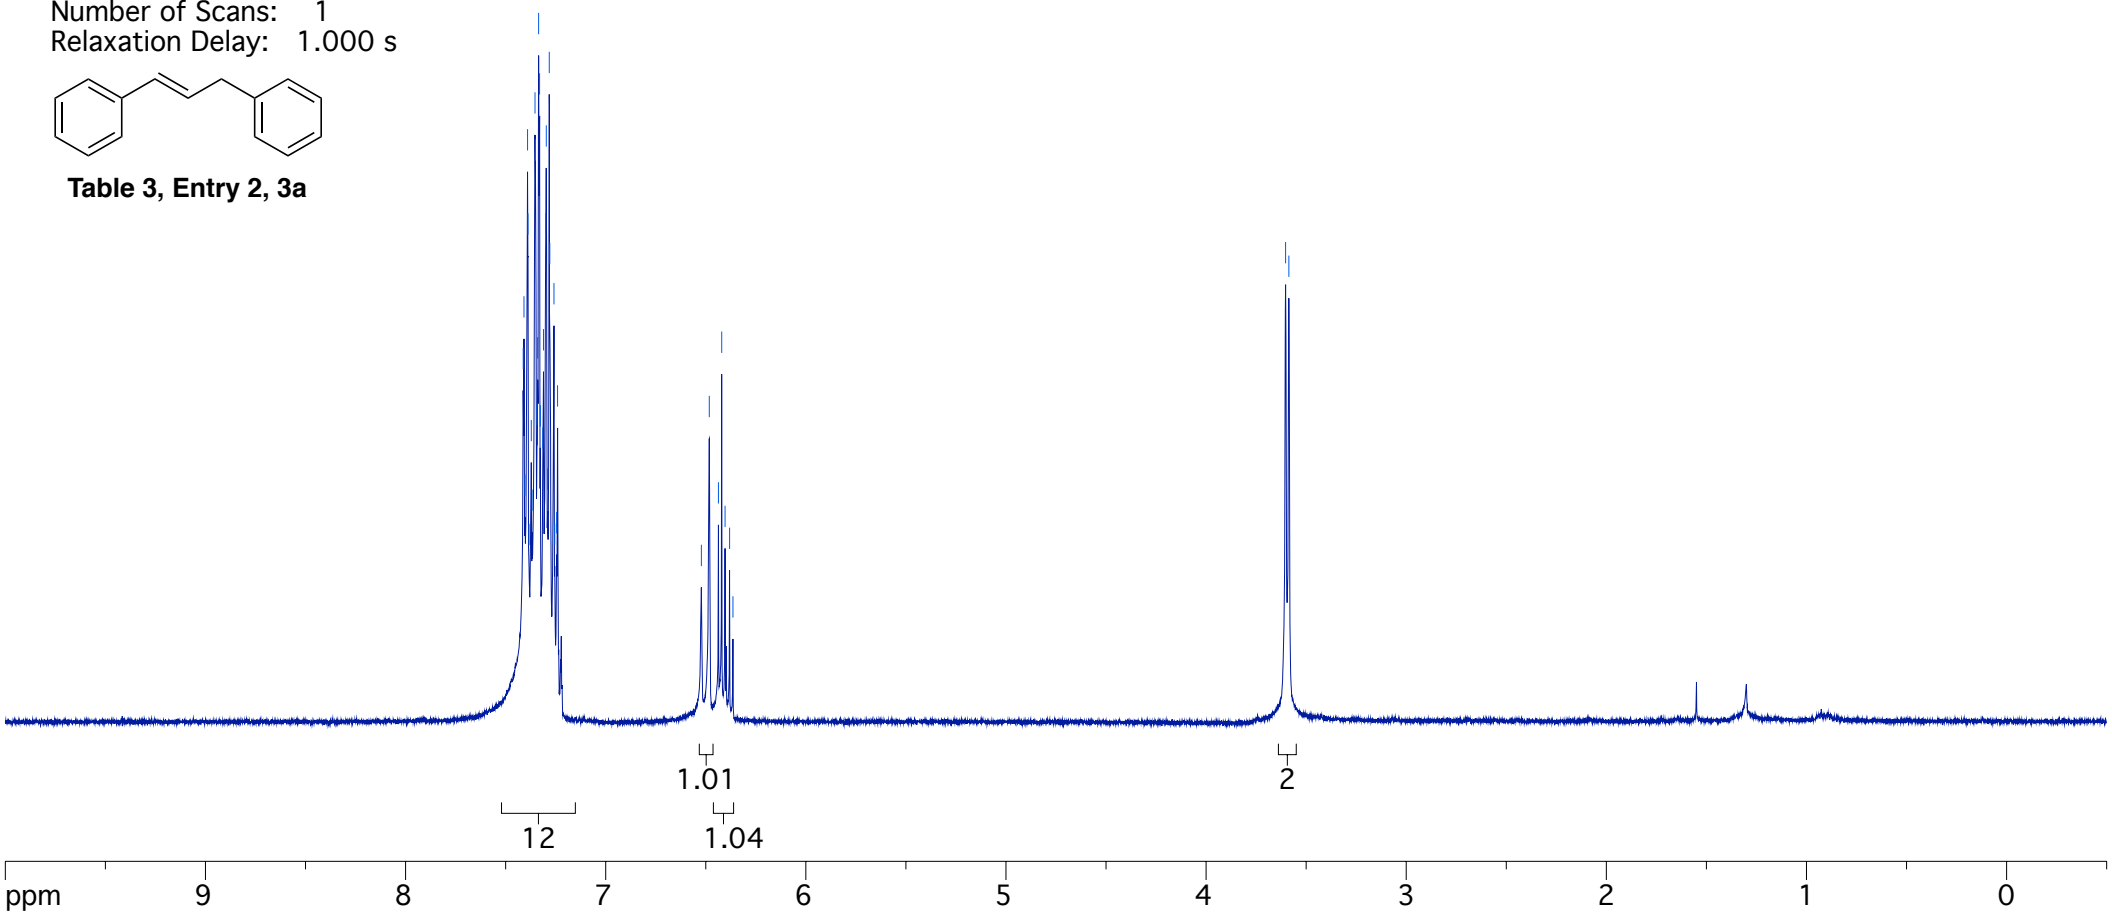

S52

140.571  
137.885  
131.472  
129.634  
129.082  
128.899  
127.502  
126.582  
126.527

77.744  
77.430  
77.115

39.767

<sup>13</sup>C NMR, CDCl<sub>3</sub>  
Pulse Sequence: zgdc  
Spectrometer Freq.: 100.62 MHz  
Spectral Width: 301.16 ppm  
Number of Scans: 202  
Relaxation Delay: 2.000 s

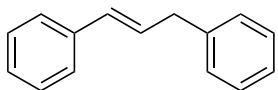

Table 3, Entry 2, 3a

ppm 200 150 100 50 -0 -50

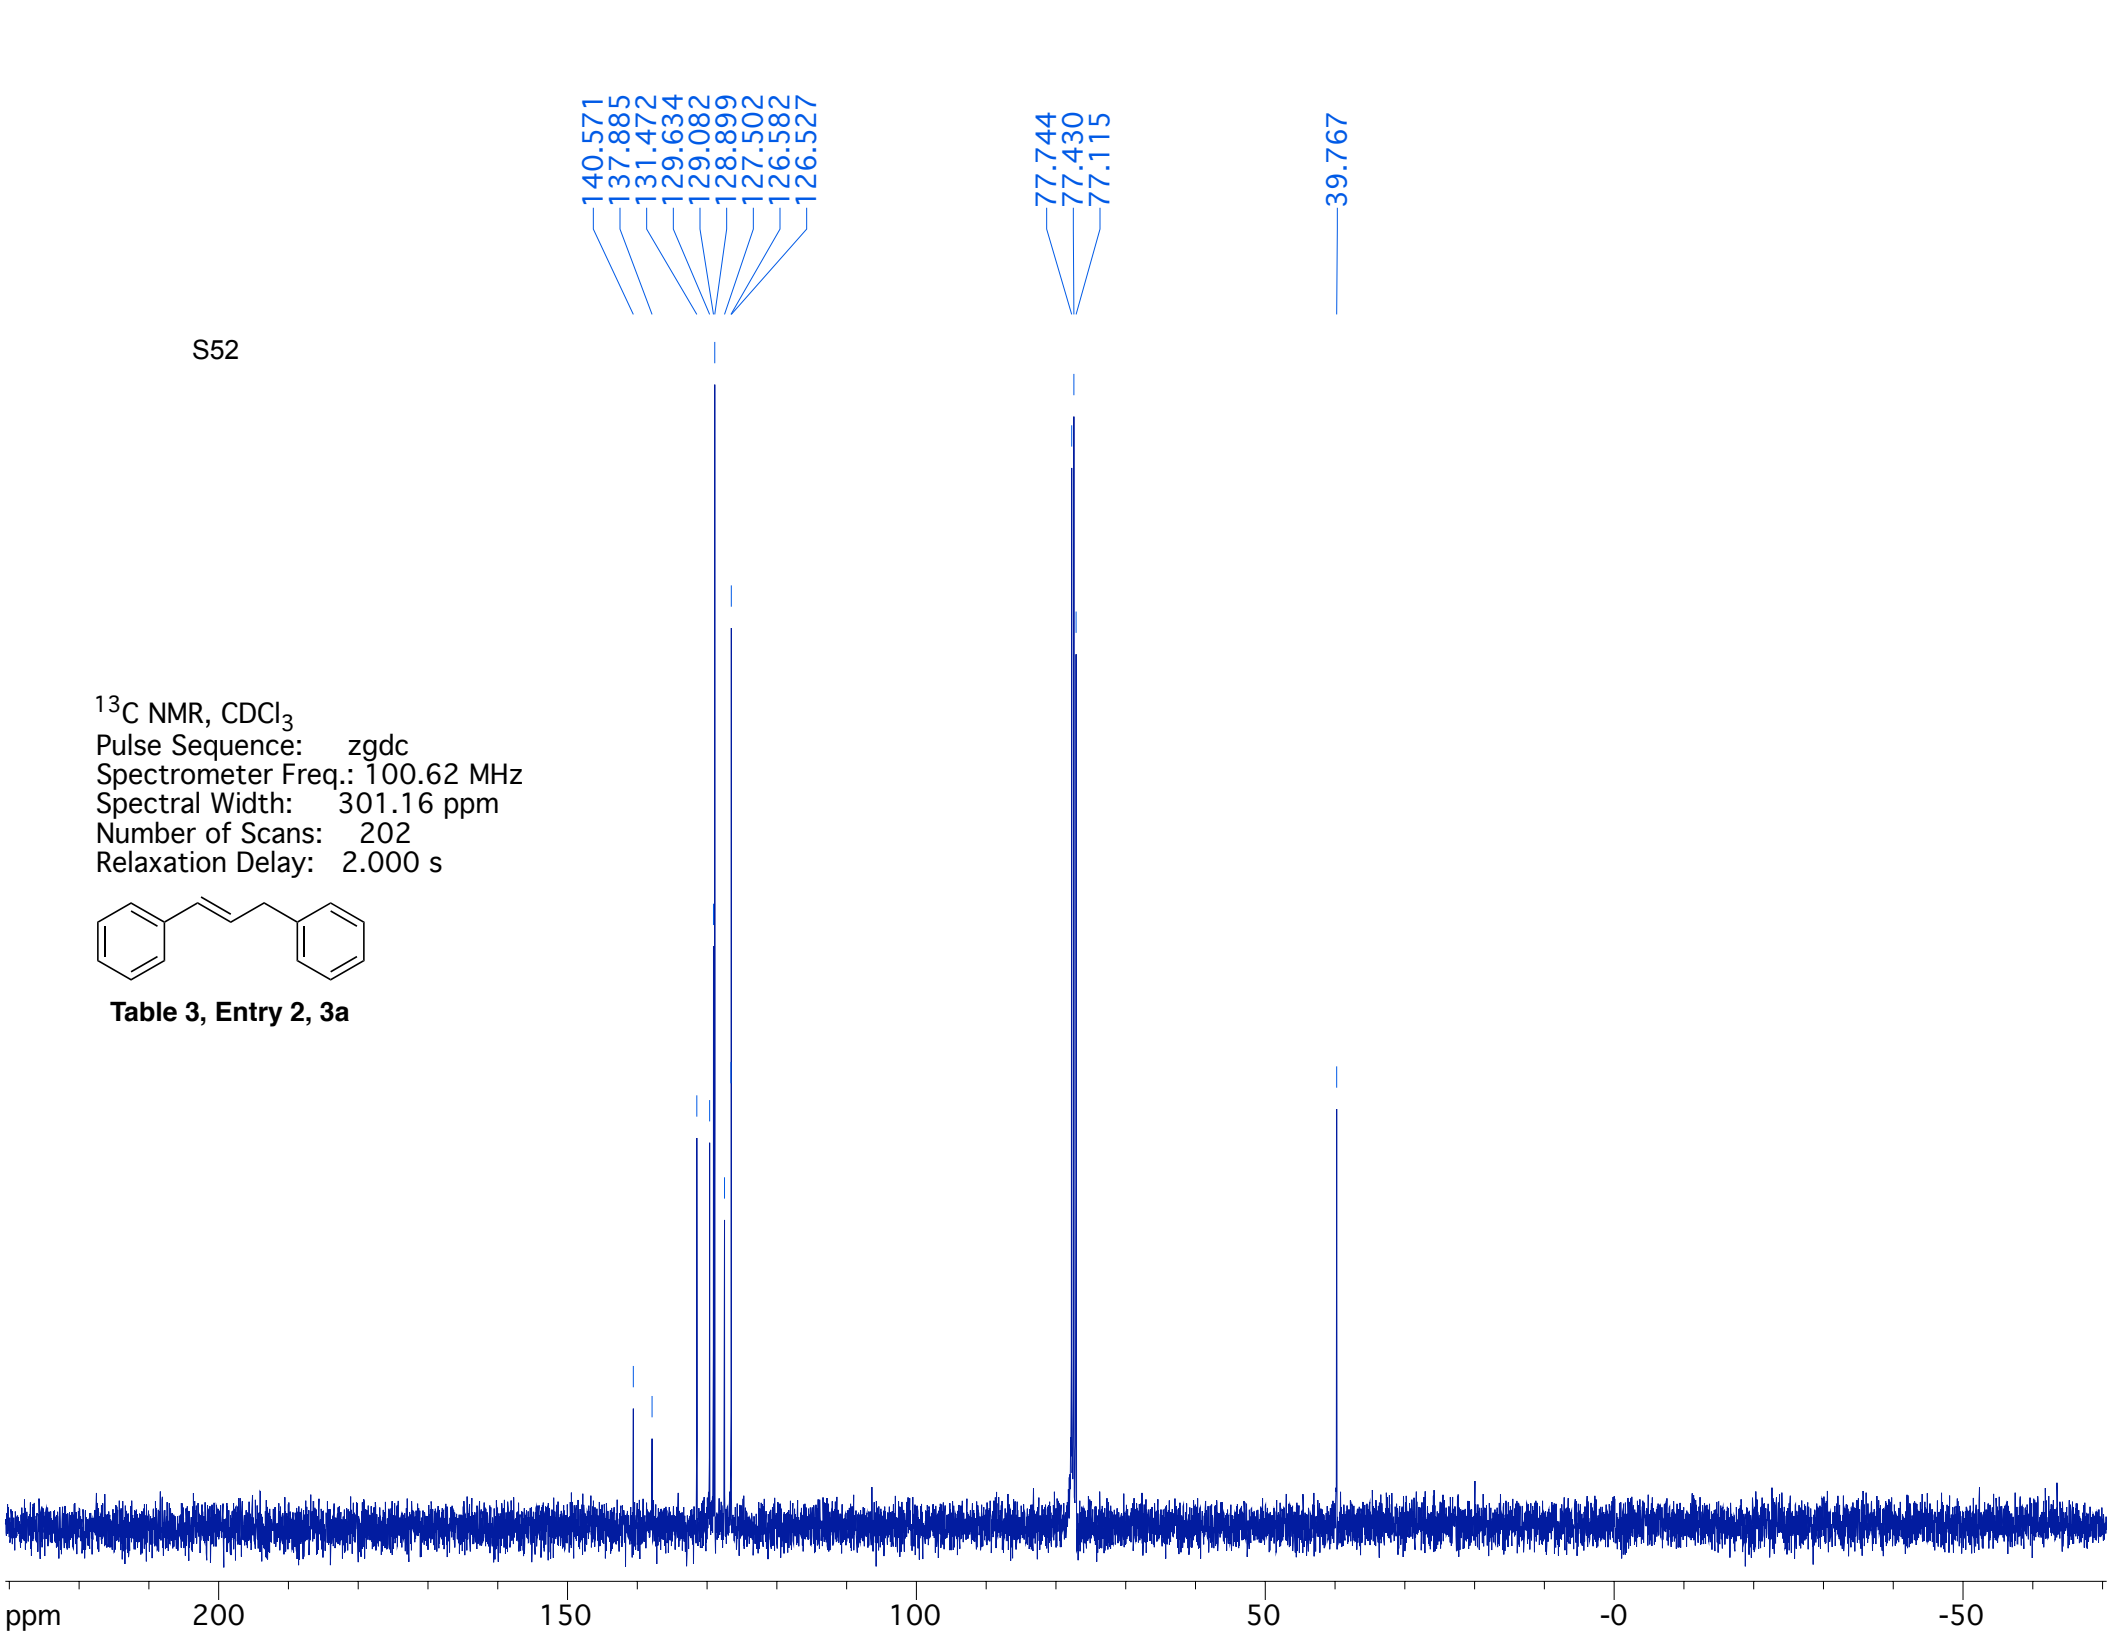

7.413  
7.410  
7.392  
7.390  
7.376  
7.373  
7.355  
7.352  
7.350  
7.337  
7.332  
7.312  
7.302  
7.298  
7.283  
7.279  
7.260  
7.224  
7.220  
6.523  
6.484  
6.438  
6.422  
6.405  
6.399  
6.383  
6.366

3.604  
3.587

S53

$^1\text{H}$  NMR,  $\text{CDCl}_3$   
Pulse Sequence: zg  
Spectrometer Freq.: 400.13 MHz  
Spectral Width: 20.42 ppm  
Number of Scans: 1  
Relaxation Delay: 1.000 s

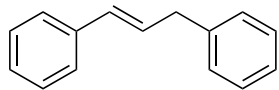

Table 3, Entry 3, 3a

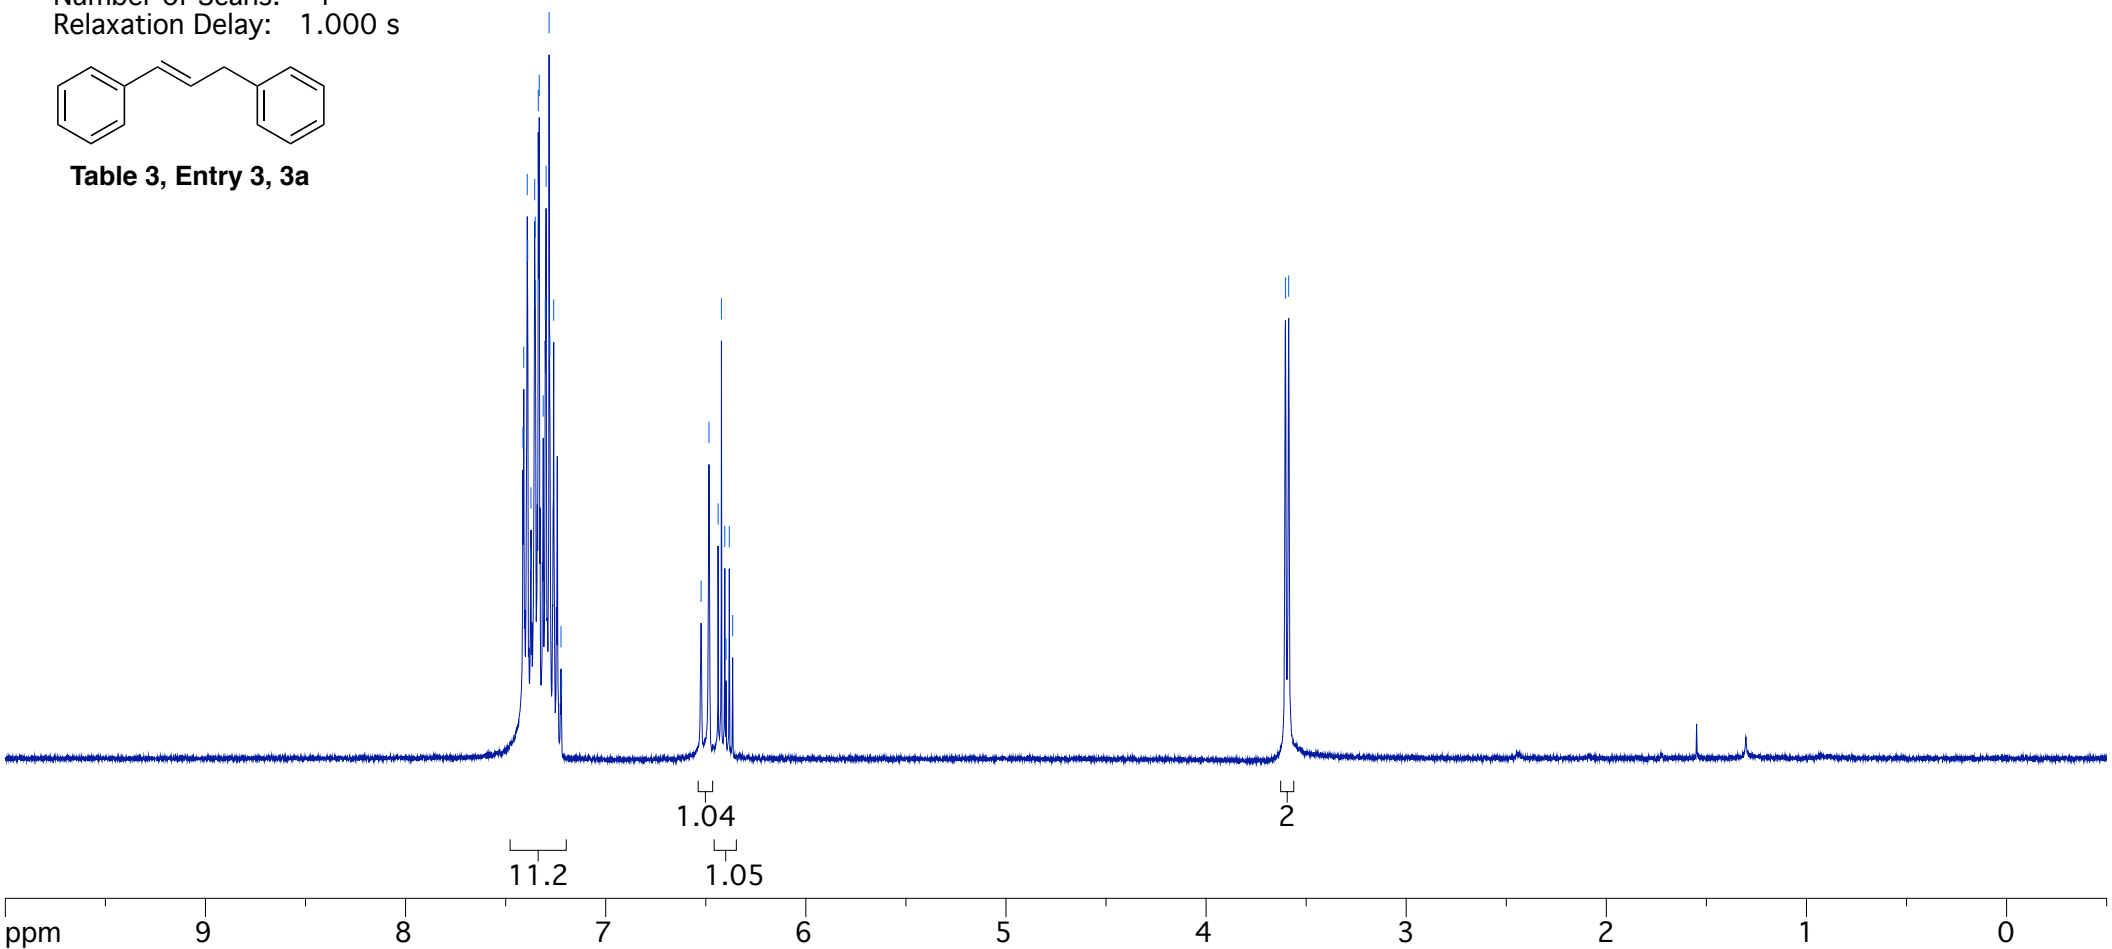



S54

$^{13}\text{C}$  NMR,  $\text{CDCl}_3$   
Pulse Sequence: zgdc  
Spectrometer Freq.: 100.62 MHz  
Spectral Width: 301.16 ppm  
Number of Scans: 1297  
Relaxation Delay: 2.000 s

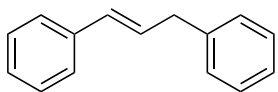

Table 3, Entry 3, 3a

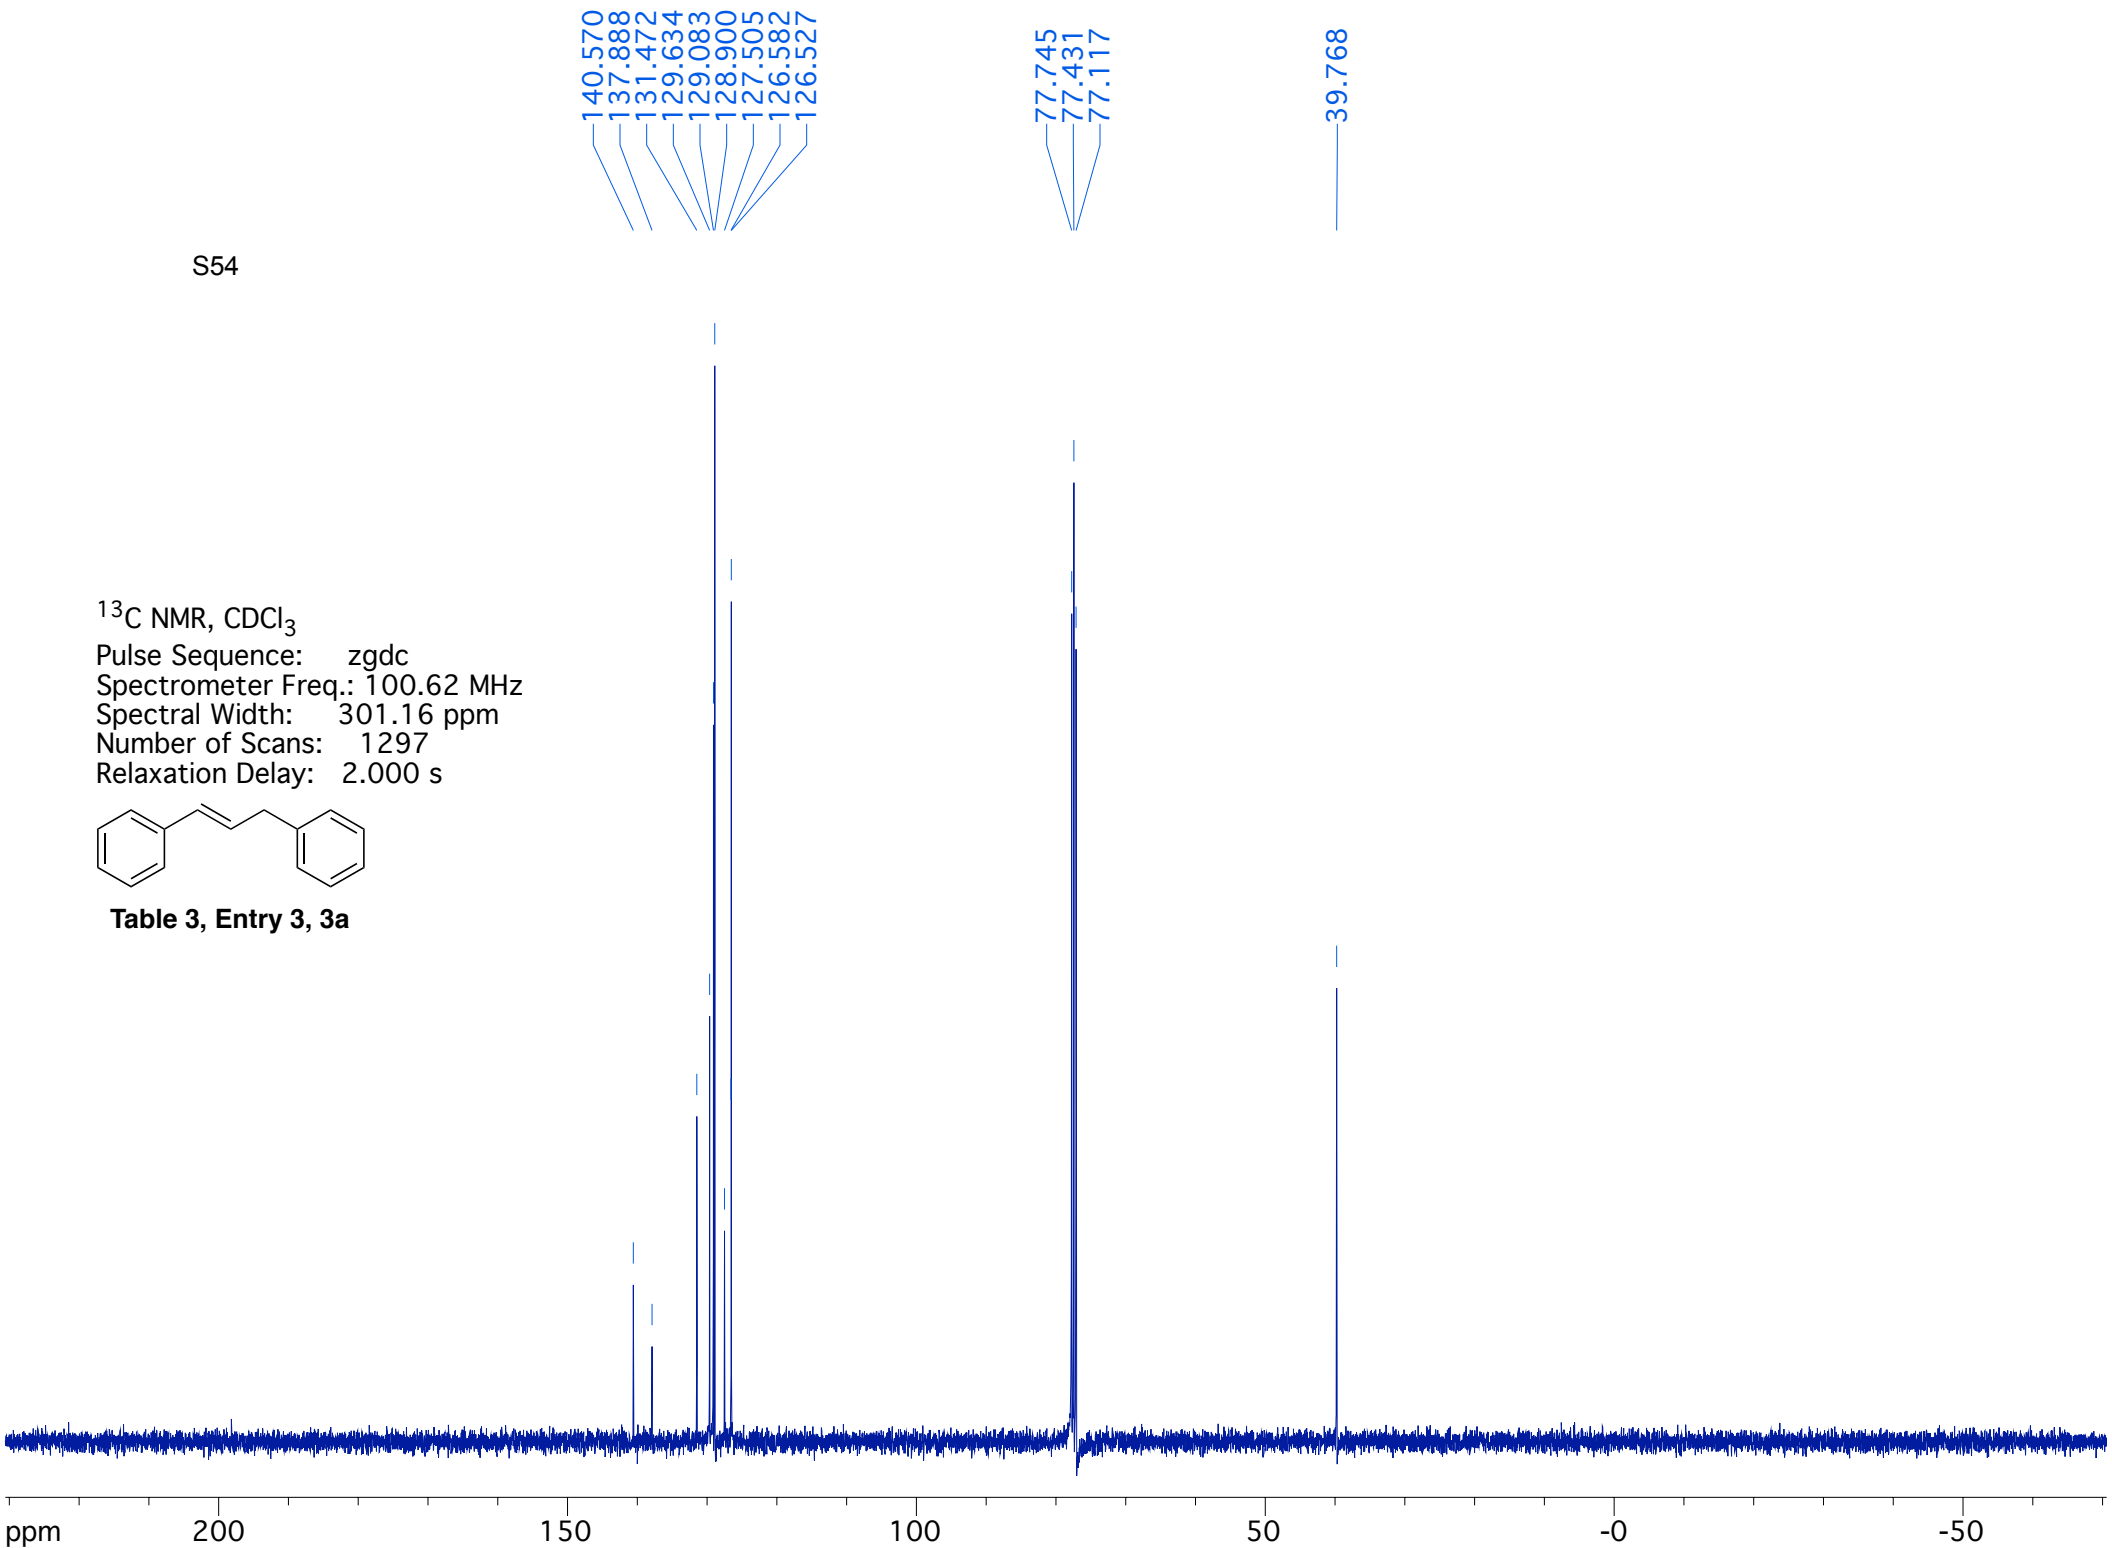

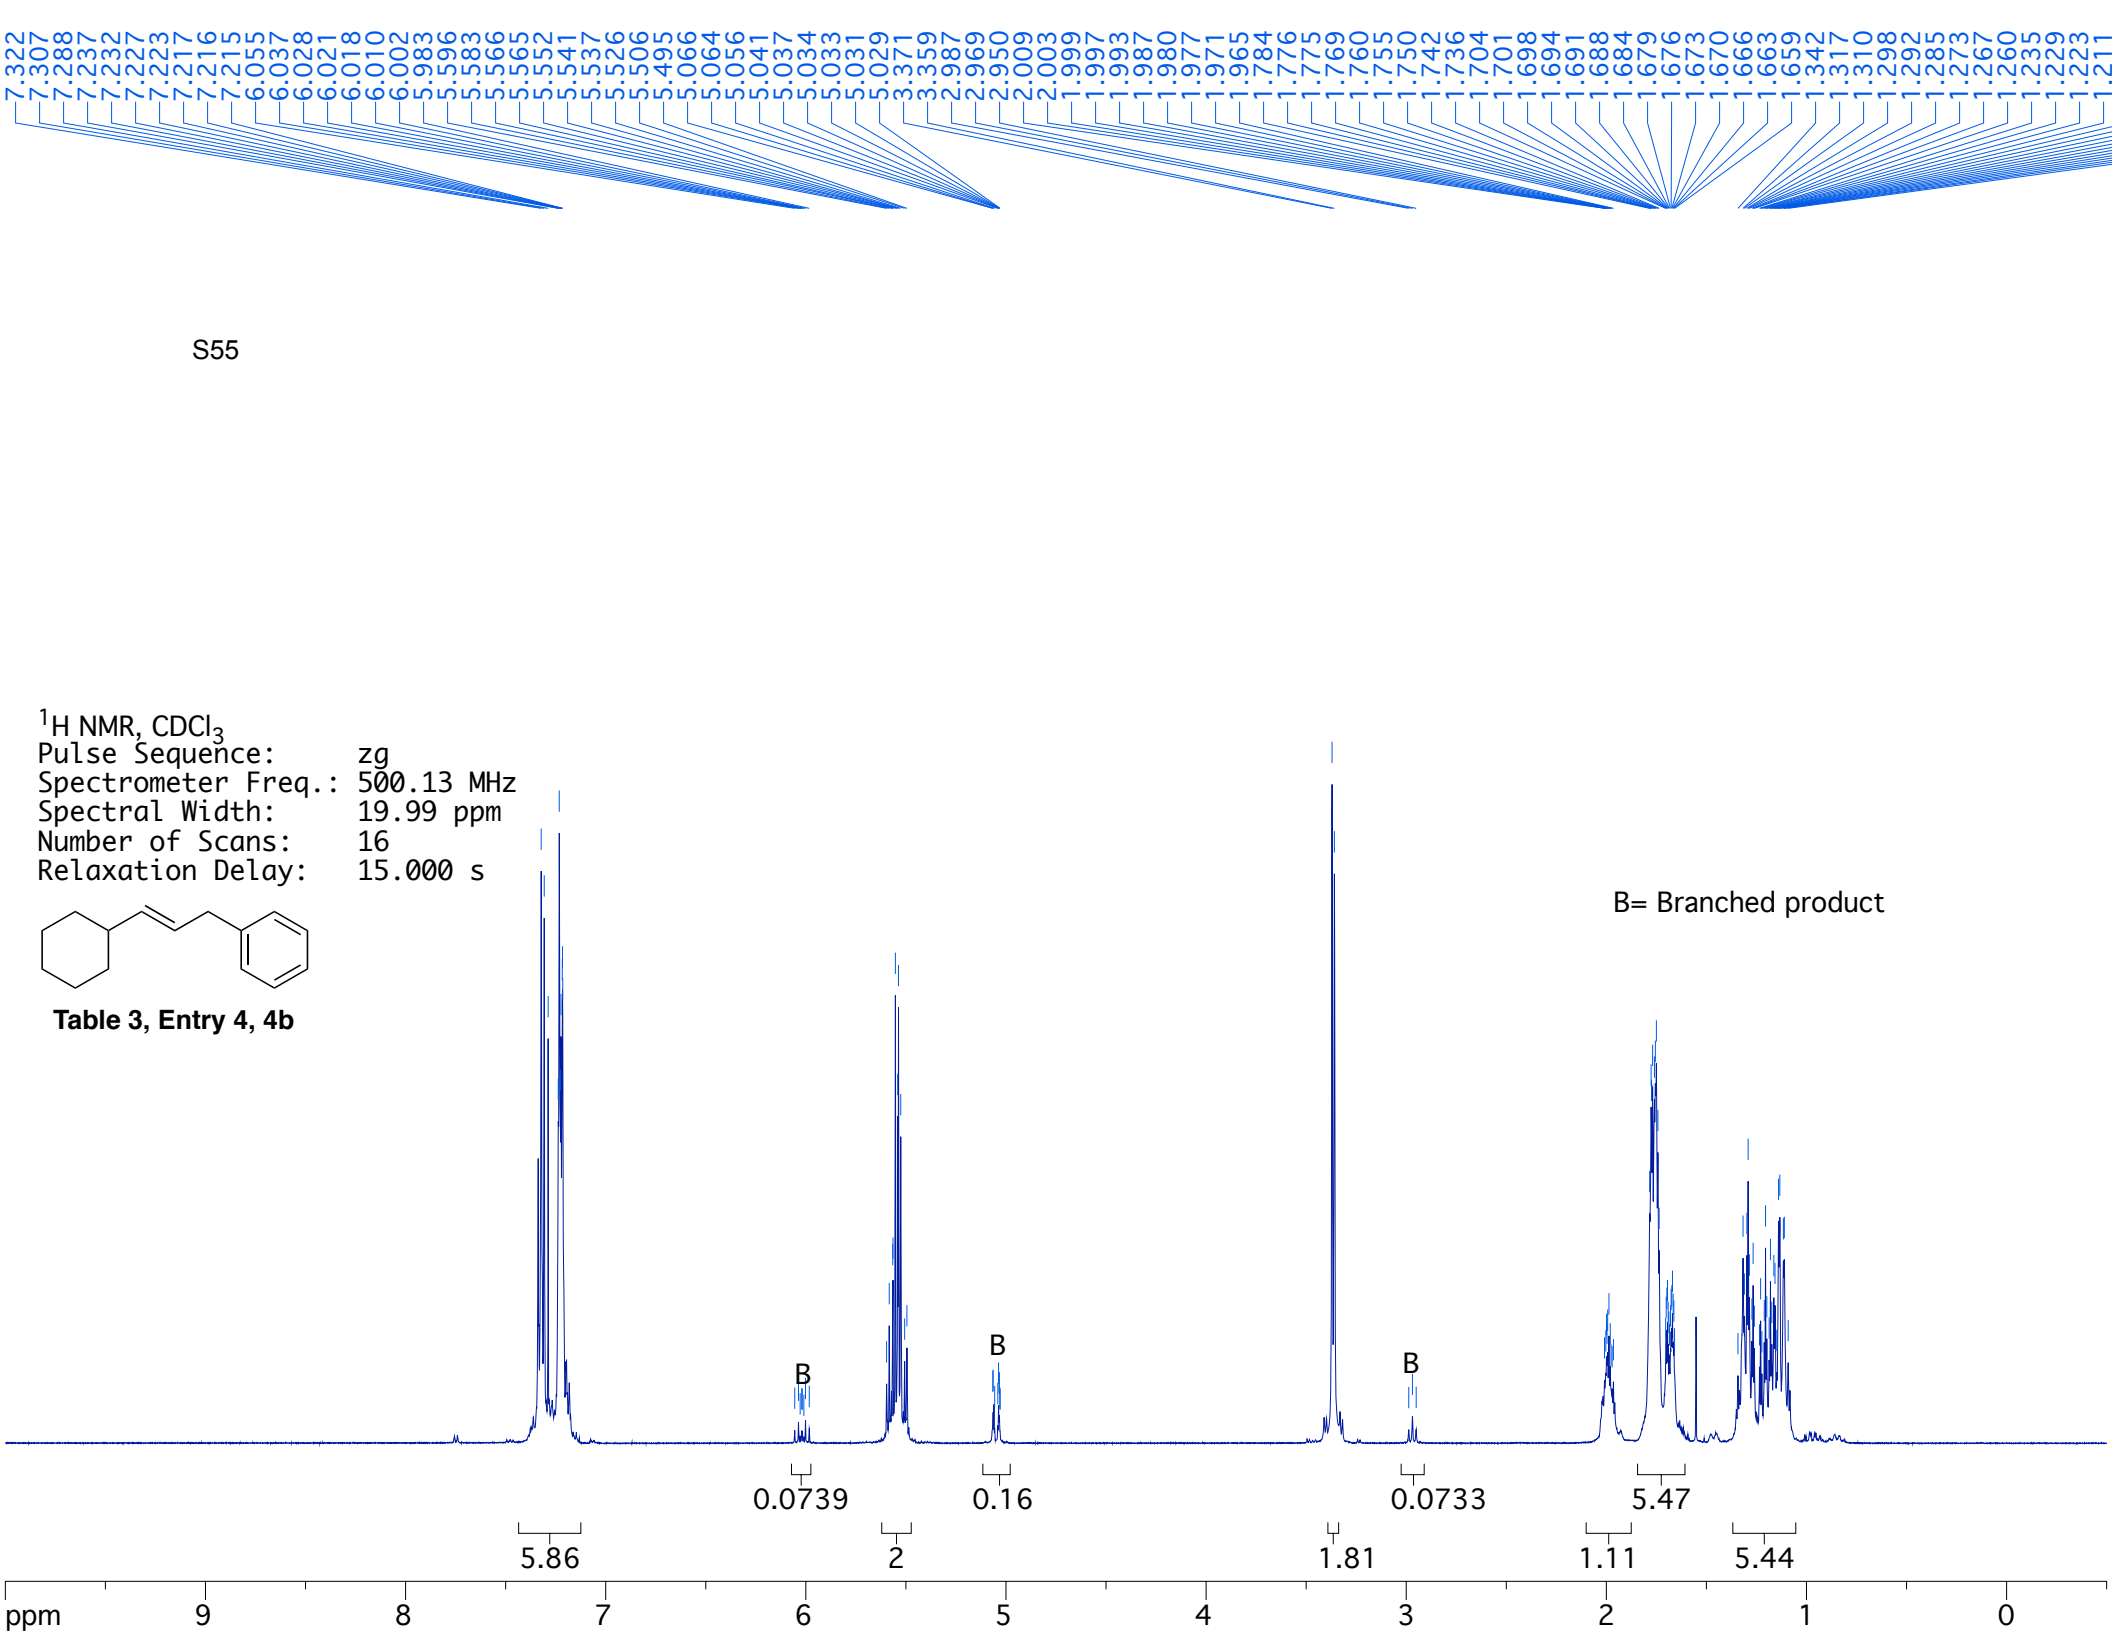

6.055  
6.037  
6.028  
6.021  
6.018  
6.010  
6.002  
5.983

5.066  
5.064  
5.060  
5.056  
5.041  
5.037  
5.034  
5.033  
5.031  
5.029

2.987  
2.969  
2.950

S56

<sup>1</sup>H NMR, CDCl<sub>3</sub> - Expanded from Table 3, Entry 4

Pulse Sequence: zg  
Spectrometer Freq.: 500.13 MHz  
Spectral Width: 19.99 ppm  
Number of Scans: 16  
Relaxation Delay: 15.000 s

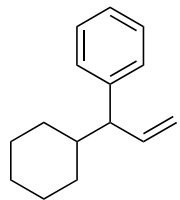

**Branched Product**

B= Branched product

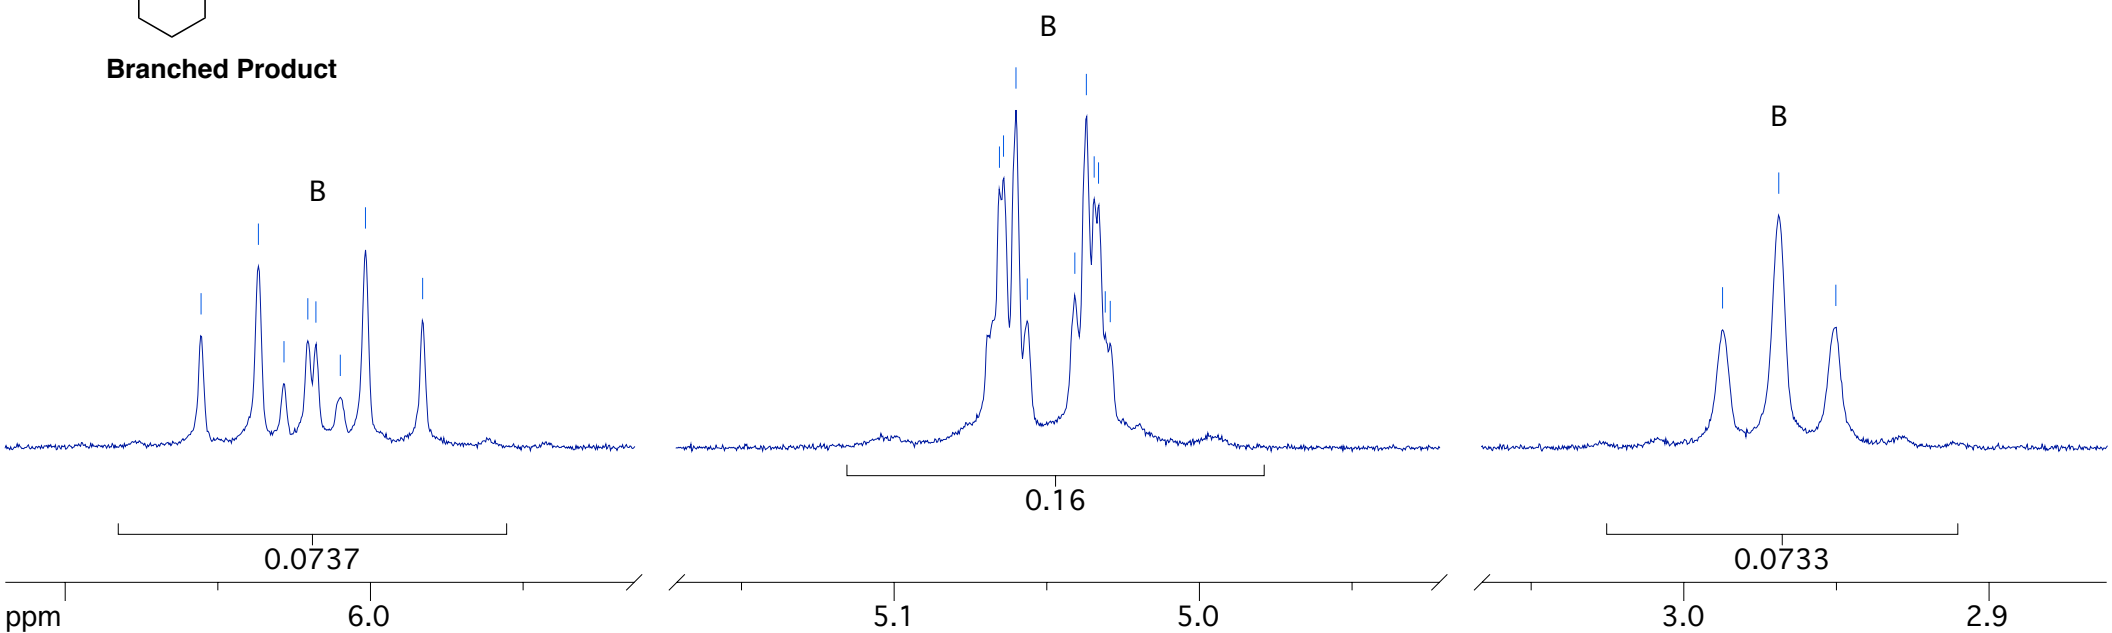

S57

<sup>13</sup>C NMR, CDCl<sub>3</sub>  
Pulse Sequence: zgdc  
Spectrometer Freq.: 125.77 MHz  
Spectral Width: 301.18 ppm  
Number of Scans: 330  
Relaxation Delay: 2.000 s

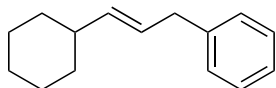

Table 3, Entry 4, 4b

141.246  
138.129  
128.467  
128.305  
126.135  
125.830  
77.283  
77.028  
76.775  
40.656  
39.112  
33.147  
26.244  
26.118

B= Branched product

ppm 200 150 100 50 -0 -50

B

B

B

S58

<sup>1</sup>H NMR, CDCl<sub>3</sub>  
Pulse Sequence: zg  
Spectrometer Freq.: 500.13 MHz  
Spectral Width: 19.99 ppm  
Number of Scans: 16  
Relaxation Delay: 1.000 s

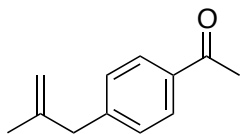

Table 3, Entry 5, 4c

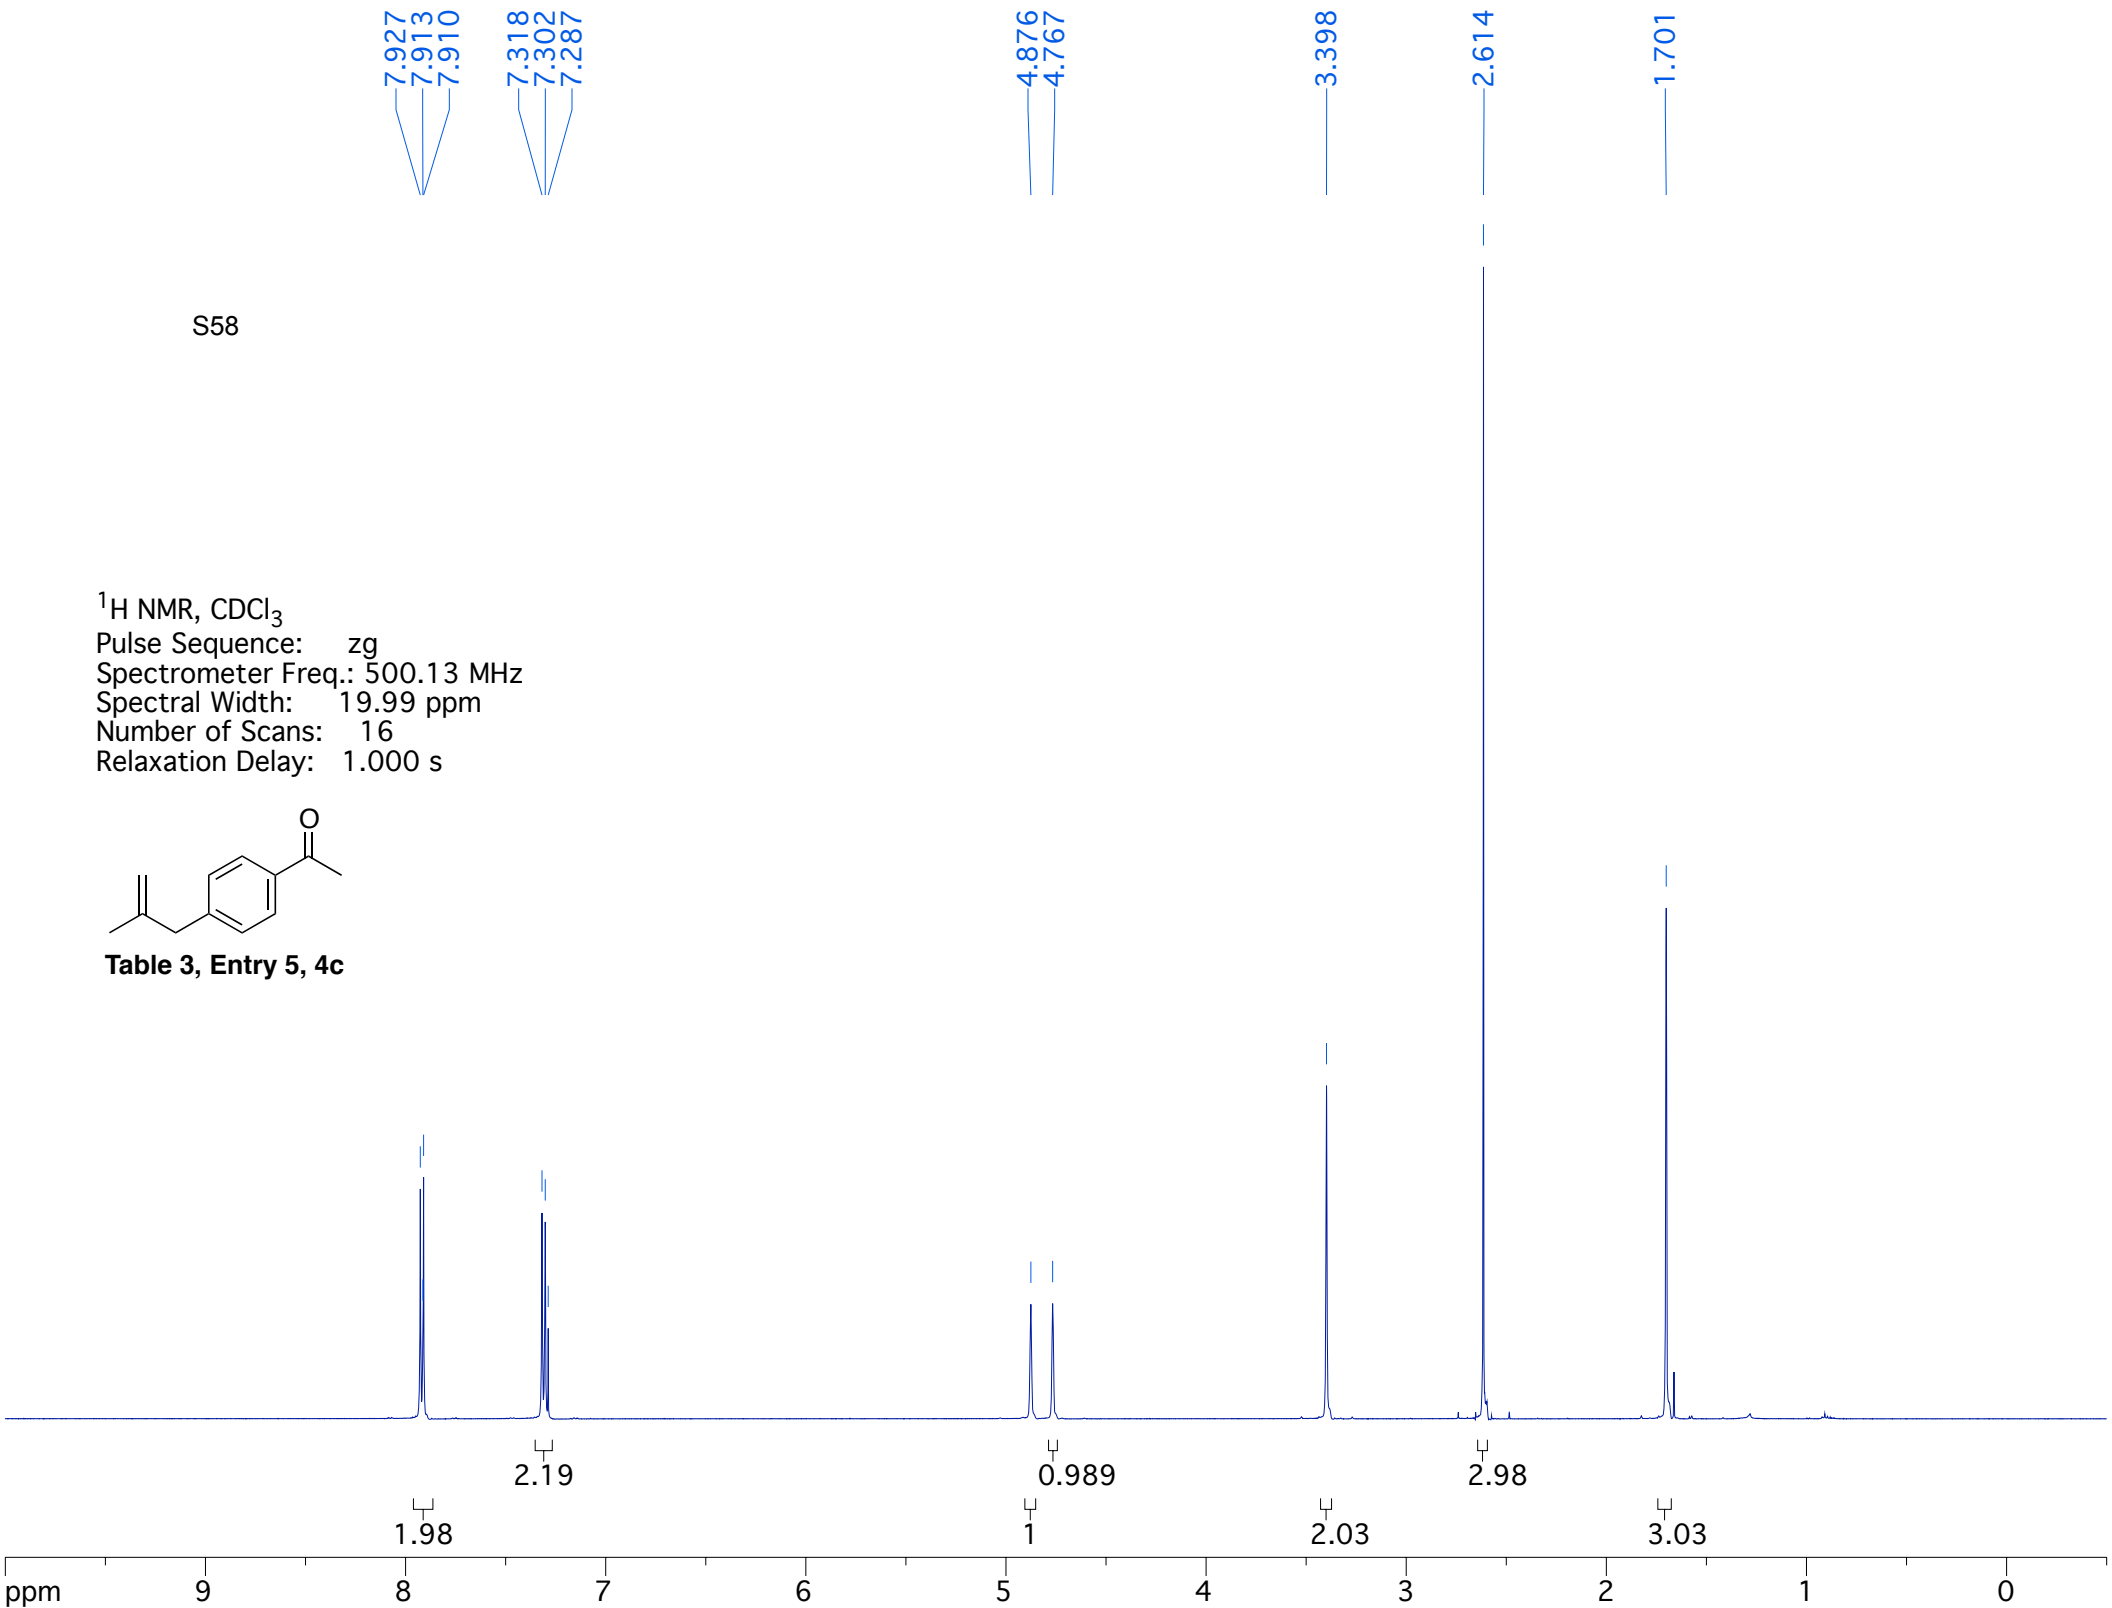

197.845

S59

145.546

144.122

135.344

129.122

128.469

112.688

77.279

77.025

76.770

44.571

26.577

22.082

<sup>13</sup>C NMR, CDCl<sub>3</sub>  
Pulse Sequence: zgdc  
Spectrometer Freq.: 125.77 MHz  
Spectral Width: 301.18 ppm  
Number of Scans: 175  
Relaxation Delay: 2.000 s

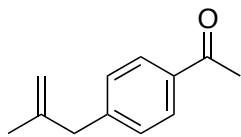

Table 3, Entry 5, 4c

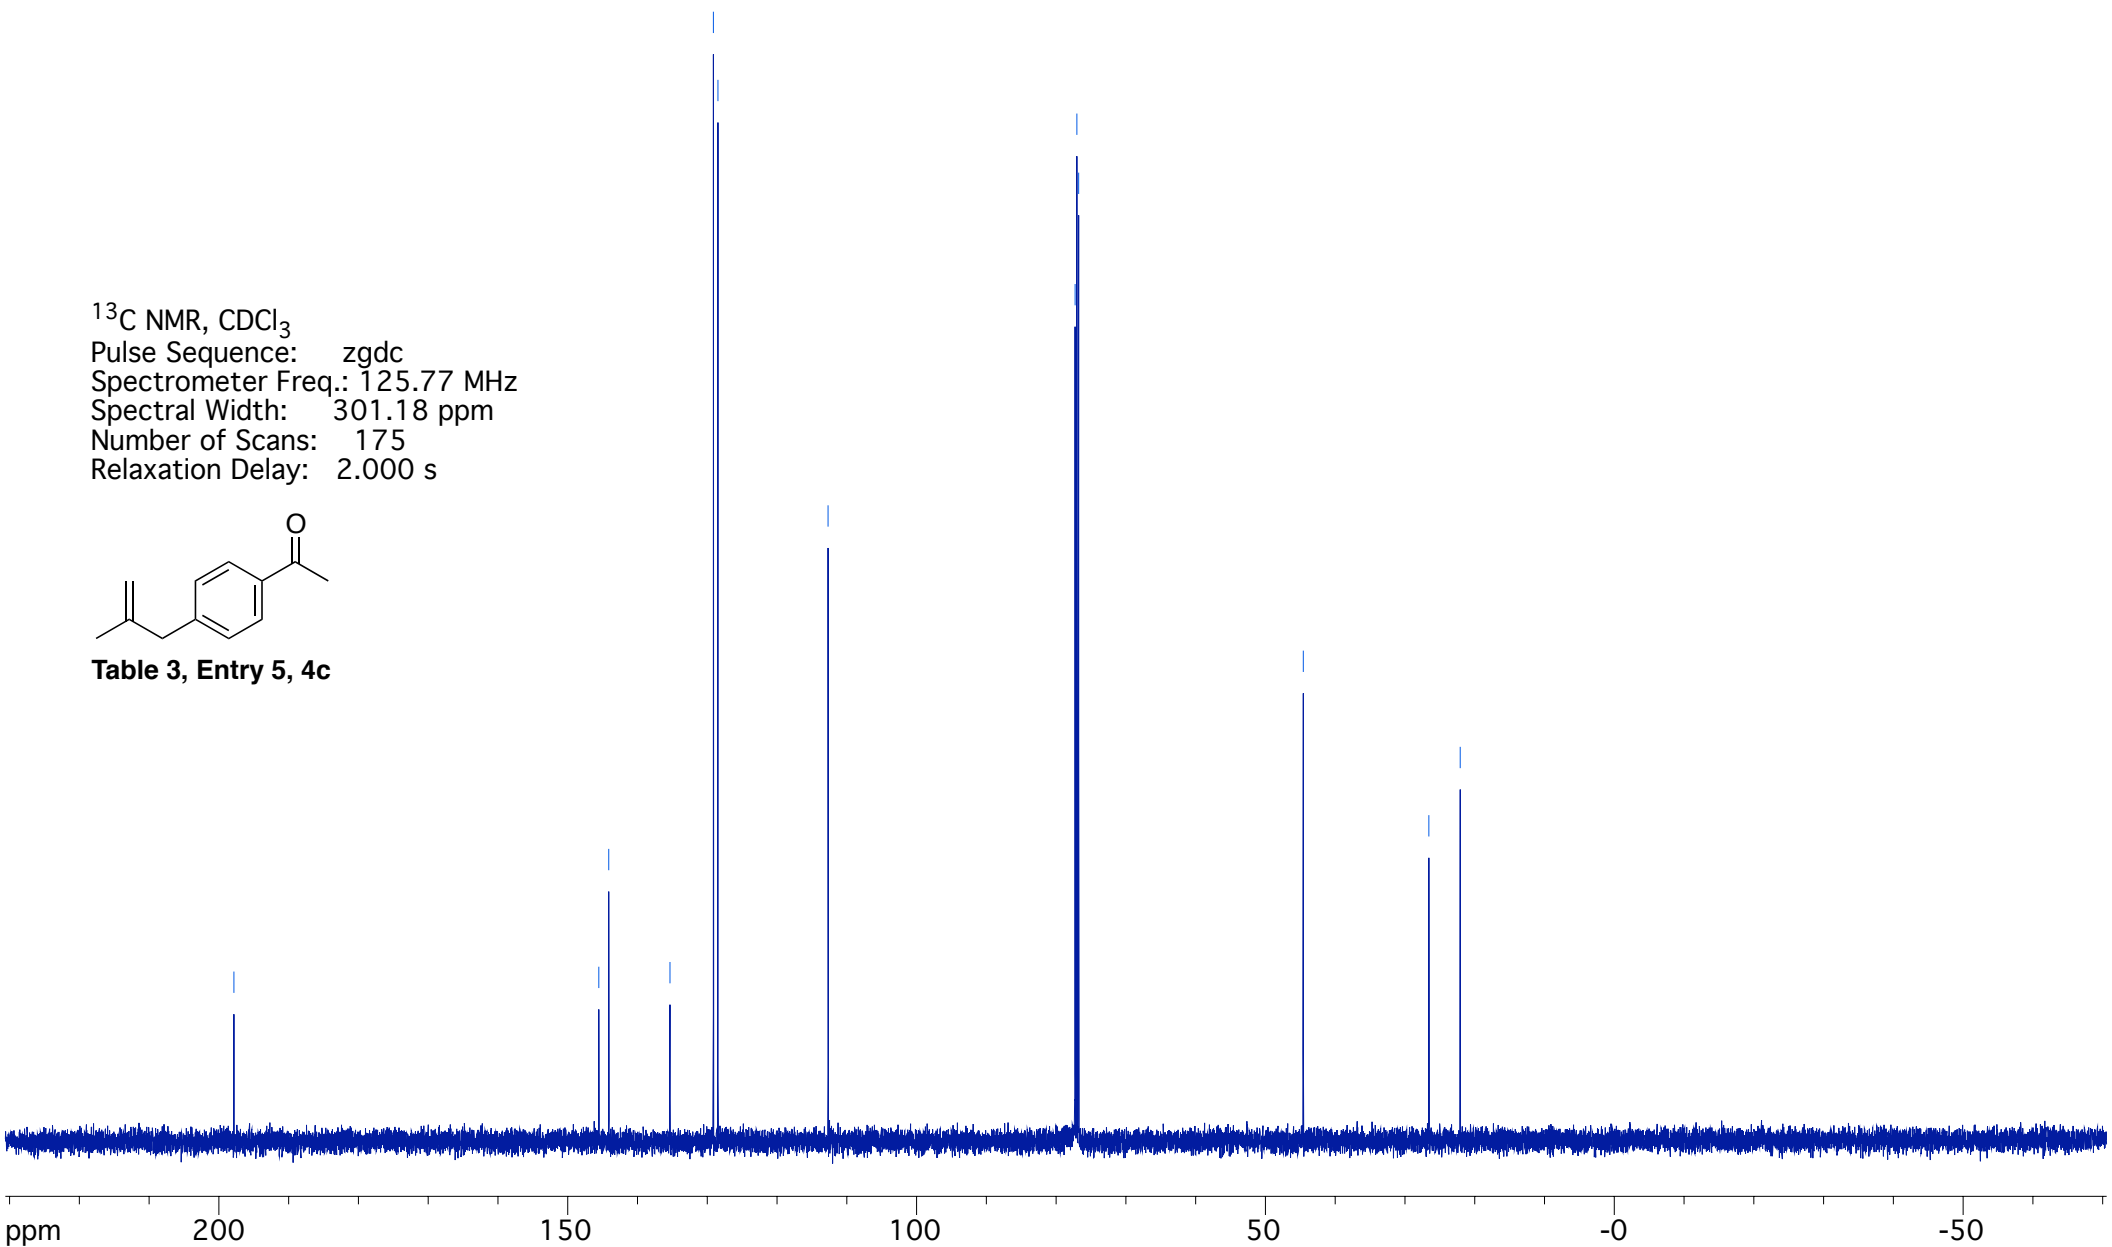

7.349  
7.340  
7.336  
7.324  
7.310  
7.289  
7.247  
7.231  
7.215  
6.132  
6.130  
6.114  
6.112  
6.110  
6.103  
6.101  
6.098  
6.096  
6.094  
6.091  
6.085  
6.083  
6.073  
6.070  
6.068  
6.065  
6.062  
5.763  
5.760  
5.749  
5.748  
5.747  
5.734  
5.721  
5.707  
5.704  
5.702  
5.688  
5.675  
5.662  
5.661  
5.650  
5.647  
3.443  
3.429

1.799  
1.795  
1.785  
1.773

S60

<sup>1</sup>H NMR, CDCl<sub>3</sub>  
Pulse Sequence: zg  
Spectrometer Freq.: 500.13 MHz  
Spectral Width: 19.99 ppm  
Number of Scans: 16  
Relaxation Delay: 1.000 s

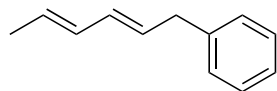

Table 3, Entry 6, 4d

EE= EE olefin  
EZ= EZ olefin  
OM= other minor olefin

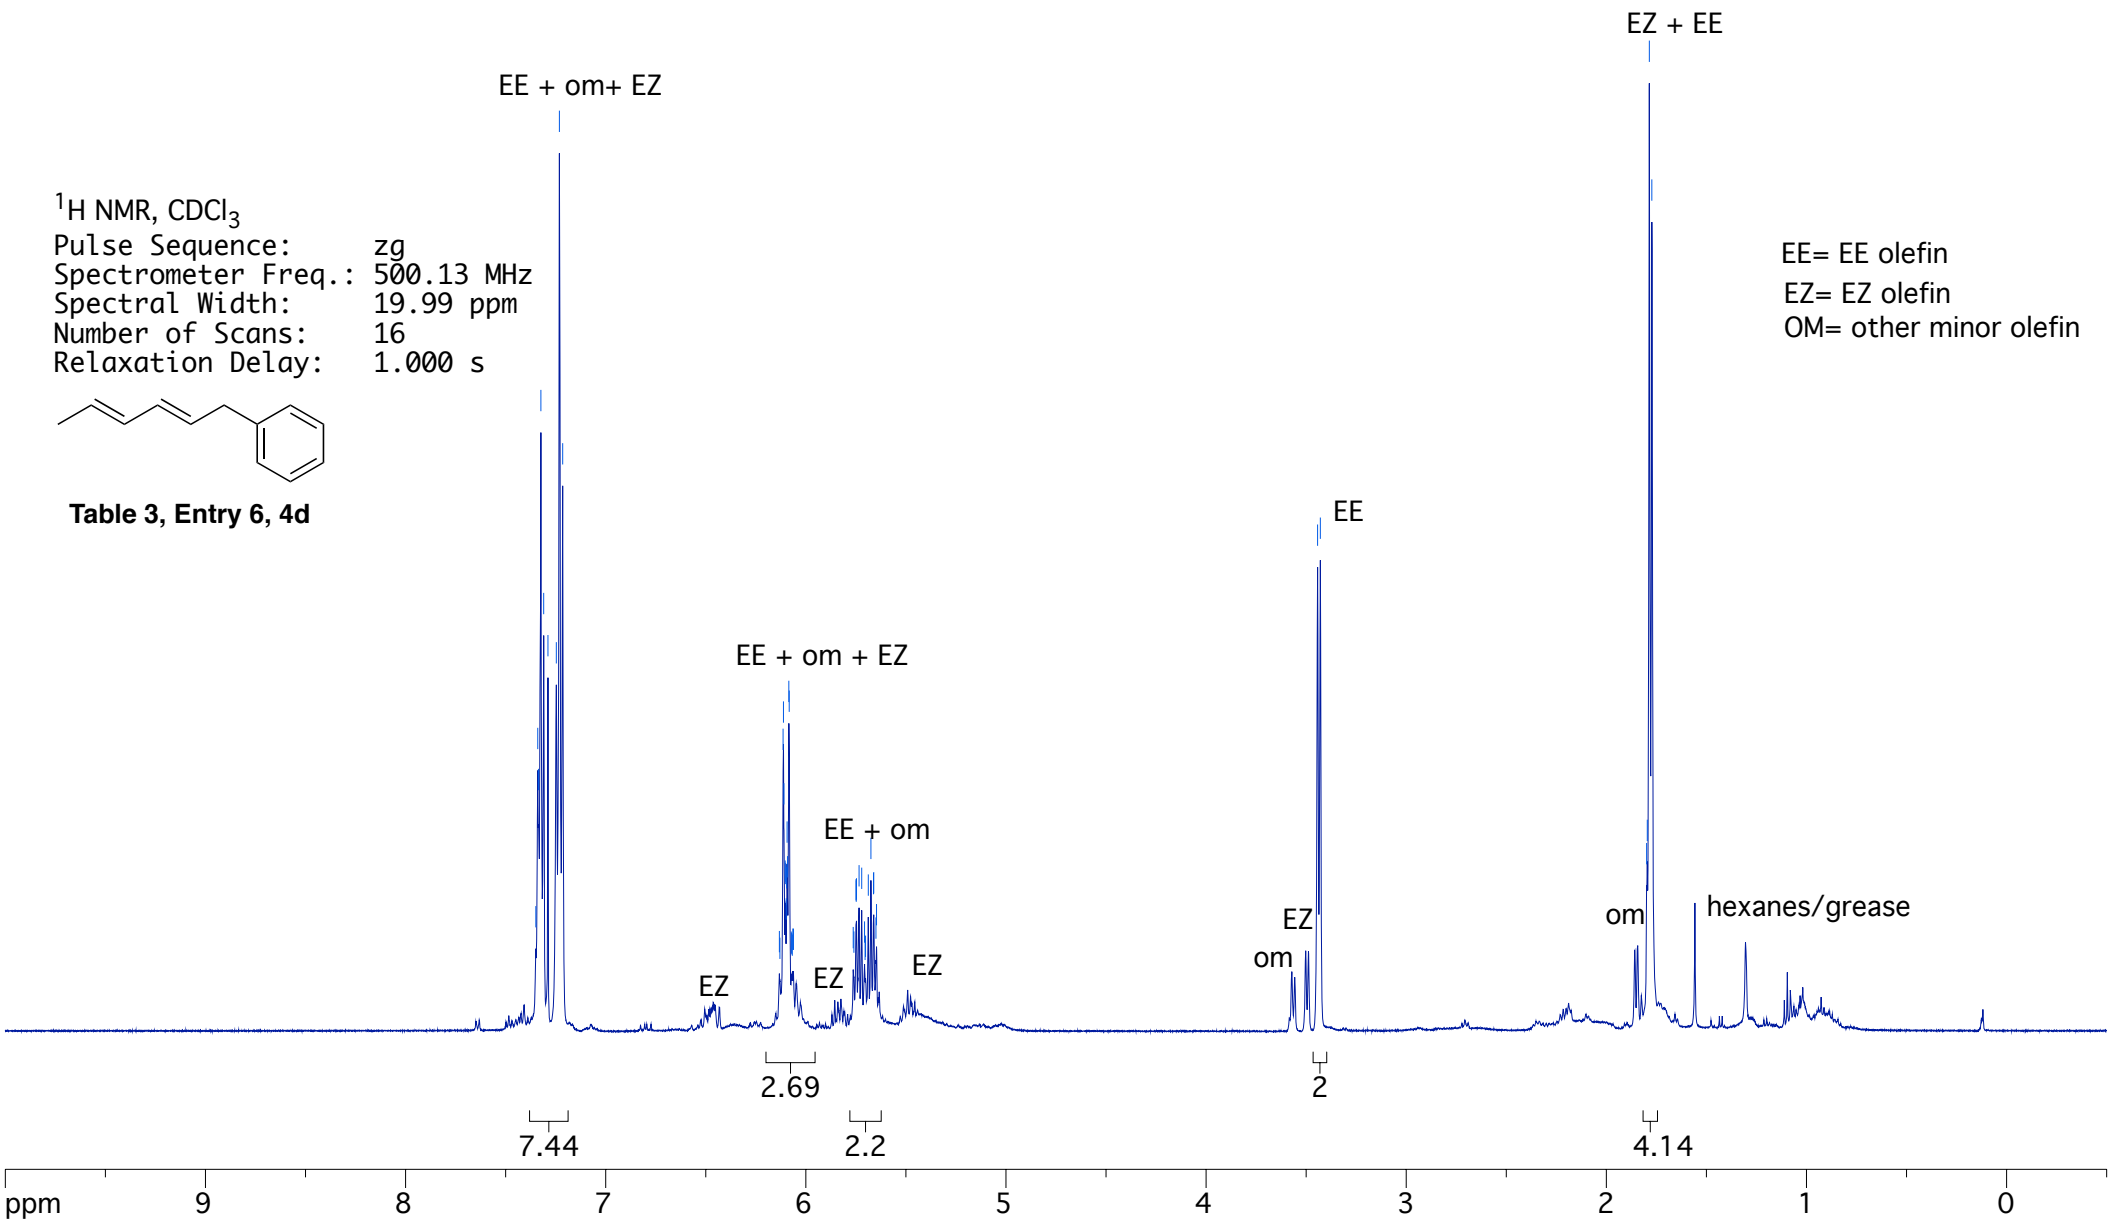

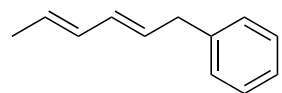

Table 3, Entry 6, 4d

$^{13}\text{C}$  NMR,  $\text{CDCl}_3$   
Pulse Sequence: zgdc  
Spectrometer Freq.: 125.77 MHz  
Spectral Width: 301.18 ppm  
Number of Scans: 311  
Relaxation Delay: 2.000 s

S61

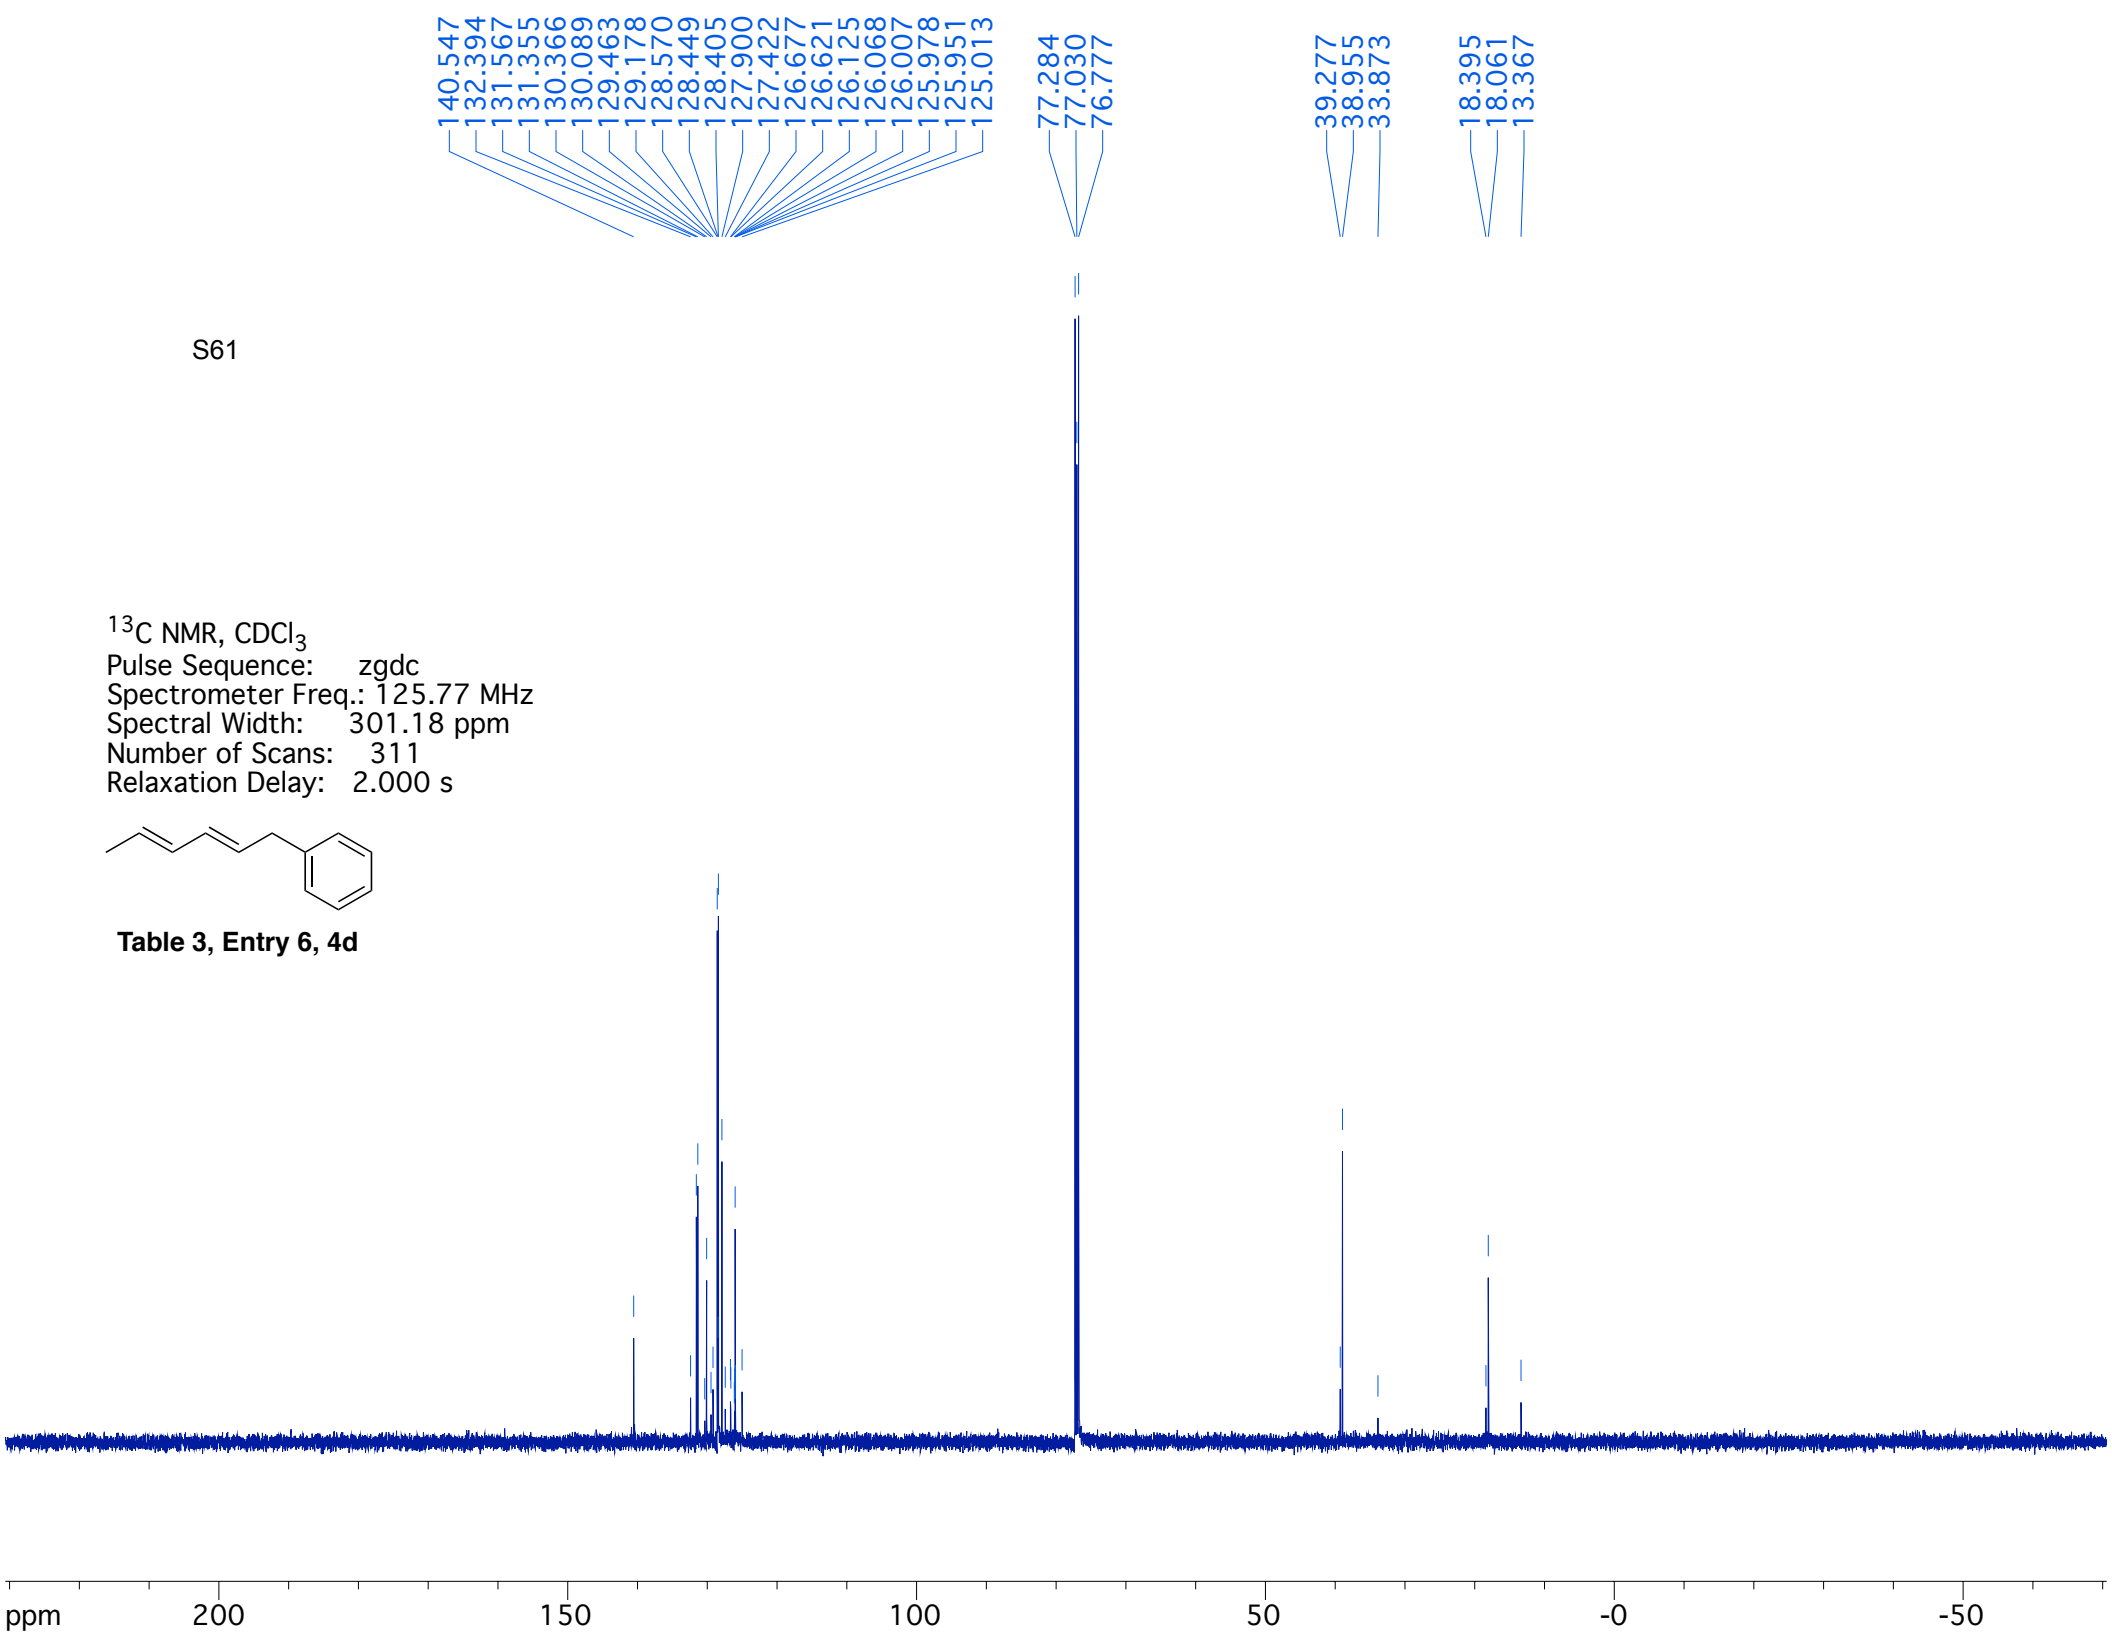



7.356  
7.353  
7.349  
7.329  
7.313  
7.298  
7.289  
7.228  
7.213

3.408  
3.393

2.183  
2.151  
2.149  
2.109  
1.787  
1.749  
1.724  
1.695  
1.658  
1.640  
1.552  
1.424

S62

<sup>1</sup>H NMR, CDCl<sub>3</sub>  
Pulse Sequence: zg  
Spectrometer Freq.: 500.13 MHz  
Spectral Width: 19.99 ppm  
Number of Scans: 16  
Relaxation Delay: 1.000 s

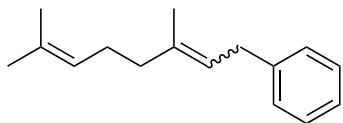

Table 3, Entry 7, 4e

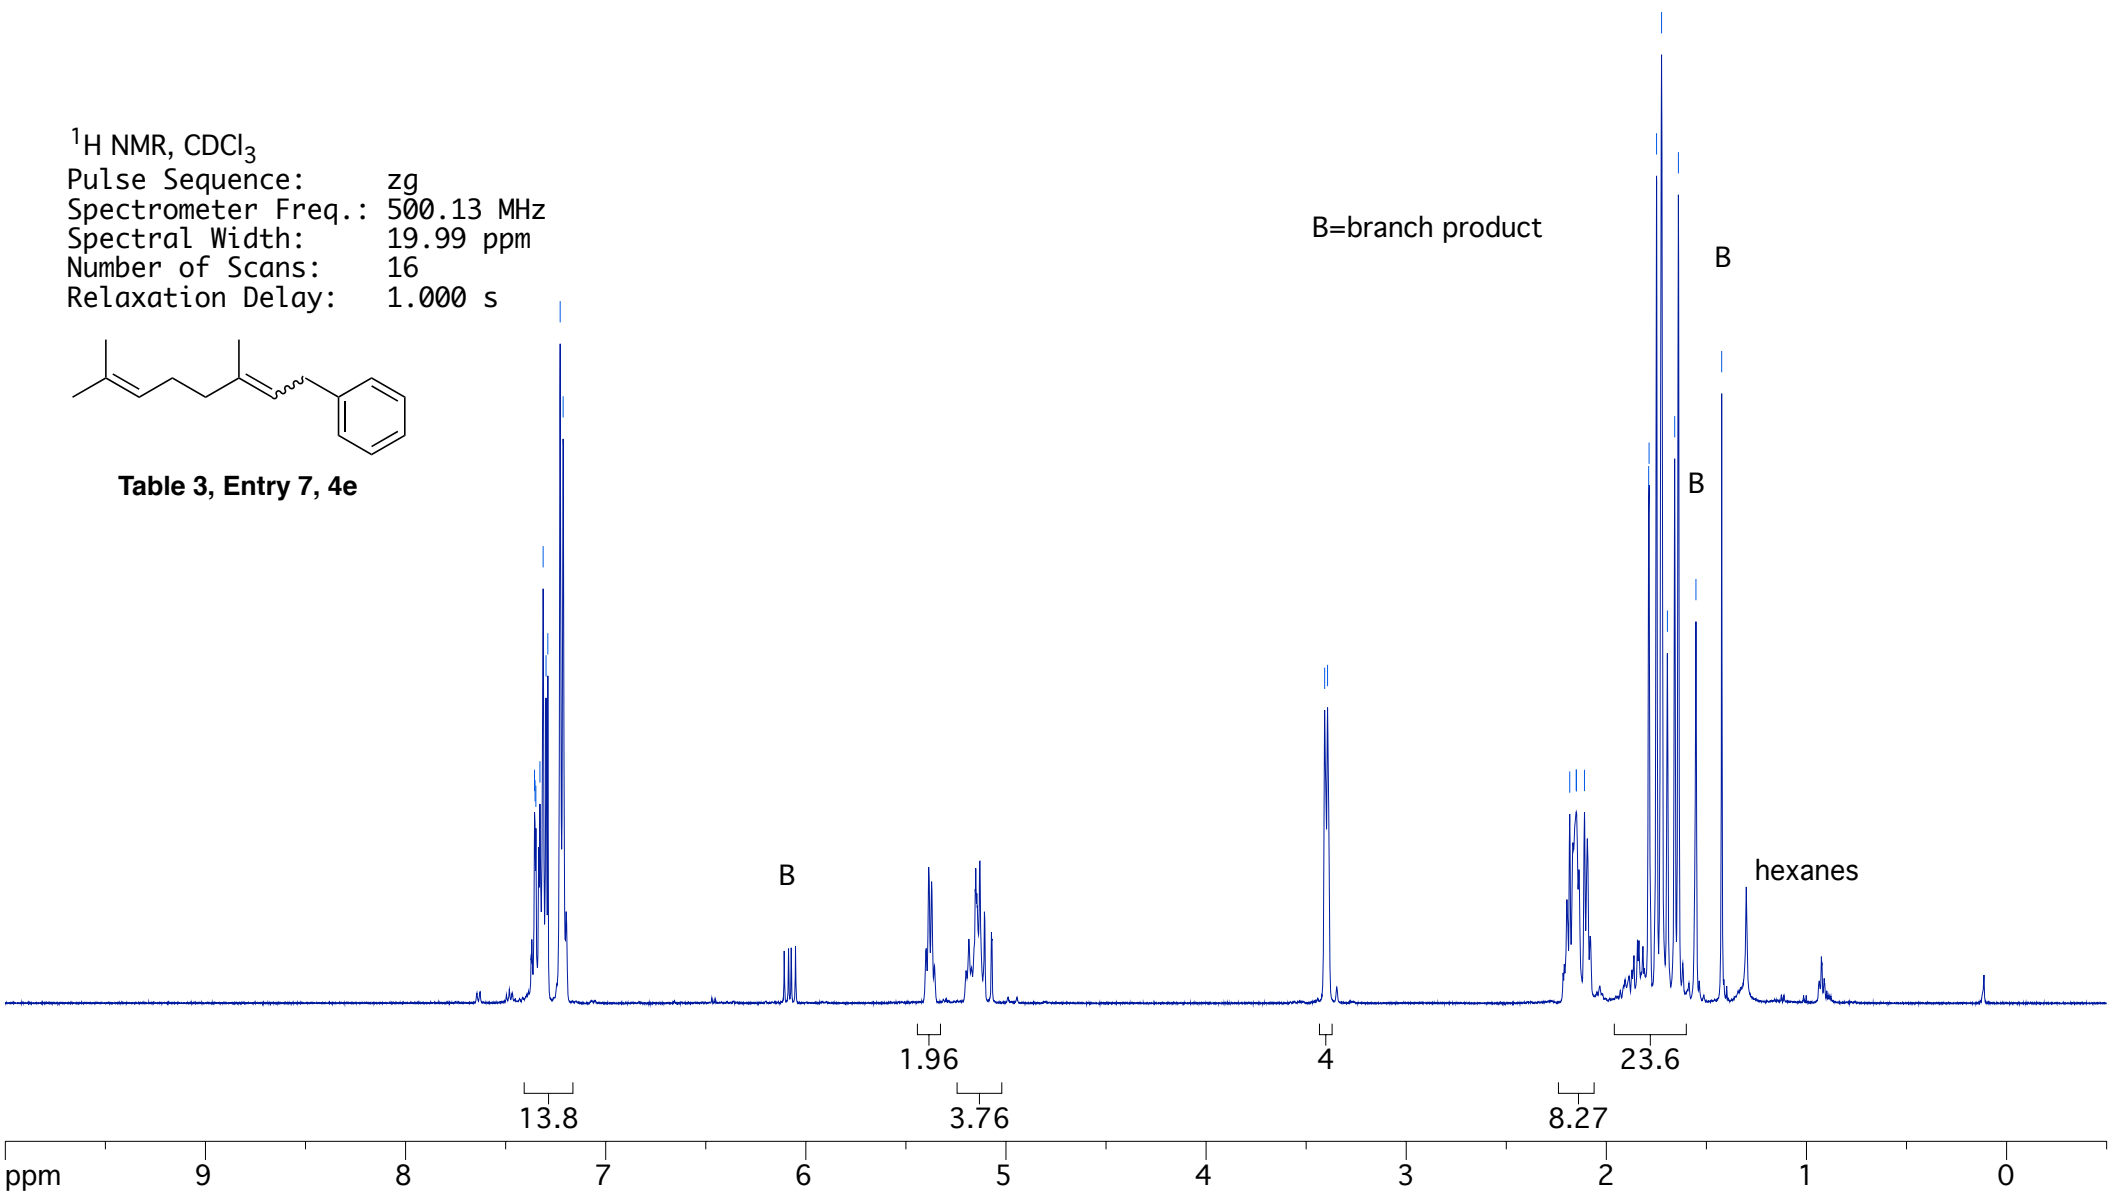

<sup>13</sup>C NMR, CDCl<sub>3</sub>  
Pulse Sequence: zgdc  
Spectrometer Freq.: 125.77 MHz  
Spectral Width: 301.18 ppm  
Number of Scans: 816  
Relaxation Delay: 2.000 s

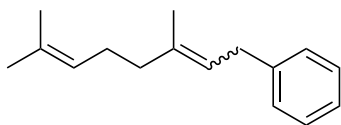

Table 3, Entry 7, 4e

S63

147.588  
147.046  
141.982  
141.936  
136.349  
136.320  
131.881  
131.605  
131.485  
128.498  
128.471  
128.453  
128.195  
126.742  
125.870  
125.832  
125.805  
124.813  
124.409  
124.335  
123.978  
123.176  
111.858  
77.414  
77.160  
76.907  
44.443  
41.255  
39.867  
34.334  
34.267  
32.138  
26.745  
25.862  
25.831  
25.025  
23.580  
23.443  
17.851  
17.817  
17.707  
16.263

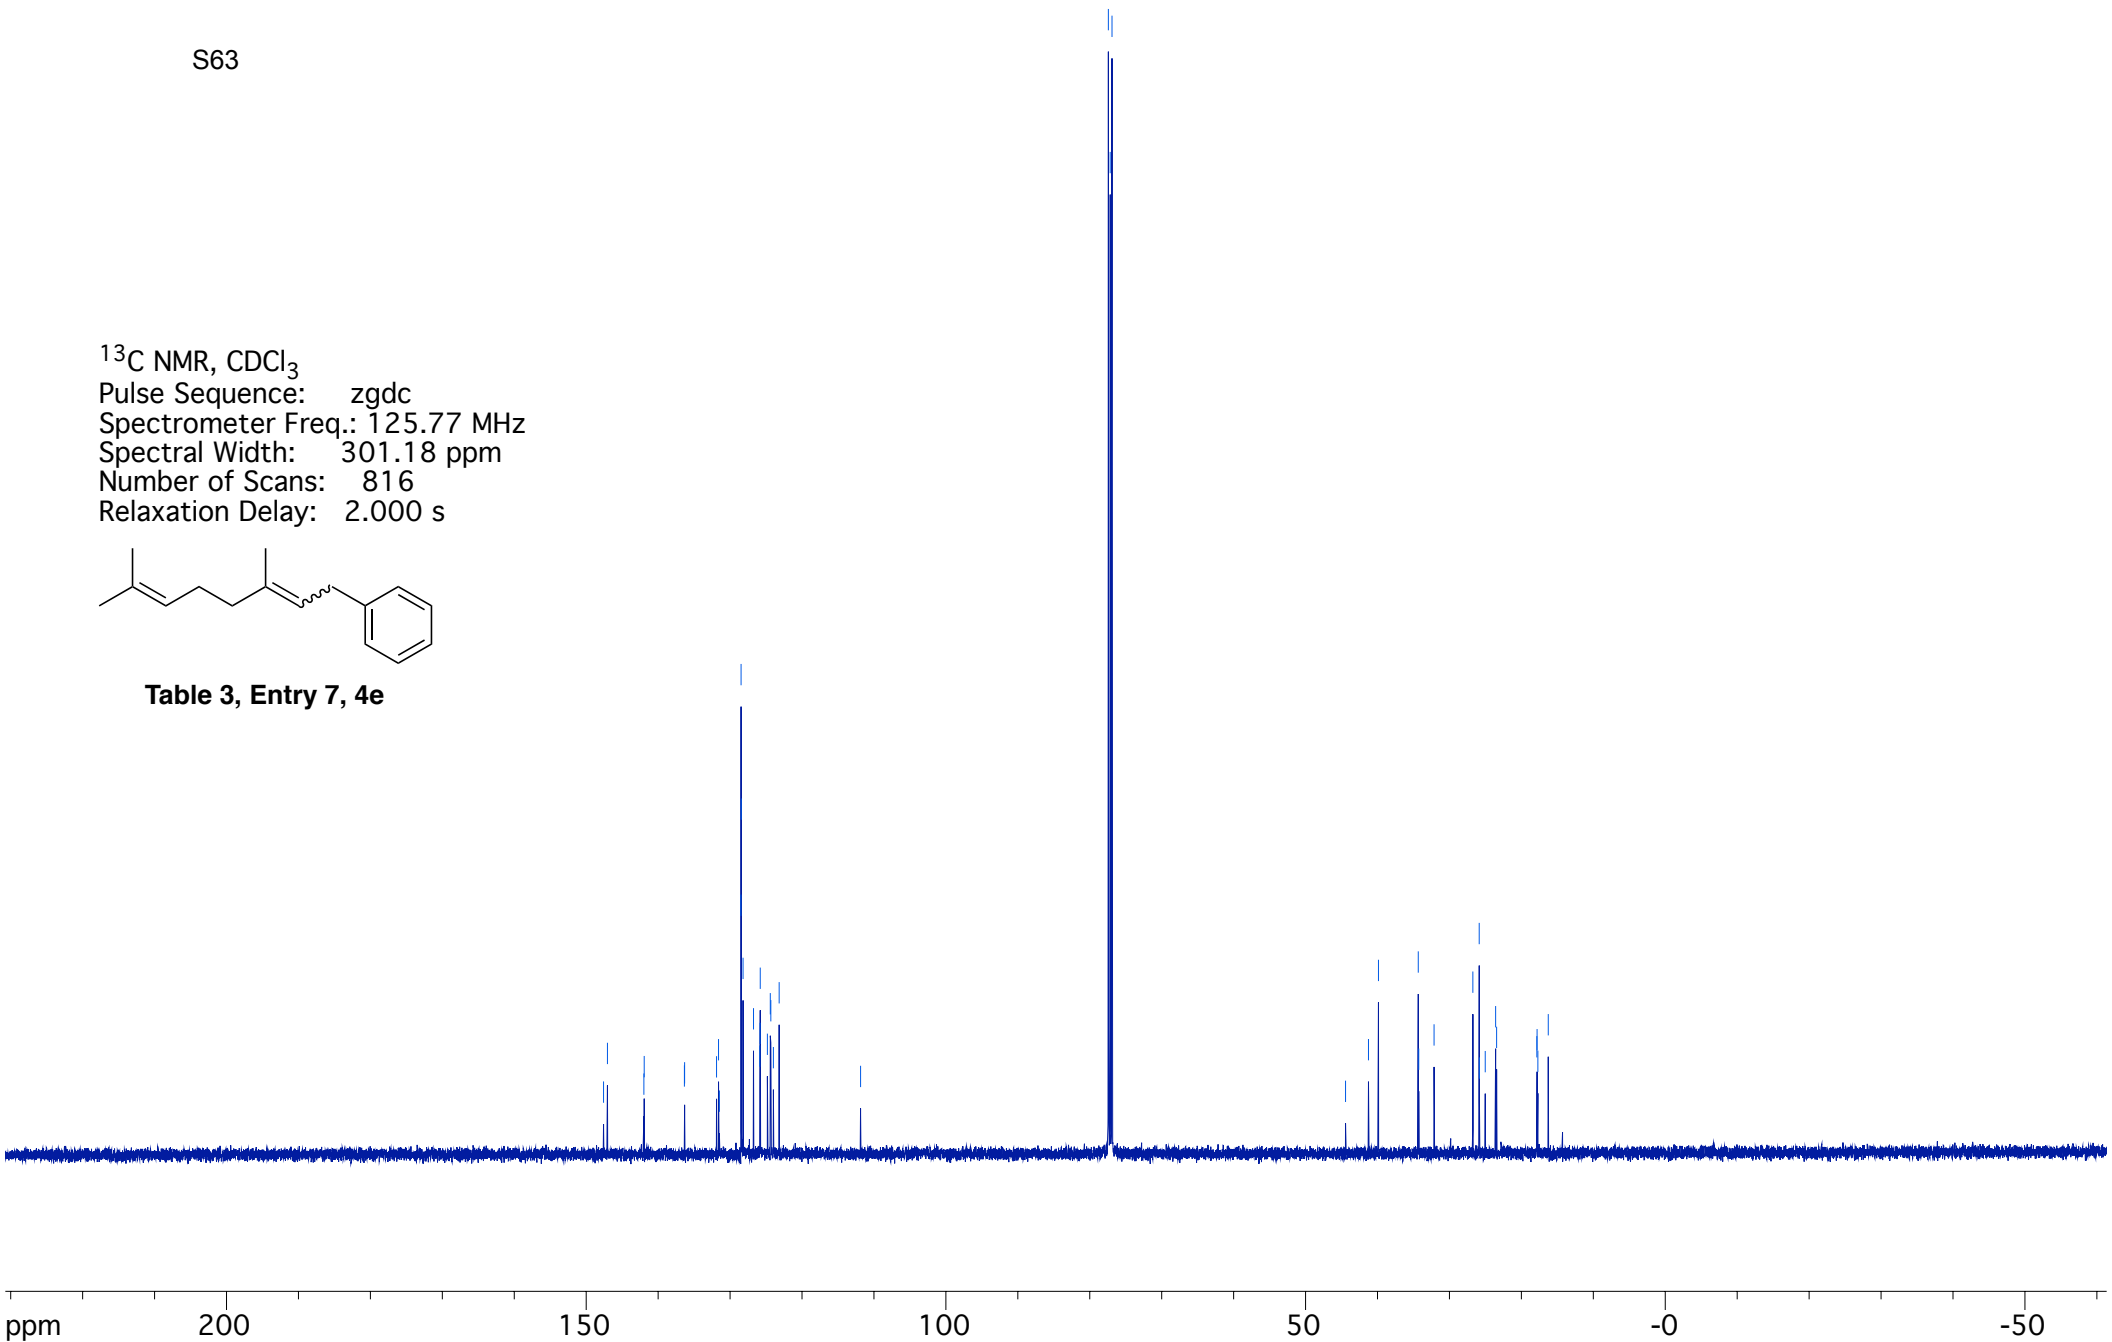

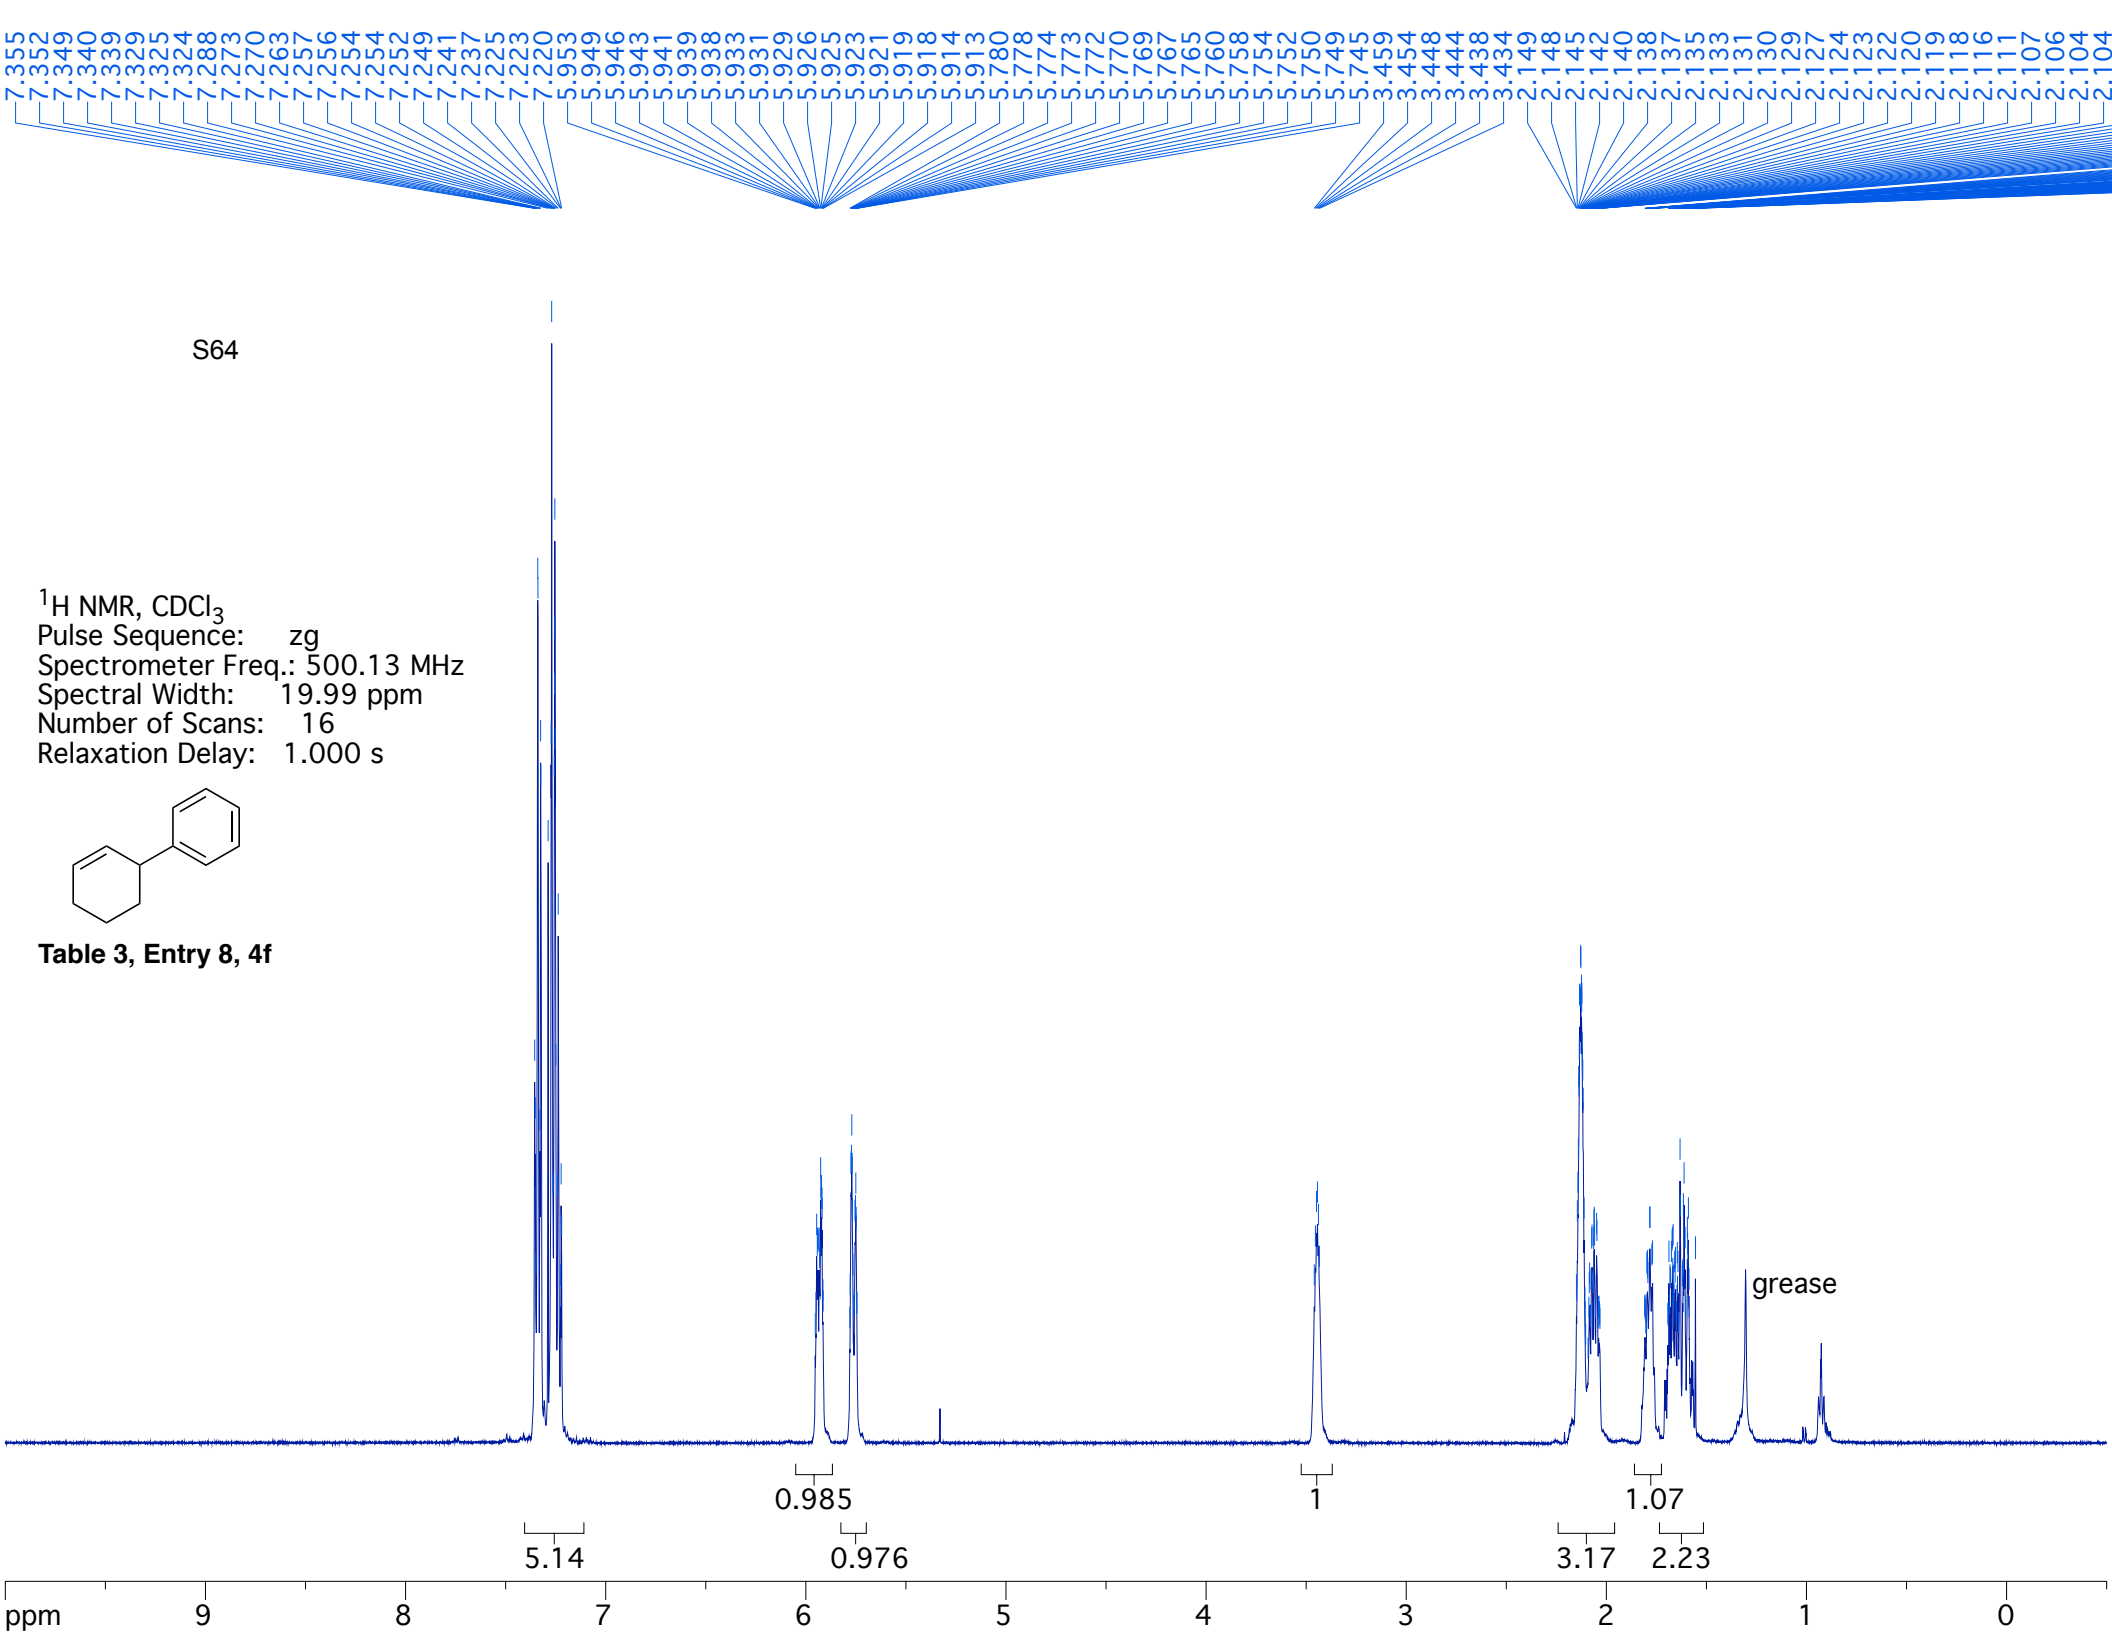

S65

146.669  
130.190  
128.360  
128.269  
127.745  
125.960  
77.275  
77.020  
76.768  
41.880  
32.635  
25.040  
21.217

$^{13}\text{C}$  NMR,  $\text{CDCl}_3$   
Pulse Sequence: zgdc  
Spectrometer Freq.: 125.77 MHz  
Spectral Width: 301.18 ppm  
Number of Scans: 435  
Relaxation Delay: 2.000 s

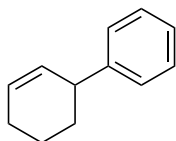

Table 3, Entry 8, 4f

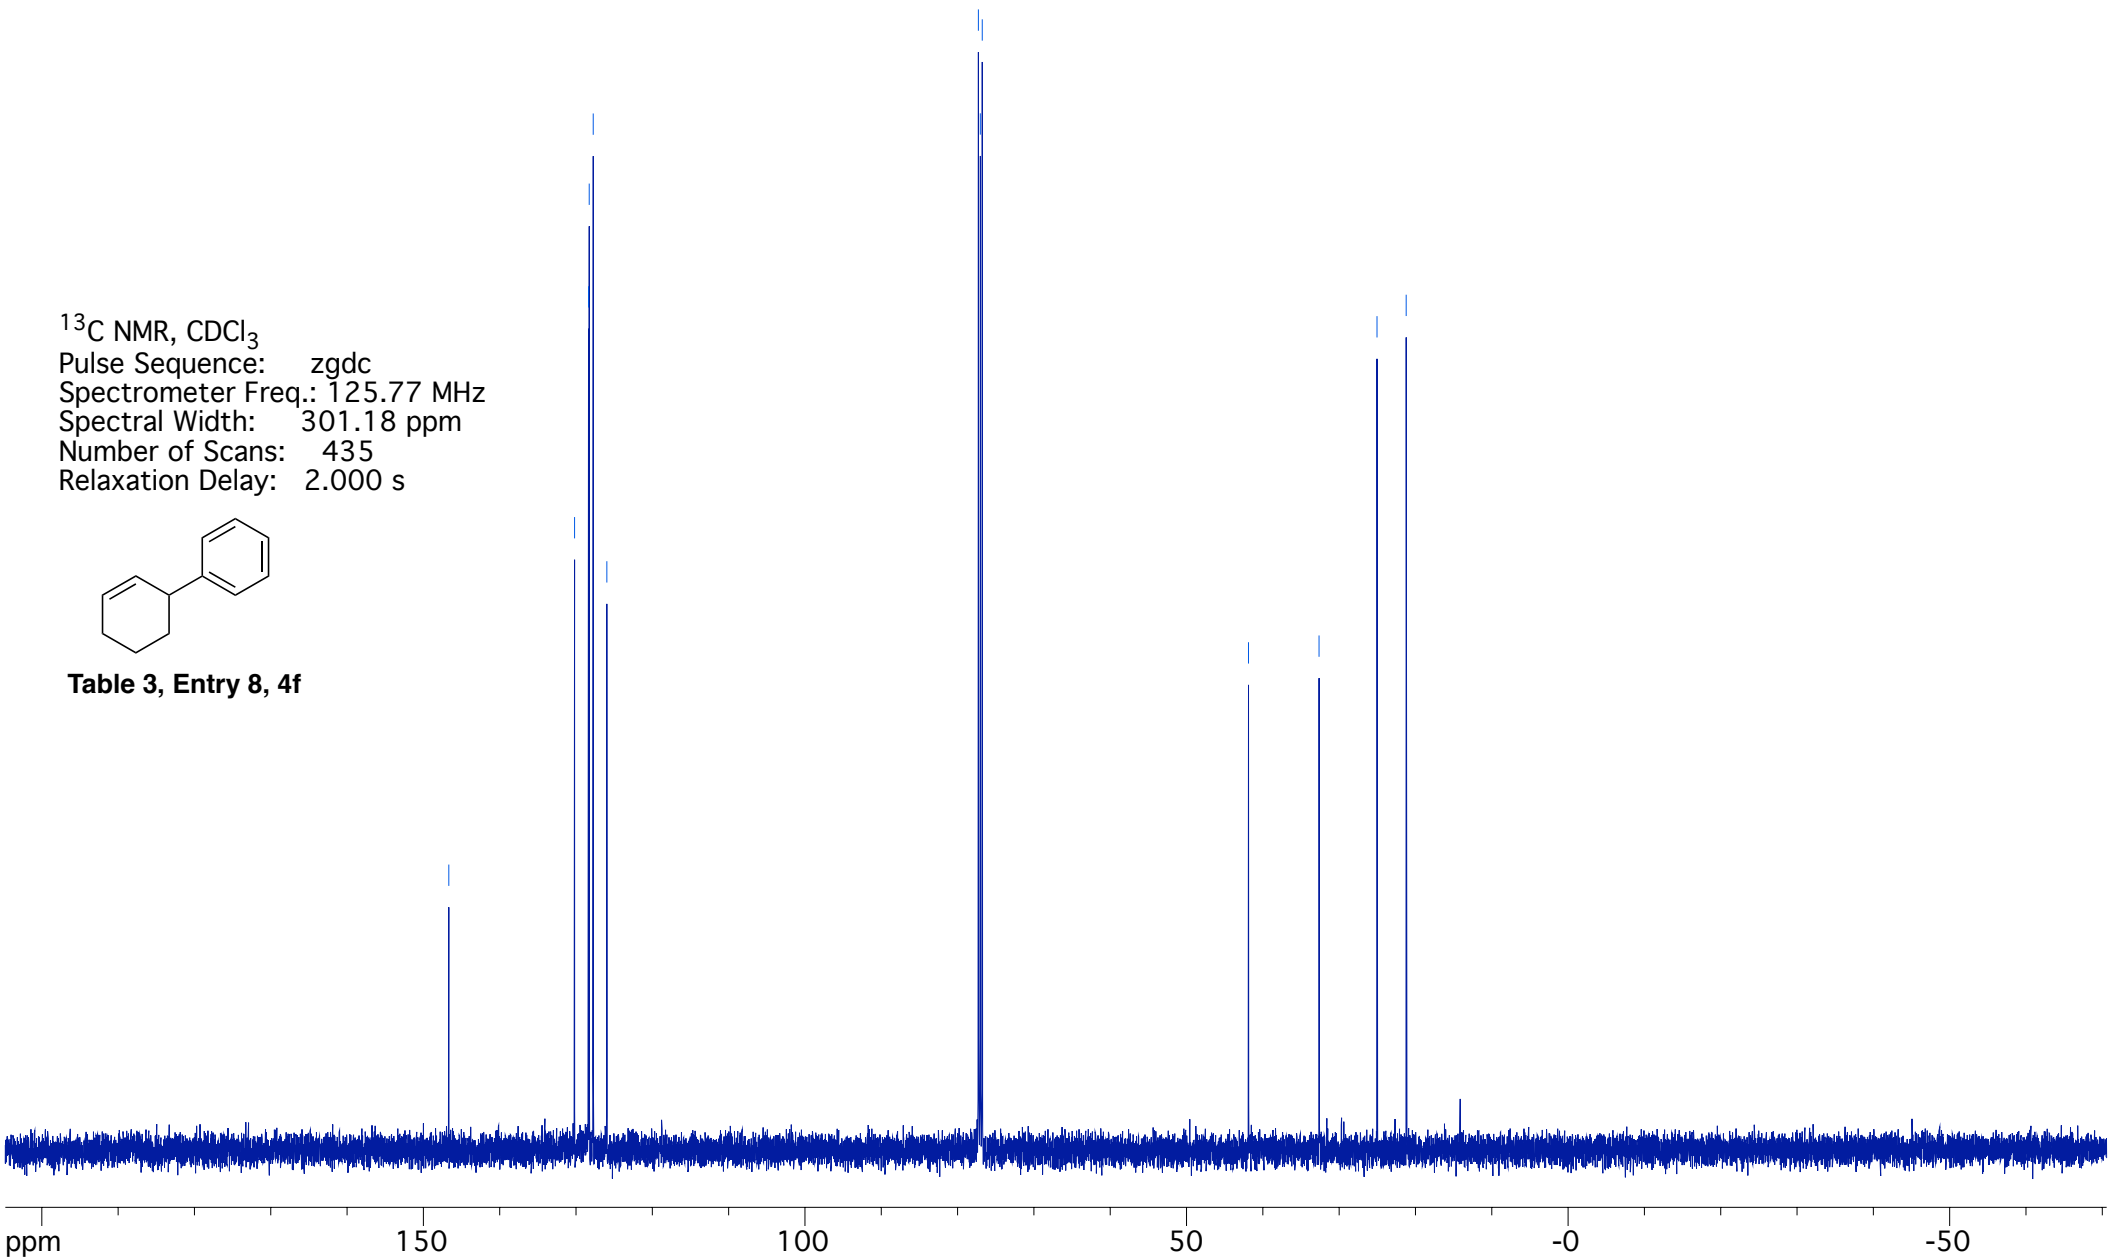

S66

<sup>1</sup>H NMR, CDCl<sub>3</sub>  
Pulse Sequence: zg  
Spectrometer Freq.: 400.13 MHz  
Spectral Width: 20.42 ppm  
Number of Scans: 16  
Relaxation Delay: 1.000 s

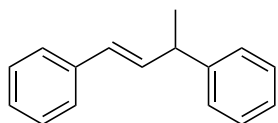

Table 3, Entry 9, 4g

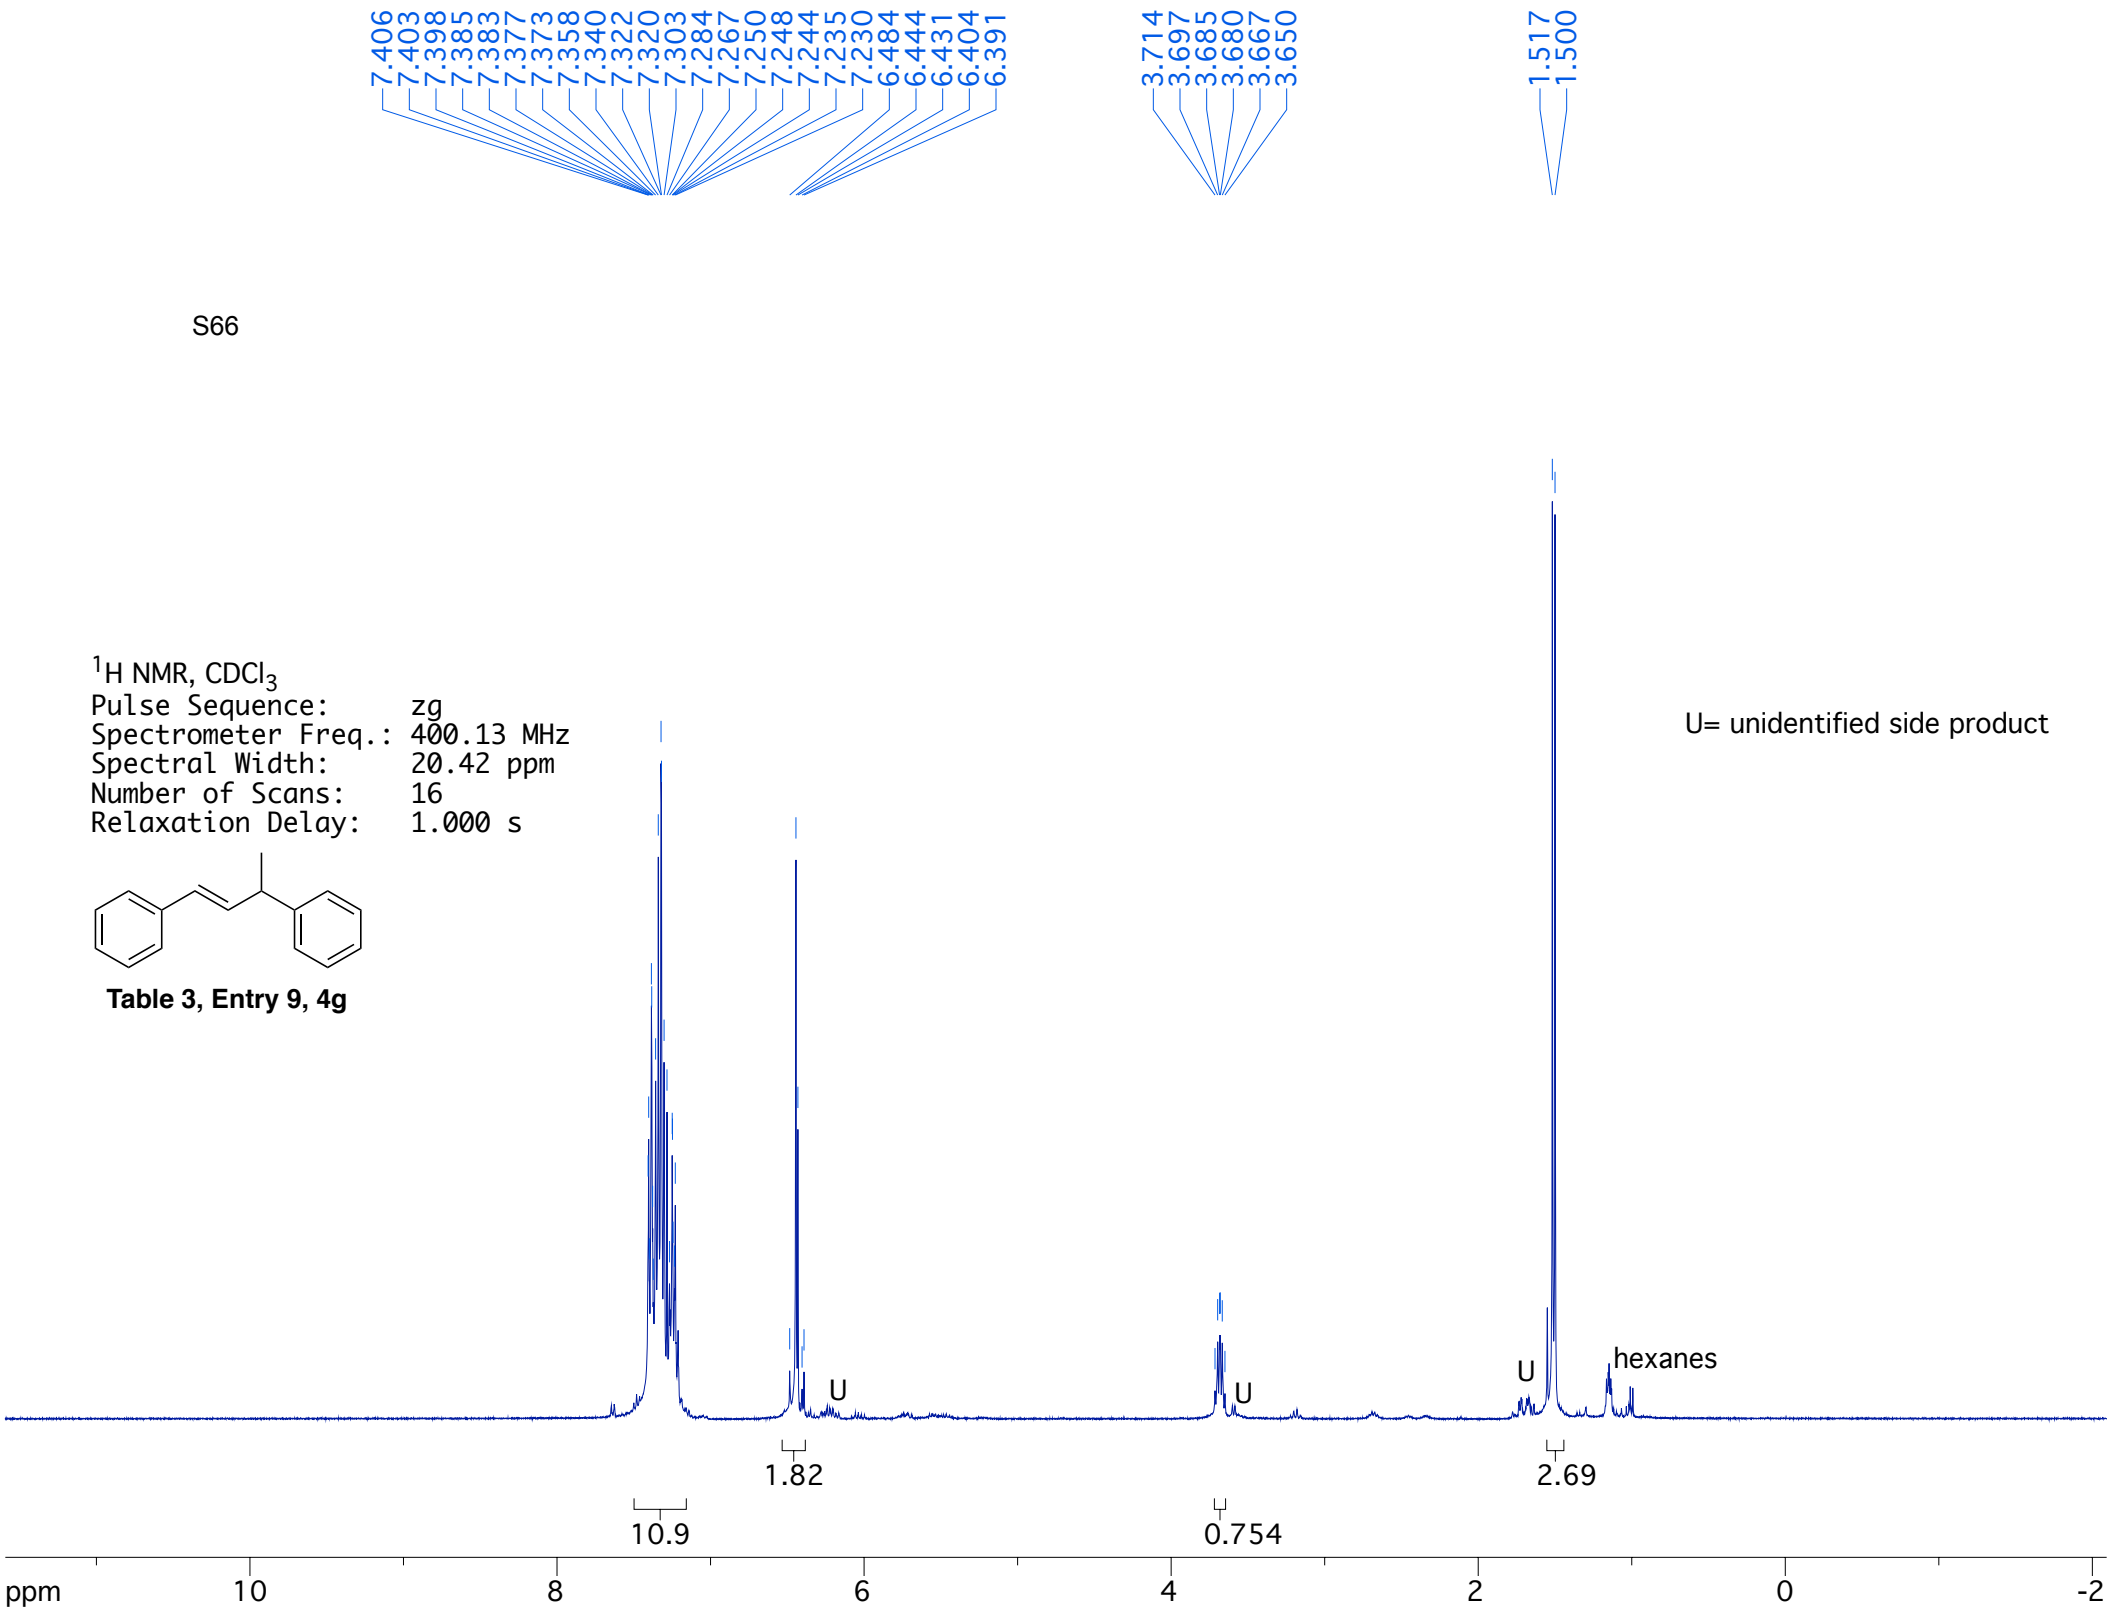

S67

<sup>13</sup>C NMR, CDCl<sub>3</sub>  
Pulse Sequence: zgdc  
Spectrometer Freq.: 125.77 MHz  
Spectral Width: 301.18 ppm  
Number of Scans: 400  
Relaxation Delay: 2.000 s

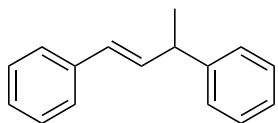

Table 3, Entry 9, 4g

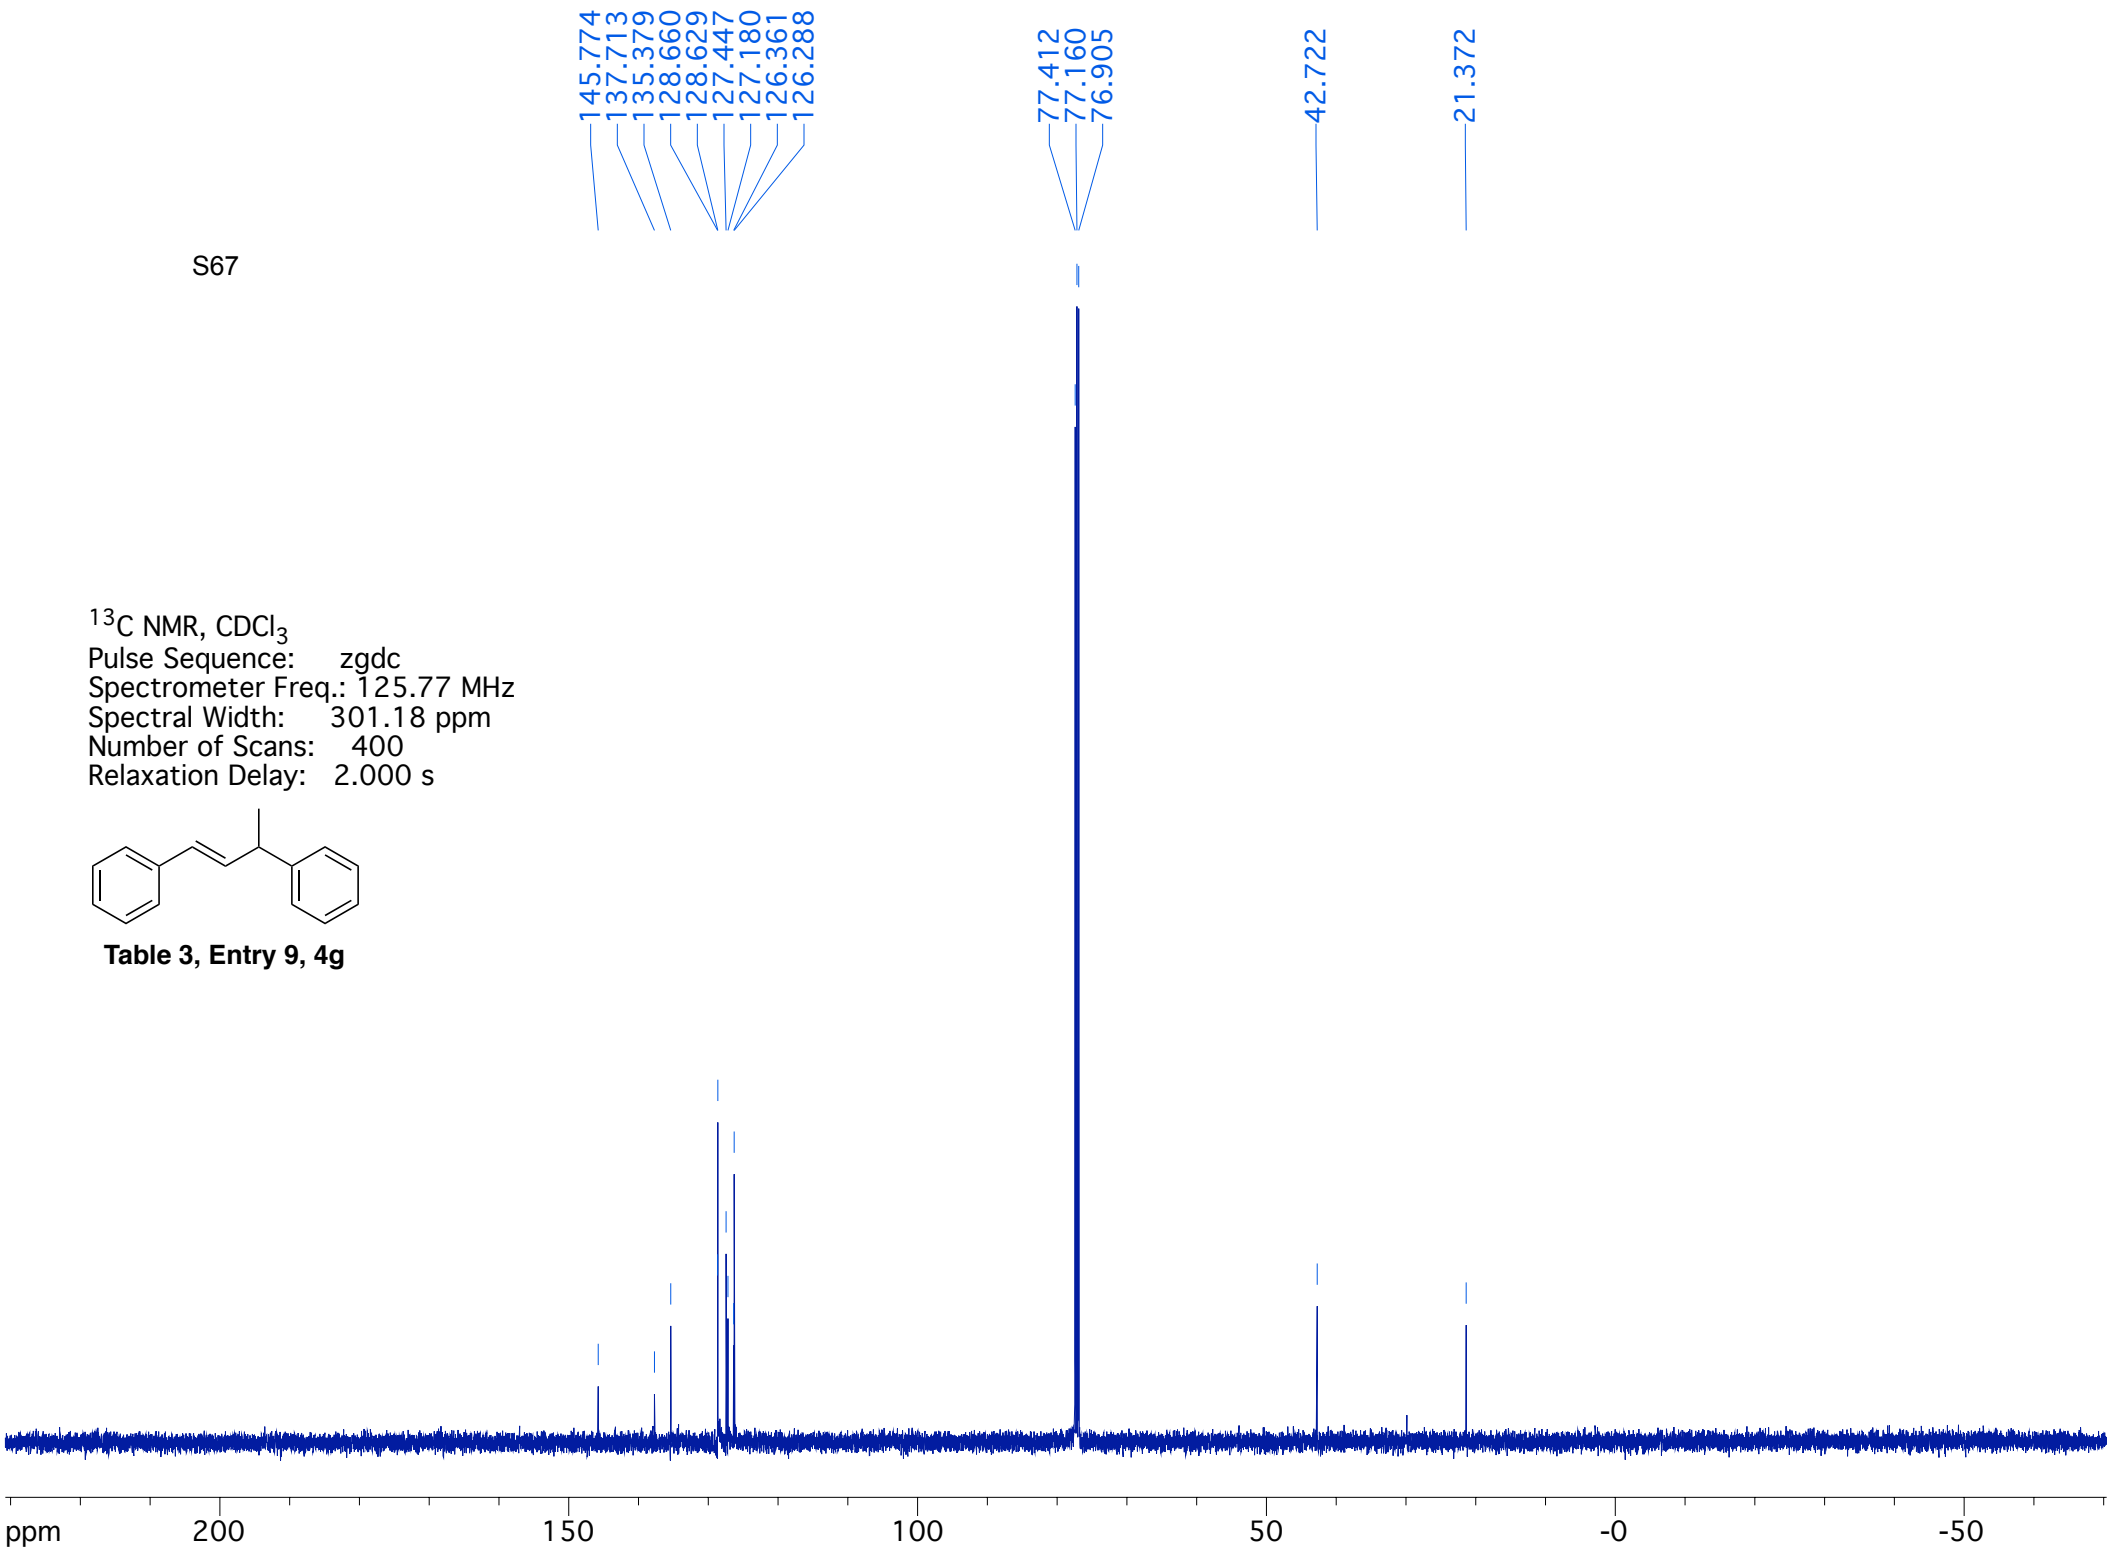

7.380  
7.376  
7.358  
7.357  
7.327  
7.322  
7.309  
7.306  
7.289  
7.260  
7.227  
7.223  
7.220  
7.210  
7.205  
7.200  
7.190  
7.187  
7.184  
6.407  
6.368  
6.269  
6.251  
6.233  
6.212  
6.194  
2.272  
2.269  
2.265  
2.257  
2.254  
2.251  
2.237  
2.235  
2.220  
2.217  
2.205  
2.202  
2.185  
2.183  
2.180  
2.177  
2.098  
2.095  
2.080  
2.077  
2.070  
2.061  
2.058  
2.051  
2.045  
2.042  
2.037  
2.034  
2.027  
2.024  
2.021  
1.621  
1.605  
1.603  
1.590  
1.577  
1.560  
1.522  
1.374  
1.344  
1.328  
1.311  
1.301  
1.298  
1.288  
1.282  
1.202  
1.200  
1.179  
1.179  
1.165  
1.161  
1.141  
0.946  
0.929  
0.923  
0.913  
0.896

S68

<sup>1</sup>H NMR, CDCl<sub>3</sub>  
Pulse Sequence: zg  
Spectrometer Freq.: 400.13 MHz  
Spectral Width: 20.42 ppm  
Number of Scans: 1  
Relaxation Delay: 1.000 s

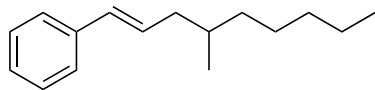

Table 4, Entry 15, 5a

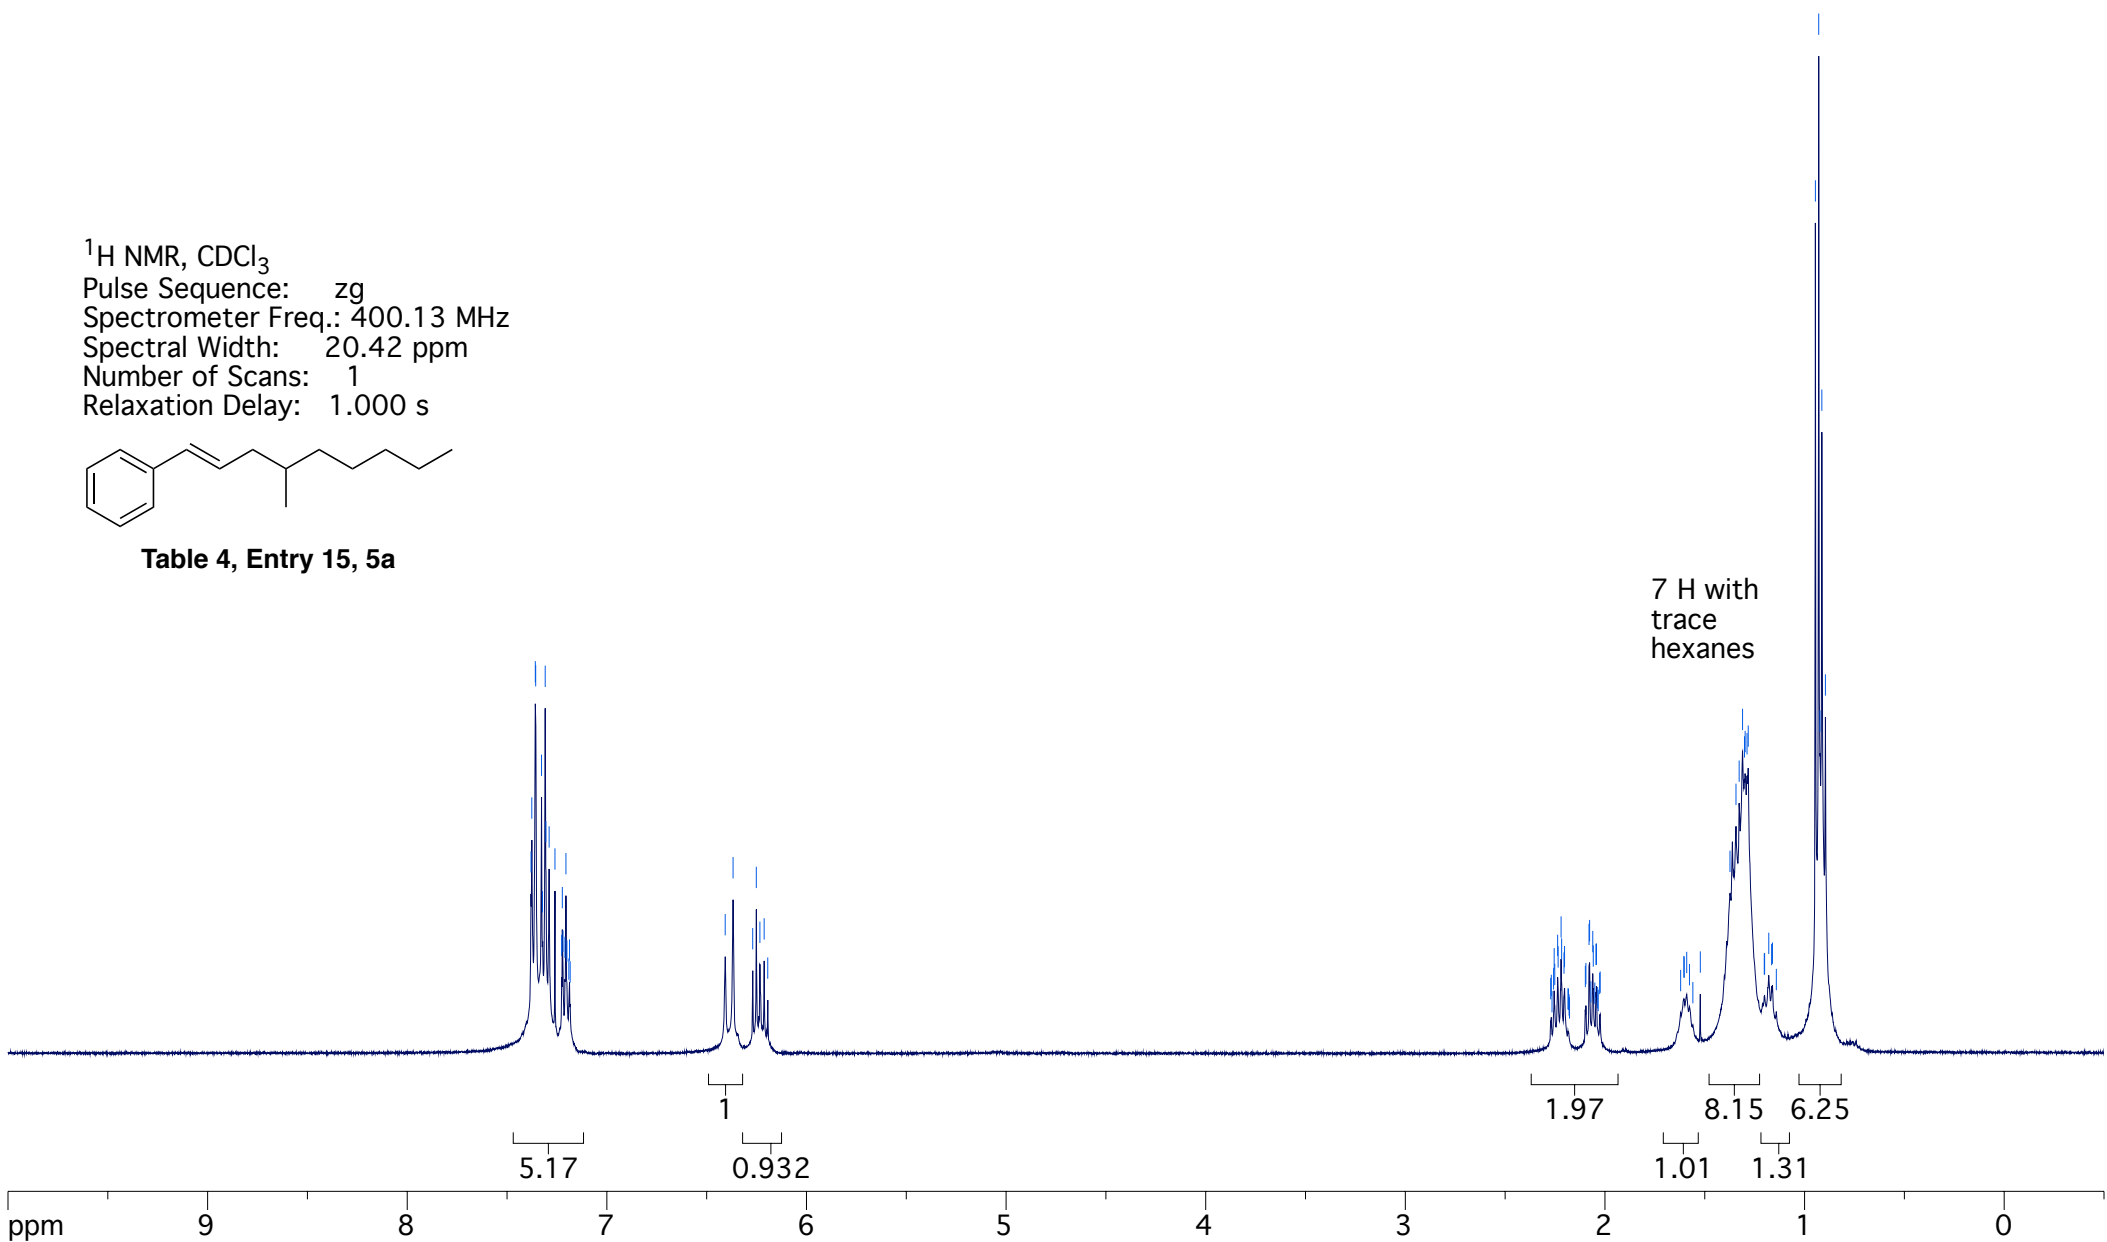

S69

$^{13}\text{C}$  NMR,  $\text{CDCl}_3$   
Pulse Sequence: zgdc  
Spectrometer Freq.: 100.62 MHz  
Spectral Width: 301.16 ppm  
Number of Scans: 84  
Relaxation Delay: 2.000 s

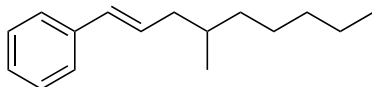

Table 4, Entry 15, 5a

138.130  
130.979  
129.990  
128.608  
126.881  
126.070

77.483  
77.160  
76.845

40.755  
36.811  
33.497  
32.326  
26.964  
22.878  
19.790  
14.276

ppm

200

150

100

50

-0

-50

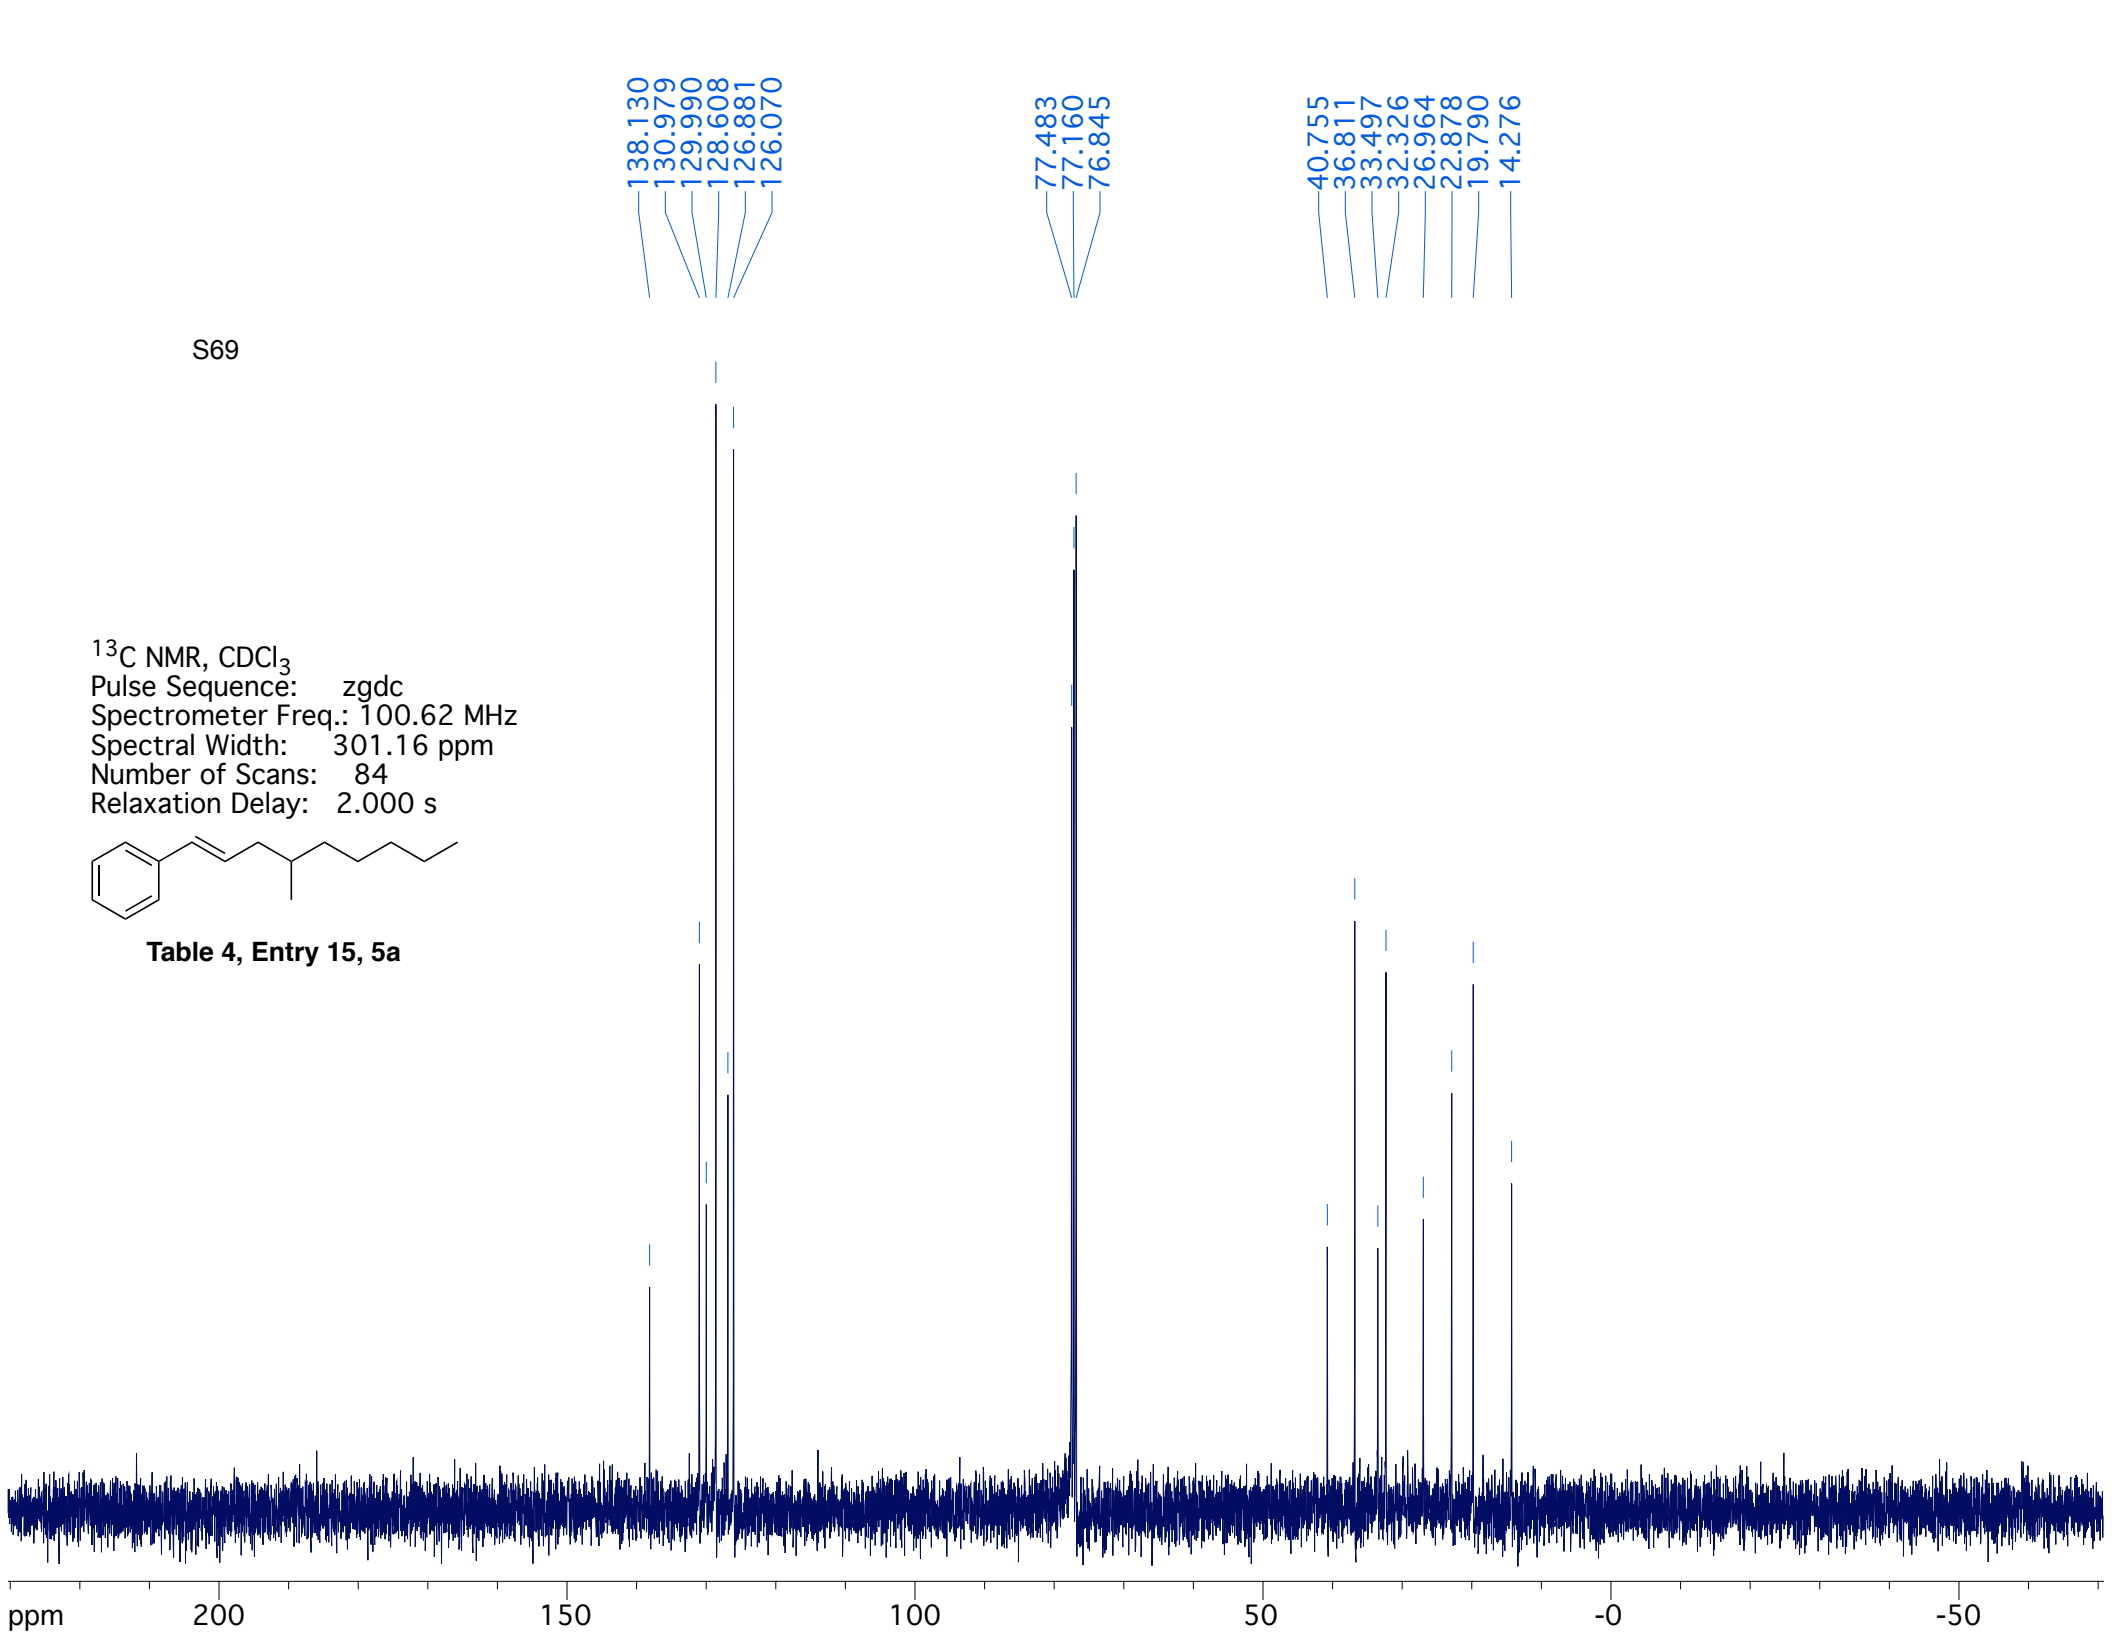



7.388  
7.384  
7.367  
7.335  
7.330  
7.317  
7.297  
7.260  
7.234  
7.231  
7.228  
7.218  
7.213  
7.195  
6.408  
6.369  
6.292  
6.274  
6.256  
6.235  
6.216  
6.156  
2.154  
2.138  
2.121  
2.119  
1.816  
1.811  
1.799  
1.774  
1.769  
1.761  
1.752  
1.736  
1.729  
1.710  
1.708  
1.704  
1.700  
1.677  
1.485  
1.477  
1.469  
1.460  
1.450  
1.441  
1.432  
1.424  
1.414  
1.404  
1.396  
1.388  
1.379  
1.323  
1.300  
1.292  
1.286  
1.285  
1.269  
1.262  
1.255  
1.238  
1.212  
1.205  
1.197  
1.174  
1.151  
1.143  
1.039  
1.032  
1.025  
1.007  
1.002  
0.979  
0.972  
0.948  
0.943

S70

<sup>1</sup>H NMR, CDCl<sub>3</sub>  
Pulse Sequence: zg  
Spectrometer Freq.: 400.13 MHz  
Spectral Width: 20.42 ppm  
Number of Scans: 1  
Relaxation Delay: 1.000 s

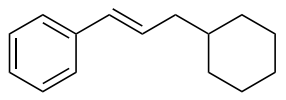

Table 4, Entry 2, 5b

3 H with trace hexanes

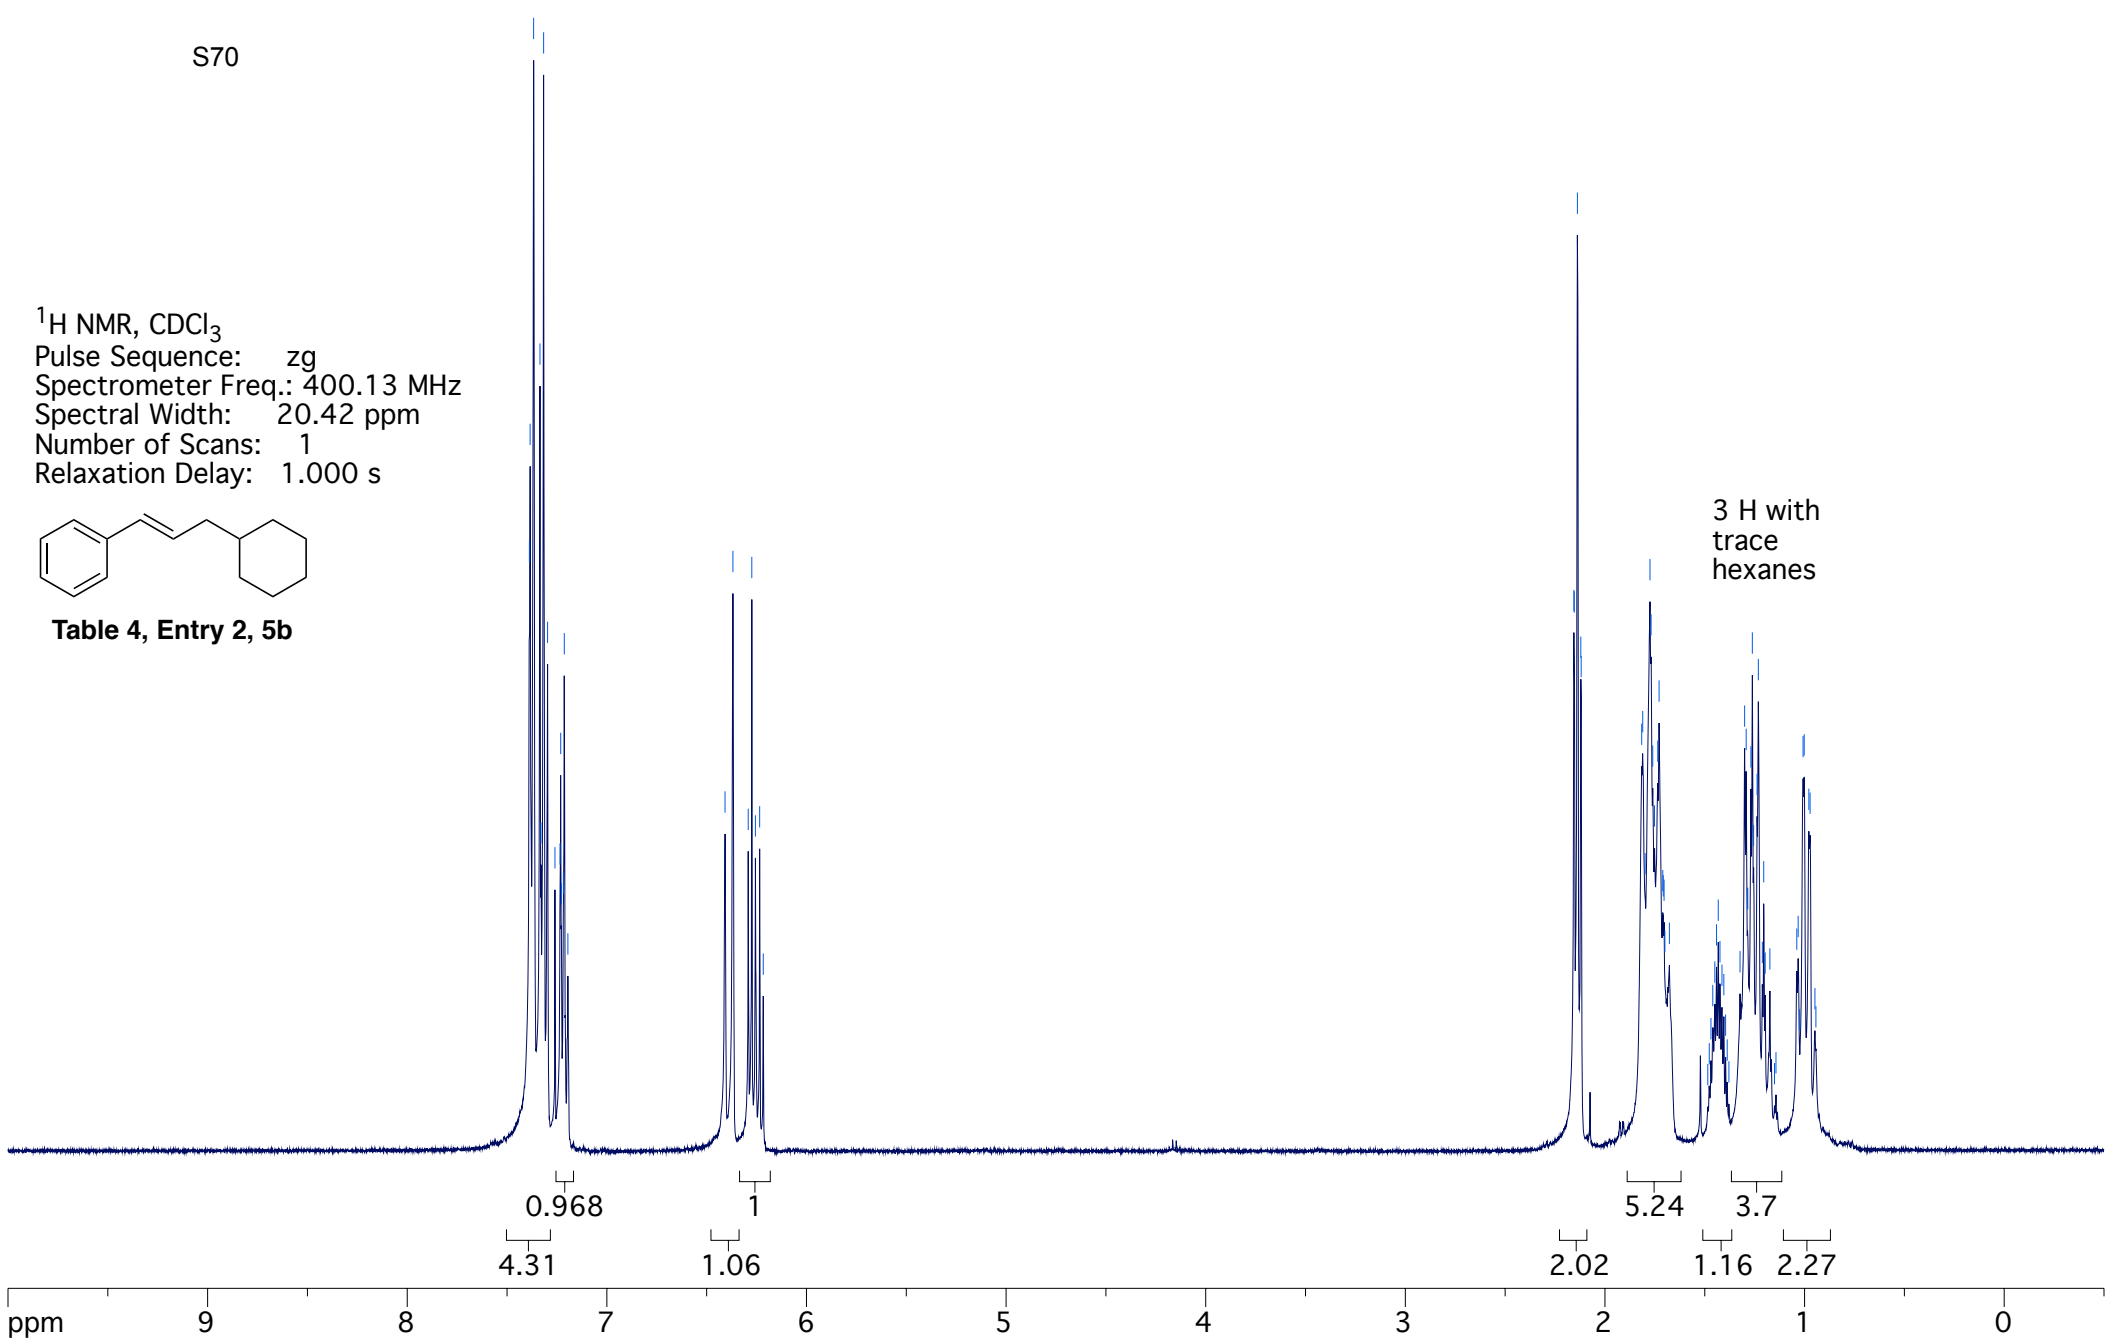

S71

$^{13}\text{C}$  NMR,  $\text{CDCl}_3$   
Pulse Sequence: zgdc  
Spectrometer Freq.: 100.62 MHz  
Spectral Width: 301.16 ppm  
Number of Scans: 98  
Relaxation Delay: 2.000 s

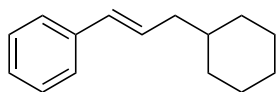

Table 4, Entry 2, 5b

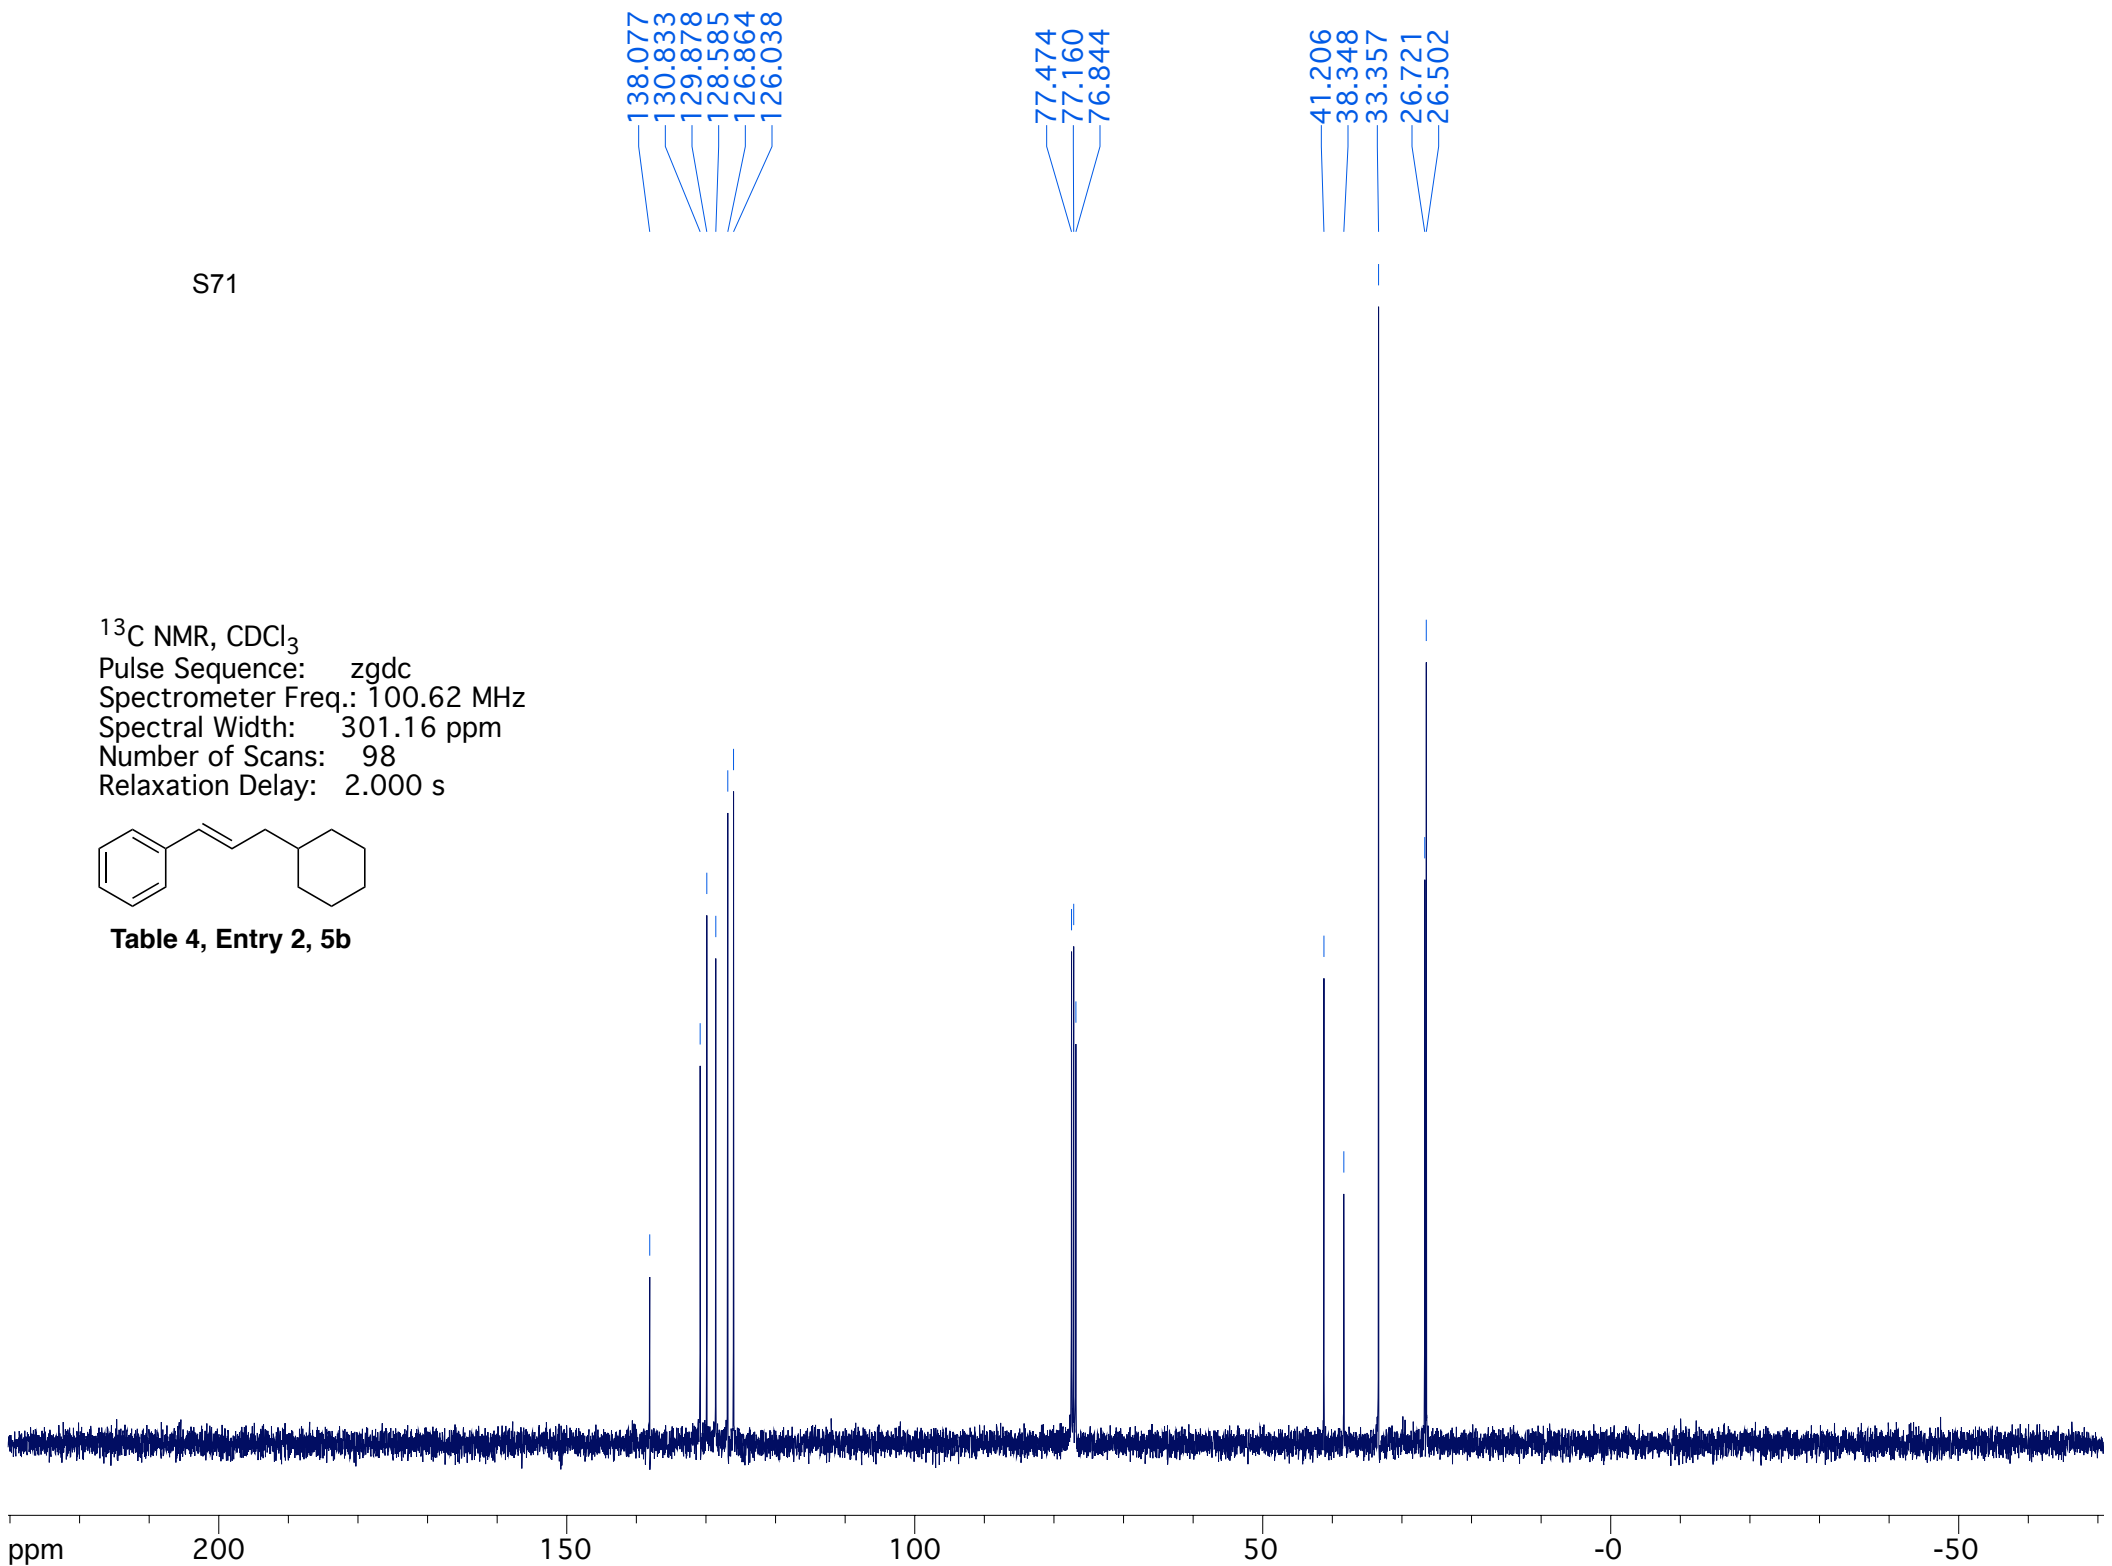

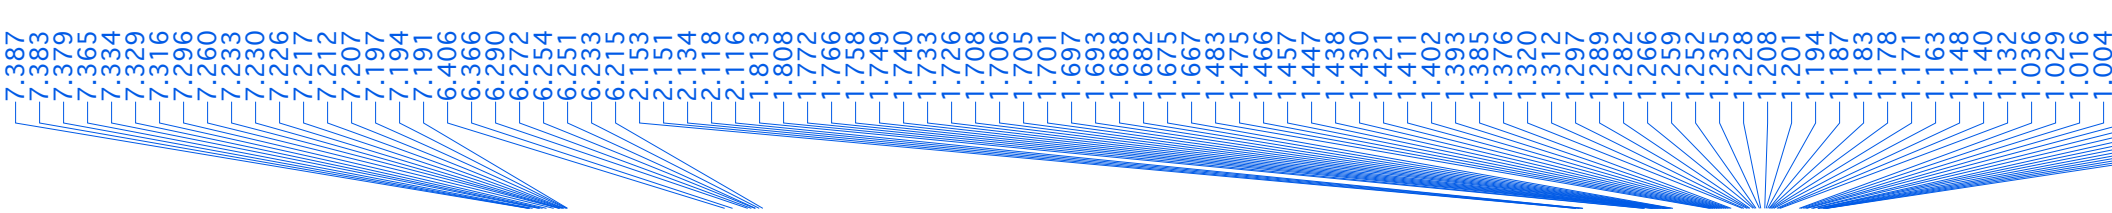

S72

<sup>1</sup>H NMR, CDCl<sub>3</sub>  
Pulse Sequence: zg  
Spectrometer Freq.: 400.13 MHz  
Spectral Width: 20.42 ppm  
Number of Scans: 1  
Relaxation Delay: 1.000 s

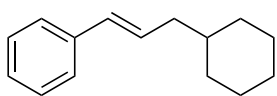

Table 4, Entry 3, 5b

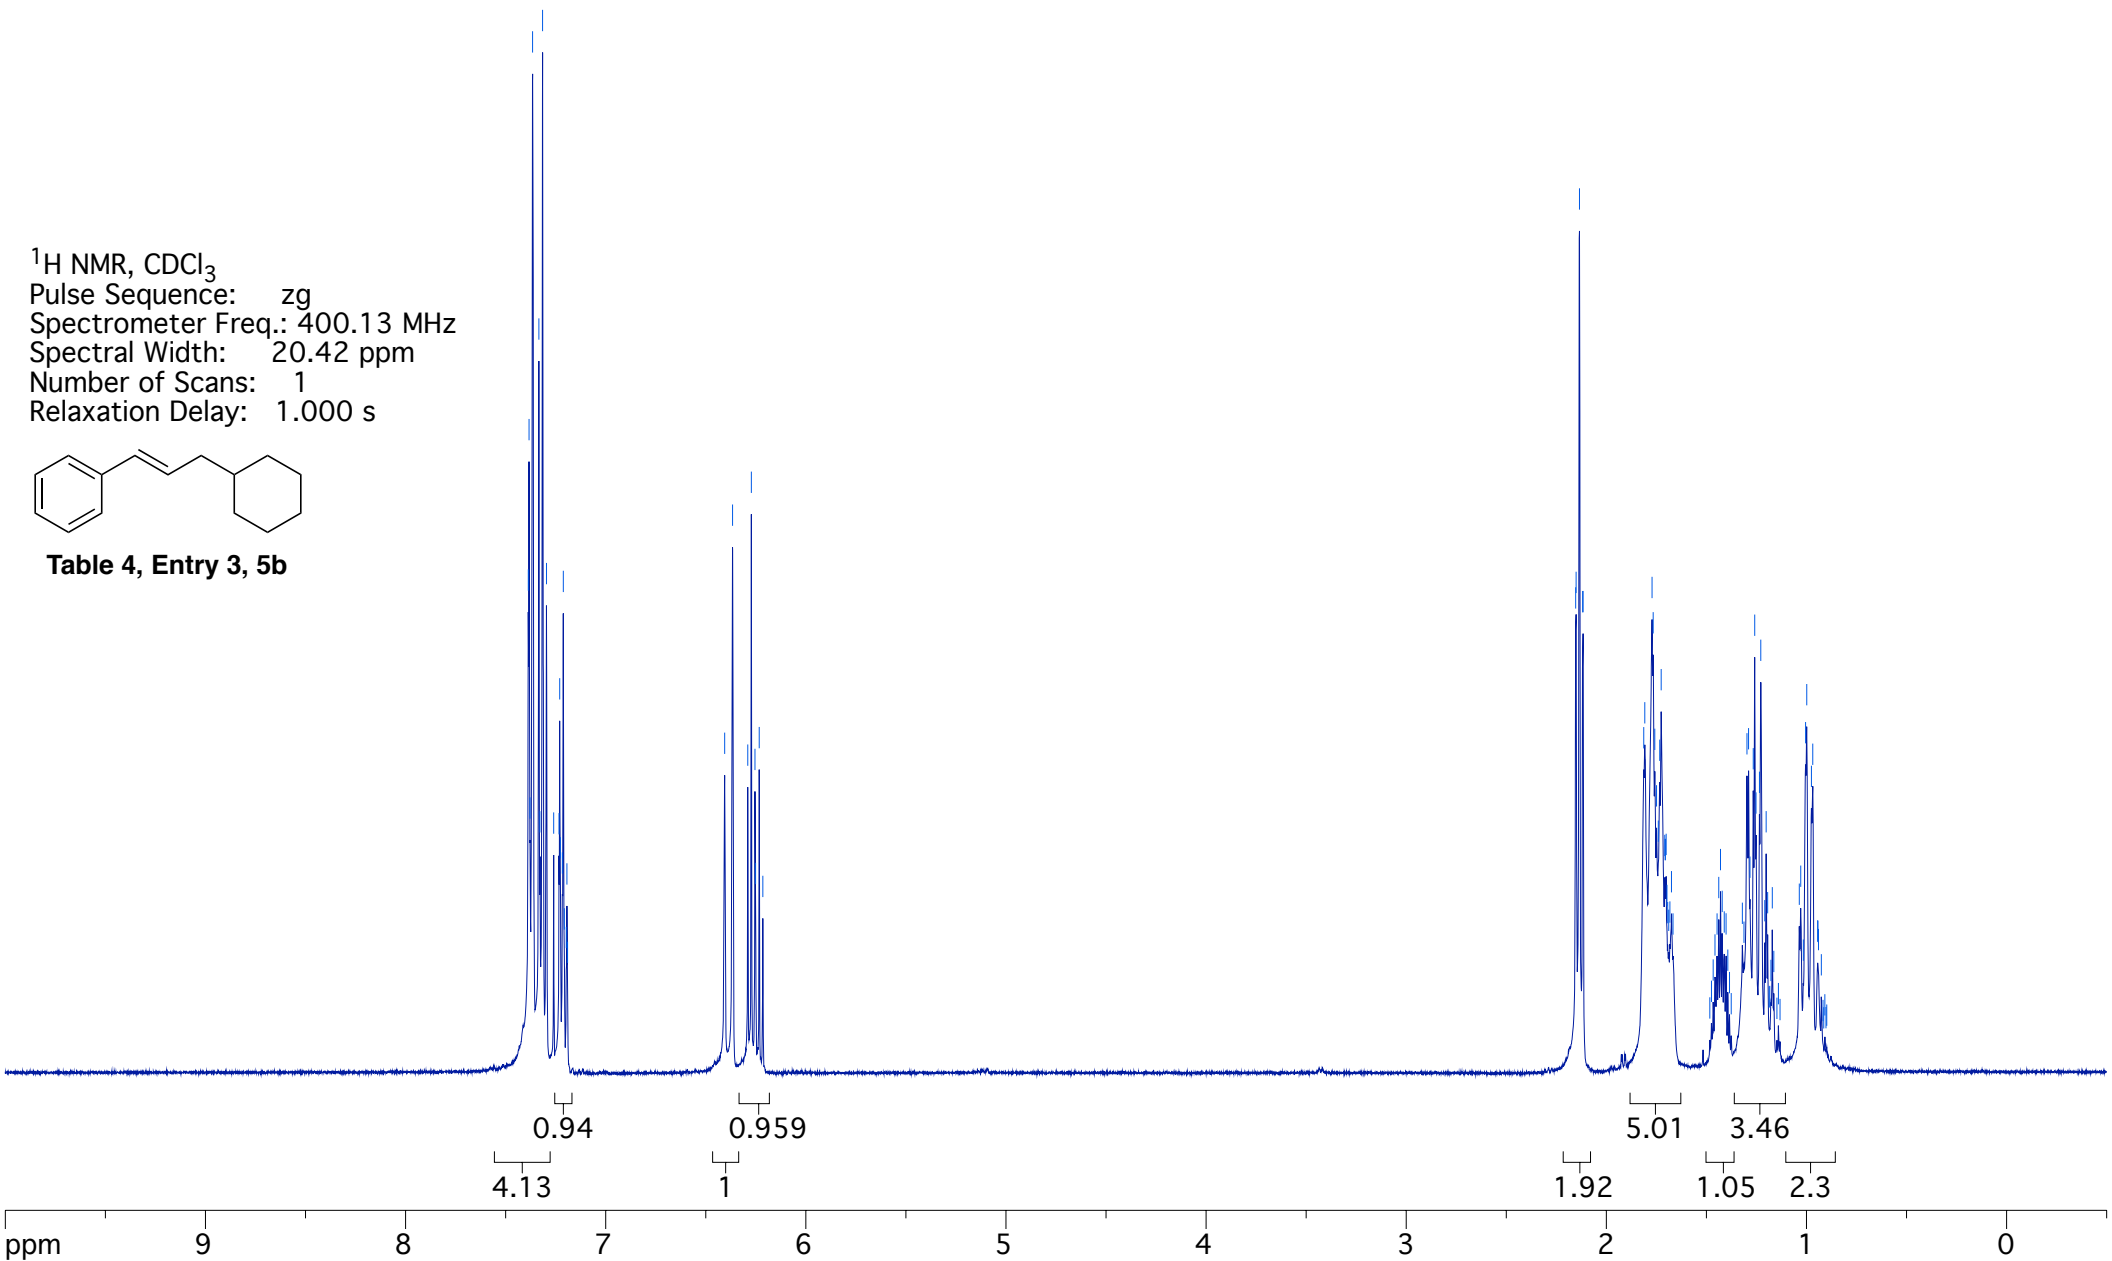

S73

$^{13}\text{C}$  NMR,  $\text{CDCl}_3$   
Pulse Sequence: zgdc  
Spectrometer Freq.: 100.62 MHz  
Spectral Width: 301.16 ppm  
Number of Scans: 66  
Relaxation Delay: 2.000 s

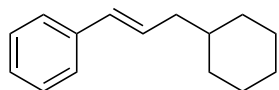

Table 4, Entry 3, 5b

138.058  
130.817  
129.880  
128.581  
126.865  
126.037  
77.474  
77.160  
76.836  
41.208  
38.340  
33.358  
26.719  
26.502

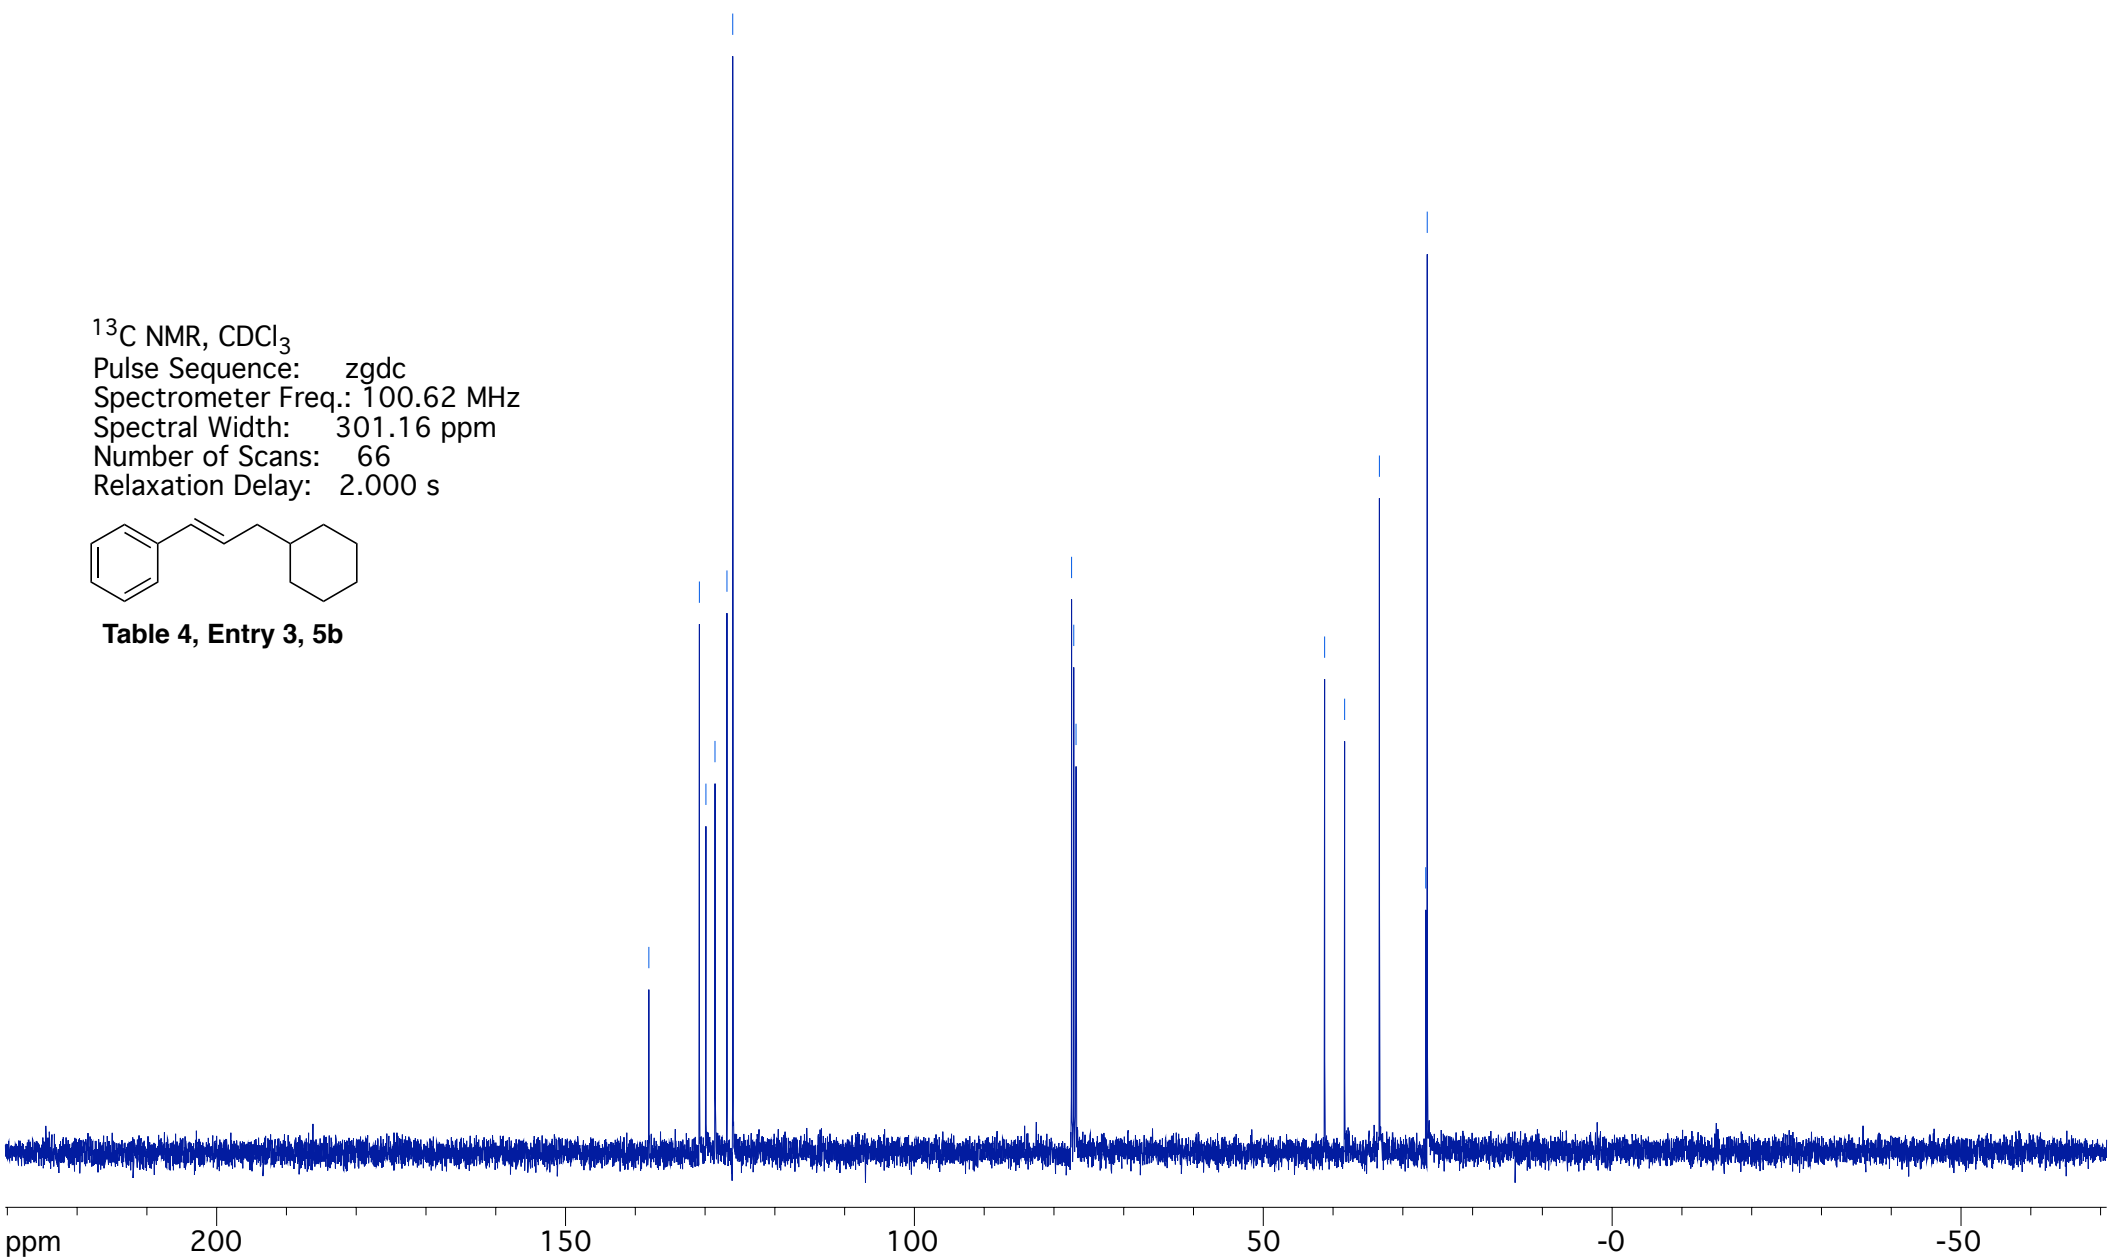

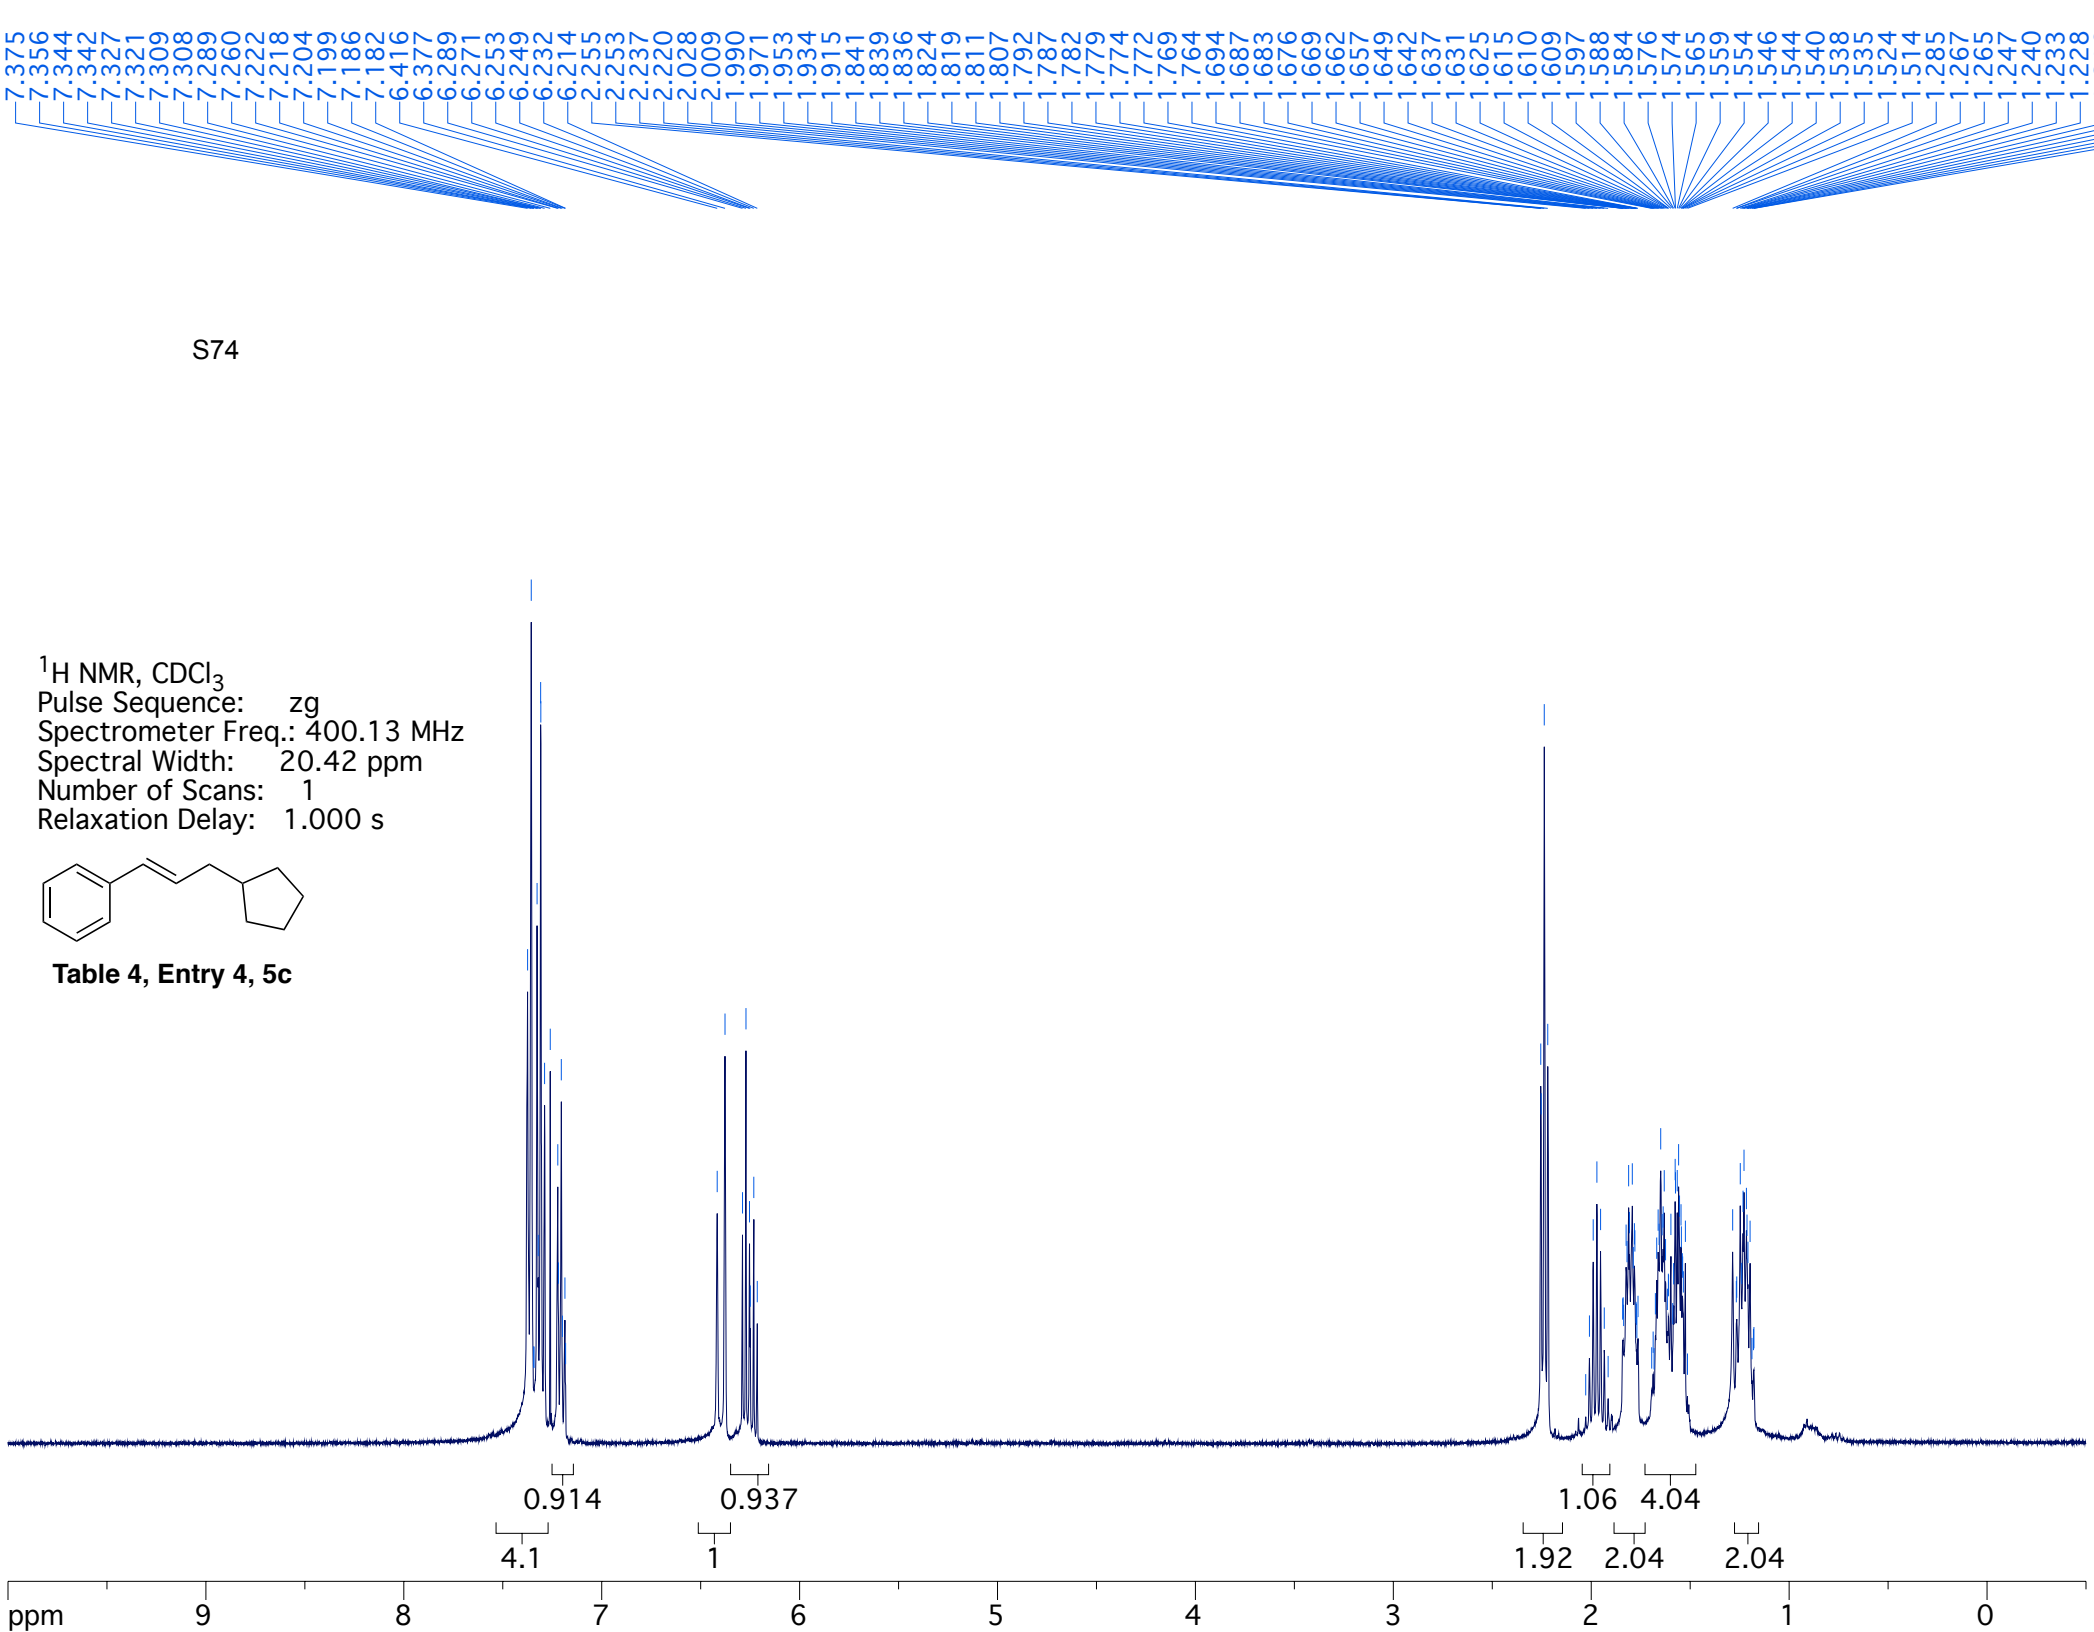

S75

138.133  
130.673  
130.265  
128.593  
126.864  
126.055

77.474  
77.160  
76.840

40.160  
39.577  
32.476  
25.327

<sup>13</sup>C NMR, CDCl<sub>3</sub>  
Pulse Sequence: zgdc  
Spectrometer Freq.: 100.62 MHz  
Spectral Width: 301.16 ppm  
Number of Scans: 75  
Relaxation Delay: 2.000 s

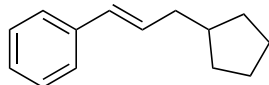

Table 4, Entry 4, 5c

ppm

200

150

100

50

-0

-50

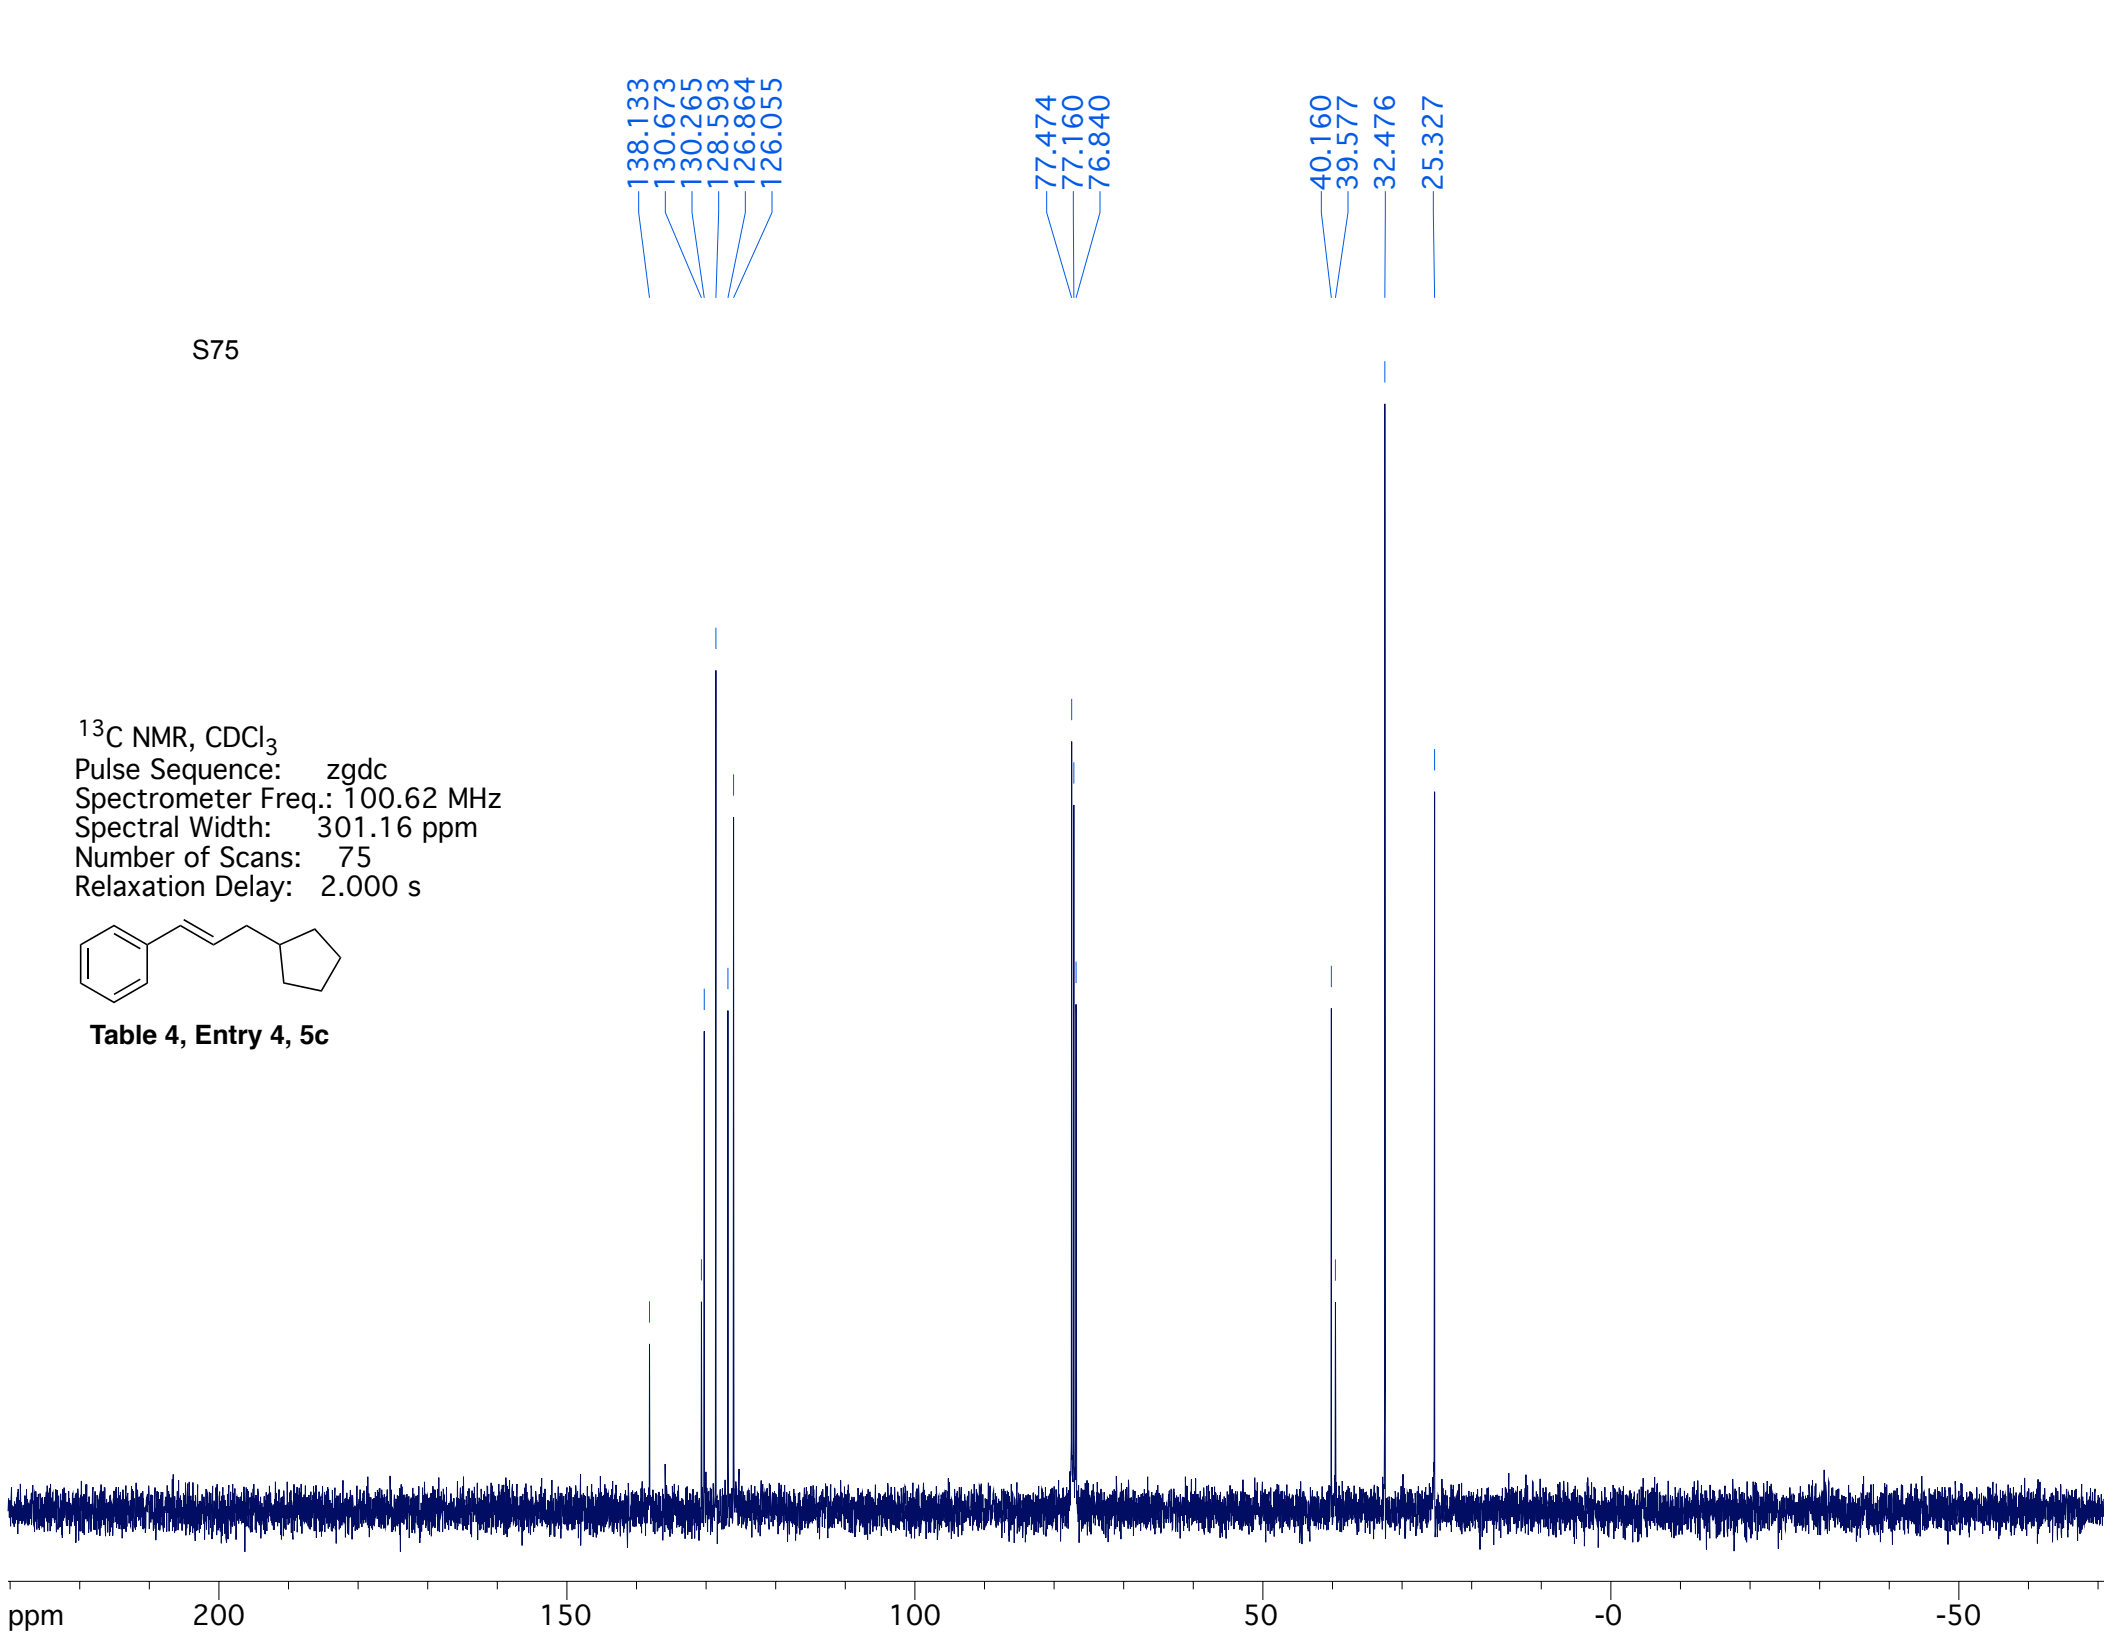

7.377  
7.374  
7.357  
7.327  
7.308  
7.289  
7.260  
7.226  
7.223  
7.220  
7.205  
7.190  
7.187  
7.184  
6.398  
6.359  
6.239  
6.222  
6.204  
6.200  
6.182  
6.165

2.242  
2.219  
2.216  
2.200  
2.183  
2.164  
2.146  
2.143  
2.072  
2.069  
2.059  
2.041  
2.038  
2.023  
2.005  
2.002

S76

<sup>1</sup>H NMR, CDCl<sub>3</sub>  
Pulse Sequence: zg  
Spectrometer Freq.: 400.13 MHz  
Spectral Width: 20.42 ppm  
Number of Scans: 1  
Relaxation Delay: 1.000 s

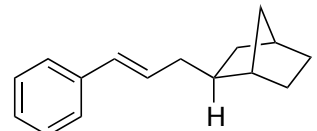

Table 4, Entry 5, 5d

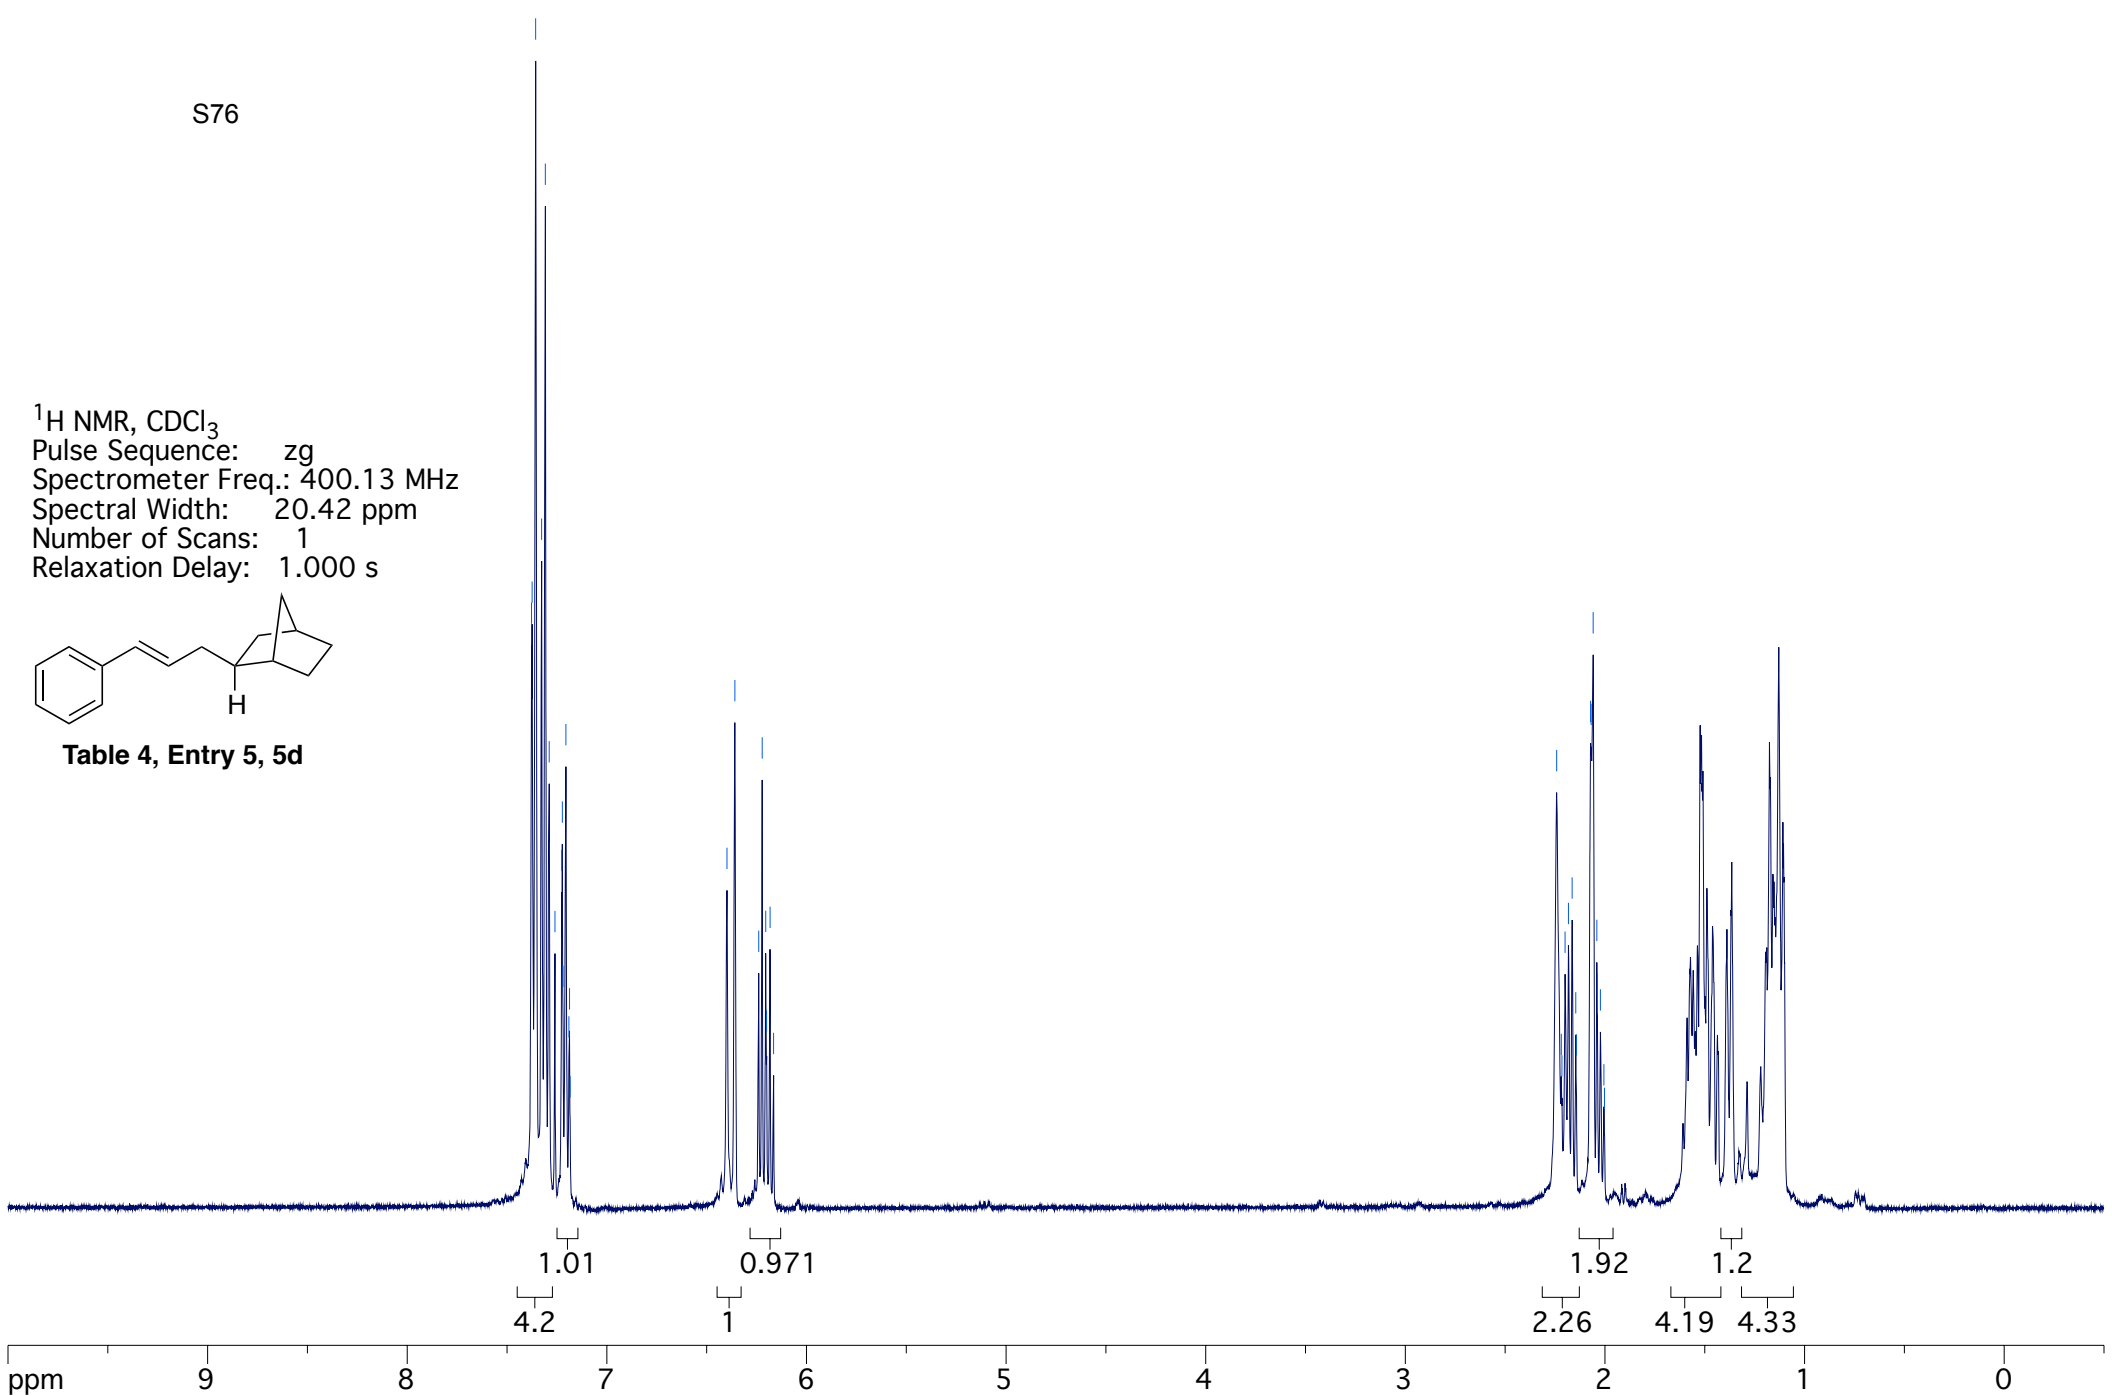

S77

$^{13}\text{C}$  NMR,  $\text{CDCl}_3$   
Pulse Sequence: zgdc  
Spectrometer Freq.: 100.62 MHz  
Spectral Width: 301.16 ppm  
Number of Scans: 148  
Relaxation Delay: 2.000 s

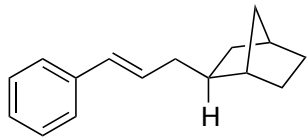

Table 4, Entry 5, 5d

138.095  
130.413  
130.264  
128.591  
126.881  
126.054

77.474  
77.160  
76.846

42.180  
40.856  
40.396  
38.013  
36.868  
35.342  
30.195  
29.001

ppm

200

150

100

50

-0

-50

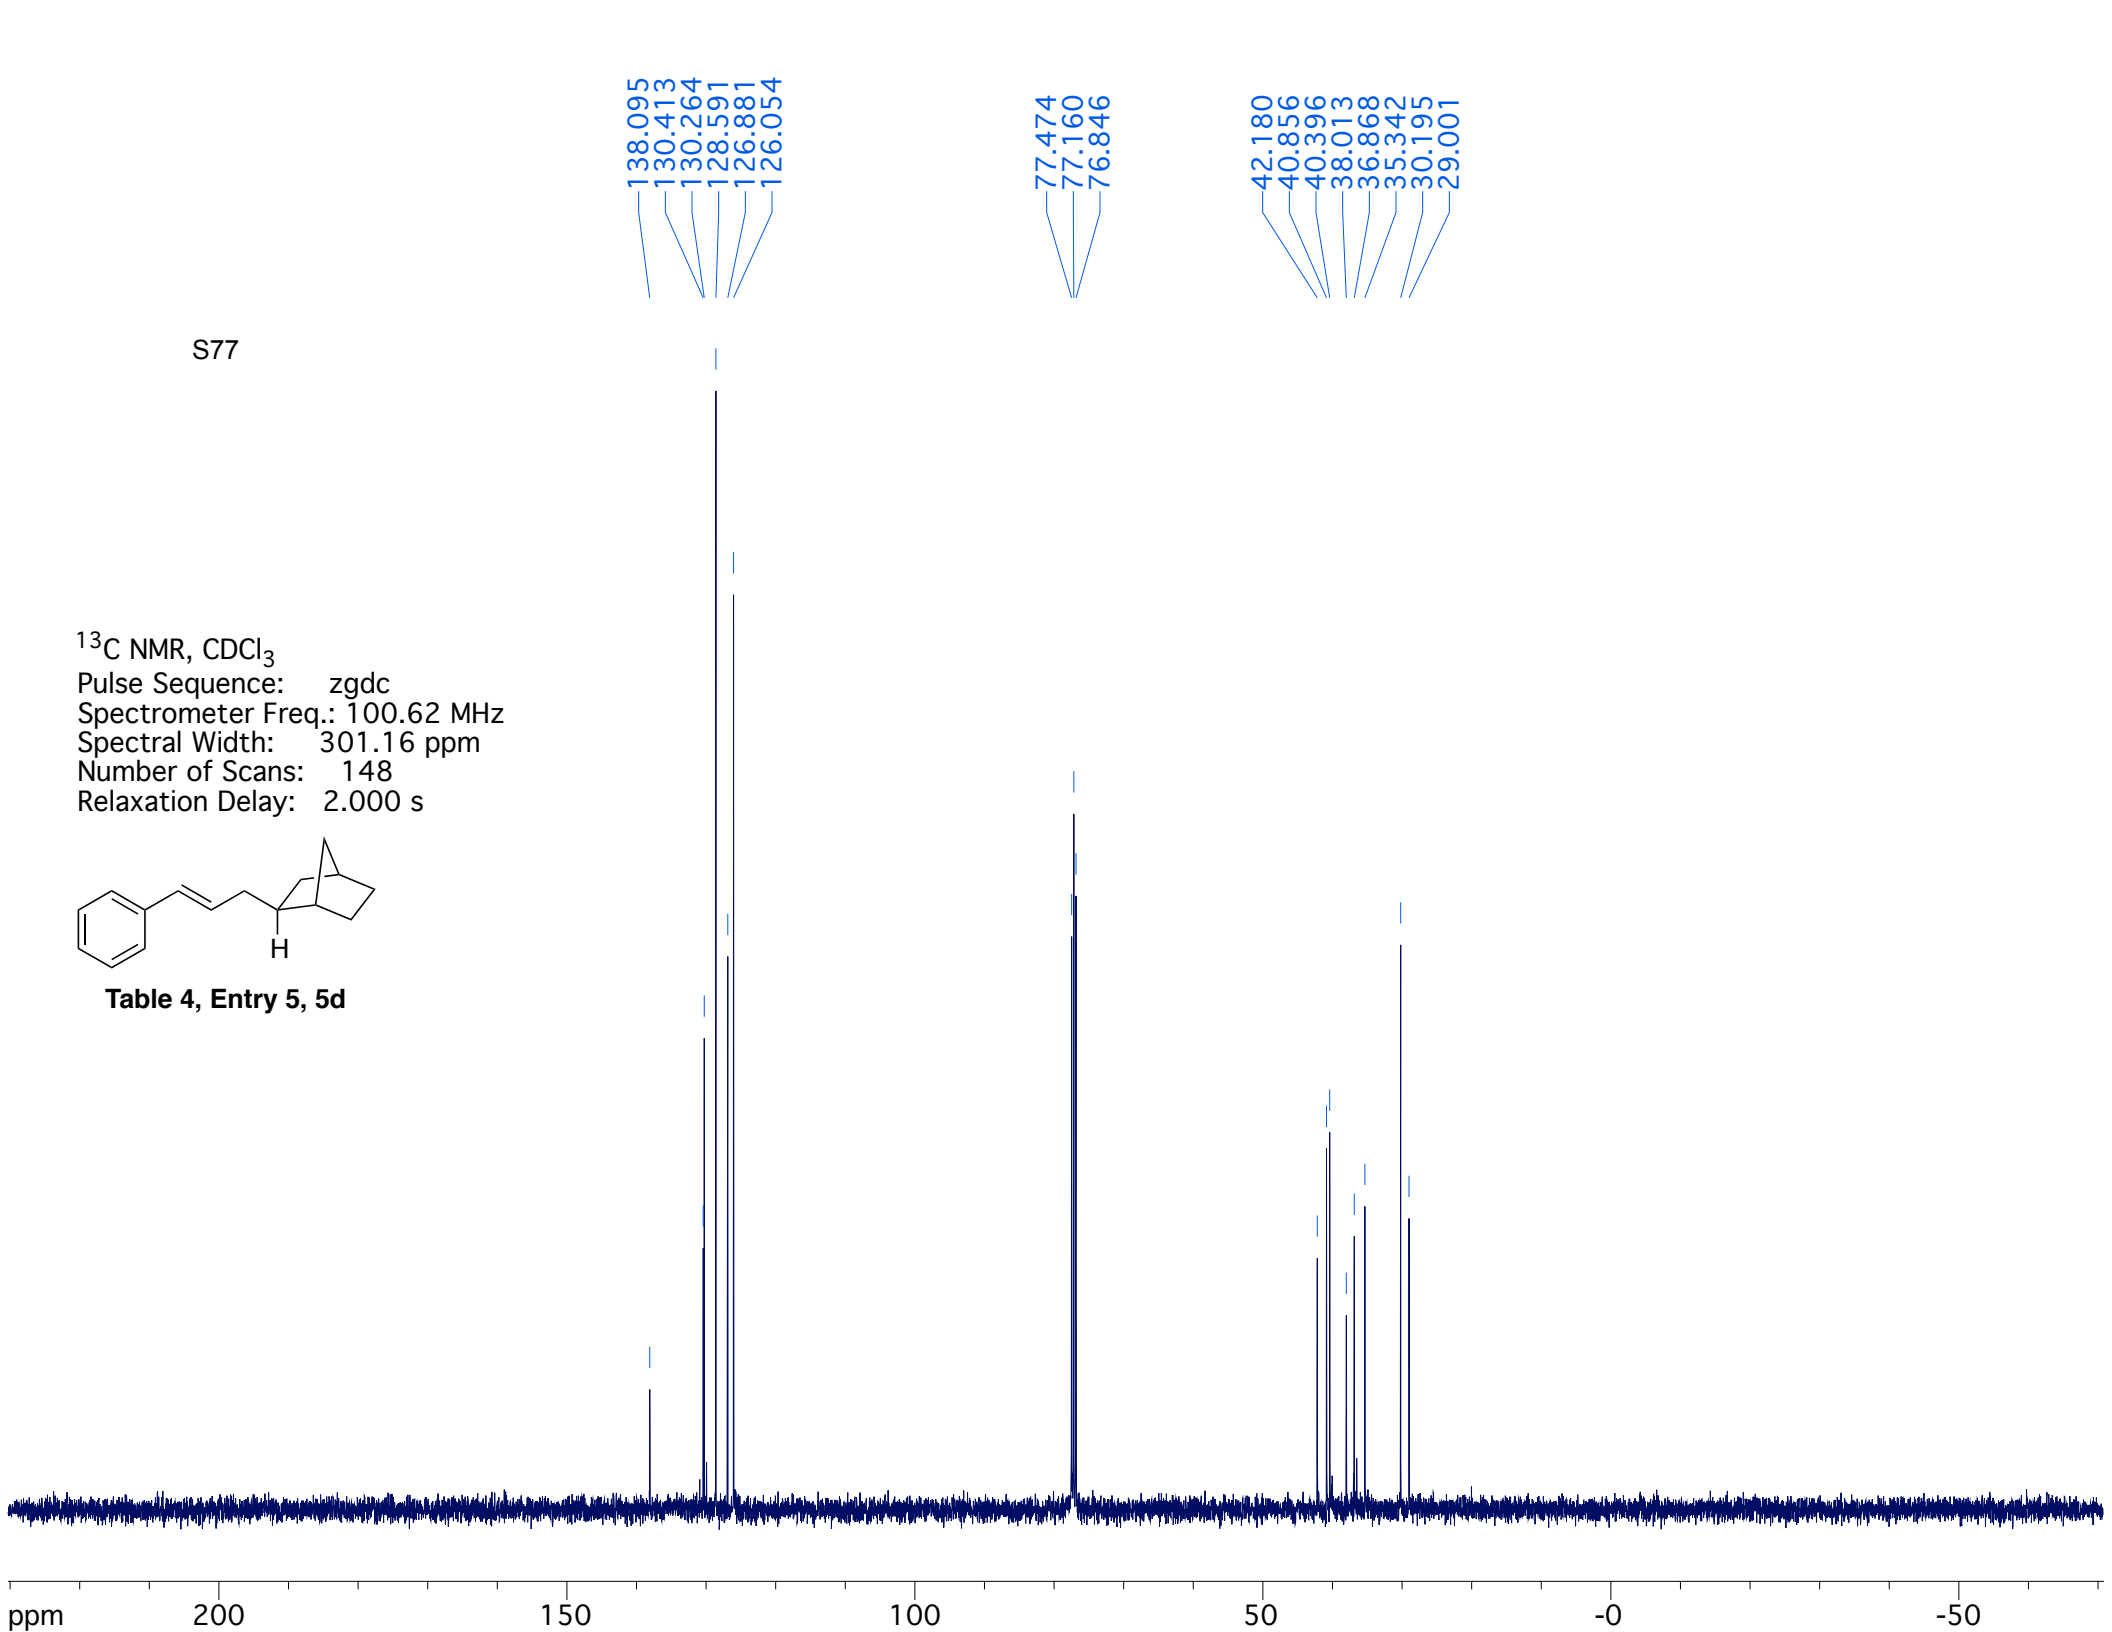



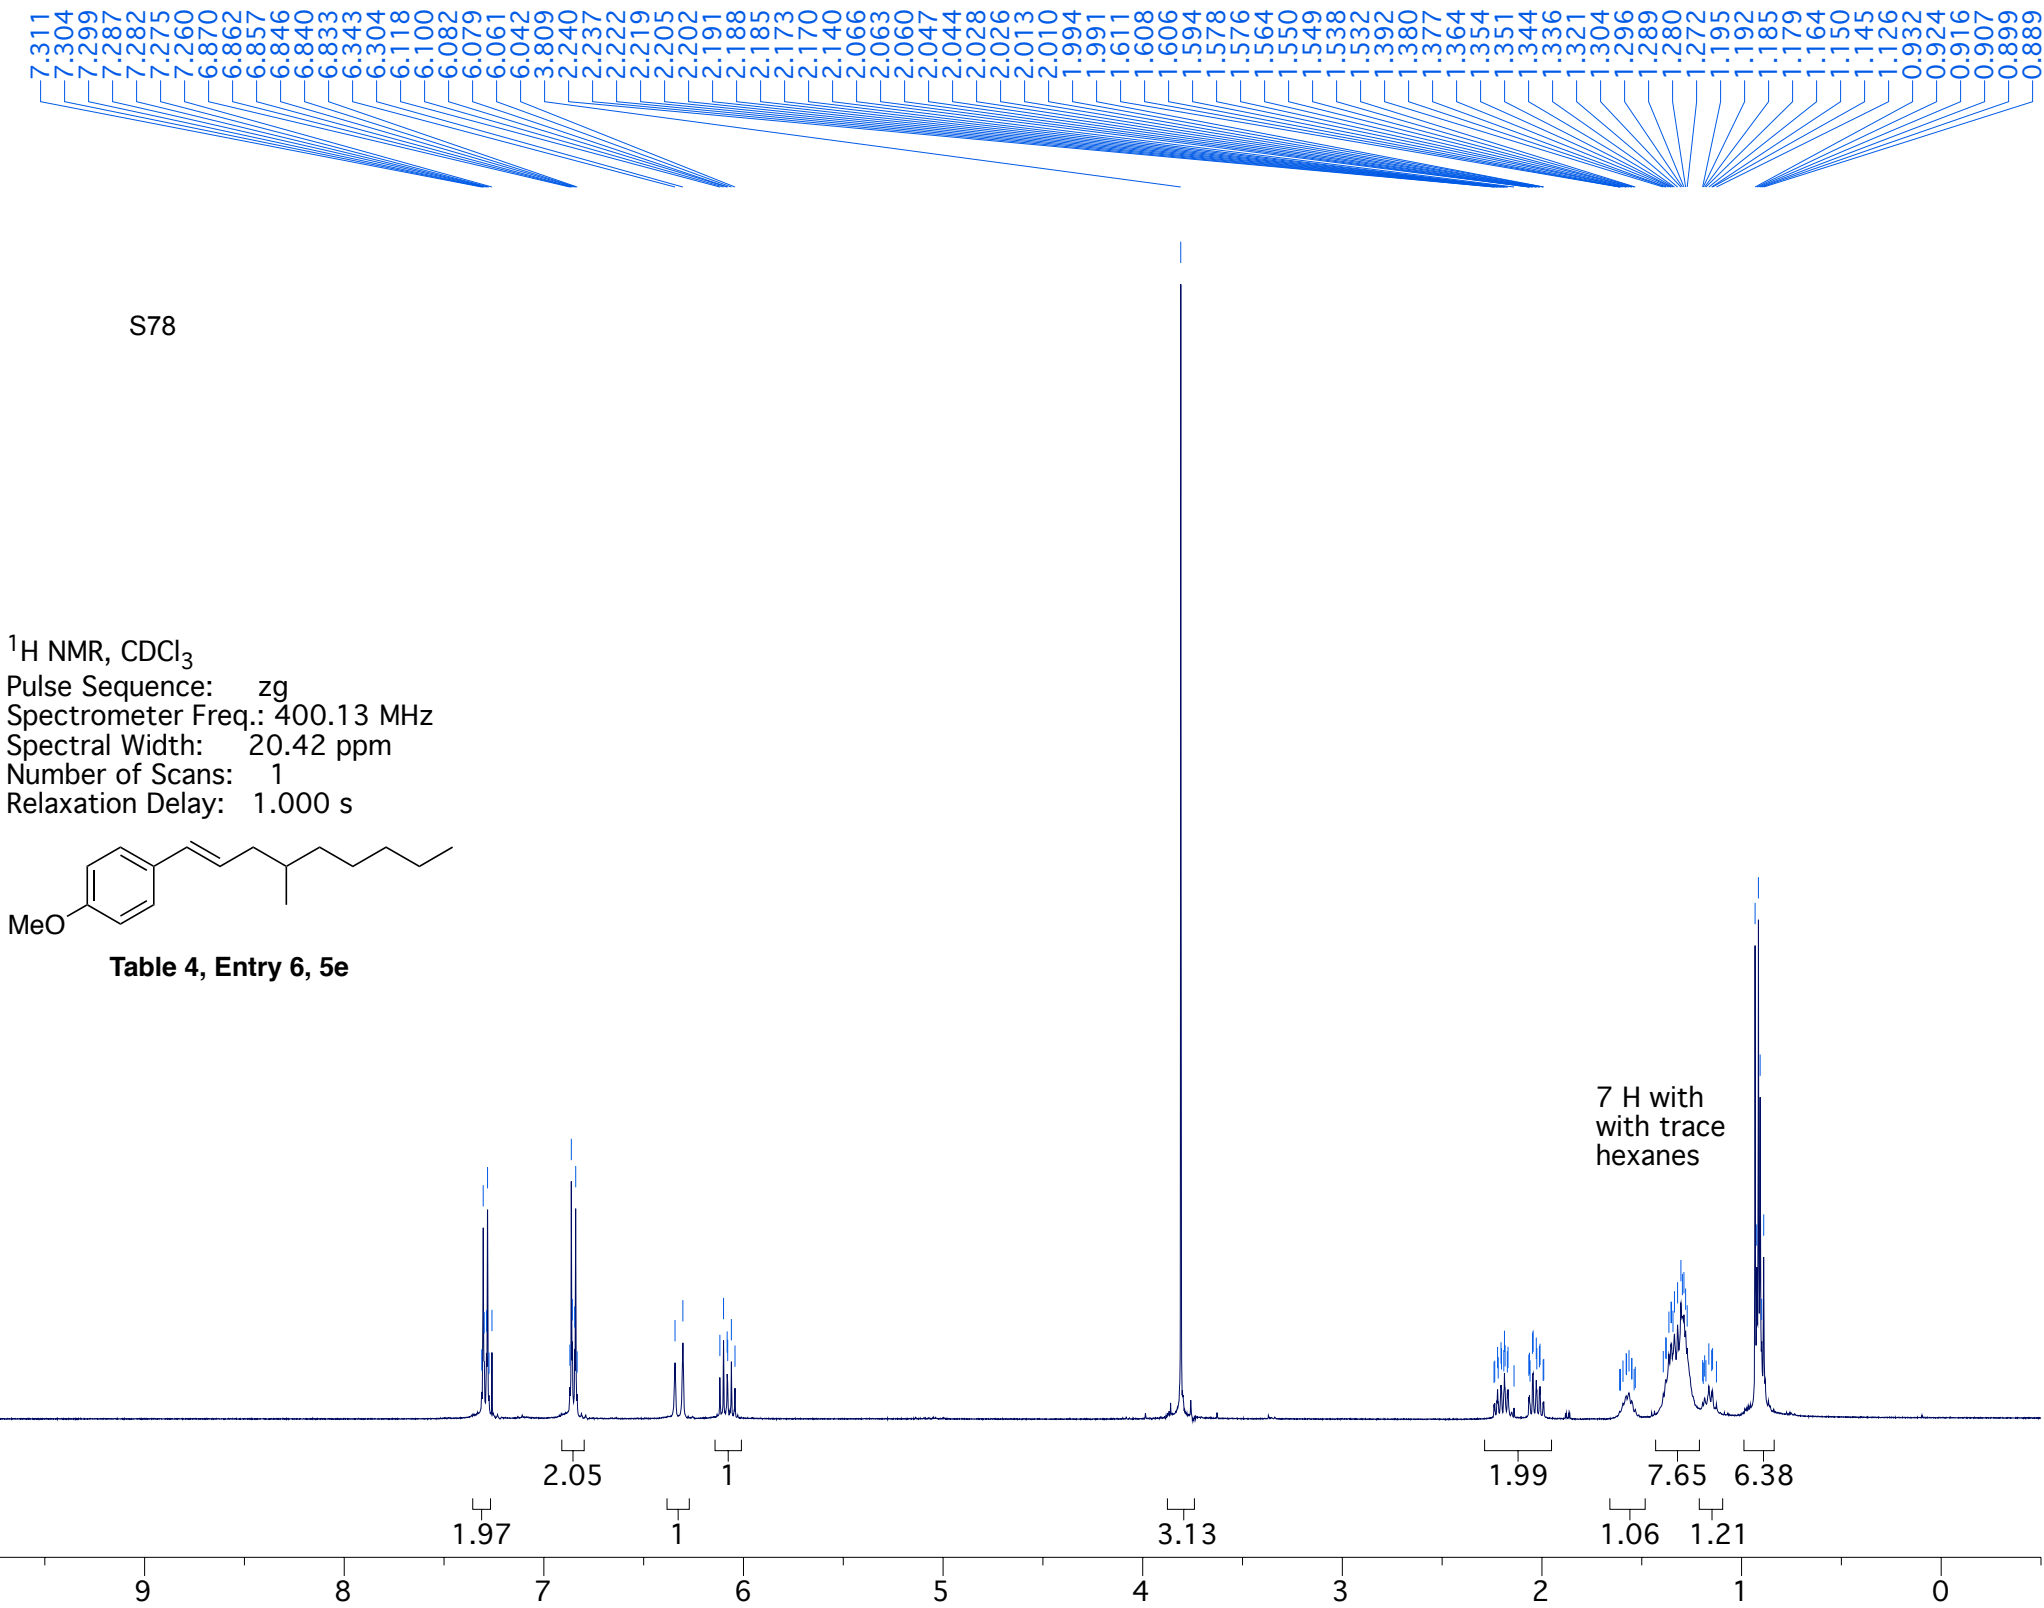

S79

$^{13}\text{C}$  NMR,  $\text{CDCl}_3$   
Pulse Sequence: zgdc  
Spectrometer Freq.: 100.62 MHz  
Spectral Width: 301.16 ppm  
Number of Scans: 159  
Relaxation Delay: 2.000 s

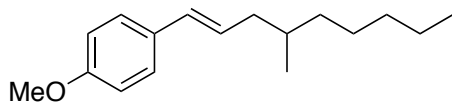

Table 4, Entry 6, 5e

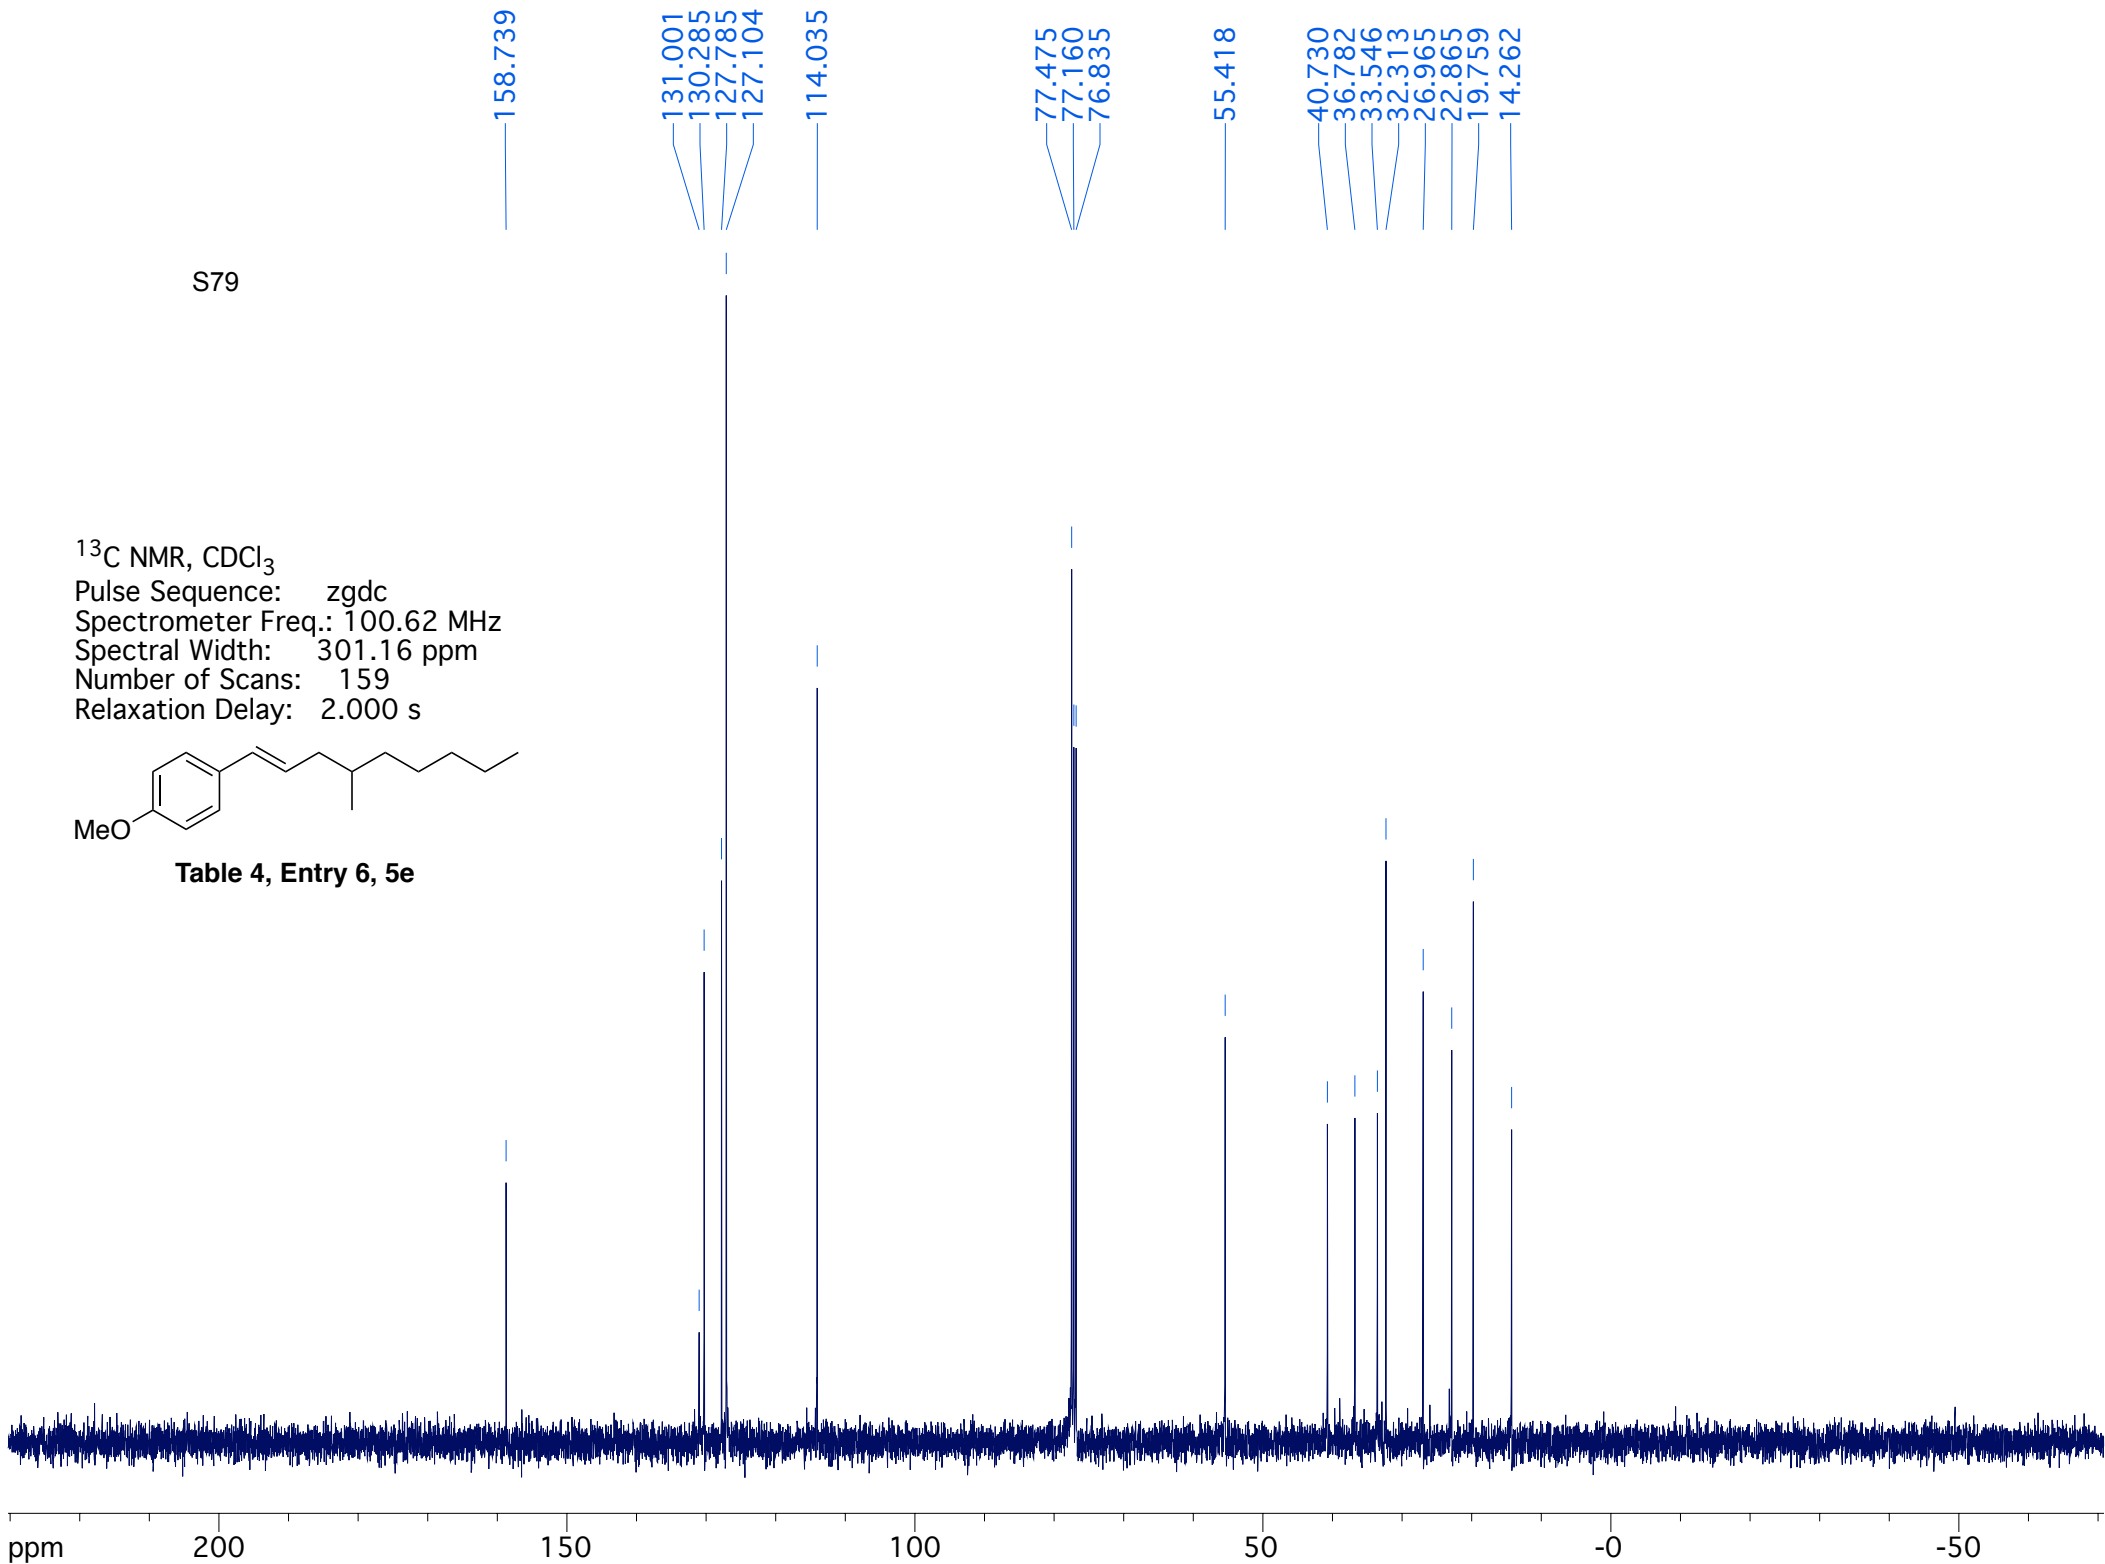

7.551  
7.530  
7.440  
7.420  
7.260  
6.422  
6.382  
6.356  
6.340  
6.322  
6.300  
6.283  
2.281  
2.266  
2.265  
2.248  
2.231  
2.216  
2.106  
2.088  
2.070  
2.051  
2.035  
2.035  
1.645  
1.643  
1.642  
1.626  
1.610  
1.597  
1.582  
1.581  
1.571  
1.565  
1.563  
1.561  
1.560  
1.558  
1.545  
1.375  
1.366  
1.364  
1.358  
1.345  
1.340  
1.327  
1.311  
1.295  
1.284  
1.276  
1.265  
1.252  
1.249  
1.247  
1.191  
1.190  
1.186  
1.174  
1.166  
1.163  
1.155  
1.135  
0.934  
0.917  
0.905  
0.897  
0.879

S80

<sup>1</sup>H NMR, CDCl<sub>3</sub>  
Pulse Sequence: zg  
Spectrometer Freq.: 400.13 MHz  
Spectral Width: 20.42 ppm  
Number of Scans: 1  
Relaxation Delay: 1.000 s

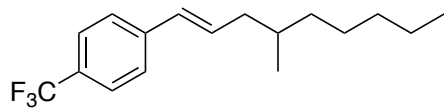

Table 4, Entry 7, 5f

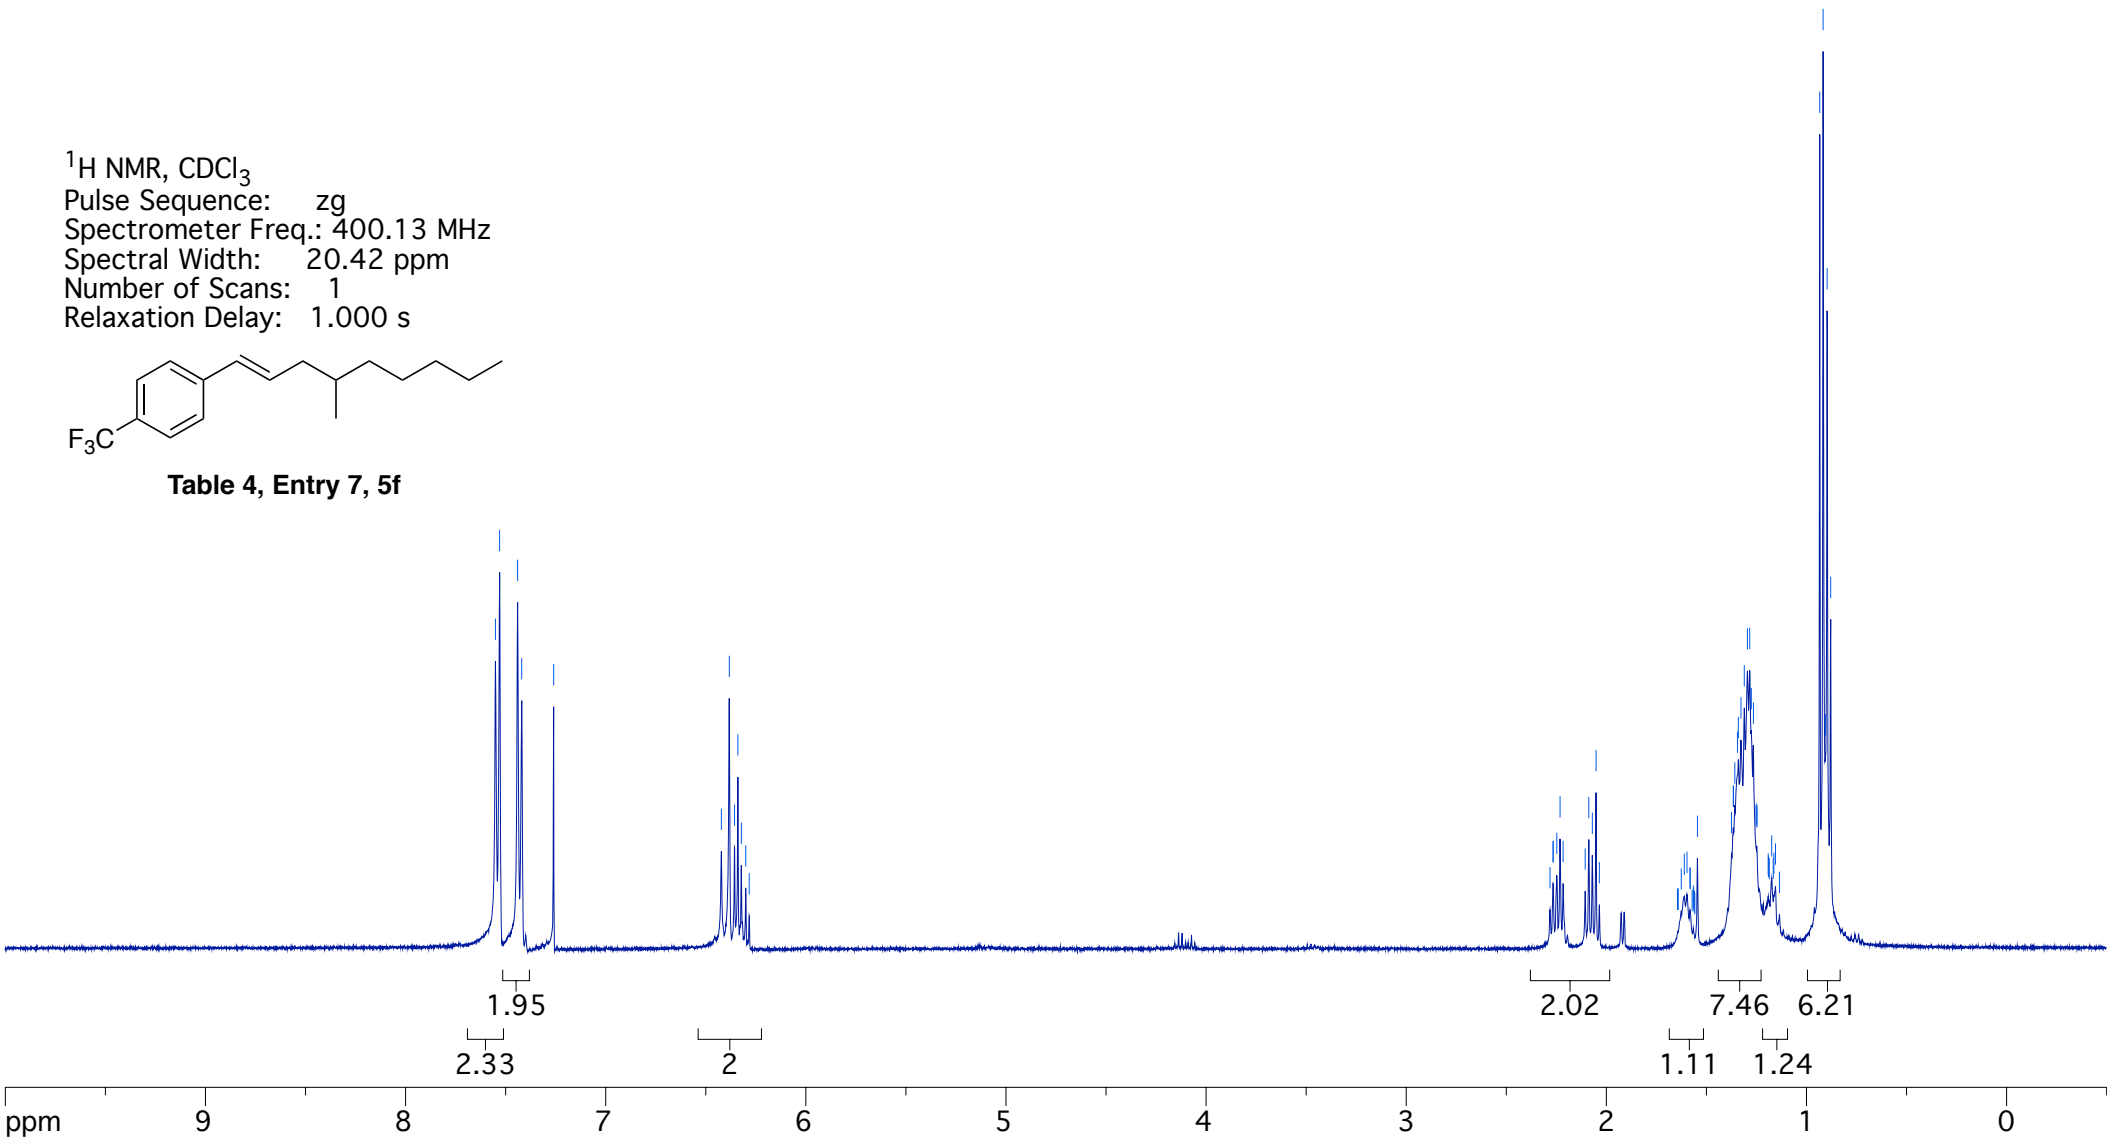

S81

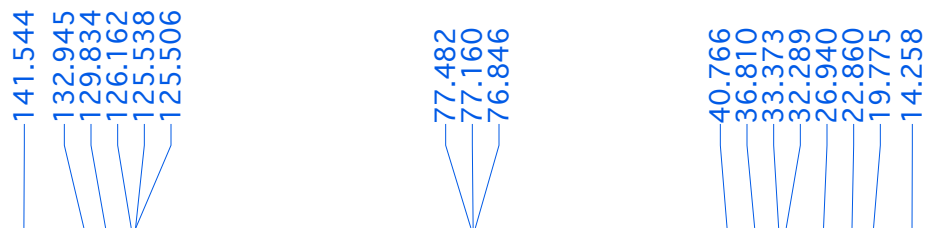

<sup>13</sup>C NMR, CDCl<sub>3</sub>  
Pulse Sequence: zgdc  
Spectrometer Freq.: 100.62 MHz  
Spectral Width: 301.16 ppm  
Number of Scans: 215  
Relaxation Delay: 2.000 s

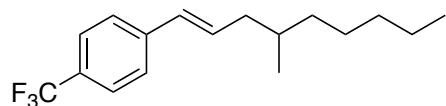

Table 4, Entry 7, 5f

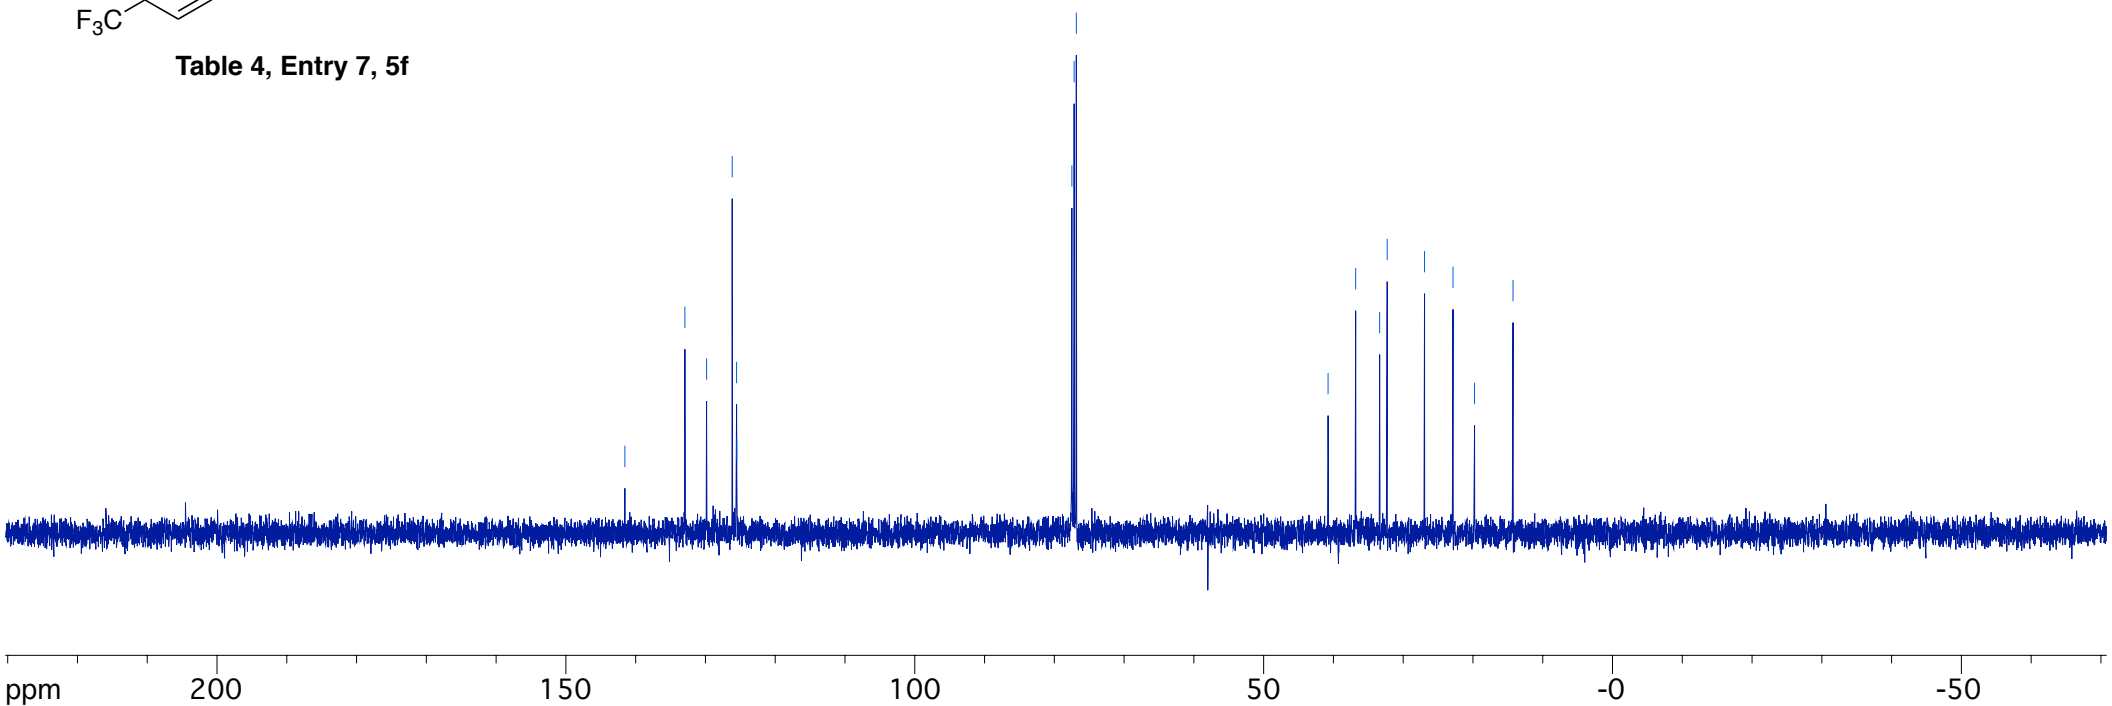

62.845

S82

$^{19}\text{F}$  NMR,  $\text{CDCl}_3$   
Pulse Sequence: zg  
Spectrometer Freq.: 376.50 MHz  
Spectral Width: 199.70 ppm  
Number of Scans: 4  
Relaxation Delay: 1.000 s

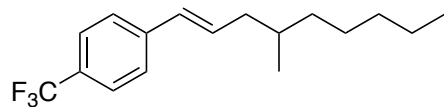

Table 4, Entry 7, 5f

ppm

50

-0

-50

S83

$^1\text{H}$  NMR,  $\text{CDCl}_3$   
Pulse Sequence: zg  
Spectrometer Freq.: 400.13 MHz  
Spectral Width: 20.42 ppm  
Number of Scans: 1  
Relaxation Delay: 1.000 s

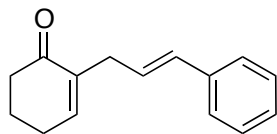

Table 5, Entry 3, 7a

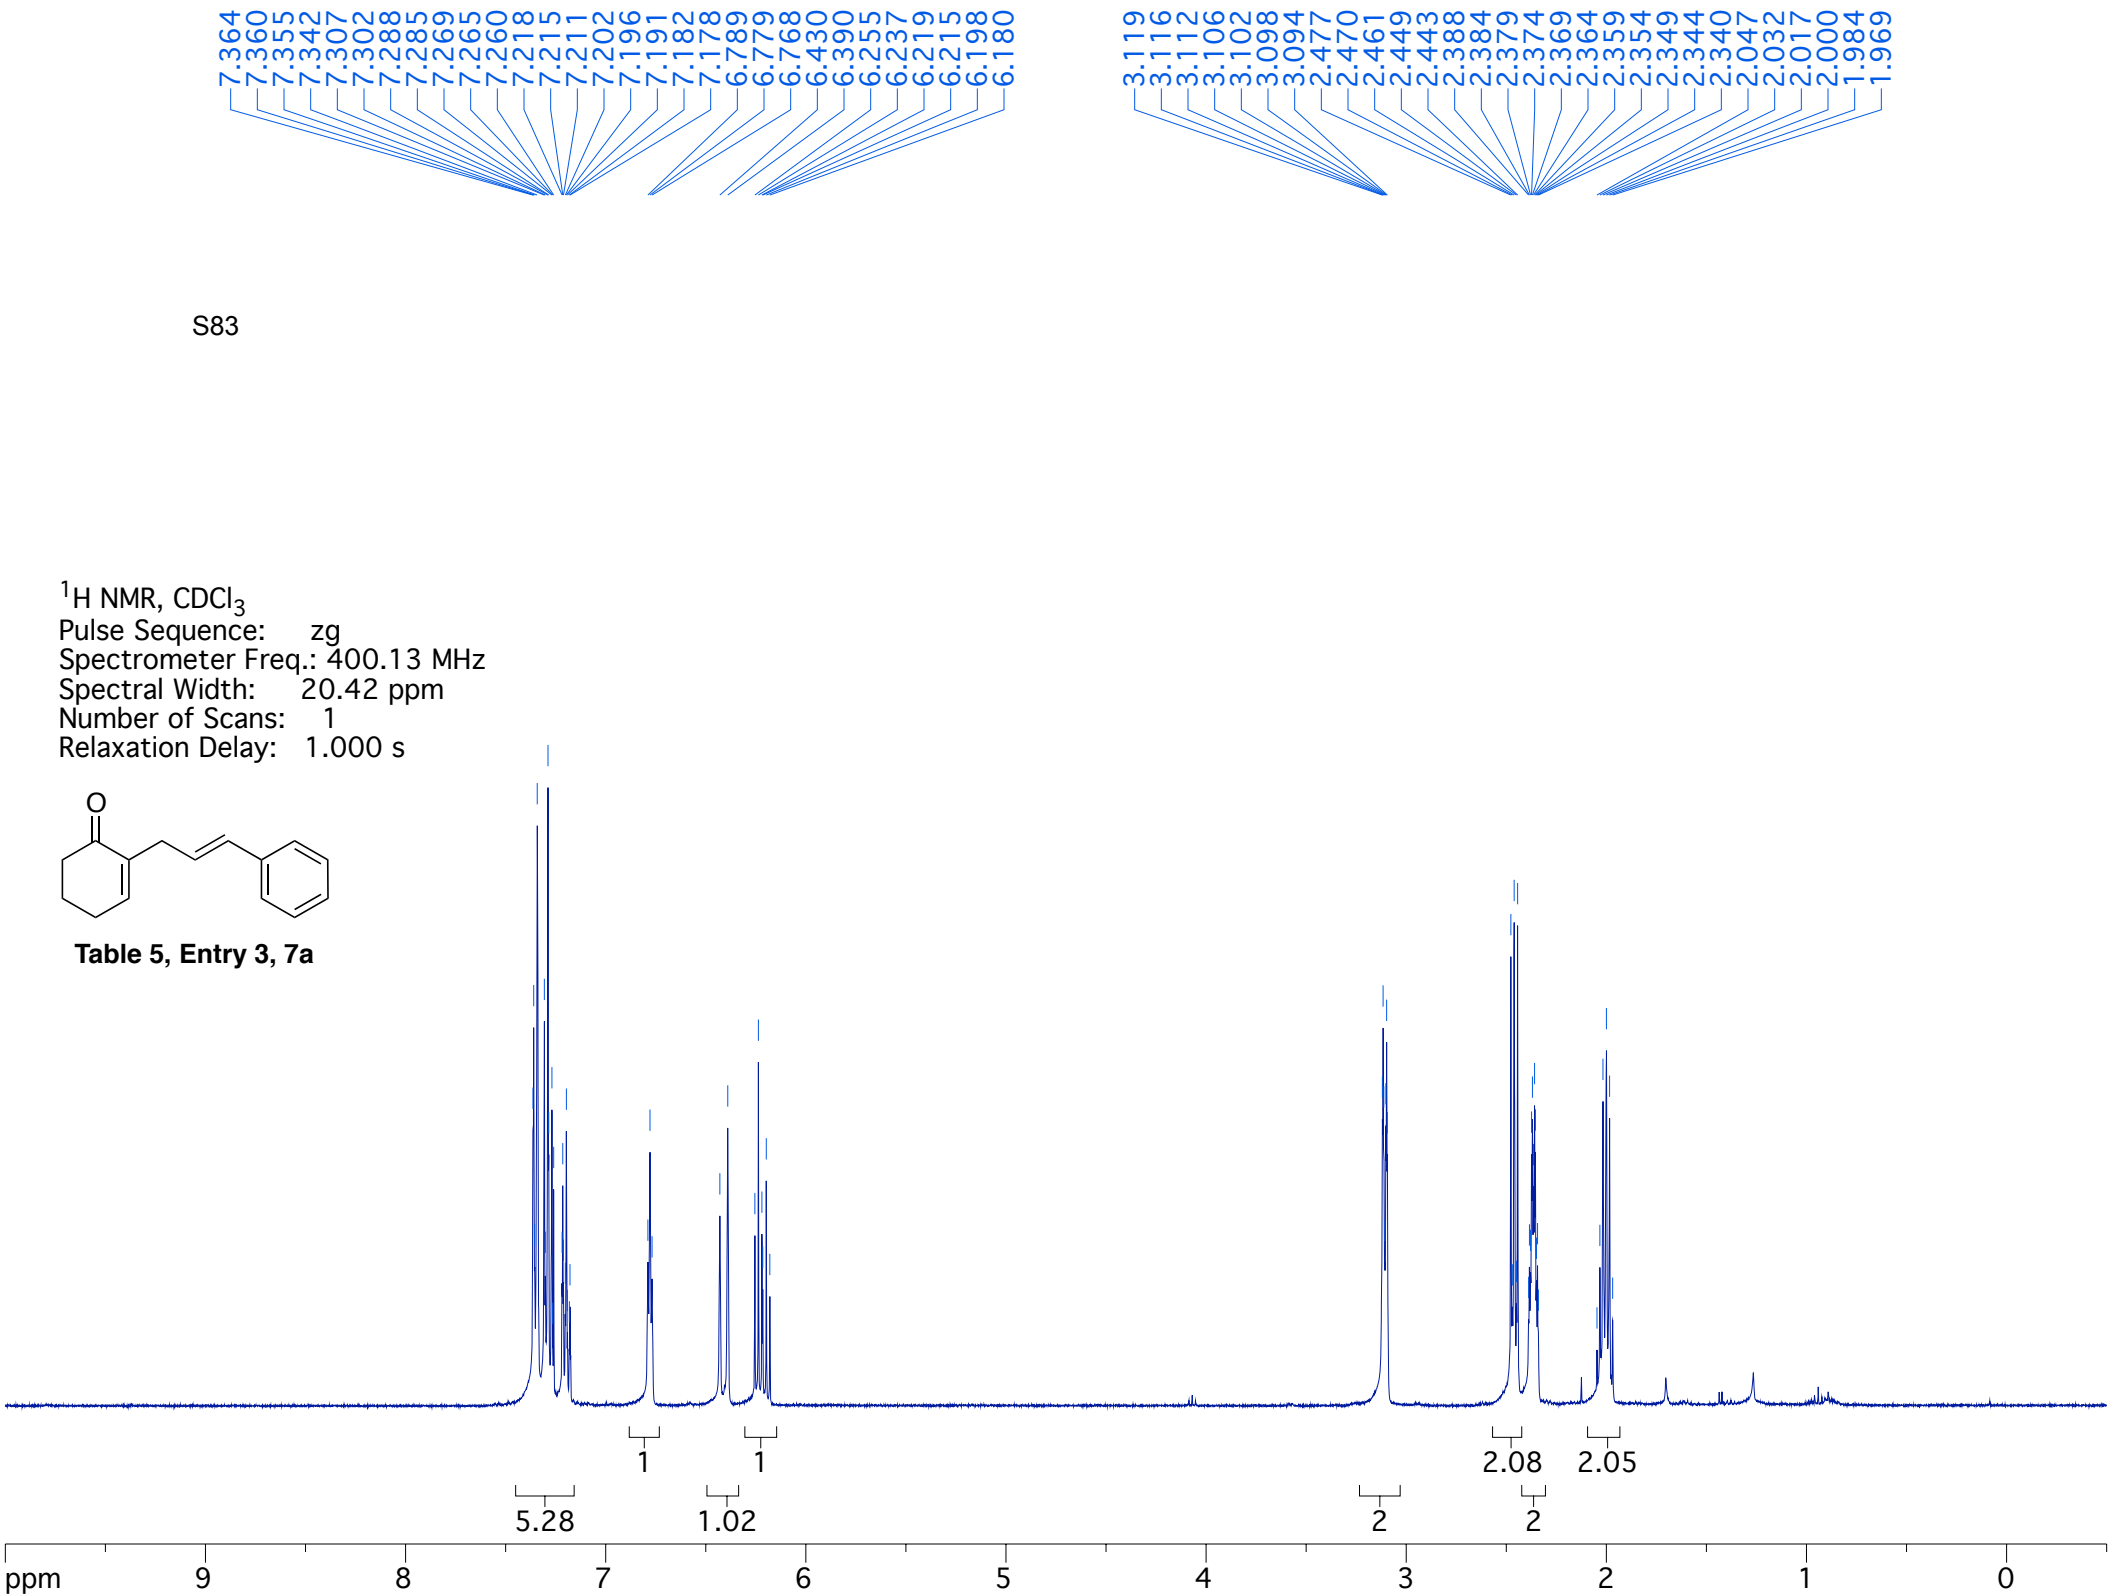

$^{13}\text{C}$  NMR,  $\text{CDCl}_3$   
Pulse Sequence: zgdc  
Spectrometer Freq.: 100.62 MHz  
Spectral Width: 301.16 ppm  
Number of Scans: 166  
Relaxation Delay: 2.000 s

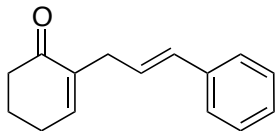

Table 5, Entry 3, 7a

199.114  
S84

146.083  
138.418  
137.573  
131.709  
128.584  
127.738  
127.168  
126.158

77.482  
77.160  
76.841

38.570  
32.854  
26.218  
23.204

ppm

200

150

100

50

-0

-50

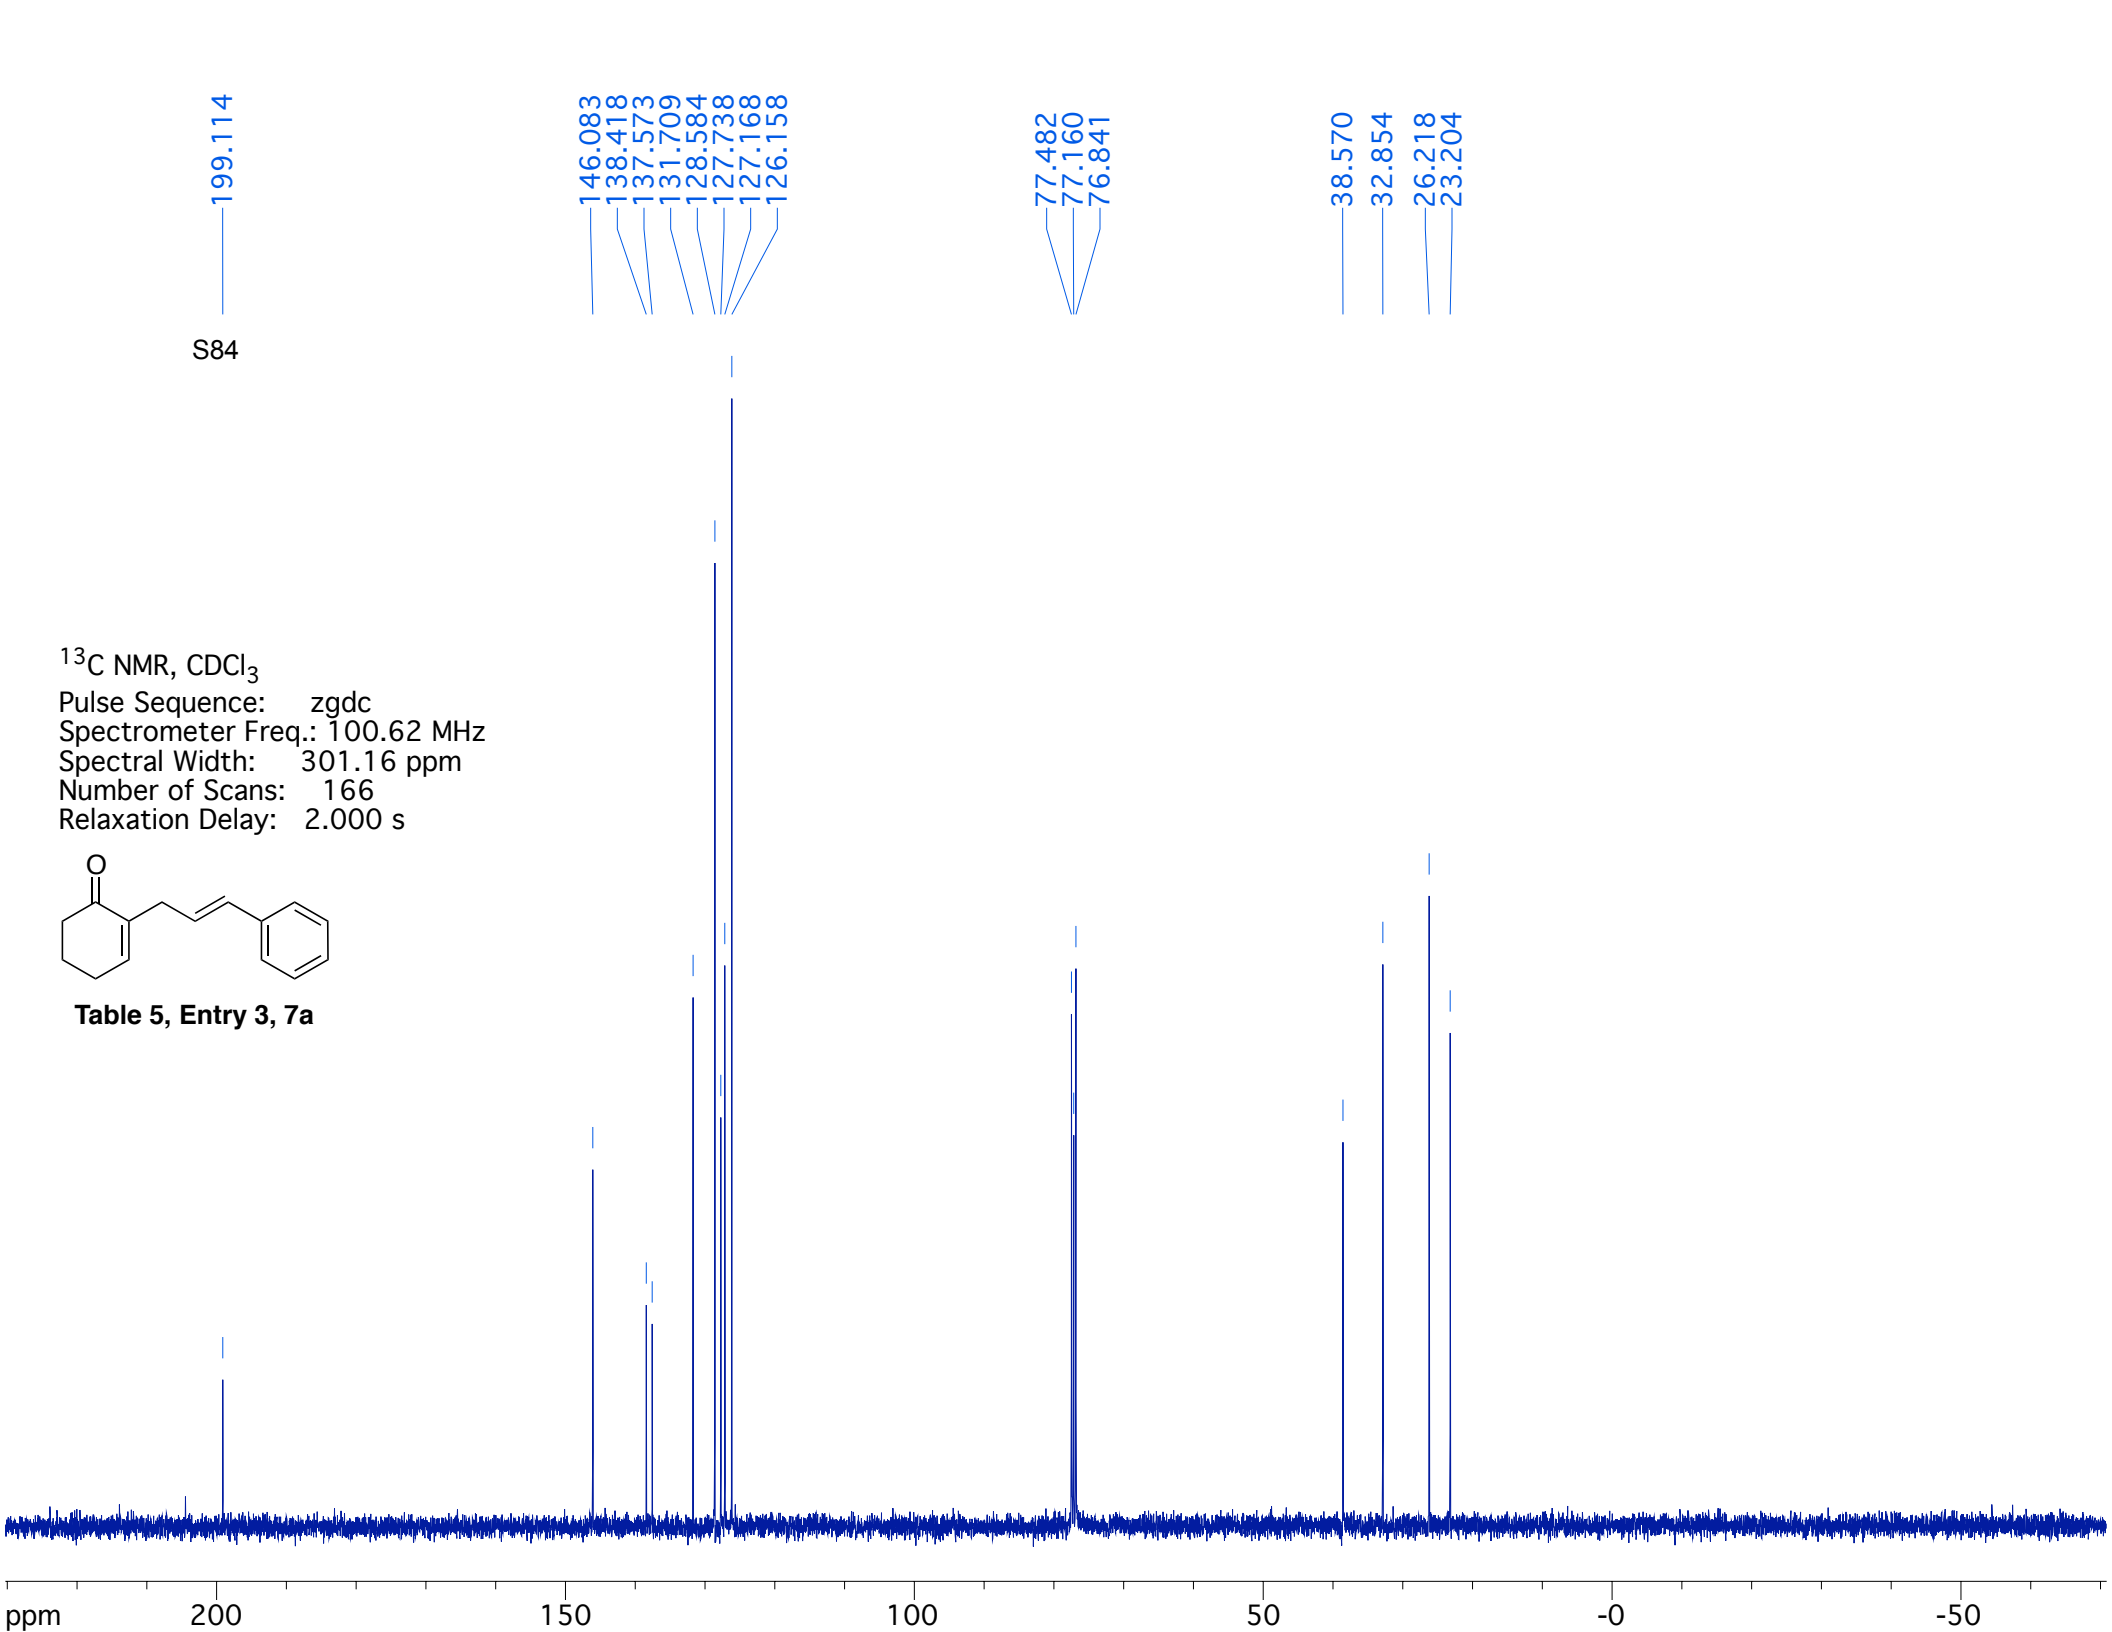

S85

<sup>1</sup>H NMR, CDCl<sub>3</sub>  
Pulse Sequence: zg  
Spectrometer Freq.: 400.13 MHz  
Spectral Width: 20.42 ppm  
Number of Scans: 1  
Relaxation Delay: 1.000 s

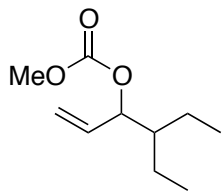

**Table 6, 2m**  
**(4-ethylhex-1-en-3-yl**  
**methyl carbonate)**

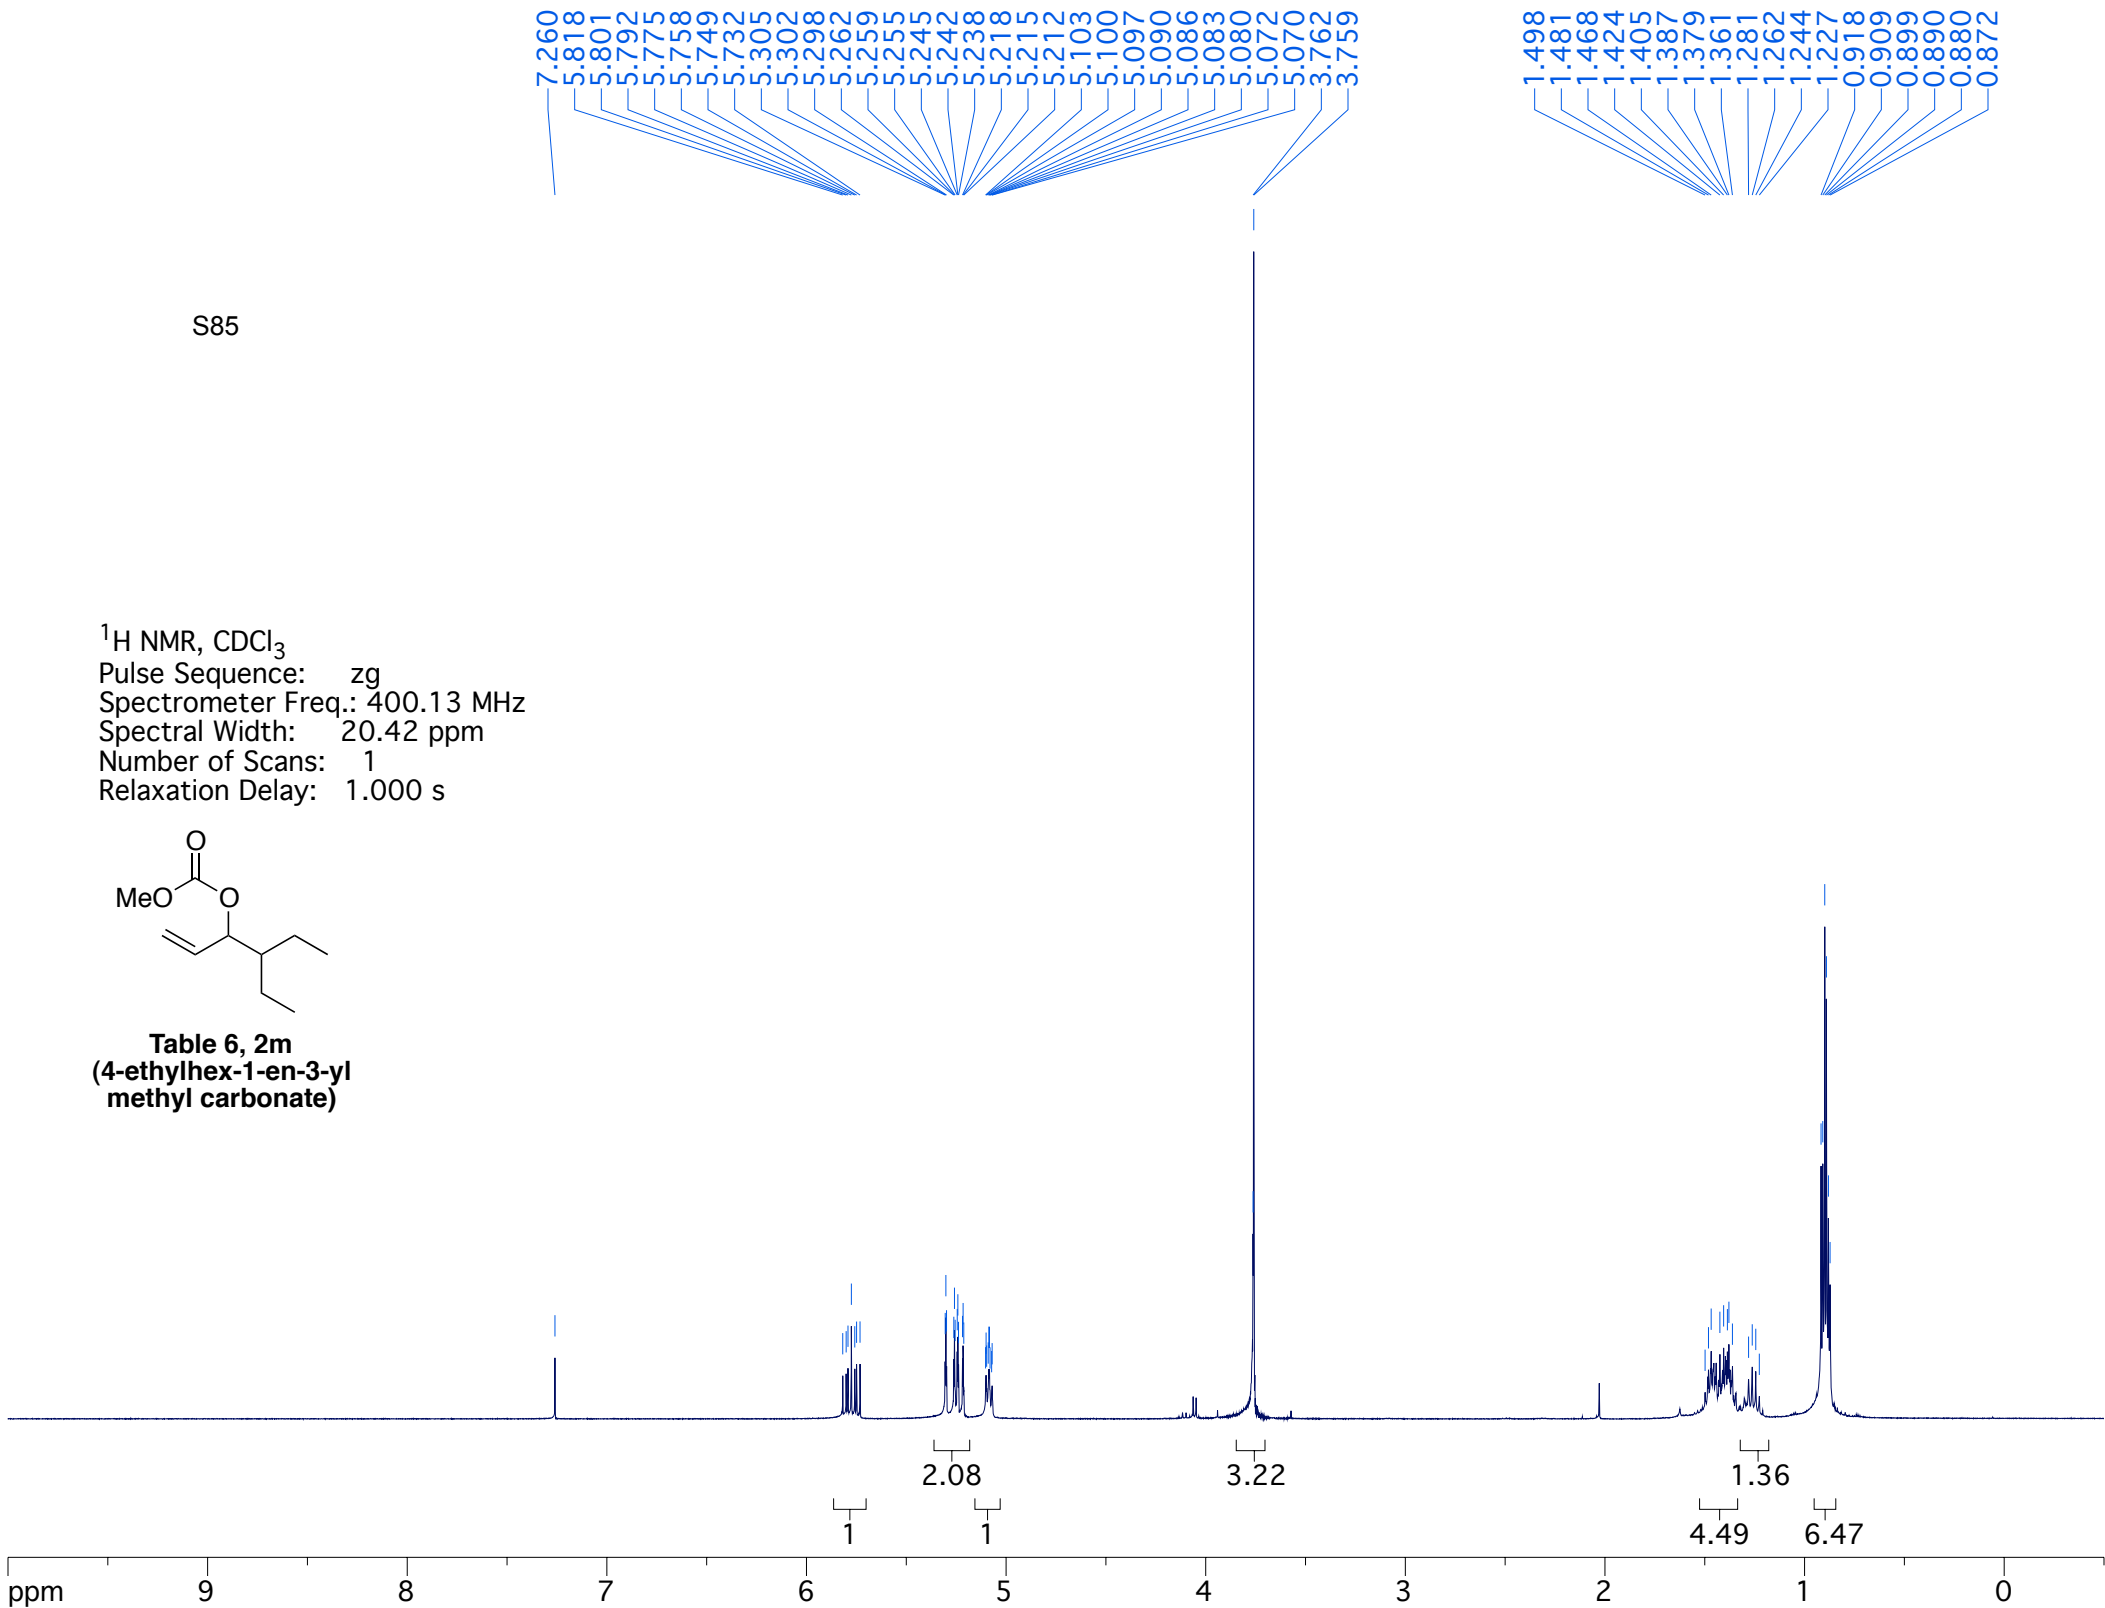



S86

$^{13}\text{C}$  NMR,  $\text{CDCl}_3$   
Pulse Sequence: zgdc  
Spectrometer Freq.: 100.62 MHz  
Spectral Width: 301.16 ppm  
Number of Scans: 88  
Relaxation Delay: 2.000 s

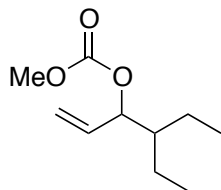

**Table 6, 2m**  
**(4-ethylhex-1-en-3-yl**  
**methyl carbonate)**

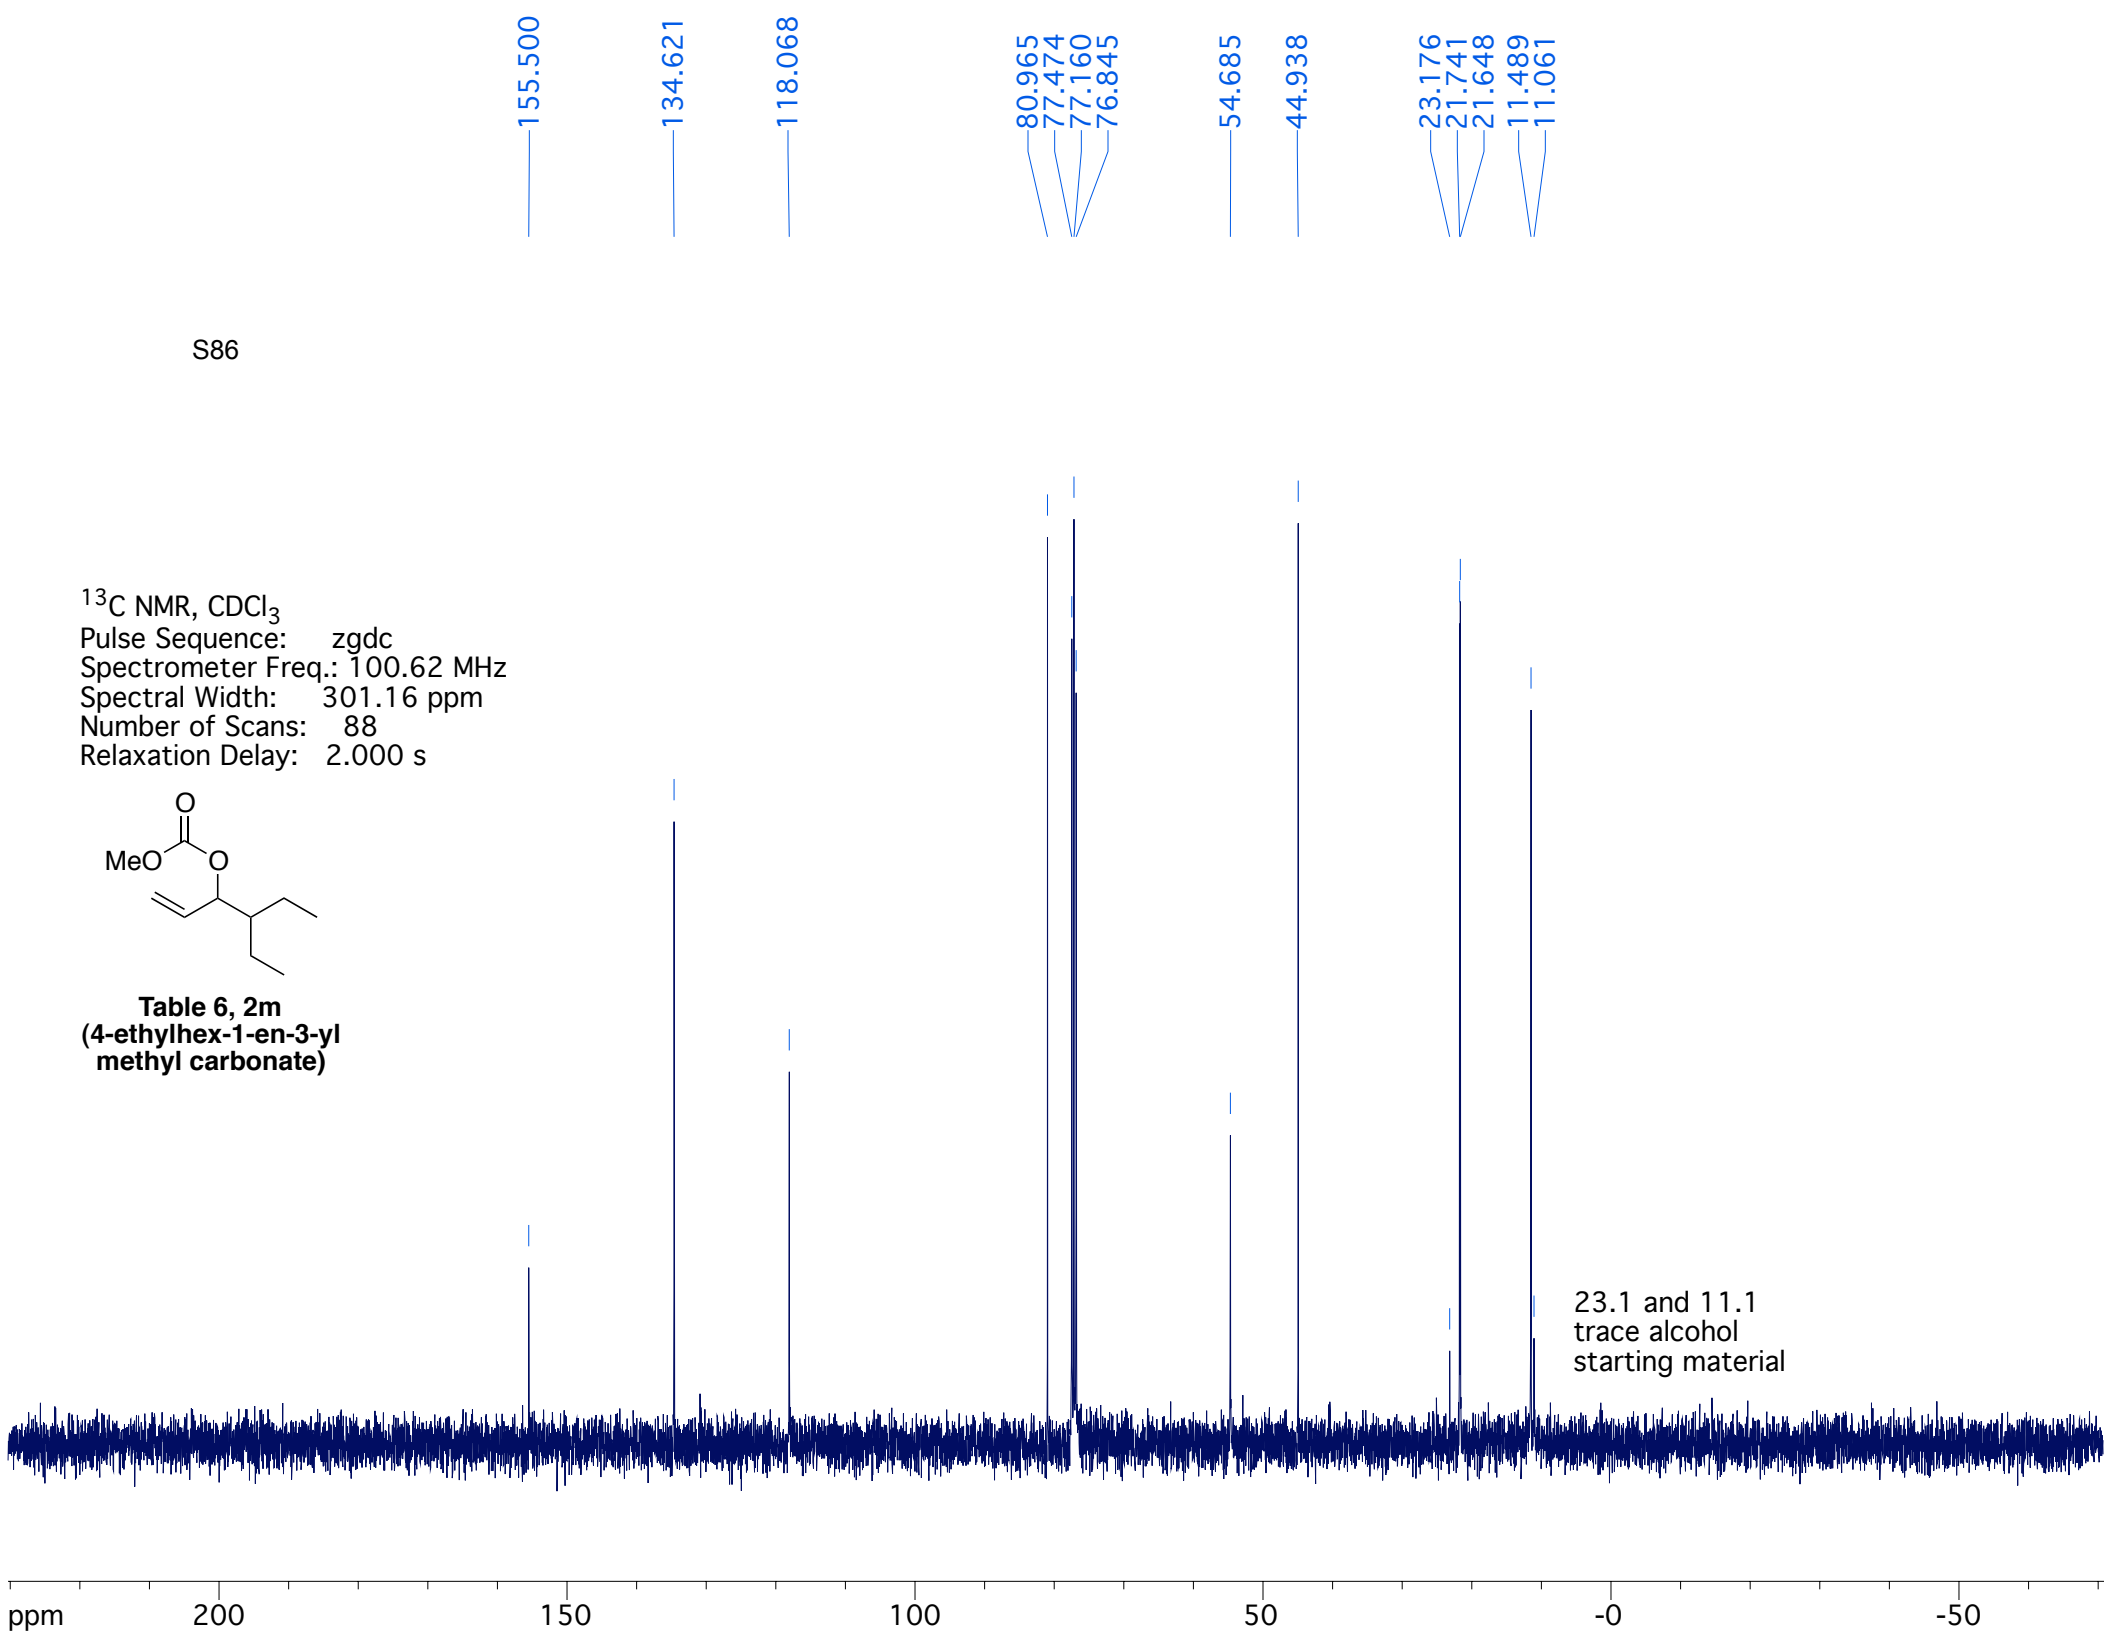

7.313  
7.309  
7.299  
7.294  
7.280  
7.276  
7.260  
7.220  
7.217  
7.199  
7.196  
7.179  
5.890  
5.873  
5.863  
5.847  
5.830  
5.820  
5.804  
5.363  
5.360  
5.357  
5.320  
5.317  
5.314  
5.272  
5.270  
5.267  
5.246  
5.243  
5.241  
5.127  
5.110  
5.094  
5.077  
3.795  
2.765  
2.749  
2.742  
2.730  
2.725  
2.714  
2.710  
2.706  
2.693  
2.690  
2.687  
2.670  
2.659  
2.651  
2.635  
2.110  
2.092  
2.076  
2.051  
2.033  
2.017  
1.987  
1.972  
1.947  
1.932  
1.898

S87

$^1\text{H}$  NMR,  $\text{CDCl}_3$   
Pulse Sequence: zg  
Spectrometer Freq.: 400.13 MHz  
Spectral Width: 20.42 ppm  
Number of Scans: 1  
Relaxation Delay: 1.000 s

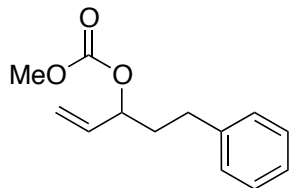

**Table 6, 2n**  
**(5-phenylpent-1-en-3-yl**  
**methyl carbonate)**

with  $\text{CDCl}_3$

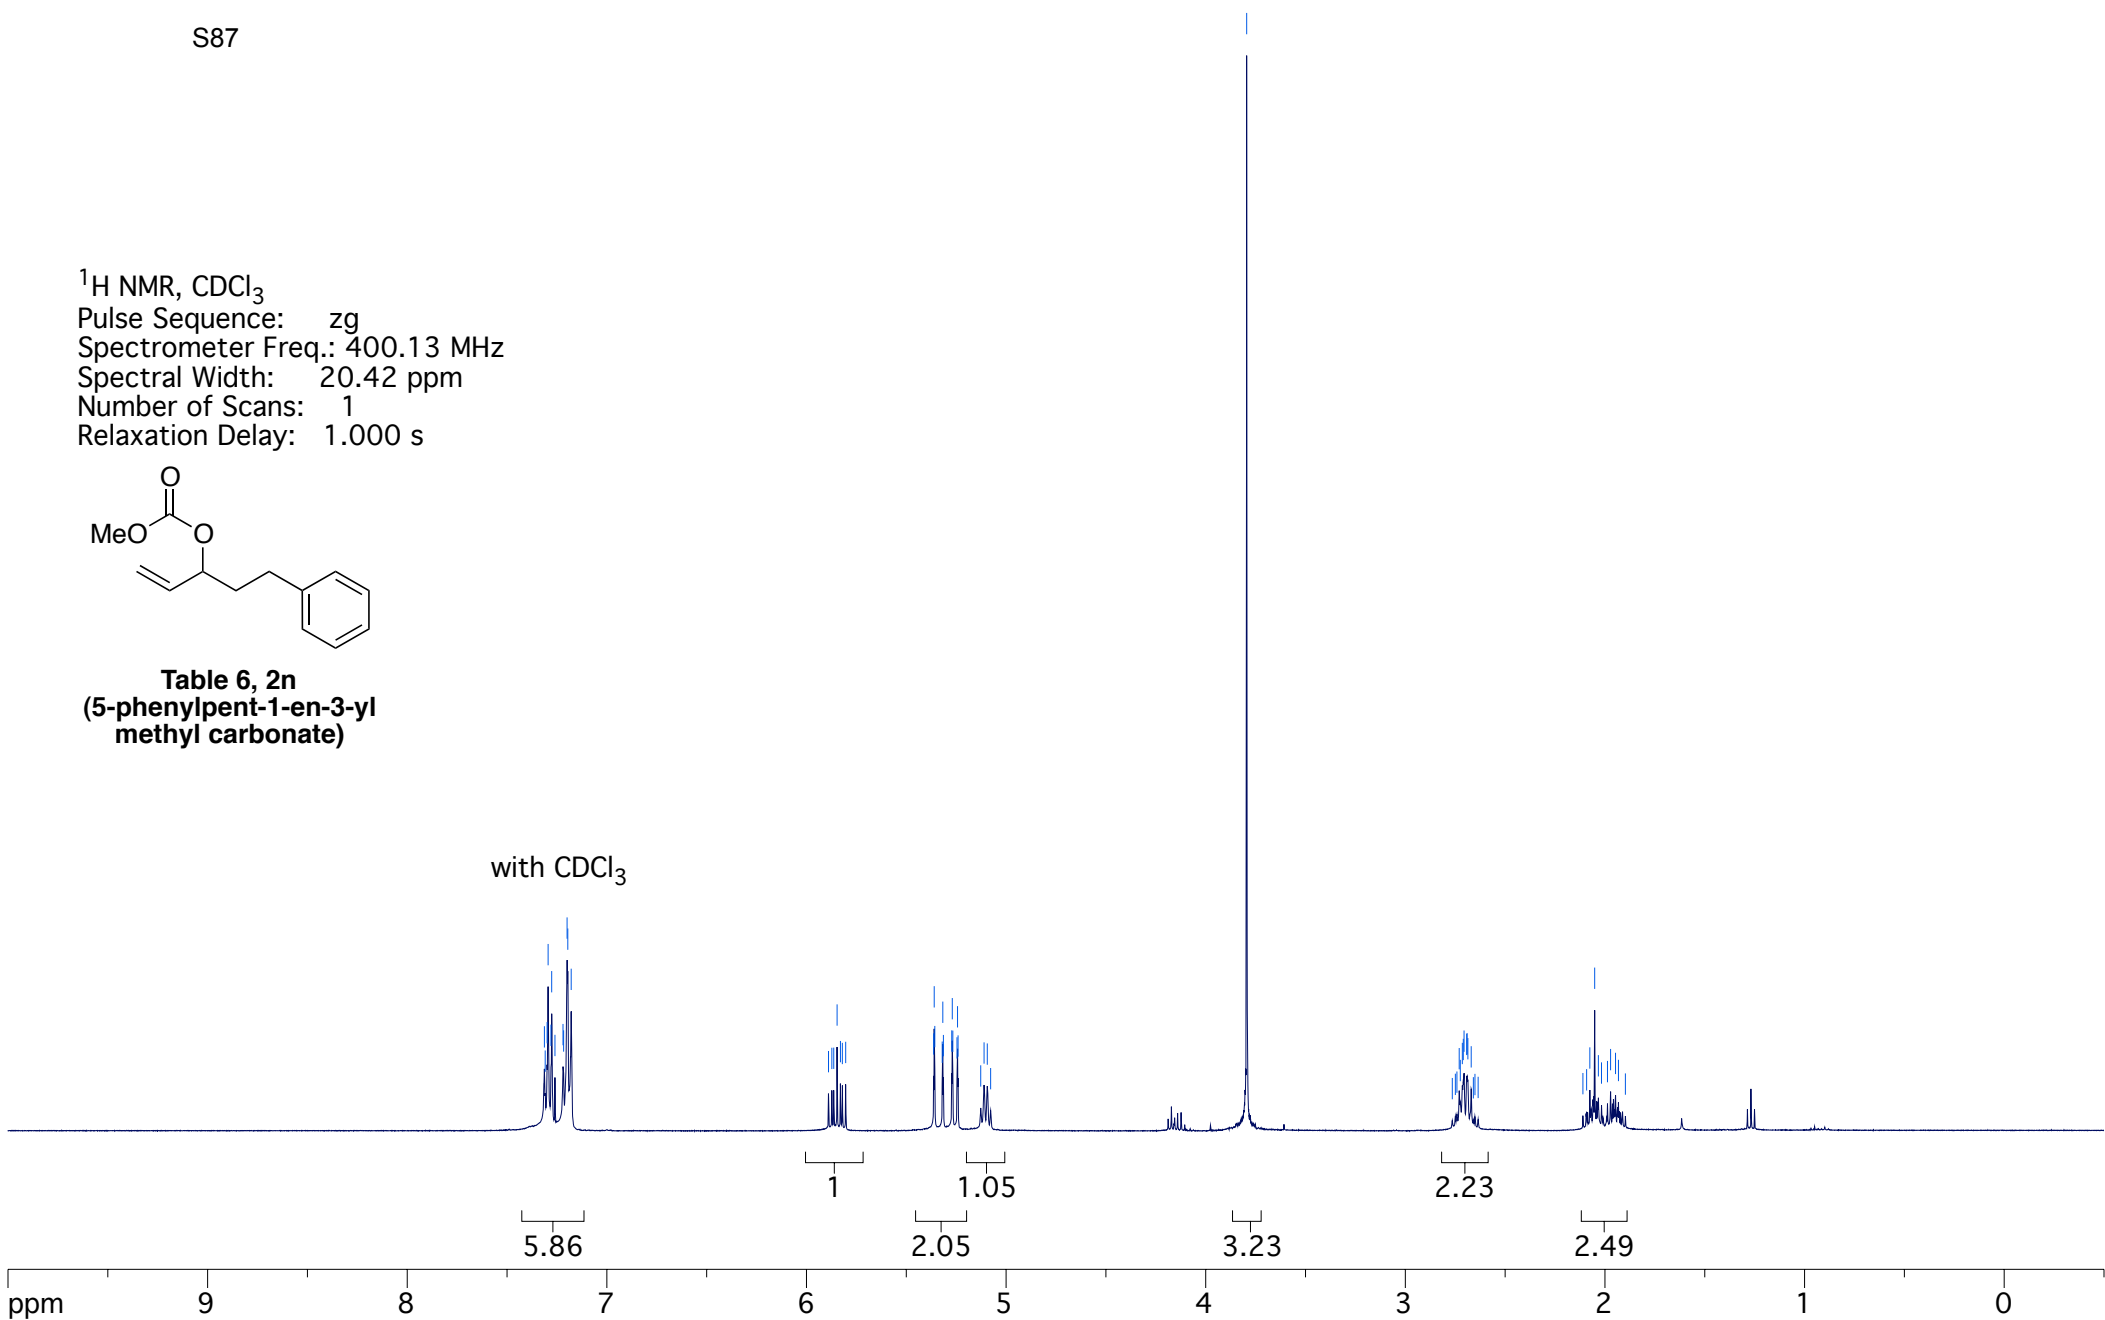

S88

$^{13}\text{C}$  NMR,  $\text{CDCl}_3$   
Pulse Sequence: zgdc  
Spectrometer Freq.: 100.62 MHz  
Spectral Width: 301.16 ppm  
Number of Scans: 102  
Relaxation Delay: 2.000 s

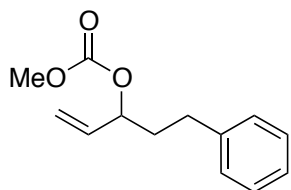

**Table 6, 2n**  
**(5-phenylpent-1-en-3-yl**  
**methyl carbonate)**

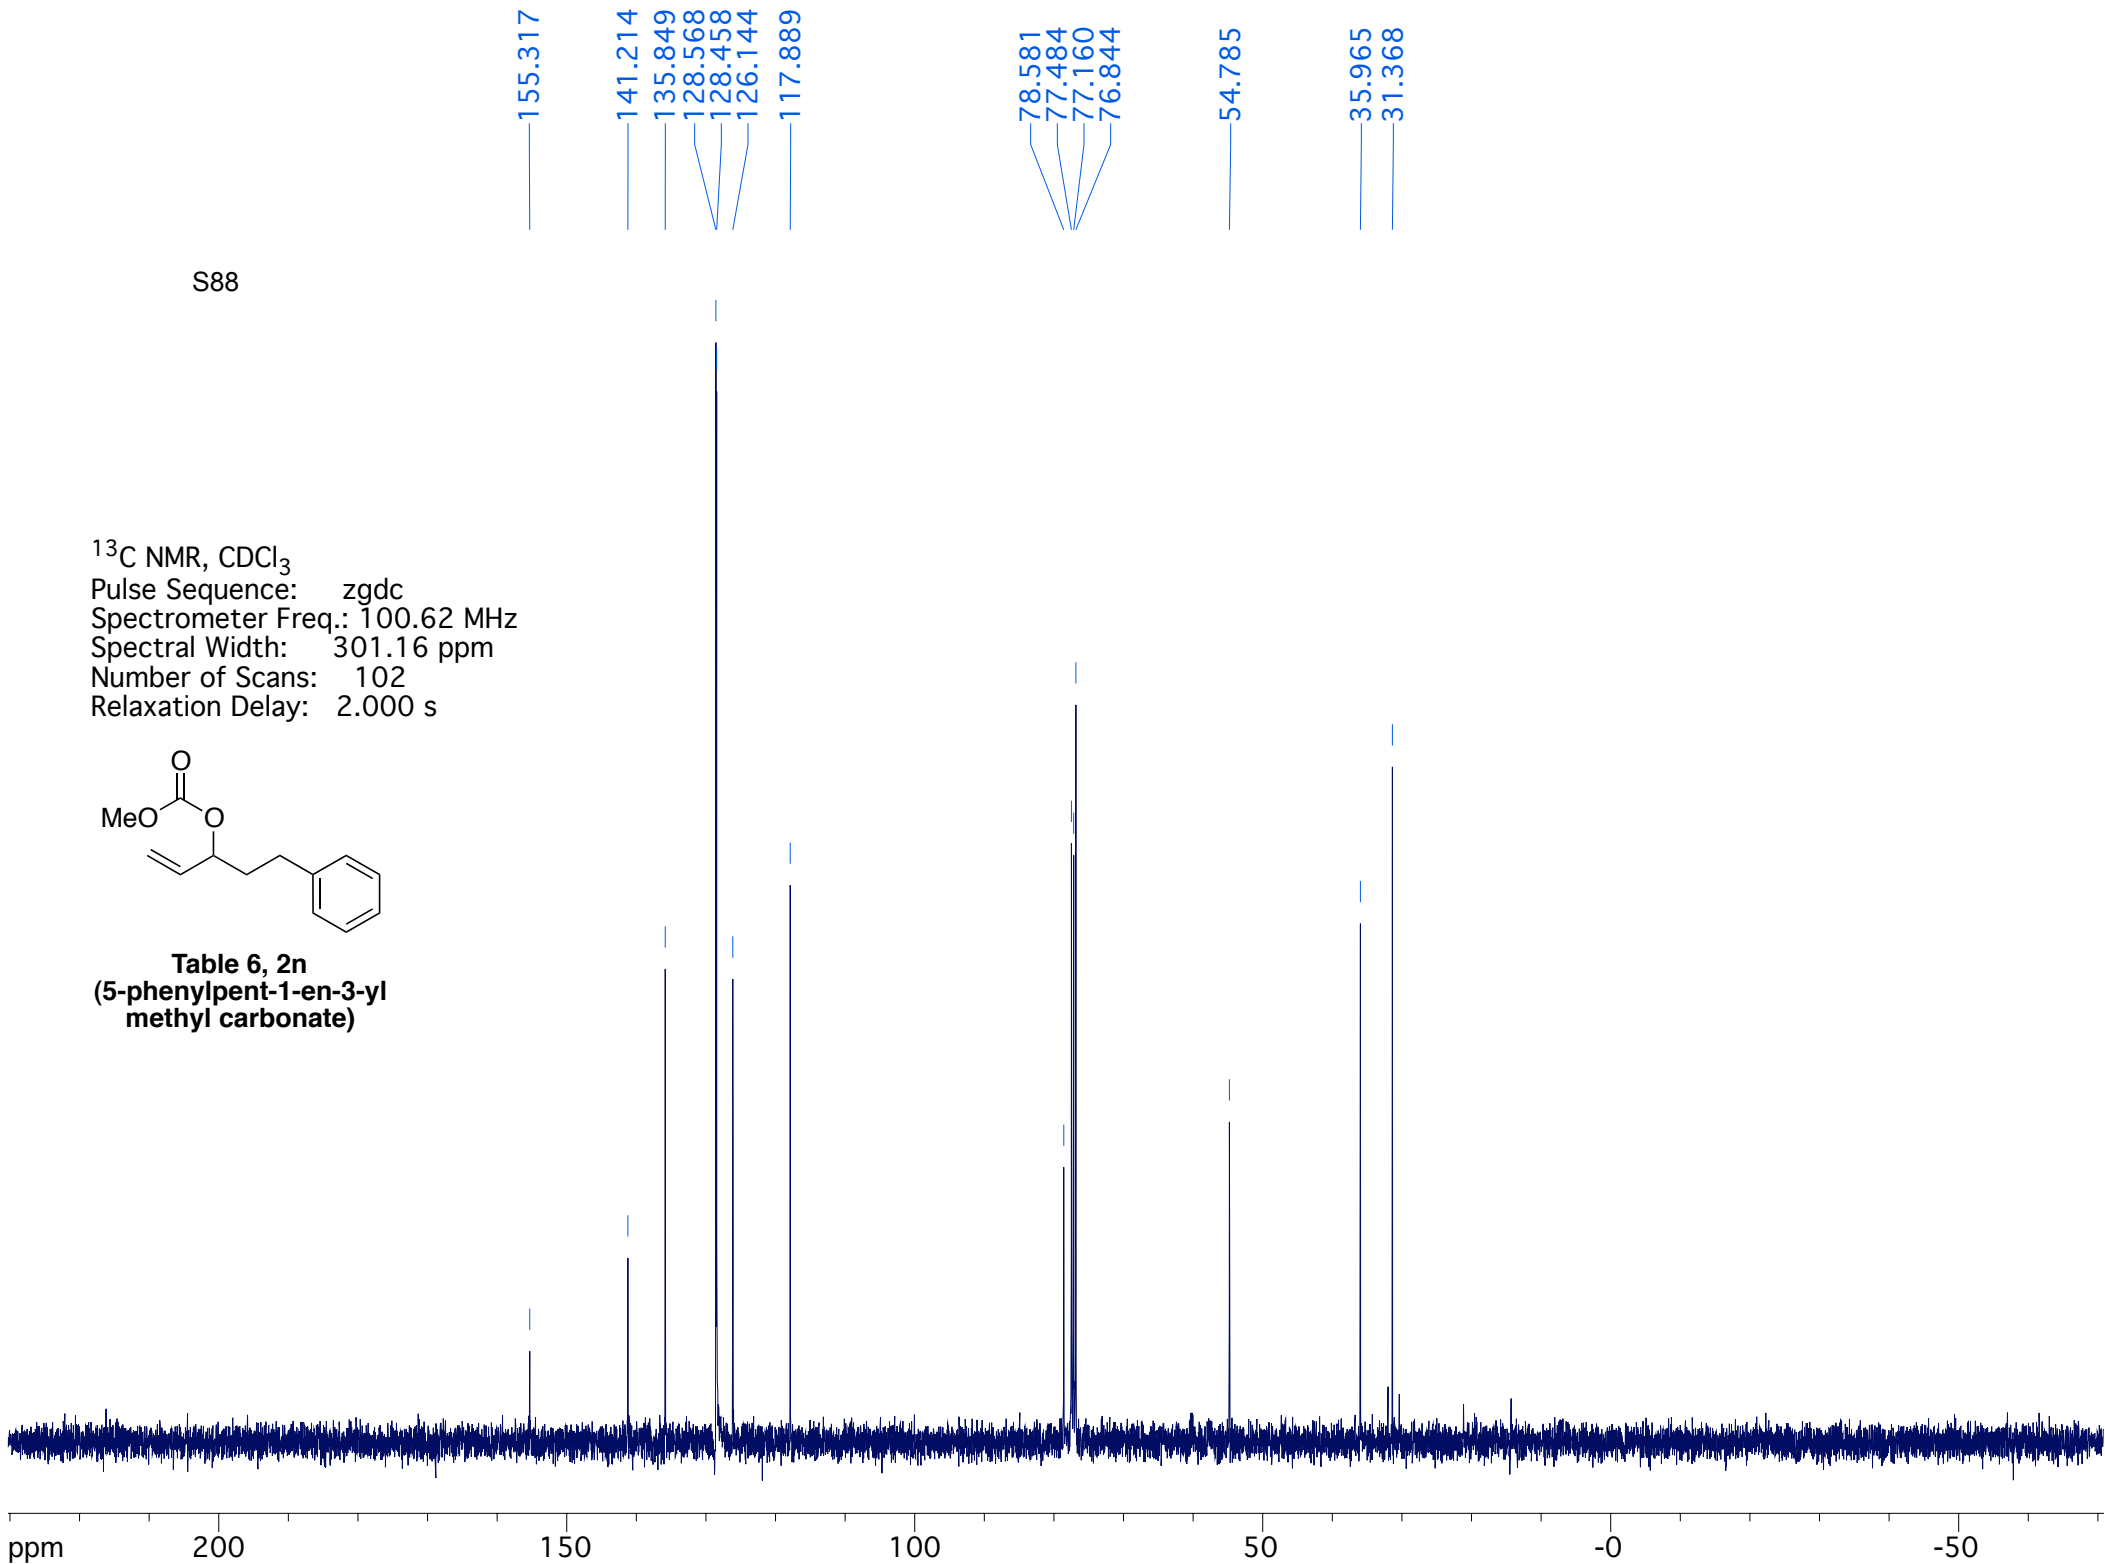

7.260  
6.710  
6.700  
6.689  
5.358  
5.341  
5.320  
5.303  
5.286  
5.173  
5.152  
5.135  
5.114  
2.899  
2.882  
2.435  
2.418  
2.401  
2.368  
2.363  
2.358  
2.353  
2.348  
2.343  
2.338  
2.334  
2.328  
2.323  
2.318  
2.033  
2.002  
1.986  
1.969  
1.953  
1.938  
1.770  
1.757  
1.748  
1.736  
1.725  
1.715  
1.703  
1.693  
1.680  
1.430  
1.418  
1.412  
1.399  
1.398  
1.393  
1.378  
1.366  
1.360  
1.347  
1.341  
1.329  
1.245  
1.233  
1.214  
1.212  
1.199  
1.196  
1.193  
1.180  
1.159  
1.141  
0.835  
0.817  
0.798

S89

<sup>1</sup>H NMR, CDCl<sub>3</sub>  
Pulse Sequence: zg  
Spectrometer Freq.: 400.13 MHz  
Spectral Width: 20.42 ppm  
Number of Scans: 1  
Relaxation Delay: 1.000 s

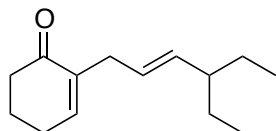

Table 6, Entry 3, 7b

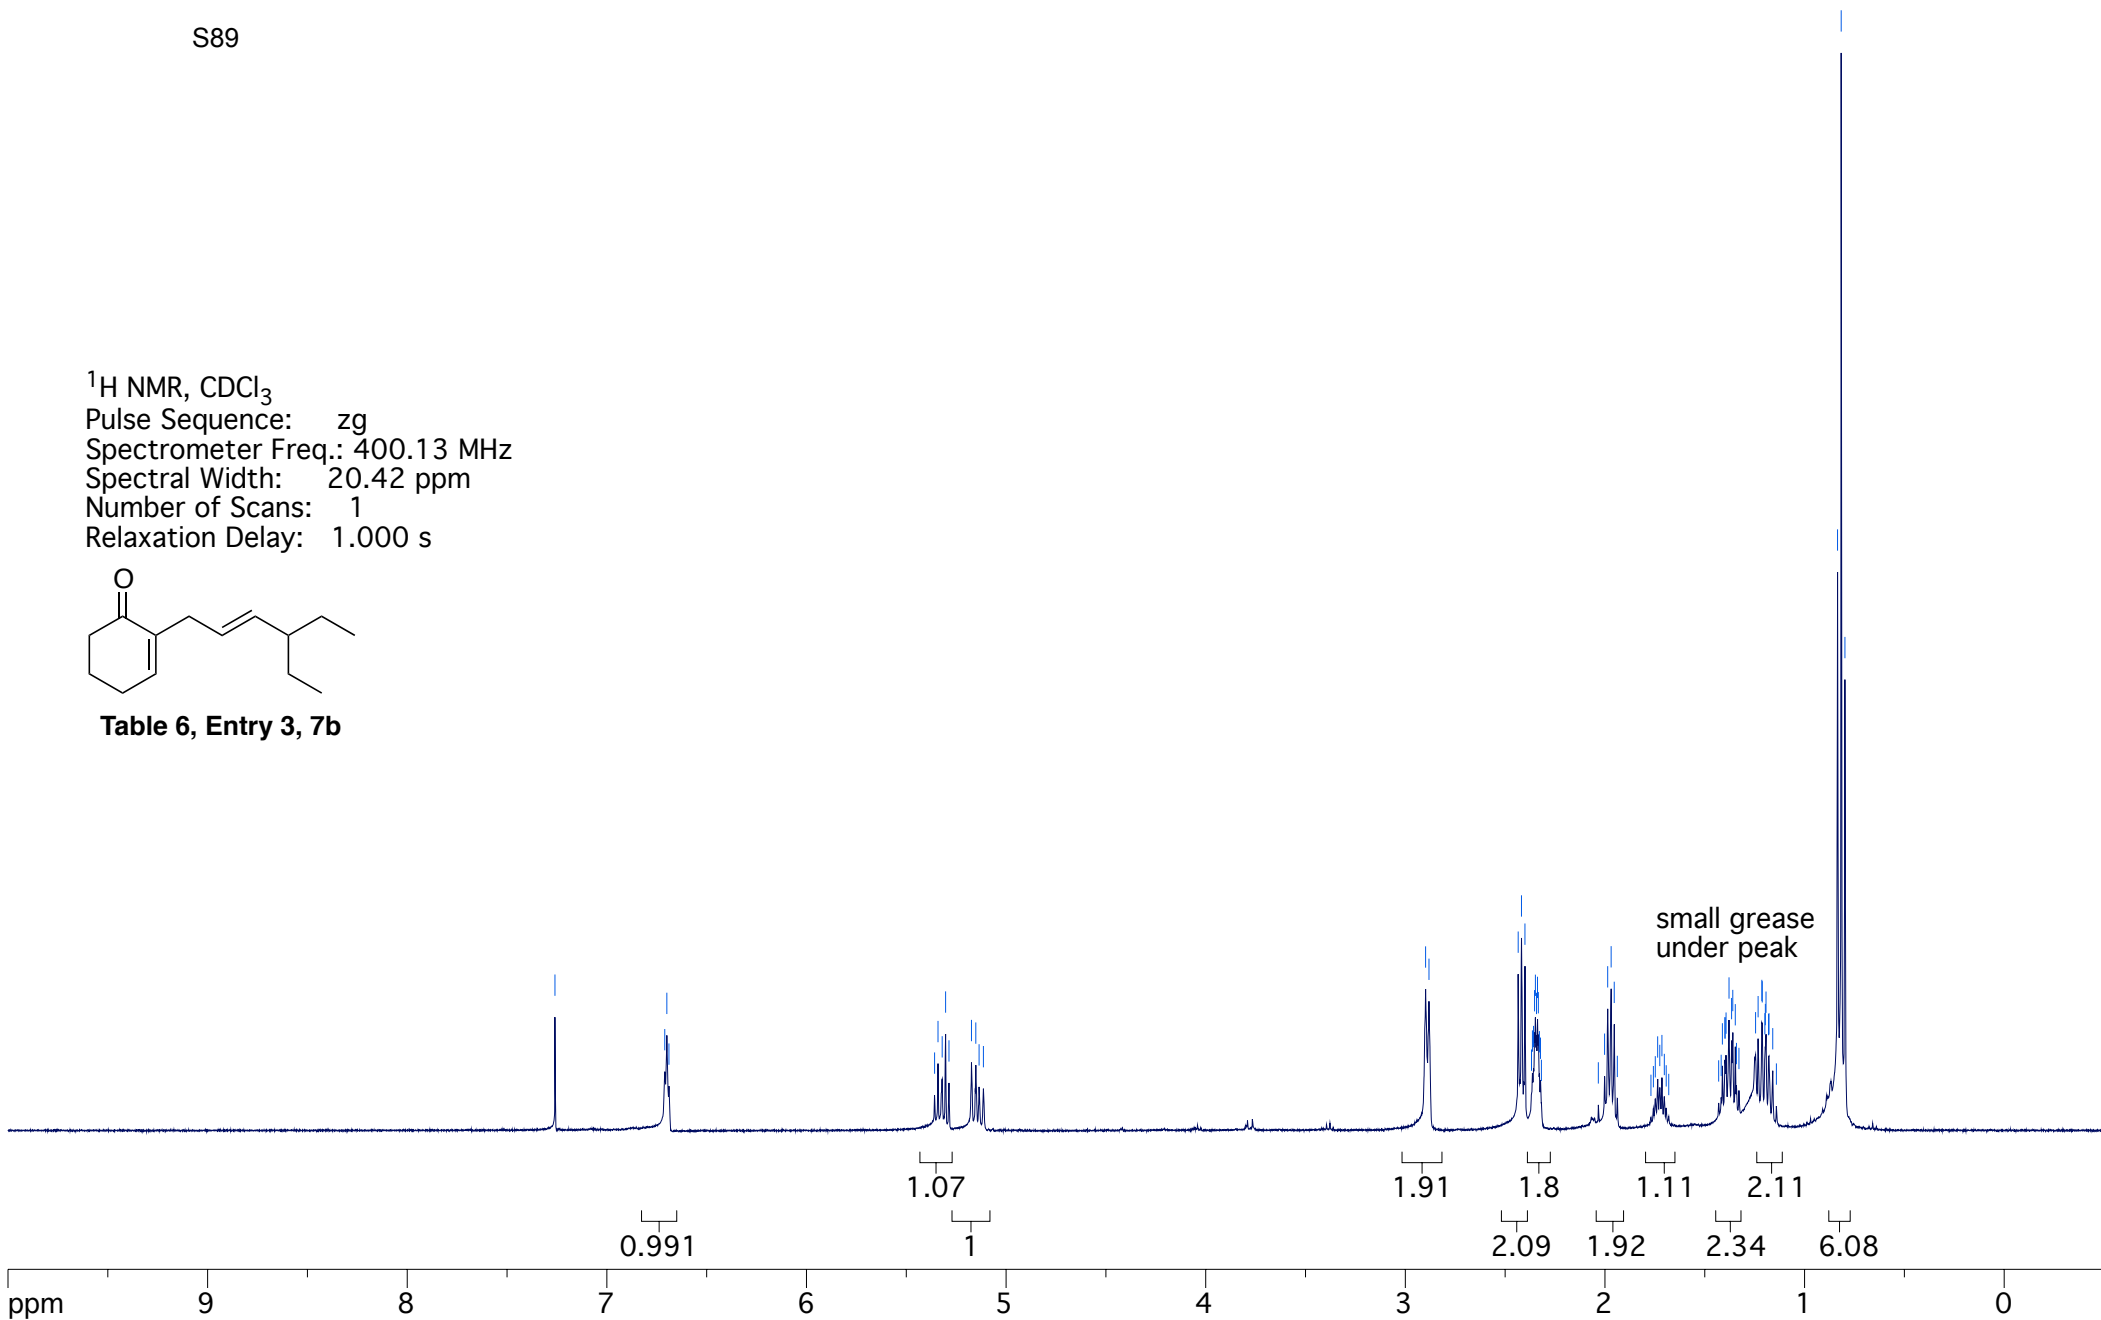

S90

<sup>13</sup>C NMR, CDCl<sub>3</sub>  
Pulse Sequence: zgdc  
Spectrometer Freq.: 100.62 MHz  
Spectral Width: 301.16 ppm  
Number of Scans: 155  
Relaxation Delay: 2.000 s

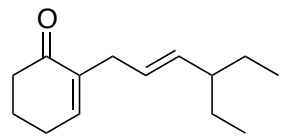

Table 6, Entry 3, 7b

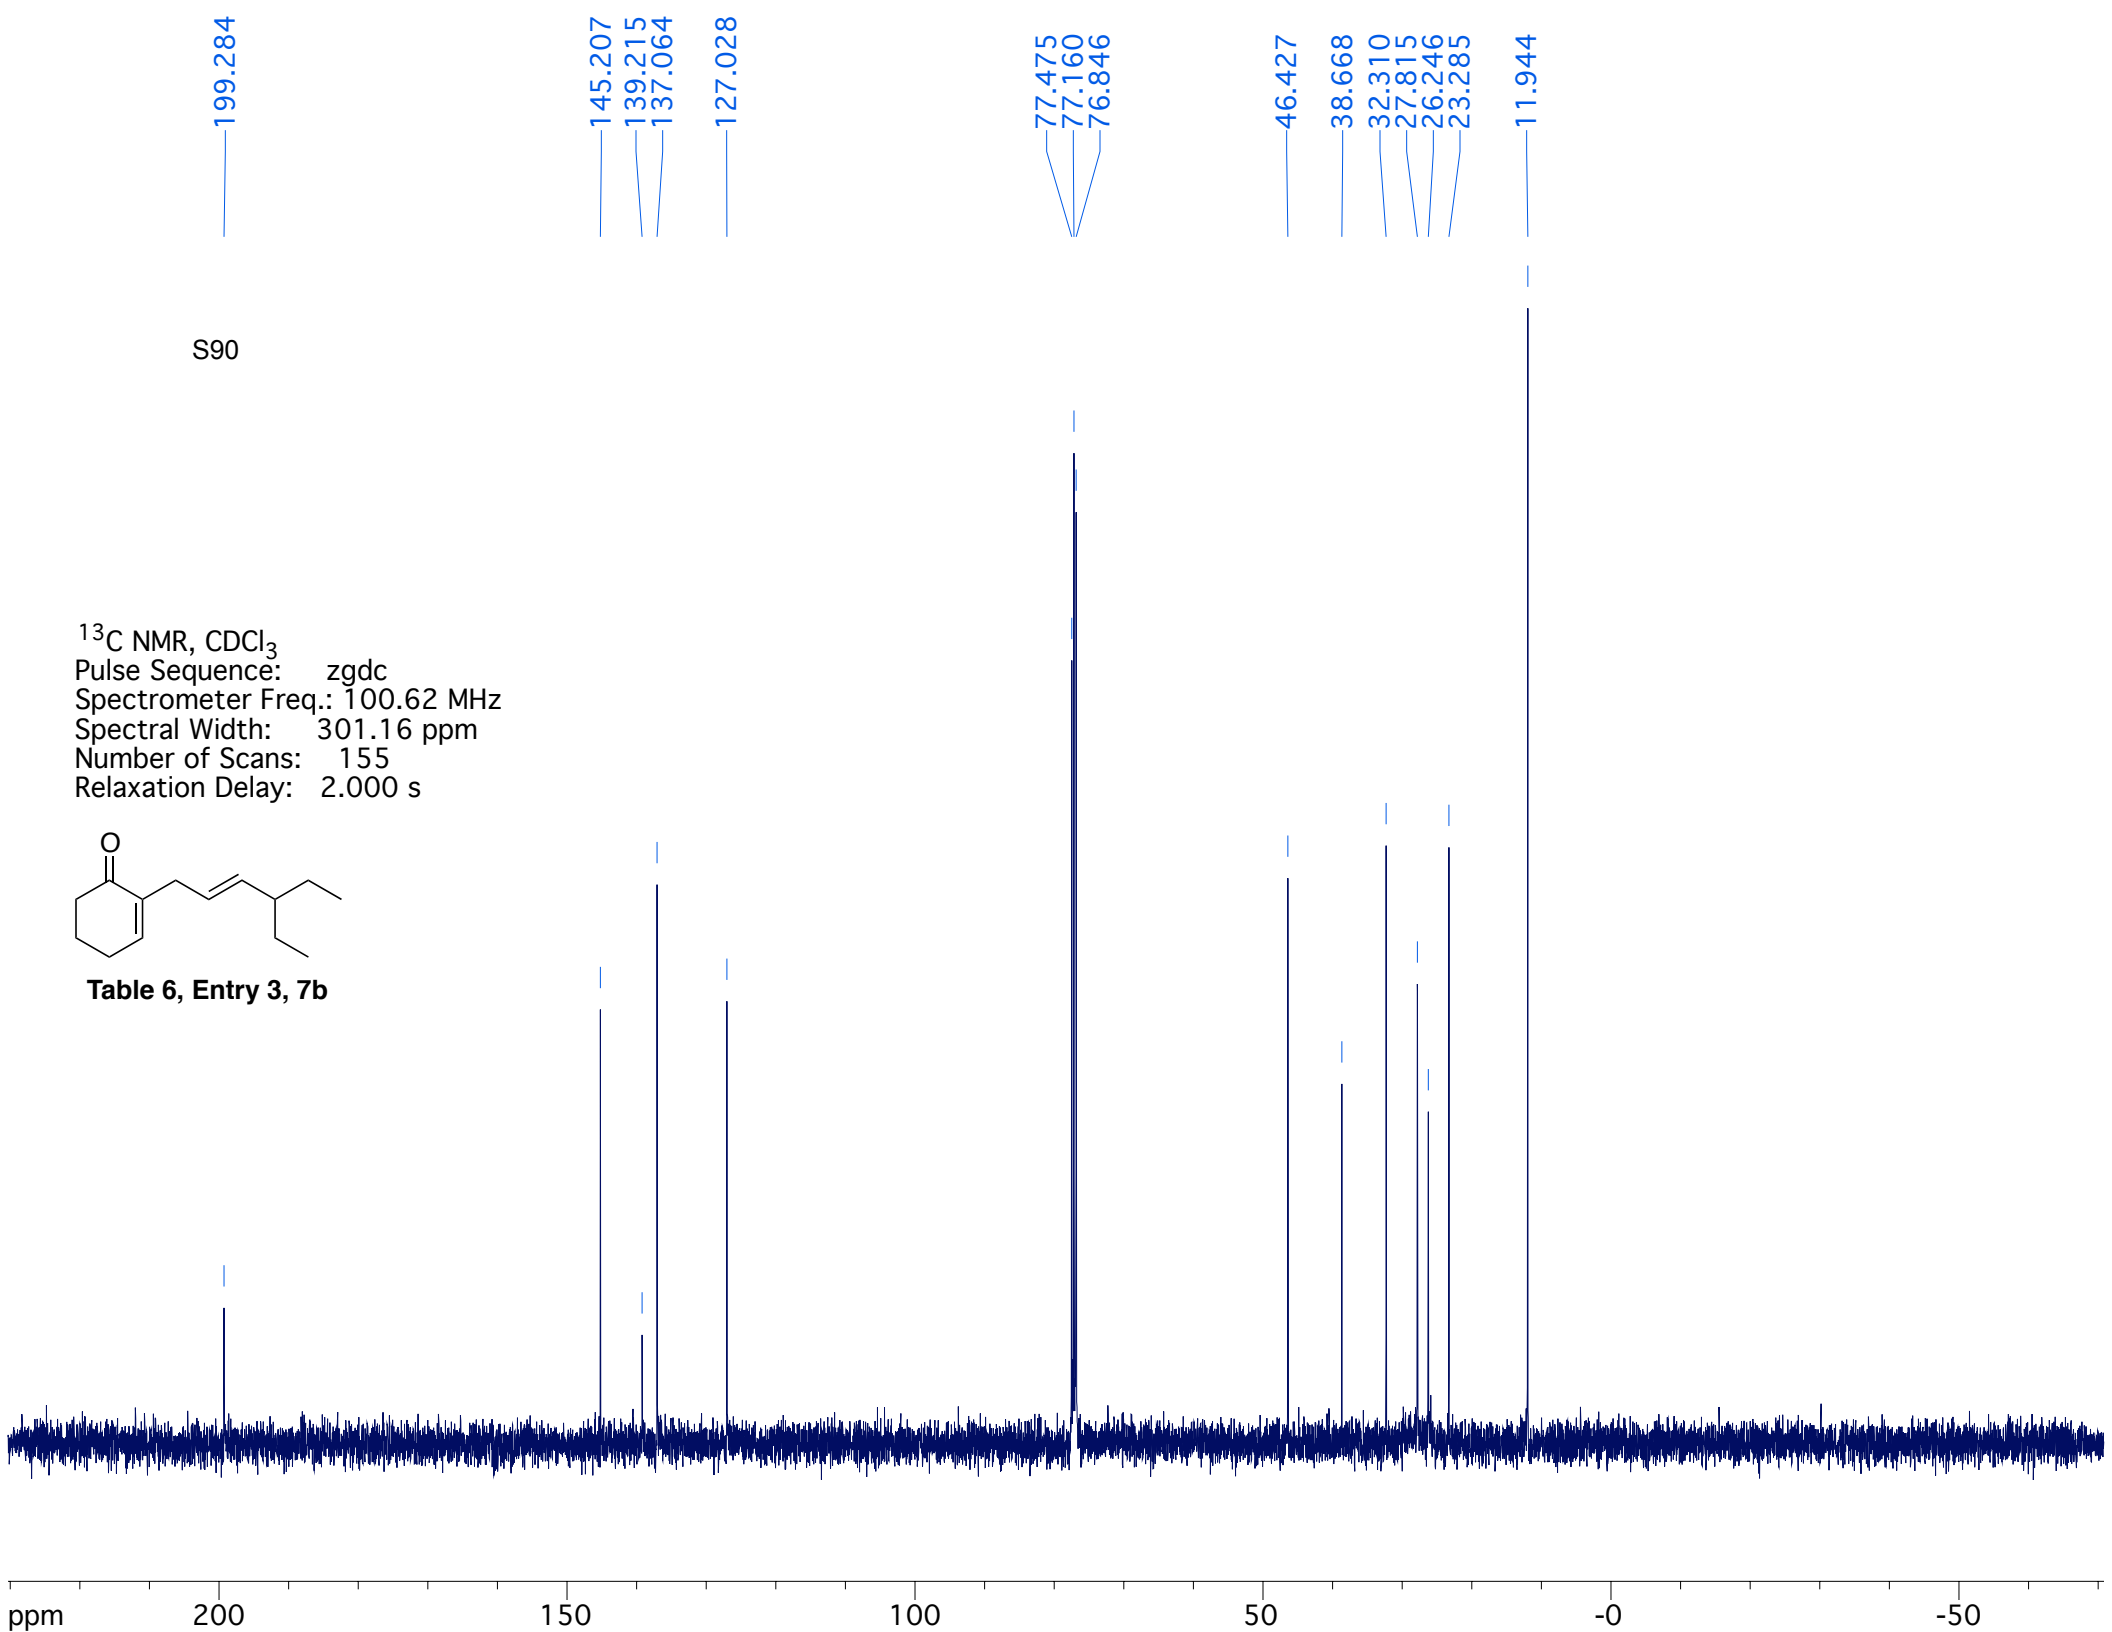

7.291  
7.286  
7.275  
7.271  
7.260  
7.254  
7.253  
7.249  
7.194  
7.191  
7.178  
7.174  
7.158  
6.534  
6.524  
6.513  
5.513  
5.510  
5.494  
5.479  
5.472  
5.456  
5.440  
5.422  
5.409  
5.406  
5.404  
5.393  
5.390  
5.387  
5.384  
5.370  
5.368  
5.366  
5.352  
2.872  
2.857  
2.706  
2.688  
2.668  
2.440  
2.433  
2.426  
2.417  
2.405  
2.400  
2.369  
2.367  
2.350  
2.331  
2.328  
2.322  
2.316  
2.312  
2.307  
2.302  
2.297  
2.292  
2.287  
2.282  
1.995  
1.979  
1.962  
1.946  
1.931

S91

with CDCl<sub>3</sub>

<sup>1</sup>H NMR, CDCl<sub>3</sub>  
Pulse Sequence: zg  
Spectrometer Freq.: 400.13 MHz  
Spectral Width: 20.42 ppm  
Number of Scans: 1  
Relaxation Delay: 1.000 s

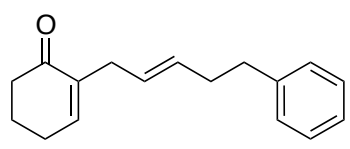

Table 6, Entry 4, 7c

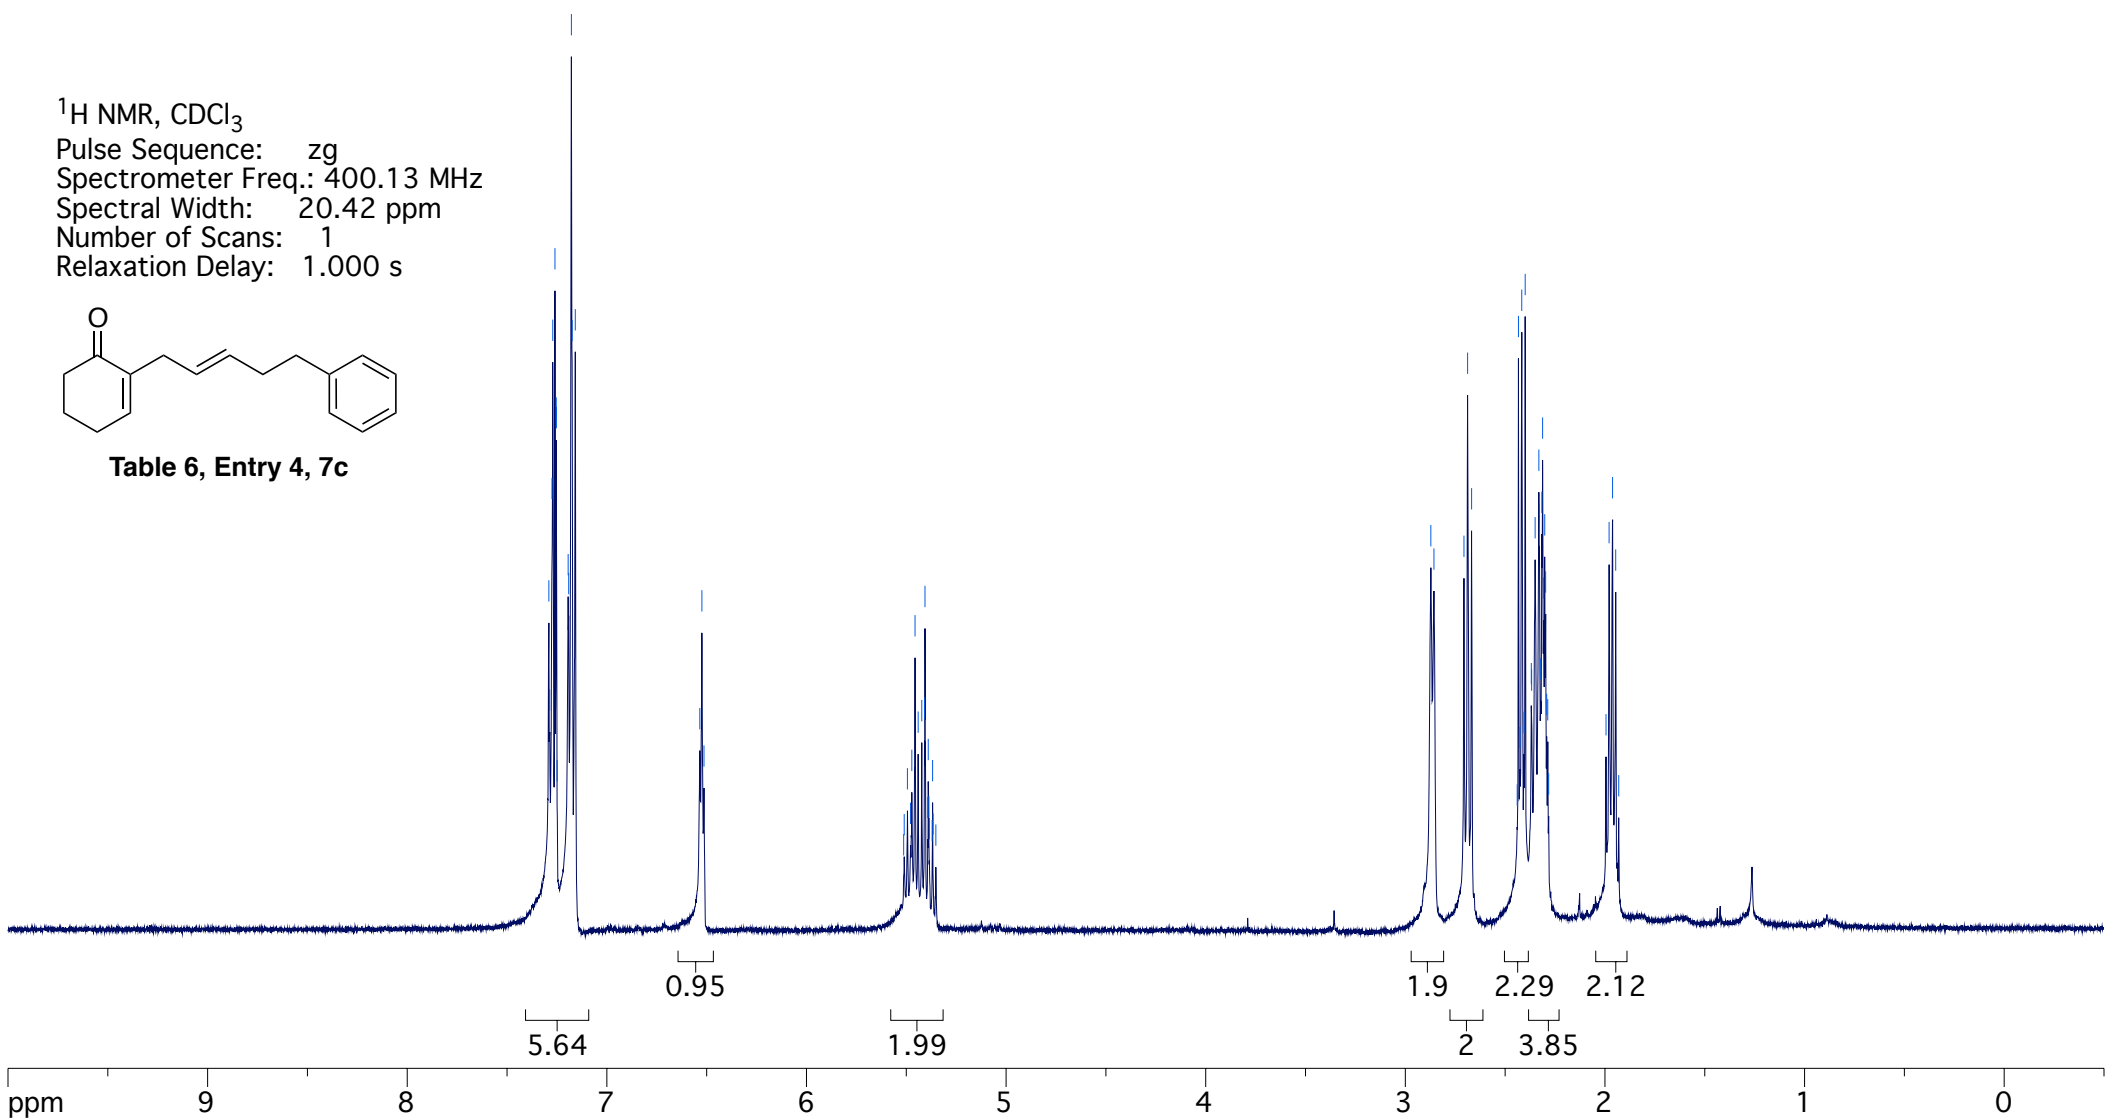

<sup>13</sup>C NMR, CDCl<sub>3</sub>  
Pulse Sequence: zgdc  
Spectrometer Freq.: 100.62 MHz  
Spectral Width: 301.16 ppm  
Number of Scans: 119  
Relaxation Delay: 2.000 s

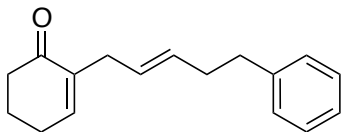

Table 6, Entry 4, 7c

199.285  
S92

145.593  
142.083  
138.738  
131.680  
128.666  
128.335  
127.945  
125.816

77.478  
77.160  
76.841

38.602  
35.969  
34.442  
32.206  
26.209  
23.229

ppm

200

150

100

50

-0

-50

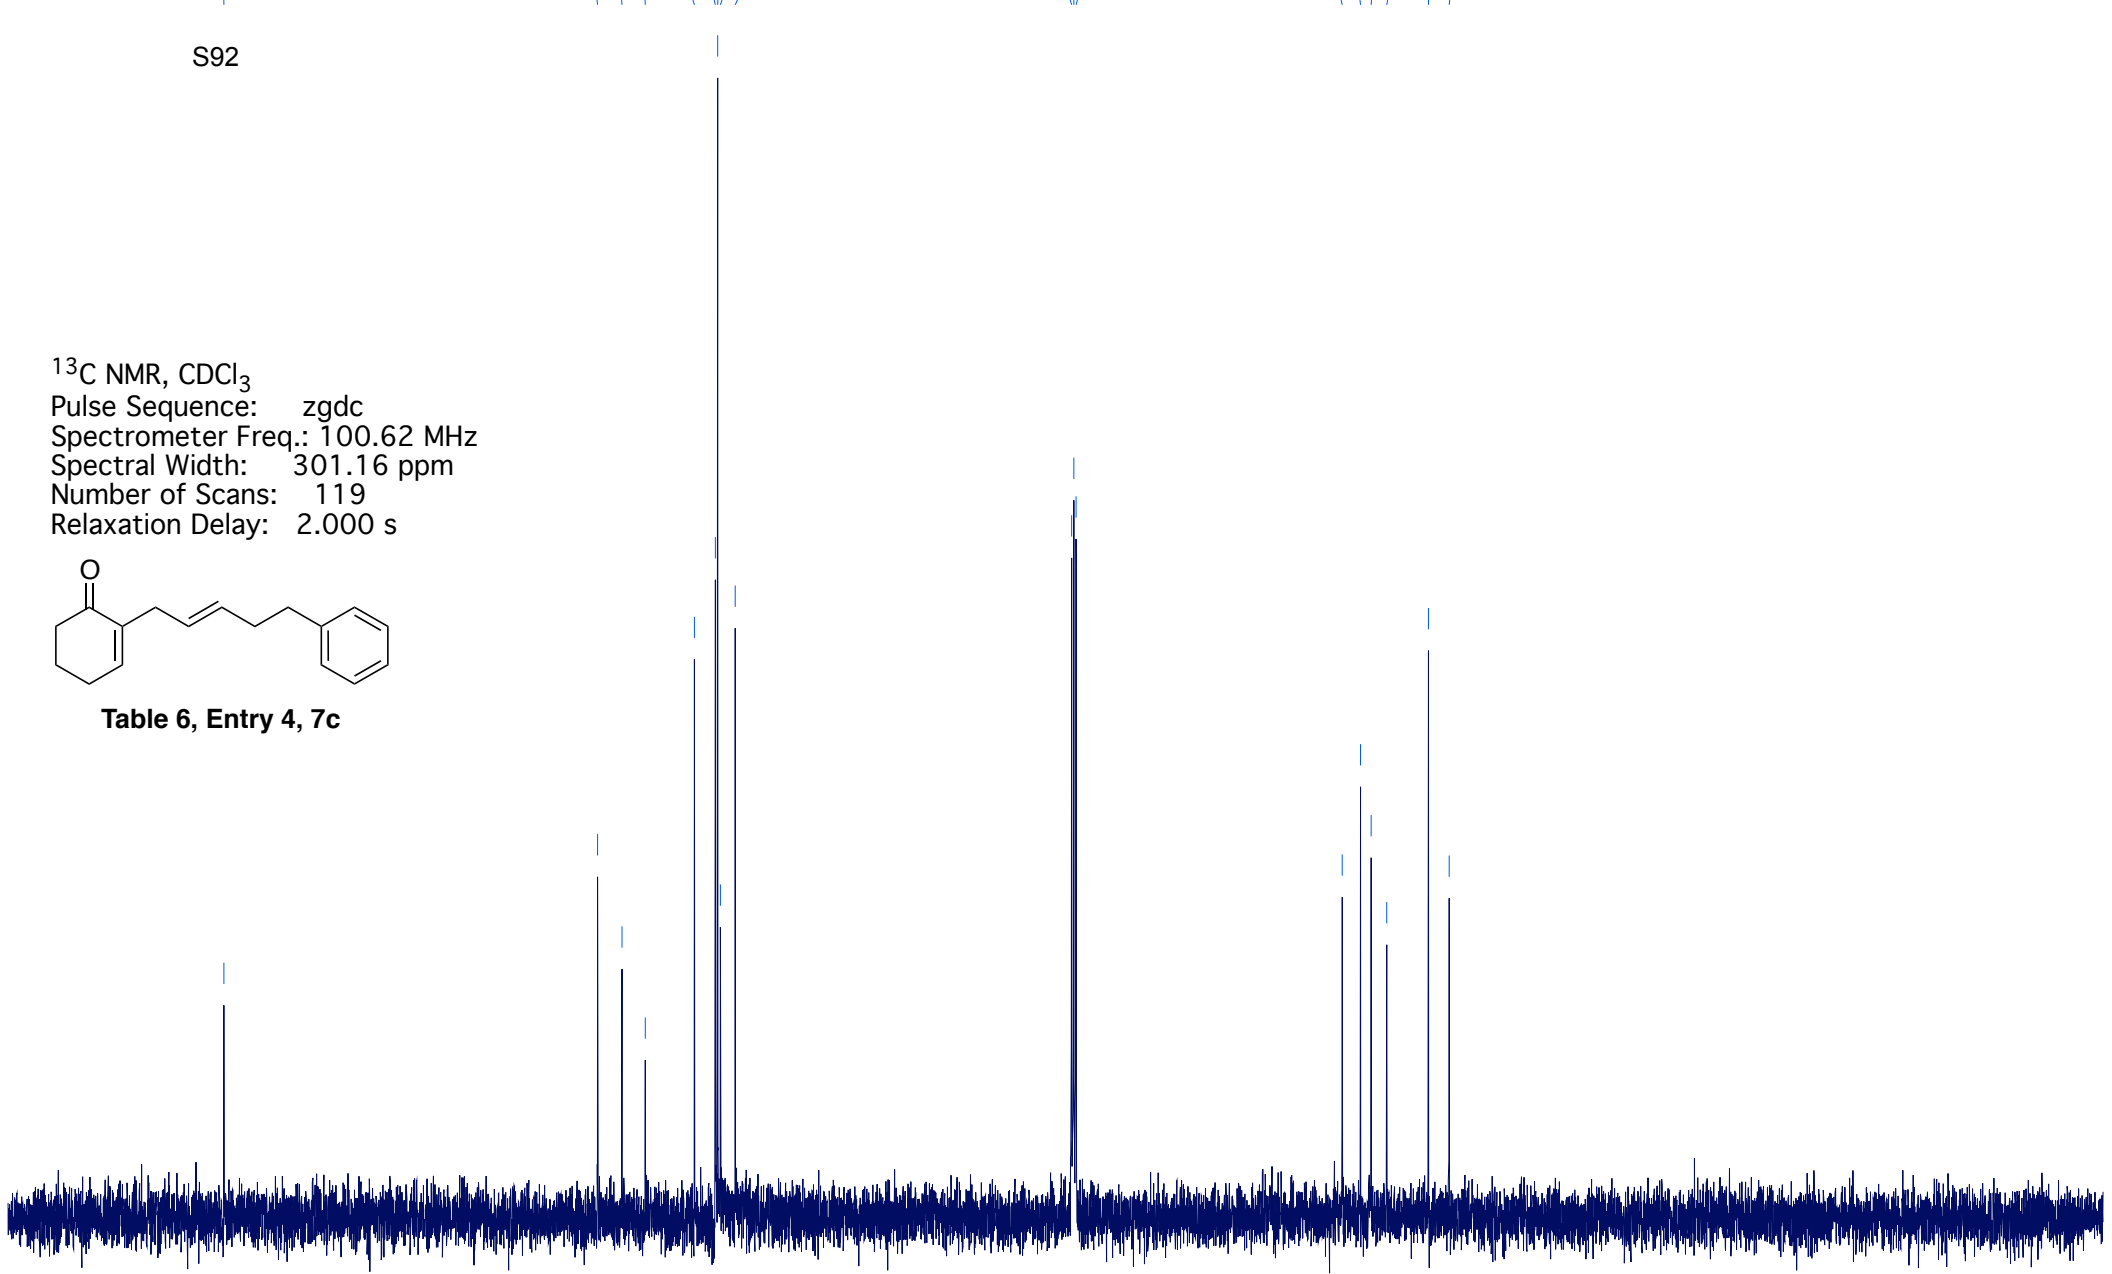

Supplement: NIHMS418453-supplement-2_si_002.pdf [file NIHMS418453-supplement-2_si_002.pdf]
