# Supplementary material
Source: PubMed Central journal article supplement (PMC3510762)
Supplement: NIHMS418453-supplement-1_si_001.pdf [file NIHMS418453-supplement-1_si_001.pdf]

# Direct Cross-coupling of Organic Halides with Allylic Acetates

Lukiana L. Anka-Lufford, Michael R. Prinsell and Daniel J. Weix\*  
Department of Chemistry, University of Rochester, Rochester, NY, USA 14627-0216

## Supporting Information

### Table of Contents

|      |                                 |     |
|------|---------------------------------|-----|
| I.   | Supplemental Tables             | S2  |
| II.  | Example GC Yield Calculation    | S8  |
| III. | NMR spectra (separate document) | S10 |

**Table S1:** Selectivity Data for the Coupling Reactions of Iodoarenes with Cinnamyl Acetate in Table 2<sup>a</sup>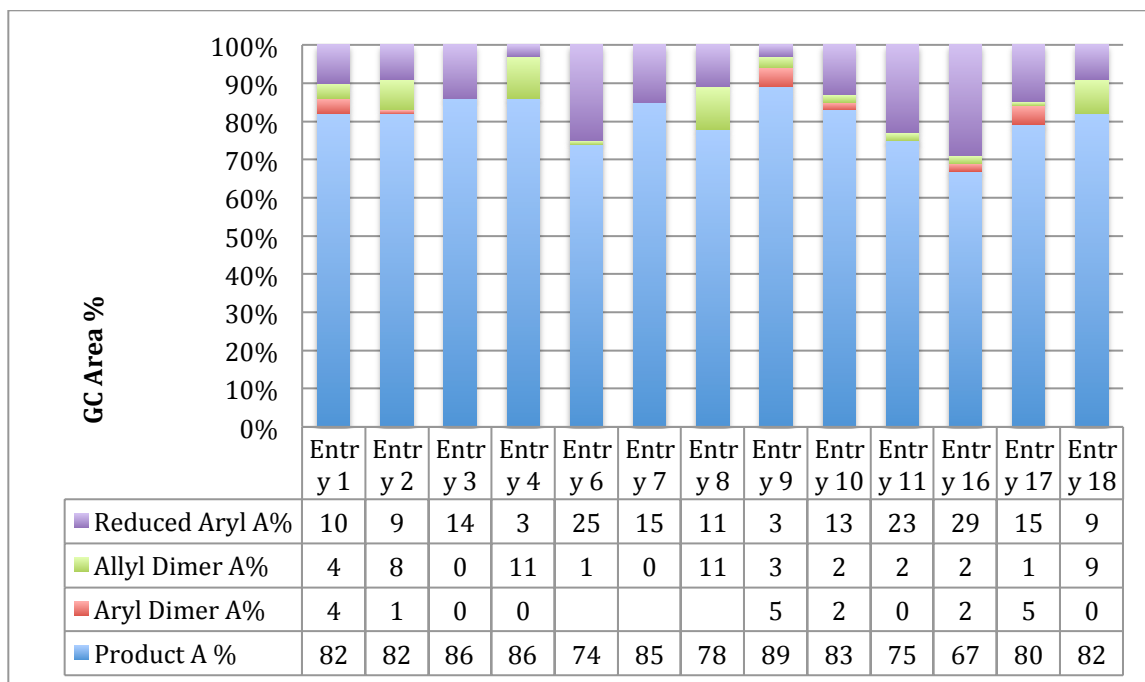

<sup>a</sup>GC area% ratios are uncorrected. The high molecular weight of both the product and the aryl dimer for entry 5 prevented GC analysis. The similarly, the high MW for the aryl dimer of entries 6, 7 & 8 prevented detection by GC.

| Entry | Ar-X | product                                 | yield <sup>b</sup> |
|-------|------|-----------------------------------------|--------------------|
|       |      |                                         |                    |
| 1     | I    | 1 mmol scale, set up in glovebox        | 88                 |
| 2     | I    | 10 mmol scale, set up on benchtop       | 81                 |
|       |      |                                         |                    |
| 3     | I    | R = C(O)Me ( <b>3b</b> )                | 71                 |
| 4     | I    | R = CHO ( <b>3c</b> )                   | 70                 |
| 6     | I    | R = NHC(O)CF <sub>3</sub> ( <b>3e</b> ) | 64                 |
| 7     | I    | R = CH <sub>2</sub> OTBS ( <b>3f</b> )  | 80                 |
| 8     | I    | R = NMe <sub>2</sub> ( <b>3g</b> )      | 55                 |
| 9     | I    | R = Me ( <b>3h</b> )                    | 86                 |
| 10    | I    | R = OMe ( <b>3i</b> )                   | 83                 |
| 11    | I    | R = Br ( <b>3j</b> )                    | 64                 |
| 16    | I    |                                         | 78                 |
|       |      | <b>(3n)</b>                             |                    |
|       |      |                                         |                    |
| 17    | I    | R = CN ( <b>3o</b> )                    | 86                 |
| 18    | I    | R = OMe ( <b>3p</b> )                   | 80                 |

<sup>b</sup> Isolated yields from Table 2.

**Table S2:** Selectivity Data for the Coupling Reactions of Bromoarenes with Cinnamyl Acetate in Table 2<sup>a</sup>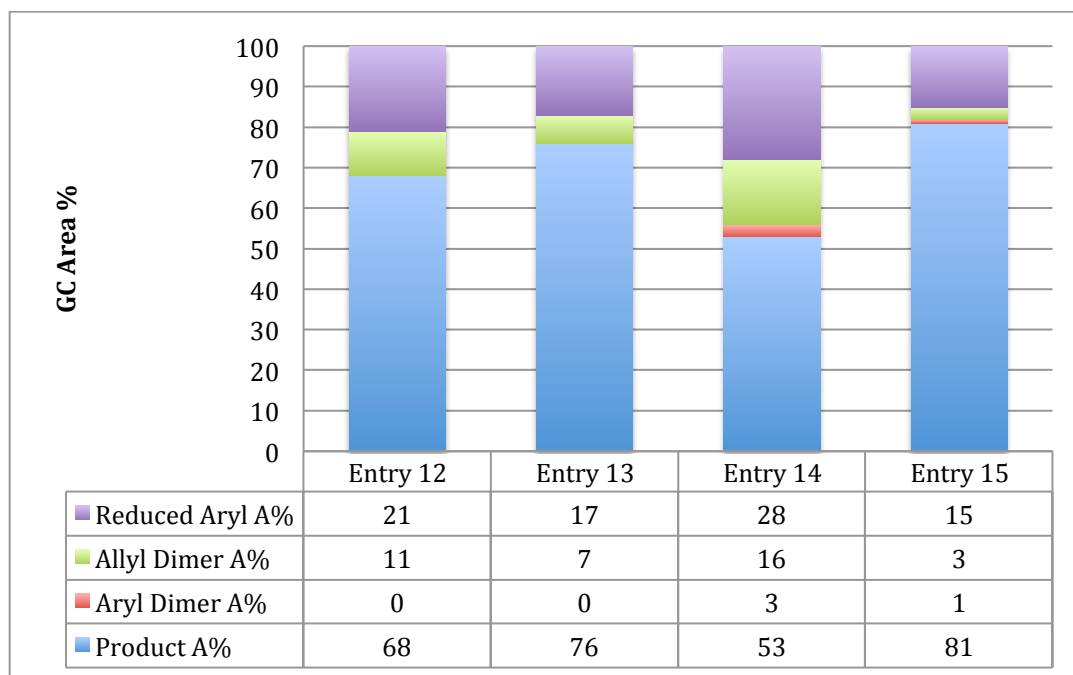<sup>a</sup>GC area% ratios are uncorrected.

| Entry | Ar-X | product                              | yield <sup>b</sup> |
|-------|------|--------------------------------------|--------------------|
|       |      |                                      |                    |
| 12    | Br   | R = CO <sub>2</sub> Me ( <b>3k</b> ) | 65                 |
| 13    | Br   | R = C(O)Me ( <b>3b</b> )             | 48                 |
| 14    | Br   | R = CF <sub>3</sub> ( <b>3l</b> )    | 51                 |
| 15    | Br   | R = CN ( <b>3m</b> )                 | 77                 |

<sup>b</sup> Isolated yields from Table 2.

**Table S3:** Selectivity Data for the Coupling Reactions of Substituted Allylic Acetates with Iodoarenes in Table 3<sup>a</sup>

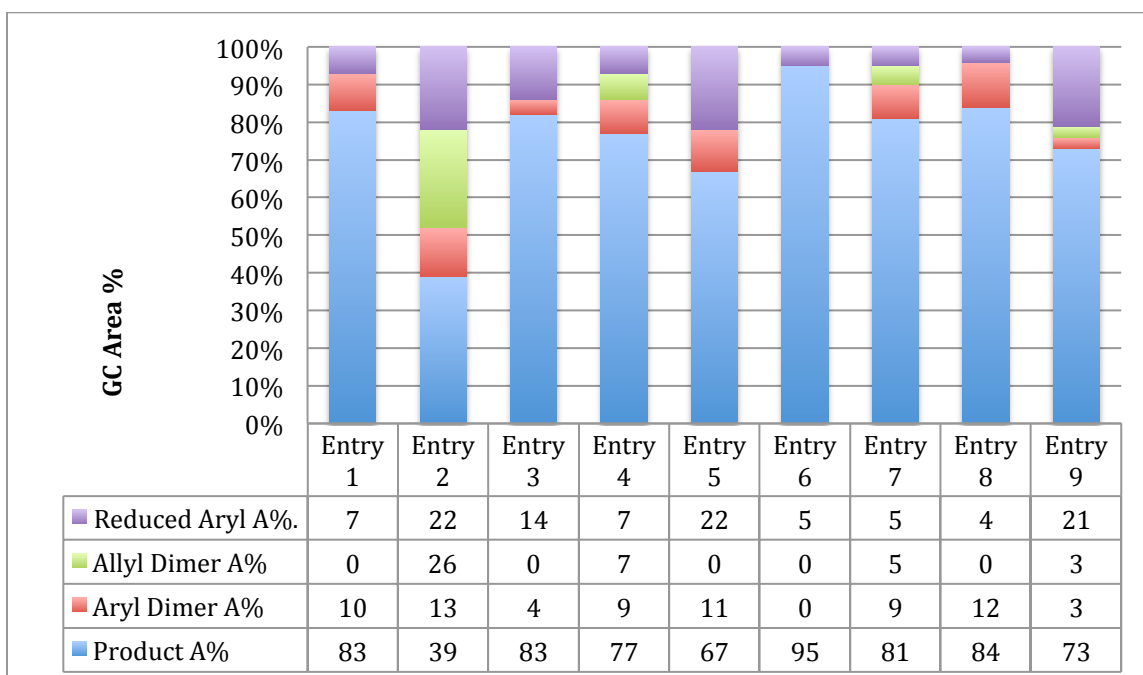

<sup>a</sup>GC area% ratios are uncorrected.

| Entry | allylic acetate | Product | yield <sup>b</sup> |
|-------|-----------------|---------|--------------------|
| 1     |                 |         | 81                 |
| 2     |                 |         | 52                 |
| 3     |                 |         | 75                 |
| 4     |                 |         | 97                 |
| 5     |                 |         | 55                 |
| 6     |                 |         | 65                 |
| 7     |                 |         | 52                 |
| 8     |                 |         | 80                 |
| 9     |                 |         | 73                 |

<sup>b</sup> Isolated yields from Table 3.

**Table S4:** Selectivity Data for the Coupling Reactions of Allylic Acetates with Alkyl Bromides in Table 4<sup>a</sup>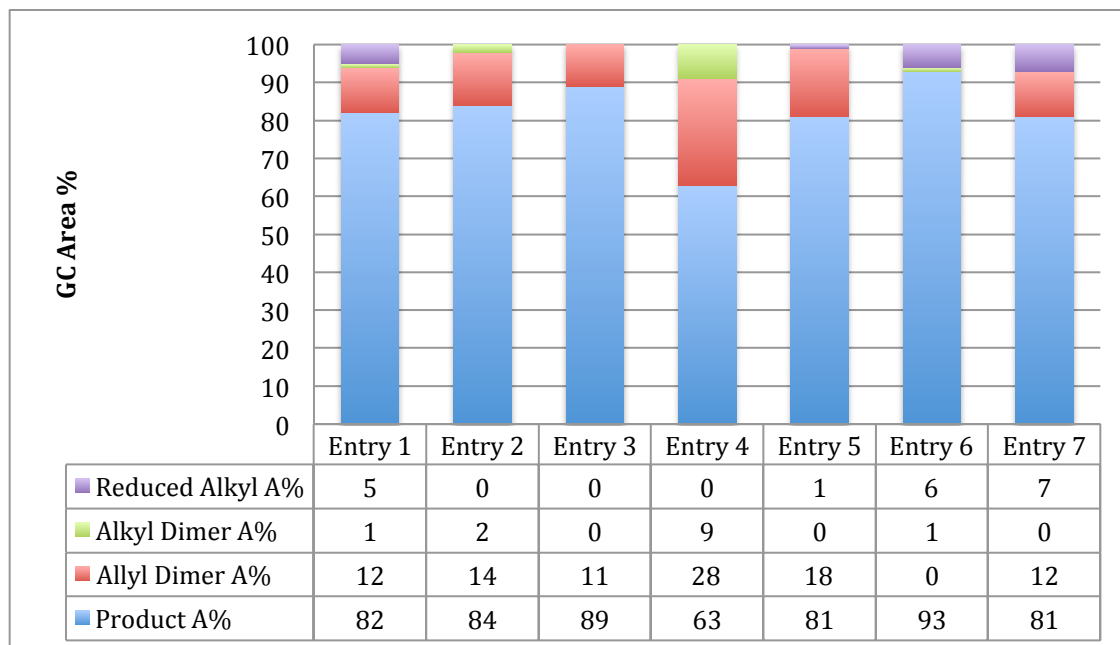

<sup>a</sup>GC area% ratios are uncorrected. All entries except entry 3 are an average of 2 runs. The alkyl reduction products of entries 2-4 were too low boiling and would elute with solvent, preventing detection by GC analysis. The allyl dimer for entry 6 was too high boiling for GC analysis on our instrument.

| Entry | product                                                                                                                                                       | yield <sup>b</sup> |
|-------|---------------------------------------------------------------------------------------------------------------------------------------------------------------|--------------------|
| 1     | 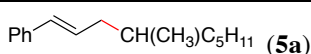 <b>(5a)</b>                                                               | 79                 |
| 2     |  <b>(5b)</b> Set up in glovebox                                            | 88                 |
| 3     | Set up in the benchtop <sup>c</sup>                                                                                                                           | 90                 |
| 4     |  <b>(5c)</b>                                                               | 68                 |
| 5     |  <b>(5d)</b>                                                               | 78                 |
| 6     |  <b>(5e)</b> Ar = <i>p</i> -MeO-C <sub>6</sub> H <sub>4</sub>              | 79                 |
| 7     |  <b>(5f)</b> Ar = <i>p</i> -F <sub>3</sub> C-C <sub>6</sub> H <sub>4</sub> | 66                 |

<sup>b</sup> Isolated yields from Table 4.

**Table S5:** Selectivity Data for the Coupling Reactions of Allylic Substrates with a Vinyl Bromide in Tables 5 and 6<sup>a</sup>

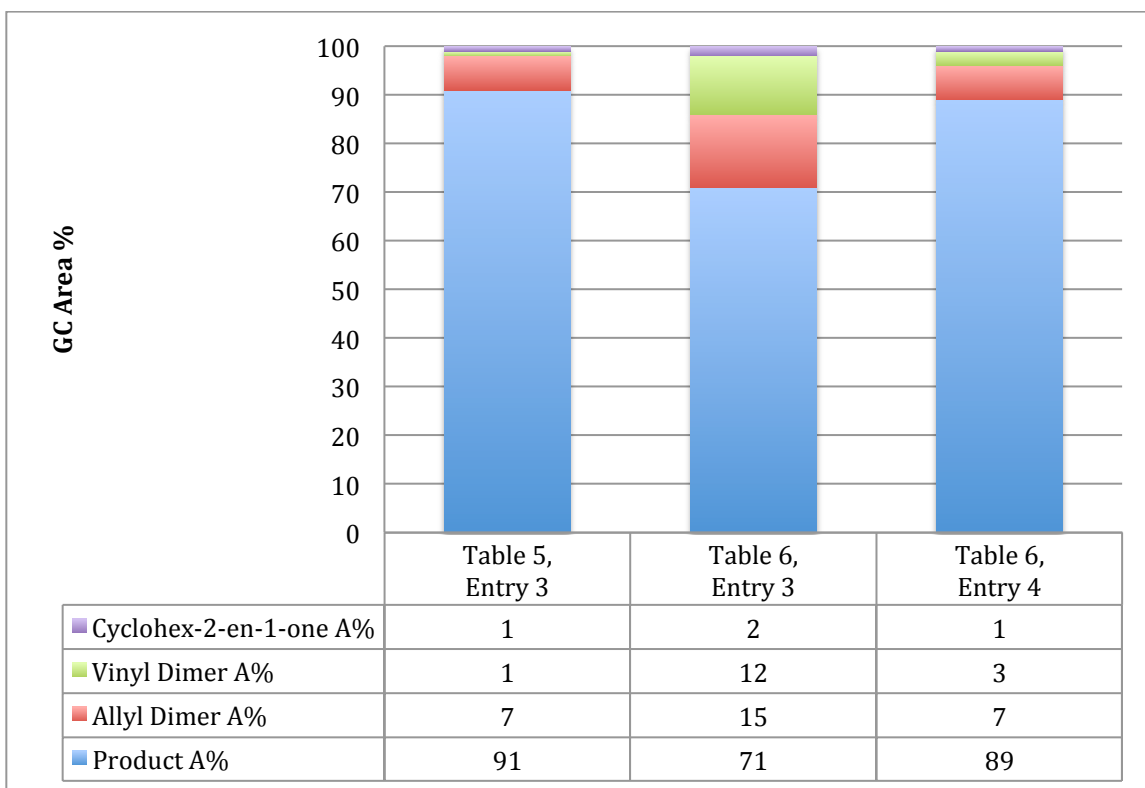

<sup>a</sup> GC area% ratios are uncorrected.

| Entry            | Starting Material | Product         | Yield <sup>b</sup> |
|------------------|-------------------|-----------------|--------------------|
| Table 5, Entry 3 | <br><b>(2c)</b>   | <br><b>(7a)</b> | 78                 |
| Table 6, Entry 3 | <br><b>(2m)</b>   | <br><b>(7b)</b> | 51                 |
| Table 6, Entry 4 | <br><b>(2n)</b>   | <br><b>(7c)</b> | 67                 |

<sup>b</sup> Isolated yields from Tables 5 and 6.

**Table S6:** Control reactions for the coupling of cinnamyl acetate with iodobenzene<sup>a</sup>

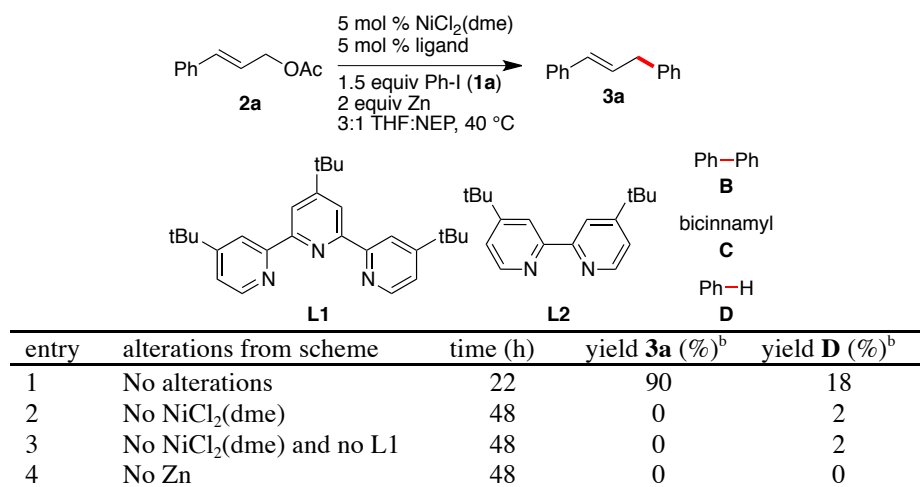

<sup>a</sup> Reactions were run on a 0.5 mmol scale in 1 ml of 3:1 THF:NEP. <sup>b</sup> Corrected GC yields vs. an internal standard (dodecane). Amount of **4** and **5** produced was negligible in all cases but the standard reaction.

## II. Example GC Yield Calculation

GC chromatogram from Table 1, Entry 1 (with terpyridine **L1**):

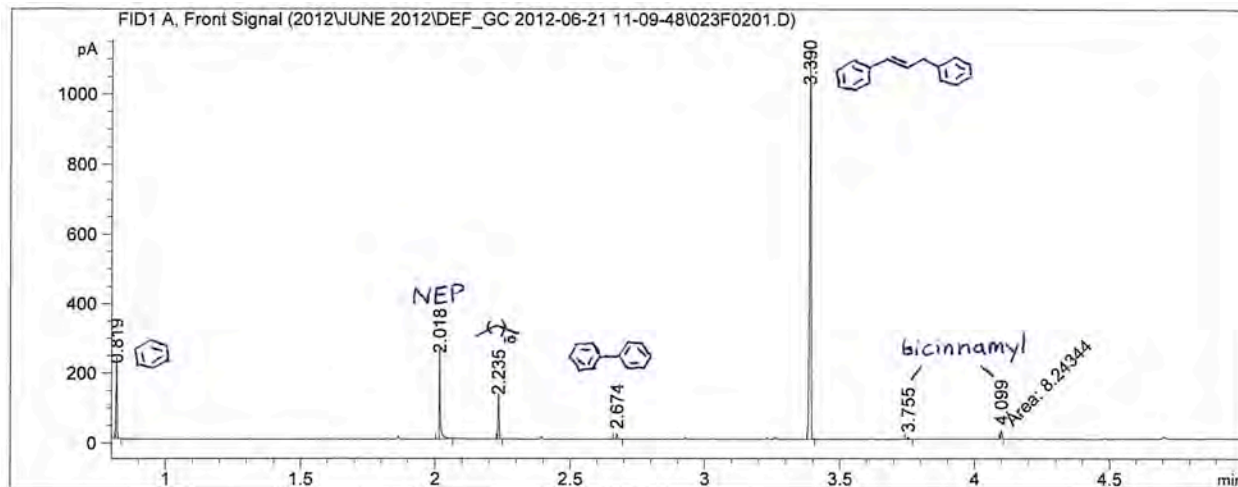

=====  
 Area Percent Report  
 =====

Sorted By : Retention Time  
 Multiplier: : 1.0000  
 Dilution: : 1.0000  
 Do not use Multiplier & Dilution Factor with ISTDs

Signal 1: FID1 A, Front Signal

| Peak # | RetTime [min] | Sig | Type | Area [pA*s] | Height [pA] | Area %   |
|--------|---------------|-----|------|-------------|-------------|----------|
| 1      | 0.819         | 1   | BB   | 64.71152    | 201.13582   | 10.38658 |
| 2      | 2.018         | 1   | BB   | 72.92727    | 231.00208   | 11.70526 |
| 3      | 2.235         | 1   | BB   | 37.65450    | 112.79506   | 6.04377  |
| 4      | 2.674         | 1   | BB   | 5.44882     | 14.77481    | 0.87457  |
| 5      | 3.390         | 1   | BB   | 431.64377   | 1054.72852  | 69.28137 |
| 6      | 3.755         | 1   | BB   | 2.40078     | 5.21727     | 0.38534  |
| 7      | 4.099         | 1   | MM   | 8.24344     | 24.97758    | 1.32312  |

Totals : 623.03010 1644.63112

$$\text{mmol Product} = \frac{(\text{Area Product}) \times (\text{mmol Internal Standard})}{(\text{Area Internal Standard}) \times (\text{Correction Factor})}$$

$$\text{mmol Product} = \frac{431.64377 \times 0.044}{37.65450 \times 1.12}$$

$$\text{mmol Product} = 0.45$$

$$\text{GC Yield} = \frac{\text{mmol Product}}{\text{mmol Theoretical}} \times 100\%$$



$$GC\ Yield = \left(\frac{0.45}{0.50}\right) \times 100\%$$

$$GC\ Yield = 90\%$$

GC chromatogram from Table 1, Entry 2 (with bipyridine **L2**):

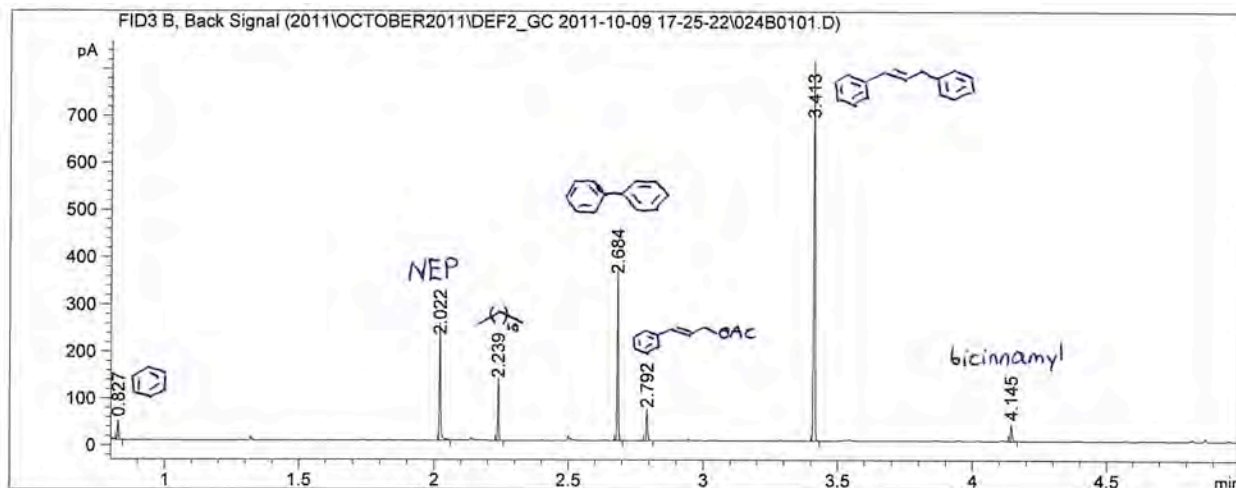

=====  
 Area Percent Report  
 =====

Sorted By : Retention Time  
 Multiplier: : 1.0000  
 Dilution: : 1.0000  
 Do not use Multiplier & Dilution Factor with ISTDs

Signal 1: FID3 B, Back Signal

| Peak # | RetTime [min] | Sig | Type | Area [pA*s] | Height [pA] | Area %   |
|--------|---------------|-----|------|-------------|-------------|----------|
| 1      | 0.827         | 1   | VB   | 14.26214    | 38.55714    | 2.38767  |
| 2      | 2.022         | 1   | BB   | 79.97160    | 214.97862   | 13.38831 |
| 3      | 2.239         | 1   | BB   | 38.76766    | 123.18441   | 6.49022  |
| 4      | 2.684         | 1   | BB   | 114.61913   | 344.47751   | 19.18877 |
| 5      | 2.792         | 1   | BB   | 23.92602    | 59.99182    | 4.00553  |
| 6      | 3.413         | 1   | BB   | 309.75629   | 675.46704   | 51.85733 |
| 7      | 4.145         | 1   | BB   | 16.02118    | 34.36098    | 2.68216  |

Totals : 597.32401 1491.01752

Similar to above, the calculated GC Yield is 62%.
